# Supplementary material for: Deficient GATA6-ACKR3/CXCR7 signaling leads to bicuspid aortic valve
Source: Research Square preprint supplement (doi:10.21203/rs.3.rs-3940202/v1), 2024-04-04
Supplement: Supplementary file 4 [file 6696dfc7b6226dee381a1541.docx]

**Deficient GATA6-ACKR3/CXCR7 signaling leads to bicuspid aortic valve**

Rebeca Piñeiro-Sabarís1,2, Donal MacGrogan1,2* and José Luis de la Pompa1,2*.

1Intercellular Signaling in Cardiovascular Development & Disease Laboratory, Centro Nacional de Investigaciones Cardiovasculares (CNIC), Melchor Fernández Almagro 3, 28029 Madrid SPAIN, 2Ciber de Enfermedades Cardiovasculares, Instituto de Salud Carlos III, Melchor Fernández Almagro 3, 28029 Madrid SPAIN

**Supplementary Figure Legends**

**Fig. S1.** **Generation of *Gata6STOP/+* mice by CRISPR-Cas9. (A)** Diagram of *Gata6* mouse gene organization and relevant protein domains (Gata-N and ZnF). The sequence of the crRNA containing the PAM site recognized by the Cas9 enzyme is shown. The frameshift mutation results in a premature termination codon (PTC) at aminoacid 291. **(B)** Sequencing of the targeted region of *Gata6STOP/+* and WT pups confirms a 4 bp deletion (from bp 849 to 852) of the cDNA (arrowhead). Also indicated are the 2 bp substitution GC>CG 853,854 (first square) and the 1 bp substitution G>A 856 (second square). Bp, base pairs. **(C)** H&E staining **of** E16.5 *Gata6STOP/+* and control of aortic valve and ventricle sections. **(D)** Quantification of % of BAV and VSD. Asterisks indicate the position of the leaflets. The arrowhead indicates VSD. rv, right ventricle. lv, left ventricle. p-values obtained by Fisher´s Exact test. n, number of embryos.

**Fig. S2.**  **Cardiac function parameters in 30 weeks-old *Gata6STOP/+* mice.** Left ventricle diastolic volume (LV VOL; d), left ventricle systolic volume (LV VOL; s), left ventricle mass (LV Mass C) measurements. The ratio of the early (E) to late (A) ventricular filling velocities of mitral valve (MVE/A) for diastolic dysfunction. Strain %. Data are represented as means ± SD. p-values obtained by Student's t-test. n, number of mice.

**Fig. S3.**  **Deleting GATA6 in endocardium/endothelium or myocardium does not recapitulate the *Gata6STOP/+* phenotype. (A)** H&E staining of E16.5 *Gata6flox/flox; Tie2Cre* and control aortic valve and ventricle sections. The white arrowhead points to the overriding aorta (OA). rv, right ventricle. lv, left ventricle. **(B)** Quantification of % BAV and OA. **(C)** H&E staining of E16.5 *Gata6flox/flox; Nkx2.5Cre* and control aortic valve sections and ventricle sections. (**D)** Quantification of % BAV and ventricular septal defect (VSD). Asterisks indicate the position of the leaflets. The arrowhead points to the VSD. p-values obtained by Fisher´s Exact test. n, number of embryos.

**Fig. S4.** **Impaired migration and invasion in E11.5 *Gata6STOP/+* OFT explants. (A)** Depiction of the explant assay. OFTs are dissected, opened longitudinally and the endocardial side is placed face down on the collagen gel, where mesenchymal cells can migrate. **(B)** Fluorescence immunostaining of *Gata6STOP/+*and control explants for EdU. Proliferating cells (green) are indicated by yellow arrows. α-SMA demarcates the mesenchyme (red), DAPI, nuclear counterstain (blue). **(B’)** High magnification views of boxed areas with of body of the explant and outwardly migrating mesenchymal cells. **(B’’)** 2D orthogonal view of the explants showing mesenchymal cell invasion into the collagen gel. White arrowheads indicate invading cells. **(C)** Quantification of mesenchymal migration, invasion and proliferation. Data are represented as means ± SD. p-values were obtained by Student's t-test.

**Fig. S5.**  **Supplementing OFT explants with a CXCR7 agonist decreases migration and increases invasion. (A-C)** Fluorescence immunostaining for EdU of E11.5 WT OFT explants treated with carrier solution and indicated amounts of VUF11207. Proliferating cells (green) are indicated by yellow arrows. α-SMA demarcates mesenchyme (red). DAPI, nuclear counterstain (blue). **(A’-C’)** High magnification views of boxed areas with of body of the explant and outwardly migrating mesenchymal cells. Yellow arrowheads indicate proliferating cells. **(A’’-C’’)** 2D orthogonal view of the explants showing mesenchymal cell invasion into the collagen gel. White arrowheads indicate invading cells. **(D)** Quantification of mesenchymal migration, invasion and proliferation. Data are represented as means ± SD. p-values were obtained by Student's t-test.

**Supplementary Table legends**

**Table S1. Lethality Table**

Sheet 1: *Gata6flox/flox;Nkx2.5Cre*

**Table S2. RNA-seq of E11.5 *Gata6STOP/+* OFT**Sheet 1: raw and normalized gene expression, annotations and differential expression analysis results for all genes.
Sheet 2: differentially expressed (DE) genes (adj p-val<0.05), 113 total, 53 up-regulated, 60 down-regulated.
Sheet 3: Panther enrichment results for the collection of 113 DE genes, against the Biological Process GO term database, diseases and functions.

Sheet 4: GSEA Hallmark gene sets with NOM p-val<0.1.

**Table S3. Material and Methods resources**

Sheet 1: CRISPR-Cas9 reactives
Sheet 2: Microinjection summary
Sheet 3: Primers Genotyping

Sheet 4: Probe

Sheet 5: Antibodies

Sheet 6: Drug concentration

**Table S4: Statistics**

Organized per Figure and Figures S

**Supplementary movies legends**

**Movie S1** (from Figure 2A). 3D OFT modeling with IMARIS software of E11.5 control mice. Whole mount (WM) IF at E11.5 with IsoB4 for endocardium (white) and DAPI for counterstaining.

**Movie S2** (from Figure 2B). 3D OFT modeling with IMARIS software of E11.5 *Gata6STOP/+* mice. Whole mount (WM) IF at E11.5 with IsoB4 for endocardium (white) and DAPI for counterstaining.
