# Supplementary material for: Deficient GATA6-ACKR3/CXCR7 signaling leads to bicuspid aortic valve
Source: Research Square preprint supplement (doi:10.21203/rs.3.rs-3940202/v1), 2024-04-04
Supplement: Supplementary file 5 [file bc631dd41dcb67aa52692753.xlsx]

## Sheet: Sheet 1. RNA-seq raw data
ID	mgi_symbol	AvrExp	ave_Mut_Het	ave_WT_Het	foldChange	logFC	P.Value	adj.P.Val	chr	start	end	strand	biotype	desc	ensembl_transcript_id	Norm_S5_MUT1_EAX	Raw_S5_MUT1_EAX	Norm_S6_MUT3_EAX	Raw_S6_MUT3_EAX	Norm_S7_MUT4_EAX	Raw_S7_MUT4_EAX	Norm_S8_MUT5_EAX	Raw_S8_MUT5_EAX	Norm_S2_WT3_EAX	Raw_S2_WT3_EAX	Norm_S3_WT4_EAX	Raw_S3_WT4_EAX	Norm_S4_WT5_EAX	Raw_S4_WT5_EAX
ENSMUSG00000106831	Ube2n-ps1	2.72355	4.76621	0	1145.03	10.1612	3.30854e-43	4.87414e-39	5	76232612	76233070	-1	processed_pseudogene	ubiquitin-conjugating enzyme E2N, pseudogene 1 [Source:MGI Symbol;Acc:MGI:894296]	ENSMUST00000201768	1.78902	51	10.4334	288	2.88819	71	3.95421	136	0	0	0	0	0	0
ENSMUSG00000027996	Sfrp2	84.9041	64.2228	112.479	-2.03692	-1.02639	5.53077e-25	4.07397e-21	3	83766321	83774316	1	protein_coding	secreted frizzled-related protein 2 [Source:MGI Symbol;Acc:MGI:108078]	ENSMUST00000029625,ENSMUST00000140261,ENSMUST00000154794	89.8721	2562	42.422	1171	55.6892	1369	68.9079	2370	102.081	2129	99.7833	2892	135.573	2421
ENSMUSG00000091086	Rpl6l	1.36124	2.37019	0.0159826	147.603	7.20558	4.56088e-23	2.2397e-19	10	111125851	111126721	1	processed_pseudogene	ribosomal protein L6-like [Source:MGI Symbol;Acc:MGI:3647789]	ENSMUST00000171120	0.561262	16	5.83258	161	1.3424	33	1.7445	60	0.0479478	1	0	0	0	0
ENSMUSG00000059772	Slx1b	63.1987	80.1575	40.587	1.83359	0.874667	2.25649e-19	8.31064e-16	7	126689468	126695784	-1	protein_coding	SLX1 structure-specific endonuclease subunit homolog B (S. cerevisiae) [Source:MGI Symbol;Acc:MGI:1915220]	ENSMUST00000084586,ENSMUST00000142337,ENSMUST00000144897,ENSMUST00000155012	93.5904	2668	62.9629	1738	107.555	2644	56.5219	1944	37.5431	783	52.4104	1519	31.8074	568
ENSMUSG00000069302	H2ac12	1.03807	0.420946	1.86091	-433.864	-8.7611	4.03709e-17	1.18949e-13	13	22035164	22035568	-1	protein_coding	H2A clustered histone 12 [Source:MGI Symbol;Acc:MGI:2448295]	ENSMUST00000091742	1.68379	48	0	0	0	0	0	0	1.1028	23	0	0	4.47992	80
ENSMUSG00000052516	Robo2	89.1807	65.7428	120.431	-1.92911	-0.947939	2.59316e-14	6.36707e-11	16	73891839	74411825	-1	protein_coding	roundabout guidance receptor 2 [Source:MGI Symbol;Acc:MGI:1890110]	ENSMUST00000116586,ENSMUST00000117200,ENSMUST00000117785,ENSMUST00000137420,ENSMUST00000138852,ENSMUST00000140062,ENSMUST00000147408,ENSMUST00000149114,ENSMUST00000156010,ENSMUST00000226478,ENSMUST00000227347,ENSMUST00000231426,ENSMUST00000231889	77.2086	2201	55.7536	1539	67.3233	1655	62.6858	2156	145.761	3040	106.166	3077	109.366	1953
ENSMUSG00000118057	B020010K11Rik	50.3047	34.7015	71.109	-1.89243	-0.92024	6.44955e-14	1.35735e-10	18	82336250	82361600	-1	lncRNA	RIKEN cDNA B020010K11 gene [Source:MGI Symbol;Acc:MGI:3612155]	ENSMUST00000235445	27.8877	795	32.6769	902	35.2685	867	42.9729	1478	73.0725	1524	51.7203	1499	88.5343	1581
ENSMUSG00000055228	Zfp935	0.730619	0.403407	1.1669	-231.203	-7.85301	2.41616e-13	4.44936e-10	13	62453715	62558511	-1	protein_coding	zinc finger protein 935 [Source:MGI Symbol;Acc:MGI:1918758]	ENSMUST00000076195	1.61363	46	0	0	0	0	0	0	0	0	2.38072	69	1.11998	20
ENSMUSG00000006574	Slc4a1	79.8486	90.087	66.1975	1.54295	0.625693	2.6318e-12	4.30796e-09	11	102348824	102366203	-1	protein_coding	solute carrier family 4 (anion exchanger), member 1 [Source:MGI Symbol;Acc:MGI:109393]	ENSMUST00000006749,ENSMUST00000128405,ENSMUST00000145636,ENSMUST00000149993,ENSMUST00000151050	57.6346	1643	73.8672	2039	86.5237	2127	142.322	4895	49.0986	1024	51.2718	1486	98.2222	1754
ENSMUSG00000055254	Ntrk2	23.1416	30.23	13.6904	1.84534	0.883889	1.21945e-11	1.79649e-08	13	58806569	59133970	1	protein_coding	neurotrophic tyrosine kinase, receptor, type 2 [Source:MGI Symbol;Acc:MGI:97384]	ENSMUST00000079828,ENSMUST00000109838,ENSMUST00000223636,ENSMUST00000224259,ENSMUST00000224402,ENSMUST00000225119,ENSMUST00000225488,ENSMUST00000225583,ENSMUST00000225950,ENSMUST00000226021	44.6554	1273	19.3815	535	26.0344	640	30.8486	1061	11.6513	243	13.1802	382	16.2397	290
ENSMUSG00000090625	Gm20721	54.4829	41.2103	72.1797	-1.65205	-0.724256	2.97851e-11	3.98903e-08	2	174330319	174346712	-1	protein_coding	predicted gene, 20721 [Source:MGI Symbol;Acc:MGI:5313030]	ENSMUST00000168292	35.7454	1019	41.5888	1148	40.8415	1004	46.6655	1605	69.4764	1449	56.7923	1646	90.2703	1612
ENSMUSG00000078606	Gm4070	2.61874	4.18377	0.532025	8.96833	3.16484	1.06157e-10	1.30326e-07	7	105895139	105953967	-1	protein_coding	predicted gene 4070 [Source:MGI Symbol;Acc:MGI:3782245]	ENSMUST00000106766,ENSMUST00000176467,ENSMUST00000176969,ENSMUST00000176994	6.17388	176	3.11554	86	5.20688	128	2.23878	77	0.0479478	1	1.38013	40	0.167997	3
ENSMUSG00000078308	Gm47854	74.4951	53.2059	102.881	-1.75089	-0.808092	2.03319e-10	2.30407e-07	9	51621425	51655127	-1	lncRNA	predicted gene, 47854 [Source:MGI Symbol;Acc:MGI:6097063]	ENSMUST00000089534	40.6213	1158	53.2177	1469	57.113	1404	61.8717	2128	108.985	2273	72.5948	2104	127.062	2269
ENSMUSG00000025270	Alas2	31.2593	36.2176	24.6481	1.71726	0.780111	2.61103e-10	2.74755e-07	X	150547375	150570638	1	protein_coding	aminolevulinic acid synthase 2, erythroid [Source:MGI Symbol;Acc:MGI:87990]	ENSMUST00000066337,ENSMUST00000112715,ENSMUST00000134670,ENSMUST00000142474	21.6437	617	30.1048	831	35.1464	864	57.9757	1994	17.5489	366	17.7002	513	38.6953	691
ENSMUSG00000051379	Flrt3	112.607	98.316	131.662	-1.49411	-0.57929	7.65224e-10	7.51552e-07	2	140650914	140671469	-1	protein_coding	fibronectin leucine rich transmembrane protein 3 [Source:MGI Symbol;Acc:MGI:1918686]	ENSMUST00000056760,ENSMUST00000110057,ENSMUST00000172544	128.424	3661	76.8741	2122	96.2053	2365	91.7609	3156	124.664	2600	125.454	3636	144.869	2587
ENSMUSG00000090619	Vmn2r60	44.2626	32.2822	60.2364	-1.68231	-0.750442	2.5272e-09	2.32692e-06	7	42107770	42196208	1	protein_coding	vomeronasal 2, receptor 60 [Source:MGI Symbol;Acc:MGI:3647050]	ENSMUST00000166447,ENSMUST00000233266,ENSMUST00000233771	24.2395	691	35.0317	967	32.7871	806	37.0707	1275	62.2363	1298	42.8185	1241	75.6546	1351
ENSMUSG00000106106		57.8915	36.8595	85.934	-2.07325	-1.0519	2.80244e-09	2.42857e-06	17	39846353	39848827	-1	rRNA	18s RNA, related sequence 5	ENSMUST00000198477,ENSMUST00000205406	29.2207	833	30.1048	831	39.2957	966	48.817	1679	82.4223	1719	48.8221	1415	126.558	2260
ENSMUSG00000034248	Slc25a37	90.3203	100.111	77.2654	1.44035	0.526417	3.82297e-09	3.12888e-06	14	69241848	69285112	-1	protein_coding	solute carrier family 25, member 37 [Source:MGI Symbol;Acc:MGI:1914962]	ENSMUST00000037064,ENSMUST00000183882,ENSMUST00000184497,ENSMUST00000184914	71.4206	2036	91.365	2522	97.5477	2398	140.113	4819	63.0514	1315	61.8988	1794	106.846	1908
ENSMUSG00000028332	Hemgn	14.7244	17.7011	10.7555	1.86245	0.897202	4.3743e-09	3.3917e-06	4	46393989	46413506	-1	protein_coding	hemogen [Source:MGI Symbol;Acc:MGI:2136910]	ENSMUST00000071096,ENSMUST00000107764	11.3305	323	15.6864	433	17.3292	426	26.4583	910	9.25393	193	8.00475	232	15.0077	268
ENSMUSG00000021381	Barx1	6.73245	8.82601	3.94103	2.39031	1.2572	5.2958e-09	3.90089e-06	13	48662998	48666507	1	protein_coding	BarH-like homeobox 1 [Source:MGI Symbol;Acc:MGI:103124]	ENSMUST00000021813	7.40164	211	10.1436	280	9.35611	230	8.40269	289	4.69889	98	3.03628	88	4.08792	73
ENSMUSG00000069917	Hba-a2	288.871	323.909	242.154	1.53181	0.615239	6.66974e-09	4.67898e-06	11	32296489	32297298	1	protein_coding	hemoglobin alpha, adult chain 2 [Source:MGI Symbol;Acc:MGI:96016]	ENSMUST00000093207,ENSMUST00000147010	183.077	5219	268.625	7415	266.242	6545	577.692	19869	192.558	4016	159.439	4621	374.465	6687
ENSMUSG00000111824	Gm47102	1.23641	1.93497	0.305004	6.62879	2.72875	1.28134e-08	8.58034e-06	9	105087075	105090181	1	processed_pseudogene	predicted gene, 47102 [Source:MGI Symbol;Acc:MGI:6095838]	ENSMUST00000215114	1.71886	49	1.9925	55	1.99326	49	2.03525	70	0.479478	10	0.379535	11	0.0559989	1
ENSMUSG00000027562	Car2	40.0577	44.6257	33.9669	1.50621	0.590921	3.35857e-08	2.15124e-05	3	14886273	14900770	1	protein_coding	carbonic anhydrase 2 [Source:MGI Symbol;Acc:MGI:88269]	ENSMUST00000029078,ENSMUST00000192609,ENSMUST00000195520	28.2736	806	41.0092	1132	40.9228	1006	68.2973	2349	26.7069	557	24.7388	717	50.4551	901
ENSMUSG00000026100	Mstn	9.54282	7.57203	12.1705	-1.91296	-0.935807	9.03185e-08	5.54405e-05	1	53061640	53068079	1	protein_coding	myostatin [Source:MGI Symbol;Acc:MGI:95691]	ENSMUST00000027269,ENSMUST00000191197	11.1902	319	5.50653	152	6.26453	154	7.32691	252	12.0828	252	10.765	312	13.6637	244
ENSMUSG00000020061	Mybpc1	79.6341	93.2885	61.4282	1.56355	0.644821	1.13833e-07	6.70795e-05	10	88518279	88605152	-1	protein_coding	myosin binding protein C, slow-type [Source:MGI Symbol;Acc:MGI:1336213]	ENSMUST00000119185,ENSMUST00000121629,ENSMUST00000124144,ENSMUST00000148205,ENSMUST00000153964,ENSMUST00000156573,ENSMUST00000238199	87.6621	2499	95.35	2632	103.731	2550	86.4111	2972	72.8807	1520	49.5811	1437	61.8228	1104
ENSMUSG00000052217	Hbb-bh1	442.177	513.857	346.604	1.75563	0.811992	2.19186e-07	0.000124194	7	103841637	103843164	-1	protein_coding	hemoglobin Z, beta-like embryonic chain [Source:MGI Symbol;Acc:MGI:96024]	ENSMUST00000063957	308.028	8781	472.294	13037	562.099	13818	713.007	24523	307.489	6413	222.339	6444	509.982	9107
ENSMUSG00000057359	Gm17494	29.4791	21.5507	40.0504	-1.69538	-0.761609	6.12045e-07	0.00033395	3	122255958	122293720	-1	lncRNA	predicted gene, 17494 [Source:MGI Symbol;Acc:MGI:4937128]	ENSMUST00000072769,ENSMUST00000199060	16.8729	481	19.7438	545	24.814	610	24.7719	852	35.9129	749	30.5354	885	53.703	959
ENSMUSG00000073940	Hbb-bt	114.639	123.499	102.826	1.36817	0.45225	9.37684e-07	0.000493356	7	103812524	103813996	-1	protein_coding	hemoglobin, beta adult t chain [Source:MGI Symbol;Acc:MGI:5474850]	ENSMUST00000098192	74.9986	2138	110.348	3046	97.7104	2402	210.939	7255	71.4422	1490	77.9428	2259	159.093	2841
ENSMUSG00000112734	Gm47644	5.27532	3.36219	7.82616	-2.04151	-1.02964	1.86936e-06	0.000949633	10	53337753	53345085	-1	lncRNA	predicted gene, 47644 [Source:MGI Symbol;Acc:MGI:6096722]	ENSMUST00000218351,ENSMUST00000220401	1.9995	57	3.04308	84	3.57973	88	4.82646	166	5.99348	125	7.34919	213	10.1358	181
ENSMUSG00000040569	Slc26a7	3.7222	2.56583	5.26402	-2.36331	-1.24081	2.26297e-06	0.00111127	4	14502430	14621805	-1	protein_coding	solute carrier family 26, member 7 [Source:MGI Symbol;Acc:MGI:2384791]	ENSMUST00000042221,ENSMUST00000138042,ENSMUST00000143105,ENSMUST00000149633	3.50789	100	1.73891	48	2.80683	69	2.2097	76	4.93862	103	5.58952	162	5.2639	94
ENSMUSG00000005611	Mrvi1	27.2089	31.5689	21.3956	1.5066	0.591301	2.68725e-06	0.00124759	7	110868266	110982461	-1	protein_coding	MRV integration site 1 [Source:MGI Symbol;Acc:MGI:1338023]	ENSMUST00000005751,ENSMUST00000125758,ENSMUST00000127935,ENSMUST00000135590,ENSMUST00000142368,ENSMUST00000149923,ENSMUST00000154466	29.6767	846	31.3365	865	35.0244	861	30.2381	1040	22.056	460	19.5633	567	22.5676	403
ENSMUSG00000082107	Gm16216	12.5464	8.85725	17.4652	-1.81507	-0.860025	2.70994e-06	0.00124759	19	24289716	24290826	1	processed_pseudogene	predicted gene 16216 [Source:MGI Symbol;Acc:MGI:3801728]	ENSMUST00000118970	6.94562	198	7.93375	219	9.9663	245	10.5833	364	17.1174	357	13.2147	383	22.0636	394
ENSMUSG00000072944	Nup62cl	2.14444	3.03321	0.959421	3.34659	1.74269	2.96297e-06	0.00132274	X	140006805	140062712	-1	protein_coding	nucleoporin 62 C-terminal like [Source:MGI Symbol;Acc:MGI:2685565]	ENSMUST00000101212,ENSMUST00000124075,ENSMUST00000125678,ENSMUST00000133780,ENSMUST00000154385	2.73615	78	3.51404	97	3.29498	81	2.58768	89	0.719217	15	0.759071	22	1.39997	25
ENSMUSG00000110350	Gm10252	5.26619	3.34258	7.831	-2.14349	-1.09996	3.21616e-06	0.00139354	7	45459469	45460300	1	TEC	predicted gene 10252 [Source:MGI Symbol;Acc:MGI:3704292]	ENSMUST00000209541	2.87647	82	3.29667	91	2.80683	69	4.39033	151	7.52781	157	4.48542	130	11.4798	205
ENSMUSG00000058174	Gm5148	14.7729	10.9306	19.896	-1.65489	-0.726738	3.58023e-06	0.00150697	3	37714190	37724490	-1	protein_coding	predicted gene 5148 [Source:MGI Symbol;Acc:MGI:3646006]	ENSMUST00000079755,ENSMUST00000099128,ENSMUST00000108105,ENSMUST00000134904	8.20846	234	11.2667	311	11.1053	273	13.1419	452	19.8024	413	15.0779	437	24.8075	443
ENSMUSG00000097971	Gm26917	63.2446	53.5766	76.1353	-1.46244	-0.548375	4.94209e-06	0.00202241	17	39843013	39846341	1	lncRNA	predicted gene, 26917 [Source:MGI Symbol;Acc:MGI:5504032]	ENSMUST00000182520,ENSMUST00000192833	58.1608	1658	47.3852	1308	59.5944	1465	49.1659	1691	76.8603	1603	66.3152	1922	85.2304	1522
ENSMUSG00000068196	Col8a1	10.0889	12.1763	7.30566	1.73963	0.798778	5.55708e-06	0.00208967	16	57624258	57754737	-1	protein_coding	collagen, type VIII, alpha 1 [Source:MGI Symbol;Acc:MGI:88463]	ENSMUST00000089332,ENSMUST00000232382	10.7692	307	13.7301	379	11.8782	292	12.3278	424	7.76755	162	6.14157	178	8.00785	143
ENSMUSG00000029231	Pdgfra	226.871	192.803	272.294	-1.49434	-0.579509	5.59217e-06	0.00208967	5	75152292	75198215	1	protein_coding	platelet derived growth factor receptor, alpha polypeptide [Source:MGI Symbol;Acc:MGI:97530]	ENSMUST00000000476,ENSMUST00000168162,ENSMUST00000200822,ENSMUST00000201241,ENSMUST00000201711,ENSMUST00000202161,ENSMUST00000202186,ENSMUST00000202681,ENSMUST00000202992	223.172	6362	158.748	4382	166.783	4100	222.511	7653	310.558	6477	226.721	6571	279.603	4993
ENSMUSG00000057378	Ryr3	17.8718	20.4505	14.4336	1.58877	0.667907	5.63776e-06	0.00208967	2	112631355	113217096	-1	protein_coding	ryanodine receptor 3 [Source:MGI Symbol;Acc:MGI:99684]	ENSMUST00000080673,ENSMUST00000091818,ENSMUST00000128192,ENSMUST00000134358,ENSMUST00000142537,ENSMUST00000146187,ENSMUST00000156757,ENSMUST00000207603,ENSMUST00000208135,ENSMUST00000208151,ENSMUST00000208290,ENSMUST00000208574	13.6808	390	24.7794	684	22.9021	563	20.4398	703	17.501	365	11.8001	342	13.9997	250
ENSMUSG00000090066	1110002E22Rik	70.8572	77.3657	62.1793	1.31408	0.394055	5.67382e-06	0.00208967	3	138065052	138081506	1	protein_coding	RIKEN cDNA 1110002E22 gene [Source:MGI Symbol;Acc:MGI:1915066]	ENSMUST00000163080,ENSMUST00000184925	64.1242	1828	80.533	2223	77.493	1905	87.3124	3003	62.3322	1300	59.8631	1735	64.3428	1149
ENSMUSG00000042938	Gm14117	3.06044	4.00552	1.80033	2.85281	1.51238	6.03025e-06	0.00216677	2	146305547	146306389	1	processed_pseudogene	predicted gene 14117 [Source:MGI Symbol;Acc:MGI:3651328]	ENSMUST00000122417	2.45552	70	1.9925	55	5.61367	138	5.96039	205	0.527426	11	1.34563	39	3.52793	63
ENSMUSG00000096768	Gm47283	95.7745	81.8402	114.354	-1.40331	-0.488836	7.85184e-06	0.00275413	Y	90784738	90816465	1	lncRNA	predicted gene, 47283 [Source:MGI Symbol;Acc:MGI:6096131]	ENSMUST00000177591,ENSMUST00000177671,ENSMUST00000179077,ENSMUST00000179483,ENSMUST00000238238,ENSMUST00000238471,ENSMUST00000238758	84.7506	2416	80.9678	2235	77.0049	1893	84.6375	2911	110.28	2300	134.839	3908	97.9422	1749
ENSMUSG00000026399	Cd55	42.5165	39.6852	46.2915	-1.43066	-0.516685	8.33407e-06	0.00285529	1	130439027	130462744	-1	protein_coding	CD55 molecule, decay accelerating factor for complement [Source:MGI Symbol;Acc:MGI:104850]	ENSMUST00000027650,ENSMUST00000122830,ENSMUST00000133057,ENSMUST00000140400,ENSMUST00000140725	59.599	1699	23.0043	635	42.4686	1044	33.6689	1158	39.4131	822	51.5823	1495	47.8791	855
ENSMUSG00000027009	Itga4	139.482	120.998	164.128	-1.39799	-0.483359	1.05099e-05	0.0035189	2	79255426	79333123	1	protein_coding	integrin alpha 4 [Source:MGI Symbol;Acc:MGI:96603]	ENSMUST00000099972,ENSMUST00000126312,ENSMUST00000135919,ENSMUST00000141094,ENSMUST00000155105	133.23	3798	110.855	3060	112.762	2772	127.145	4373	189.25	3947	147.122	4264	156.013	2786
ENSMUSG00000078880	Gm14308	3.00126	4.07112	1.57478	2.94802	1.55975	1.1045e-05	0.00361588	2	176613364	176636344	-1	protein_coding	predicted gene 14308 [Source:MGI Symbol;Acc:MGI:3782921]	ENSMUST00000108990,ENSMUST00000117267,ENSMUST00000119149,ENSMUST00000126807	0.806814	23	2.06495	57	3.90516	96	9.50754	327	0.767165	16	2.27721	66	1.67997	30
ENSMUSG00000063415	Cyp26b1	40.8142	48.8117	30.1508	1.57703	0.657213	1.15589e-05	0.00366306	6	84571414	84593908	-1	protein_coding	cytochrome P450, family 26, subfamily b, polypeptide 1 [Source:MGI Symbol;Acc:MGI:2176159]	ENSMUST00000077705,ENSMUST00000168003,ENSMUST00000204109,ENSMUST00000204146,ENSMUST00000205228	52.7235	1503	38.9805	1076	52.9231	1301	50.6197	1741	36.0088	751	27.8441	807	26.5995	475
ENSMUSG00000060044	Tmem26	31.9671	29.3595	35.4439	-1.4338	-0.519844	1.16864e-05	0.00366306	10	68723646	68782650	1	protein_coding	transmembrane protein 26 [Source:MGI Symbol;Acc:MGI:2143537]	ENSMUST00000080995,ENSMUST00000218918,ENSMUST00000219392	43.2523	1233	21.845	603	27.3361	672	25.0045	860	32.5086	678	34.3997	997	39.4233	704
ENSMUSG00000051839	Gypa	8.05389	9.60122	5.99079	1.88284	0.912909	1.34451e-05	0.00412654	8	80493781	80510542	1	protein_coding	glycophorin A [Source:MGI Symbol;Acc:MGI:95880]	ENSMUST00000063359	5.4723	156	9.52775	263	9.88494	243	13.5199	465	6.28116	131	3.79535	110	7.89585	141
ENSMUSG00000117789	Gm50388	2.35916	3.0536	1.43324	2.54982	1.3504	1.50066e-05	0.00451177	19	5038891	5049912	1	protein_coding	predicted gene, 50388 [Source:MGI Symbol;Acc:MGI:6303291]	ENSMUST00000236560	1.43823	41	2.64458	73	5.57299	137	2.5586	88	0.911008	19	2.38072	69	1.00798	18
ENSMUSG00000021506	Pitx1	2.08189	2.83005	1.08433	2.88688	1.52951	1.65335e-05	0.00487143	13	55825051	55836192	-1	protein_coding	paired-like homeodomain transcription factor 1 [Source:MGI Symbol;Acc:MGI:107374]	ENSMUST00000021968,ENSMUST00000173618	2.03457	58	2.71704	75	3.66109	90	2.90751	100	1.43843	30	0.862581	25	0.951982	17
ENSMUSG00000021061	Sptb	46.208	50.3404	40.6982	1.34266	0.425096	1.7841e-05	0.00514326	12	76580488	76710547	-1	protein_coding	spectrin beta, erythrocytic [Source:MGI Symbol;Acc:MGI:98387]	ENSMUST00000021458,ENSMUST00000166101,ENSMUST00000170532	36.5522	1042	47.9648	1324	48.2857	1187	68.559	2358	37.9747	792	35.8489	1039	48.2711	862
ENSMUSG00000047842	Diras2	35.579	28.6643	44.7986	-1.60463	-0.682243	1.81543e-05	0.00514326	13	52504380	52531279	-1	protein_coding	DIRAS family, GTP-binding RAS-like 2 [Source:MGI Symbol;Acc:MGI:1915453]	ENSMUST00000057442	31.1851	889	24.6345	680	34.0074	836	24.8301	854	55.7633	1163	39.7132	1151	38.9193	695
ENSMUSG00000052187	Hbb-y	1727.02	1916.07	1474.95	1.53267	0.616047	1.99557e-05	0.00554692	7	103851749	103853216	-1	protein_coding	hemoglobin Y, beta-like embryonic chain [Source:MGI Symbol;Acc:MGI:96027]	ENSMUST00000033229	1136.56	32400	1665.29	45968	1760.86	43287	3101.58	106675	1088.85	22709	987.896	28632	2348.09	41931
ENSMUSG00000100642	Gm28230	2.46858	1.26237	4.07687	-3.05682	-1.61203	2.18255e-05	0.00583971	2	74726728	74747918	1	protein_coding	predicted gene 28230 [Source:MGI Symbol;Acc:MGI:5578936]	ENSMUST00000053932	0.876972	25	0.434726	12	1.99326	49	1.7445	60	2.34944	49	3.10529	90	6.77587	121
ENSMUSG00000022661	Cd200	15.943	12.7084	20.2559	-1.65957	-0.730809	2.20318e-05	0.00583971	16	45382135	45409053	-1	protein_coding	CD200 antigen [Source:MGI Symbol;Acc:MGI:1196990]	ENSMUST00000023341,ENSMUST00000163230,ENSMUST00000165910,ENSMUST00000166512,ENSMUST00000166630,ENSMUST00000167355,ENSMUST00000167552,ENSMUST00000171328,ENSMUST00000171855,ENSMUST00000172091,ENSMUST00000172297	14.4876	413	10.361	286	12.6104	310	13.3745	460	23.2547	485	16.0095	464	21.5036	384
ENSMUSG00000034220	Gpc1	149.948	120.745	188.885	-1.54363	-0.626324	2.25272e-05	0.00583971	1	92831645	92860779	1	protein_coding	glypican 1 [Source:MGI Symbol;Acc:MGI:1194891]	ENSMUST00000045970,ENSMUST00000190215,ENSMUST00000190586,ENSMUST00000190677,ENSMUST00000191373	118.847	3388	104.407	2882	136.07	3345	123.656	4253	229.862	4794	154.126	4467	182.669	3262
ENSMUSG00000041324	Inhba	107.328	92.1649	127.546	-1.44732	-0.533382	2.25946e-05	0.00583971	13	16011851	16031621	1	protein_coding	inhibin beta-A [Source:MGI Symbol;Acc:MGI:96570]	ENSMUST00000042603,ENSMUST00000164993	102.395	2919	70.8966	1957	97.5883	2399	97.7794	3363	140.583	2932	118.243	3427	123.814	2211
ENSMUSG00000115302	Gm49394	7.19465	4.94523	10.1939	-1.96462	-0.974248	2.44473e-05	0.00620961	7	142650769	142669942	-1	protein_coding	predicted gene, 49394 [Source:MGI Symbol;Acc:MGI:6121625]	ENSMUST00000228850	4.59533	131	4.56463	126	4.71874	116	5.90224	203	13.6651	285	7.4527	216	9.46382	169
ENSMUSG00000002985	Apoe	153.033	129.837	183.96	-1.4191	-0.504972	2.55446e-05	0.00637835	7	19696109	19699188	-1	protein_coding	apolipoprotein E [Source:MGI Symbol;Acc:MGI:88057]	ENSMUST00000003066,ENSMUST00000167646,ENSMUST00000172808,ENSMUST00000172983,ENSMUST00000173739,ENSMUST00000174064,ENSMUST00000174144,ENSMUST00000174191,ENSMUST00000174355,ENSMUST00000174710,ENSMUST00000207525	128.775	3671	148.169	4090	132.328	3253	110.078	3786	181.626	3788	168.824	4893	201.428	3597
ENSMUSG00000059013	Sh2d3c	48.127	42.8109	55.2152	-1.33293	-0.414603	2.88827e-05	0.00709167	2	32721055	32755512	1	protein_coding	SH2 domain containing 3C [Source:MGI Symbol;Acc:MGI:1351631]	ENSMUST00000074248,ENSMUST00000113242,ENSMUST00000124133,ENSMUST00000131101,ENSMUST00000139563,ENSMUST00000141670	46.8303	1335	38.9442	1075	44.706	1099	40.7632	1402	54.3249	1133	55.3777	1605	55.9429	999
ENSMUSG00000078897	Gm4724	4.97658	3.84665	6.48316	-2.01062	-1.00764	3.37273e-05	0.00814541	2	175422300	175435807	-1	protein_coding	predicted gene 4724 [Source:MGI Symbol;Acc:MGI:3782904]	ENSMUST00000109045,ENSMUST00000109046,ENSMUST00000152941,ENSMUST00000153210	5.4723	156	3.3329	92	1.87122	46	4.71016	162	5.37015	112	5.17548	150	8.90383	159
ENSMUSG00000026479	Lamc2	40.2424	44.9486	33.9673	1.35573	0.439073	4.07455e-05	0.00962524	1	153122756	153186447	-1	protein_coding	laminin, gamma 2 [Source:MGI Symbol;Acc:MGI:99913]	ENSMUST00000027753,ENSMUST00000185328,ENSMUST00000185356,ENSMUST00000188206,ENSMUST00000188831,ENSMUST00000189005	41.8842	1194	44.487	1228	45.8856	1128	47.5377	1635	37.0637	773	31.743	920	33.0954	591
ENSMUSG00000021631	Mrps36-ps1	1.89436	1.45665	2.47797	-2.62819	-1.39407	4.11614e-05	0.00962524	17	53866715	53867020	-1	processed_pseudogene	mitichondrial ribosomal protein S36, pseudogene 1 [Source:MGI Symbol;Acc:MGI:3809201]	ENSMUST00000061311	3.01678	86	1.30418	36	0.691539	17	0.814101	28	3.40429	71	1.62165	47	2.40795	43
ENSMUSG00000101932	Gm10074	1.62525	2.22841	0.821049	3.82069	1.93383	4.35516e-05	0.010025	17	36226023	36226271	1	processed_pseudogene	predicted gene 10074 [Source:MGI Symbol;Acc:MGI:3708632]	ENSMUST00000174543	1.22776	35	2.68081	74	2.56276	63	2.4423	84	1.72612	36	0.345032	10	0.391993	7
ENSMUSG00000097154	Gm26510	7.78737	5.5909	10.716	-1.84362	-0.882539	4.85949e-05	0.0109068	17	70874349	70924996	-1	lncRNA	predicted gene, 26510 [Source:MGI Symbol;Acc:MGI:5477004]	ENSMUST00000180468,ENSMUST00000189974	5.26183	150	5.14426	142	6.14249	151	5.81501	200	10.5485	220	7.93574	230	13.6637	244
ENSMUSG00000038370	Pcp4l1	24.3712	27.7162	19.9112	1.44401	0.530085	4.88628e-05	0.0109068	1	171173262	171196268	-1	protein_coding	Purkinje cell protein 4-like 1 [Source:MGI Symbol;Acc:MGI:1913675]	ENSMUST00000111332	24.3097	693	30.612	845	31.404	772	24.5393	844	18.3161	382	20.978	608	20.4396	365
ENSMUSG00000082095	Gm11991	14.7769	11.0618	19.7302	-1.66891	-0.738905	6.35933e-05	0.0139829	11	8884223	8885296	-1	processed_pseudogene	predicted gene 11991 [Source:MGI Symbol;Acc:MGI:3651121]	ENSMUST00000119652	9.75193	278	9.67266	267	11.3901	280	13.4327	462	20.234	422	12.9732	376	25.9835	464
ENSMUSG00000022122	Ednrb	28.262	16.6253	43.7775	-2.30192	-1.20284	6.73075e-05	0.014582	14	103814625	103844402	-1	protein_coding	endothelin receptor type B [Source:MGI Symbol;Acc:MGI:102720]	ENSMUST00000022718,ENSMUST00000172237,ENSMUST00000227824	18.6269	531	17.2441	476	14.1155	347	16.5146	568	22.4875	469	81.0136	2348	27.8315	497
ENSMUSG00000051118	Olfr77	24.5769	19.2195	31.7201	-1.54533	-0.627918	6.91564e-05	0.0147654	9	19916865	19929124	1	protein_coding	olfactory receptor 77 [Source:MGI Symbol;Acc:MGI:2153206]	ENSMUST00000057596,ENSMUST00000217347	16.7677	478	19.128	528	20.7462	510	20.2362	696	32.125	670	22.7721	660	40.2632	719
ENSMUSG00000027750	Postn	641.438	553.634	758.51	-1.50514	-0.589895	7.59128e-05	0.0159764	3	54361109	54391037	1	protein_coding	periostin, osteoblast specific factor [Source:MGI Symbol;Acc:MGI:1926321]	ENSMUST00000073012,ENSMUST00000081564,ENSMUST00000107985,ENSMUST00000117373,ENSMUST00000127452,ENSMUST00000143258,ENSMUST00000145036,ENSMUST00000150868,ENSMUST00000154157	702.279	20020	424.22	11710	554.858	13640	533.178	18338	826.716	17242	639.966	18548	808.849	14444
ENSMUSG00000090136	Gm10177	8.97646	10.9967	6.28279	1.63997	0.713668	7.71071e-05	0.0159992	9	37252922	37253365	1	transcribed_processed_pseudogene	predicted gene 10177 [Source:MGI Symbol;Acc:MGI:3704330]	ENSMUST00000160052,ENSMUST00000161698	13.0143	371	9.70889	268	11.7562	289	9.50754	327	6.5209	136	6.27959	182	6.04789	108
ENSMUSG00000105361	AY036118	1.52804	0.446099	2.97063	-9.59212	-3.26185	7.97627e-05	0.0163203	17	39847113	39848035	-1	lncRNA	cDNA sequence AY036118 [Source:MGI Symbol;Acc:MGI:2158419]	ENSMUST00000200021	0.63142	18	0.217363	6	0.935611	23	0	0	1.15075	24	2.55324	74	5.2079	93
ENSMUSG00000048502	Duxbl1	2.32349	3.08626	1.30647	3.36136	1.74905	8.10911e-05	0.0163648	14	25978577	25990088	1	protein_coding	double homeobox B-like 1 [Source:MGI Symbol;Acc:MGI:1916048]	ENSMUST00000049793,ENSMUST00000172465,ENSMUST00000172667,ENSMUST00000173155,ENSMUST00000173580,ENSMUST00000174383	1.75394	50	4.05745	112	3.74245	92	2.7912	96	0.767165	16	2.76026	80	0.391993	7
ENSMUSG00000031557	Plekha2	80.4981	86.2248	72.8624	1.2664	0.340729	8.3751e-05	0.0166732	8	25039144	25102376	-1	protein_coding	pleckstrin homology domain-containing, family A (phosphoinositide binding specific) member 2 [Source:MGI Symbol;Acc:MGI:1928144]	ENSMUST00000064883,ENSMUST00000098866,ENSMUST00000125466,ENSMUST00000128715,ENSMUST00000211708	68.8949	1964	97.0164	2678	86.8491	2135	92.1388	3169	80.888	1687	64.9006	1881	72.7986	1300
ENSMUSG00000060780	Lrrtm1	1.57927	0.952623	2.41479	-2.70667	-1.43652	8.56509e-05	0.0168241	6	77242689	77257791	1	protein_coding	leucine rich repeat transmembrane neuronal 1 [Source:MGI Symbol;Acc:MGI:2389173]	ENSMUST00000020400,ENSMUST00000159616,ENSMUST00000161677,ENSMUST00000161811	1.12252	32	0.688317	19	1.09833	27	0.901327	31	2.58918	54	2.41523	70	2.23996	40
ENSMUSG00000020902	Ntn1	10.4908	5.60335	17.0074	-2.87235	-1.52223	9.25905e-05	0.0179479	11	68209364	68400823	-1	protein_coding	netrin 1 [Source:MGI Symbol;Acc:MGI:105088]	ENSMUST00000021284,ENSMUST00000108674,ENSMUST00000135141	7.26133	207	6.62958	183	3.57973	88	4.94276	170	8.67855	181	31.5359	914	10.8078	193
ENSMUSG00000032332	Col12a1	185.279	217.478	142.347	1.38707	0.472042	9.55319e-05	0.0182776	9	79598991	79718831	-1	protein_coding	collagen, type XII, alpha 1 [Source:MGI Symbol;Acc:MGI:88448]	ENSMUST00000071750,ENSMUST00000121227,ENSMUST00000122827,ENSMUST00000135009,ENSMUST00000141667,ENSMUST00000150289	266.249	7590	148.894	4110	241.795	5944	212.975	7325	137.754	2873	148.226	4296	141.061	2519
ENSMUSG00000044337	Ackr3	59.95	54.3828	67.3728	-1.26964	-0.344418	0.000103979	0.0196388	1	90203980	90216751	1	protein_coding	atypical chemokine receptor 3 [Source:MGI Symbol;Acc:MGI:109562]	ENSMUST00000065587,ENSMUST00000159654	58.1257	1657	49.3777	1363	50.4823	1241	59.5457	2048	63.1952	1318	65.4526	1897	73.4706	1312
ENSMUSG00000051639	Gm5812	2.86078	4.25118	1.0069	9.11041	3.18752	0.000113846	0.0212301	17	6121208	6122164	-1	processed_pseudogene	predicted gene 5812 [Source:MGI Symbol;Acc:MGI:3644887]	ENSMUST00000061073	3.89376	111	7.35412	203	0	0	5.75686	198	3.02071	63	0	0	0	0
ENSMUSG00000091989	Ndufab1-ps	2.72327	3.93784	1.10383	3.34247	1.74091	0.000123933	0.0226472	7	80507787	80508254	1	processed_pseudogene	NADH:ubiquinone oxidoreductase subunit AB1b [Source:MGI Symbol;Acc:MGI:4936891]	ENSMUST00000166096	6.3142	180	2.60836	72	5.89842	145	0.930402	32	1.96586	41	1.34563	39	0	0
ENSMUSG00000005836	Gata6	252.206	226.709	286.203	-1.341	-0.423307	0.00012592	0.0226472	18	11052064	11085635	1	protein_coding	GATA binding protein 6 [Source:MGI Symbol;Acc:MGI:107516]	ENSMUST00000047762,ENSMUST00000231831,ENSMUST00000234512,ENSMUST00000234722,ENSMUST00000234971,ENSMUST00000235081	268.424	7652	202.8	5598	218.77	5378	216.842	7458	315.305	6576	257.429	7461	285.875	5105
ENSMUSG00000062554	Gm12751	1.12345	0.377663	2.11784	-6.60293	-2.72311	0.000126057	0.0226472	4	34354043	34354423	1	processed_pseudogene	predicted gene 12751 [Source:MGI Symbol;Acc:MGI:3651049]	ENSMUST00000122336	0.140315	4	0.434726	12	0.935611	23	0	0	1.96586	41	2.03569	59	2.35196	42
ENSMUSG00000098001	Gm27048	7.98378	5.6818	11.0531	-1.80155	-0.849238	0.000129598	0.0230029	8	80933534	80938667	-1	lncRNA	predicted gene, 27048 [Source:MGI Symbol;Acc:MGI:5504163]	ENSMUST00000182891	4.59533	131	5.18049	143	6.87471	169	6.07669	209	10.7883	225	8.31528	241	14.0557	251
ENSMUSG00000072676	Tmem254a	2.22268	1.57223	3.08996	-2.42761	-1.27953	0.000135425	0.0237511	14	25923300	25927672	-1	protein_coding	transmembrane protein 254a [Source:MGI Symbol;Acc:MGI:1196450]	ENSMUST00000100811,ENSMUST00000100813,ENSMUST00000184129,ENSMUST00000185006	2.4906	71	1.15927	32	1.50511	37	1.13393	39	3.02071	63	2.55324	74	3.69593	66
ENSMUSG00000108443	Gm44510	13.6623	10.2755	18.1779	-1.63438	-0.708744	0.000138881	0.0240706	7	56012948	56017479	-1	TEC	predicted gene 44510 [Source:MGI Symbol;Acc:MGI:5753086]	ENSMUST00000206288	8.6294	246	8.58584	237	10.8612	267	13.0256	448	16.9735	354	12.2486	355	25.3115	452
ENSMUSG00000052305	Hbb-bs	39.5904	42.193	36.1201	1.32005	0.400593	0.000143545	0.0245895	7	103826534	103828096	-1	protein_coding	hemoglobin, beta adult s chain [Source:MGI Symbol;Acc:MGI:5474852]	ENSMUST00000023934,ENSMUST00000131960,ENSMUST00000153218	25.3269	722	27.4964	759	31.0786	764	84.8701	2919	22.4396	468	22.0821	640	63.8388	1140
ENSMUSG00000116275	Zc3h11a	97.1642	85.2102	113.103	-1.8102	-0.85615	0.000160871	0.0272408	1	133619871	133661380	-1	protein_coding	zinc finger CCCH type containing 11A [Source:MGI Symbol;Acc:MGI:1917829]	ENSMUST00000027736	132.423	3775	45.3202	1251	38.2787	941	124.819	4293	74.0794	1545	134.08	3886	131.15	2342
ENSMUSG00000001348	Acp5	13.0981	14.6293	11.0565	1.53092	0.614403	0.000162983	0.0272848	9	22126727	22135711	-1	protein_coding	acid phosphatase 5, tartrate resistant [Source:MGI Symbol;Acc:MGI:87883]	ENSMUST00000069330,ENSMUST00000115315,ENSMUST00000165735,ENSMUST00000213815,ENSMUST00000216684,ENSMUST00000217643	8.69956	248	13.0418	360	15.1732	373	21.6028	743	9.11008	190	8.21177	238	15.8477	283
ENSMUSG00000024500	Ppp2r2b	1.68241	2.30797	0.848335	2.52057	1.33375	0.000166195	0.02751	18	42637432	43083127	-1	protein_coding	protein phosphatase 2, regulatory subunit B, beta [Source:MGI Symbol;Acc:MGI:1920180]	ENSMUST00000025377,ENSMUST00000117687,ENSMUST00000120632,ENSMUST00000136118,ENSMUST00000153737,ENSMUST00000155262,ENSMUST00000236238,ENSMUST00000239360	2.73615	78	2.71704	75	1.62715	40	2.15155	74	0.958956	20	0.690065	20	0.895983	16
ENSMUSG00000111868	Gm47398	16.5461	13.1516	21.072	-1.5219	-0.605876	0.000177973	0.0291323	10	44851393	44866786	-1	lncRNA	predicted gene, 47398 [Source:MGI Symbol;Acc:MGI:6096325]	ENSMUST00000214570,ENSMUST00000215415	11.8216	337	13.1142	362	13.6274	335	14.0432	483	21.1929	442	15.8715	460	26.1515	467
ENSMUSG00000089739	Gm20431	37.3401	33.3988	42.5952	-1.37779	-0.462354	0.000188021	0.0304387	2	167607850	167661496	-1	protein_coding	predicted gene 20431 [Source:MGI Symbol;Acc:MGI:5141896]	ENSMUST00000125544	40.4109	1152	25.1054	693	40.7194	1001	27.3596	941	42.5297	887	52.2724	1515	32.9834	589
ENSMUSG00000073411	H2-D1	16.7299	19.0791	13.5978	1.44729	0.533349	0.000198229	0.0317425	17	35262730	35267499	1	protein_coding	histocompatibility 2, D region locus 1 [Source:MGI Symbol;Acc:MGI:95896]	ENSMUST00000172503,ENSMUST00000172785,ENSMUST00000174325	17.5044	499	19.7076	544	20.3801	501	18.7243	644	15.0077	313	14.2498	413	11.5358	206
ENSMUSG00000021950	Anxa8	1.71007	2.25208	0.987379	2.41349	1.27112	0.000215038	0.0338361	14	34085981	34100571	1	protein_coding	annexin A8 [Source:MGI Symbol;Acc:MGI:1201374]	ENSMUST00000022519,ENSMUST00000120077	1.85918	53	2.31854	64	2.56276	63	2.26785	78	0.863061	18	1.0351	30	1.06398	19
ENSMUSG00000039116	Adgrg6	48.352	41.3472	57.6916	-1.3788	-0.463418	0.000215897	0.0338361	10	14402583	14545659	-1	protein_coding	adhesion G protein-coupled receptor G6 [Source:MGI Symbol;Acc:MGI:1916151]	ENSMUST00000041168,ENSMUST00000207953,ENSMUST00000208429,ENSMUST00000208905,ENSMUST00000238680	41.9193	1195	38.0748	1051	42.7127	1050	42.6822	1468	53.0303	1106	73.7334	2137	46.3111	827
ENSMUSG00000096718	Zfp781	3.57509	4.55474	2.26889	2.74798	1.45837	0.00022503	0.0348962	10	81901911	81930480	-1	protein_coding	zinc finger protein 781 [Source:MGI Symbol;Acc:MGI:3696710]	ENSMUST00000076281,ENSMUST00000219144	2.77123	79	5.39785	149	6.58996	162	3.45993	119	0.671269	14	4.62343	134	1.51197	27
ENSMUSG00000089659	Gm3470	1.07383	0.502175	1.83604	-3.23678	-1.69456	0.000238984	0.036535	5	99021803	99022222	-1	processed_pseudogene	predicted gene 3470 [Source:MGI Symbol;Acc:MGI:3781646]	ENSMUST00000160819	0.175394	5	0.217363	6	0.97629	24	0.639651	22	1.86996	39	2.07019	60	1.56797	28
ENSMUSG00000097346	Rps18-ps4	18.2704	14.1996	23.6982	-1.54112	-0.623983	0.000242963	0.036535	13	97751112	97760965	1	lncRNA	ribosomal protein S18, pseudogene 4 [Source:MGI Symbol;Acc:MGI:5477113]	ENSMUST00000180396	11.6462	332	15.3603	424	15.4579	380	14.334	493	22.4396	468	18.0797	524	30.5754	546
ENSMUSG00000055609	Hba-x	960.171	1049.38	841.223	1.4927	0.577927	0.000243037	0.036535	11	32276400	32278116	1	protein_coding	hemoglobin X, alpha-like embryonic chain in Hba complex [Source:MGI Symbol;Acc:MGI:96019]	ENSMUST00000020531,ENSMUST00000145569	617.634	17607	970.055	26777	1065.66	26197	1544.18	53110	703.586	14674	526.45	15258	1293.63	23101
ENSMUSG00000115610	Gm31251	19.0649	15.6129	23.6676	-1.41356	-0.499334	0.000267176	0.0397579	14	54979393	54991601	1	lncRNA	predicted gene, 31251 [Source:MGI Symbol;Acc:MGI:5590410]	ENSMUST00000228715	12.4179	354	16.3747	452	15.4579	380	18.201	626	24.3095	507	20.1499	584	26.5435	474
ENSMUSG00000097961	Gm27000	49.1861	54.6258	41.9332	1.40584	0.491437	0.000270558	0.0398585	X	88759471	88760312	-1	lncRNA	predicted gene, 27000 [Source:MGI Symbol;Acc:MGI:5504115]	ENSMUST00000182943	41.2528	1176	68.3969	1888	59.1062	1453	49.7474	1711	35.3375	737	47.5109	1377	42.9512	767
ENSMUSG00000036826	Igflr1	0.887147	0.543807	1.34493	-12.1524	-3.60317	0.000273579	0.0399046	7	30565427	30567962	1	protein_coding	IGF-like family receptor 1 [Source:MGI Symbol;Acc:MGI:3655979]	ENSMUST00000043850,ENSMUST00000172251	1.1576	33	0	0	0	0	1.01763	35	1.1987	25	1.38013	40	1.45597	26
ENSMUSG00000019989	Enpp3	4.44662	3.54009	5.65533	-1.82458	-0.867565	0.000283739	0.0408407	10	24772406	24842823	-1	protein_coding	ectonucleotide pyrophosphatase/phosphodiesterase 3 [Source:MGI Symbol;Acc:MGI:2143702]	ENSMUST00000020169,ENSMUST00000217903,ENSMUST00000218044,ENSMUST00000218343,ENSMUST00000218619,ENSMUST00000219342,ENSMUST00000219861,ENSMUST00000219968,ENSMUST00000220209	4.80581	137	2.5359	70	3.62041	89	3.19826	110	5.46605	114	5.90005	171	5.59989	100
ENSMUSG00000043099	Hic1	16.9753	14.3037	20.5375	-1.4777	-0.563357	0.000289366	0.0408407	11	75164565	75169519	-1	protein_coding	hypermethylated in cancer 1 [Source:MGI Symbol;Acc:MGI:1338010]	ENSMUST00000055619,ENSMUST00000131720	15.0138	428	13.0056	359	11.8375	291	17.3578	597	20.6176	430	20.6674	599	20.3276	363
ENSMUSG00000029313	Aff1	60.0131	65.2696	53.0043	1.26641	0.340746	0.000289916	0.0408407	5	103692374	103855322	1	protein_coding	AF4/FMR2 family, member 1 [Source:MGI Symbol;Acc:MGI:1100819]	ENSMUST00000031256,ENSMUST00000054979,ENSMUST00000126335,ENSMUST00000152145,ENSMUST00000153165	60.1603	1715	64.1221	1770	65.9403	1621	70.8559	2437	55.6195	1160	47.3384	1372	56.0549	1001
ENSMUSG00000002266	Zim1	174.264	192.363	150.132	1.26573	0.339967	0.000291086	0.0408407	7	6671269	6696450	-1	protein_coding	zinc finger, imprinted 1 [Source:MGI Symbol;Acc:MGI:1341879]	ENSMUST00000002336,ENSMUST00000122432,ENSMUST00000203908,ENSMUST00000213399	199.423	5685	190.12	5248	187.285	4604	192.622	6625	150.7	3143	146.708	4252	152.989	2732
ENSMUSG00000042812	Foxf1	1.5682	2.22528	0.692104	2.75635	1.46276	0.000296398	0.0411937	8	121084386	121088144	1	protein_coding	forkhead box F1 [Source:MGI Symbol;Acc:MGI:1347470]	ENSMUST00000181504	2.9817	85	1.30418	36	2.92887	72	1.68635	58	0.671269	14	0.621058	18	0.783985	14
ENSMUSG00000025608	Podxl	184.412	201.862	161.146	1.28397	0.360608	0.000302076	0.0415766	6	31519488	31563981	-1	protein_coding	podocalyxin-like [Source:MGI Symbol;Acc:MGI:1351317]	ENSMUST00000026698,ENSMUST00000136877	185.602	5291	208.741	5762	188.994	4646	224.11	7708	152.618	3183	164.166	4758	166.653	2976
ENSMUSG00000037335	Hand1	74.9239	83.7053	63.2152	1.30032	0.378863	0.000304797	0.0415766	11	57828705	57832818	-1	protein_coding	heart and neural crest derivatives expressed 1 [Source:MGI Symbol;Acc:MGI:103577]	ENSMUST00000036917,ENSMUST00000108845,ENSMUST00000160392	89.5213	2552	79.8447	2204	88.639	2179	76.8163	2642	74.0794	1545	57.5514	1668	58.0149	1036
ENSMUSG00000098022	Zfp82	1.88866	1.01794	3.04963	-2.85091	-1.51142	0.000320367	0.043073	7	30054489	30072900	-1	protein_coding	zinc finger protein 82 [Source:MGI Symbol;Acc:MGI:1890753]	ENSMUST00000080834,ENSMUST00000182483,ENSMUST00000182546,ENSMUST00000182919,ENSMUST00000183025,ENSMUST00000183115,ENSMUST00000183190	1.05237	30	0.688317	19	1.13901	28	1.19208	41	3.83582	80	1.44914	42	3.86393	69
ENSMUSG00000018166	Erbb3	72.5435	63.6532	84.3972	-1.35751	-0.440959	0.000321615	0.043073	10	128567523	128589652	-1	protein_coding	erb-b2 receptor tyrosine kinase 3 [Source:MGI Symbol;Acc:MGI:95411]	ENSMUST00000082059	70.5085	2010	58.036	1602	64.9233	1596	61.1448	2103	104.239	2174	70.3866	2040	78.5665	1403
ENSMUSG00000115018	Ndor1	1.73465	1.45689	2.10499	-14.9981	-3.90671	0.000341774	0.0453605	2	25244819	25246863	-1	protein_coding	NADPH dependent diflavin oxidoreductase 1 [Source:MGI Symbol;Acc:MGI:1926047]	ENSMUST00000228627	3.47281	99	2.35477	65	0	0	0	0	2.82892	59	0.96609	28	2.51995	45
ENSMUSG00000025969	Nrp2	87.6875	97.6472	74.408	1.26032	0.333795	0.0003469	0.0456297	1	62703285	62818695	1	protein_coding	neuropilin 2 [Source:MGI Symbol;Acc:MGI:1100492]	ENSMUST00000027112,ENSMUST00000063594,ENSMUST00000075144,ENSMUST00000102822,ENSMUST00000114155,ENSMUST00000114157,ENSMUST00000126344	109.657	3126	90.7129	2504	91.7713	2256	98.4481	3386	71.1546	1484	82.4627	2390	69.6067	1243
ENSMUSG00000028883	Sema3a	29.6677	25.7762	34.8565	-1.39143	-0.476564	0.000356294	0.0464506	5	13125414	13602565	1	protein_coding	sema domain, immunoglobulin domain (Ig), short basic domain, secreted, (semaphorin) 3A [Source:MGI Symbol;Acc:MGI:107558]	ENSMUST00000030714,ENSMUST00000095012,ENSMUST00000125629,ENSMUST00000137798,ENSMUST00000141968,ENSMUST00000195907,ENSMUST00000196514,ENSMUST00000197582,ENSMUST00000200073	28.9751	826	24.7069	682	25.6683	631	23.7543	817	27.9056	582	43.2325	1253	33.4314	597
ENSMUSG00000021573	Tppp	10.3445	12.1159	7.98262	1.53078	0.614266	0.000375071	0.0484698	13	74009407	74035753	1	protein_coding	tubulin polymerization promoting protein [Source:MGI Symbol;Acc:MGI:1920198]	ENSMUST00000022057,ENSMUST00000140217	11.8216	337	11.7738	325	12.9765	319	11.8917	409	8.48676	177	7.90124	229	7.55986	135
ENSMUSG00000023886	Smoc2	30.1933	28.3227	32.6875	-1.37767	-0.462231	0.000392203	0.0502429	17	14279506	14404790	1	protein_coding	SPARC related modular calcium binding 2 [Source:MGI Symbol;Acc:MGI:1929881]	ENSMUST00000024660,ENSMUST00000232923,ENSMUST00000232936,ENSMUST00000233344,ENSMUST00000233526,ENSMUST00000233540,ENSMUST00000233686	43.0769	1228	20.9393	578	20.4614	503	28.8134	991	23.3026	486	32.5365	943	42.2232	754
ENSMUSG00000044734	Serpinb1a	4.74066	5.75321	3.3906	1.74779	0.80553	0.000423482	0.0537822	13	32842092	32851185	-1	protein_coding	serine (or cysteine) peptidase inhibitor, clade B, member 1a [Source:MGI Symbol;Acc:MGI:1913472]	ENSMUST00000076352,ENSMUST00000091668,ENSMUST00000221967,ENSMUST00000223016	5.29691	151	5.54276	153	5.3696	132	6.80356	234	3.11661	65	2.96728	86	4.08792	73
ENSMUSG00000059921	Unc5c	109.231	126.153	86.6679	1.23156	0.300488	0.00043176	0.0543648	3	141465216	141834924	1	protein_coding	unc-5 netrin receptor C [Source:MGI Symbol;Acc:MGI:1095412]	ENSMUST00000075282,ENSMUST00000106236,ENSMUST00000123631,ENSMUST00000130636,ENSMUST00000142762,ENSMUST00000151007,ENSMUST00000155416,ENSMUST00000200114	184.269	5253	90.3868	2495	117.114	2879	112.84	3881	73.9355	1542	95.5739	2770	90.4943	1616
ENSMUSG00000032420	Nt5e	9.50925	7.9946	11.5288	-1.50862	-0.593227	0.00044578	0.0556545	9	88327197	88372092	1	protein_coding	5' nucleotidase, ecto [Source:MGI Symbol;Acc:MGI:99782]	ENSMUST00000034992,ENSMUST00000186789,ENSMUST00000187166,ENSMUST00000217134	9.05035	258	8.29603	229	6.75267	166	7.87934	271	11.7952	246	10.2475	297	12.5438	224
ENSMUSG00000025475	Adgra1	2.10636	2.79254	1.19144	2.29153	1.19631	0.000484668	0.0596238	7	139834174	139878088	1	protein_coding	adhesion G protein-coupled receptor A1 [Source:MGI Symbol;Acc:MGI:1277167]	ENSMUST00000026548,ENSMUST00000129454,ENSMUST00000137584	3.05186	87	2.75327	76	3.41702	84	1.94803	67	1.63023	34	1.1041	32	0.839984	15
ENSMUSG00000028644	Ermap	15.2236	16.7631	13.1709	1.49647	0.581561	0.000487079	0.0596238	4	119175457	119190011	-1	protein_coding	erythroblast membrane-associated protein [Source:MGI Symbol;Acc:MGI:1349816]	ENSMUST00000030396,ENSMUST00000124626,ENSMUST00000127574,ENSMUST00000133956,ENSMUST00000137080,ENSMUST00000138395,ENSMUST00000141227,ENSMUST00000150864,ENSMUST00000156746,ENSMUST00000239029	11.6813	333	13.9837	386	14.7257	362	26.6618	917	8.96624	187	7.86674	228	22.6796	405
ENSMUSG00000019997	Ccn2	139.636	123.723	160.853	-1.30649	-0.385694	0.000490767	0.0596238	10	24595442	24598683	1	protein_coding	cellular communication network factor 2 [Source:MGI Symbol;Acc:MGI:95537]	ENSMUST00000020171,ENSMUST00000129142,ENSMUST00000176228	127.406	3632	97.3062	2686	140.911	3464	129.268	4446	140.727	2935	204.915	5939	136.917	2445
ENSMUSG00000038349	Plcl1	9.20624	7.95481	10.8748	-1.52466	-0.608483	0.000493762	0.0596238	1	55405921	55754285	1	protein_coding	phospholipase C-like 1 [Source:MGI Symbol;Acc:MGI:3036262]	ENSMUST00000042986,ENSMUST00000187059	10.3483	295	6.62958	183	6.67132	164	8.17009	281	10.4526	218	10.972	318	11.1998	200
ENSMUSG00000032243	Itga11	5.62225	7.00402	3.77989	1.67926	0.747827	0.000515532	0.0617465	9	62677826	62783982	1	protein_coding	integrin alpha 11 [Source:MGI Symbol;Acc:MGI:2442114]	ENSMUST00000034774,ENSMUST00000159012	8.94511	255	6.04994	167	7.11878	175	5.90224	203	3.78788	79	3.96787	115	3.58393	64
ENSMUSG00000033420	Antxr1	90.4673	84.7374	98.1071	-1.28197	-0.35836	0.000524031	0.0622583	6	87133853	87335821	-1	protein_coding	anthrax toxin receptor 1 [Source:MGI Symbol;Acc:MGI:1916788]	ENSMUST00000042025,ENSMUST00000203131,ENSMUST00000203563,ENSMUST00000204805,ENSMUST00000205033,ENSMUST00000205089	108.709	3099	66.5131	1836	81.7643	2010	81.9626	2819	104.814	2186	93.4692	2709	96.0382	1715
ENSMUSG00000083287	Gm13502	2.52304	3.3348	1.44071	2.59597	1.37628	0.000537948	0.0634004	2	53696121	53696804	-1	processed_pseudogene	predicted gene 13502 [Source:MGI Symbol;Acc:MGI:3649894]	ENSMUST00000121574	3.26234	93	3.84008	106	4.23059	104	2.00618	69	0.575374	12	2.79476	81	0.951982	17
ENSMUSG00000029193	Cckar	3.98202	5.11388	2.47288	1.83024	0.872032	0.000555404	0.0649382	5	53697776	53707705	-1	protein_coding	cholecystokinin A receptor [Source:MGI Symbol;Acc:MGI:99478]	ENSMUST00000031093,ENSMUST00000200691,ENSMUST00000202946	6.84038	195	4.38349	121	4.0272	99	5.20443	179	2.78097	58	2.1737	63	2.46395	44
ENSMUSG00000022362	Gm29394	1.13982	1.51995	0.632984	2.6341	1.39731	0.000592367	0.0687146	15	58028243	58076425	-1	protein_coding	predicted gene 29394 [Source:MGI Symbol;Acc:MGI:5580100]	ENSMUST00000176076,ENSMUST00000176935,ENSMUST00000177176,ENSMUST00000177504	1.12252	32	1.37663	38	2.15597	53	1.42468	49	0.575374	12	0.931587	27	0.391993	7
ENSMUSG00000078184	Rbm8a2	1.26793	1.79368	0.566927	3.39387	1.76293	0.000600544	0.0690144	1	175977777	175979114	-1	protein_coding	RNA binding motif protein 8A2 [Source:MGI Symbol;Acc:MGI:3612447]	ENSMUST00000104983	1.01729	29	3.15177	87	1.05765	26	1.94803	67	0.239739	5	0.621058	18	0.839984	15
ENSMUSG00000079297	Gm2223	4.0291	5.17051	2.50723	30.1675	4.91492	0.000604321	0.0690144	X	33505661	33507010	1	processed_pseudogene	predicted pseudogene 2223 [Source:MGI Symbol;Acc:MGI:3780393]	ENSMUST00000112099	5.99849	171	3.7314	103	5.1662	127	5.78594	199	0	0	7.5217	218	0	0
ENSMUSG00000026430	Rassf5	61.2662	65.896	55.0931	1.24316	0.314006	0.000639458	0.0724653	1	131176410	131245258	-1	protein_coding	Ras association (RalGDS/AF-6) domain family member 5 [Source:MGI Symbol;Acc:MGI:1926375]	ENSMUST00000027688,ENSMUST00000068564,ENSMUST00000112442,ENSMUST00000124796,ENSMUST00000212202	57.9152	1651	70.6792	1951	72.2455	1776	62.744	2158	57.0579	1190	53.7905	1559	54.431	972
ENSMUSG00000031972	Acta1	377.871	404.638	342.182	1.28675	0.363729	0.000664414	0.0747187	8	123891769	123894751	-1	protein_coding	actin, alpha 1, skeletal muscle [Source:MGI Symbol;Acc:MGI:87902]	ENSMUST00000034453,ENSMUST00000212584	295.54	8425	484.394	13371	446.571	10978	392.048	13484	373.705	7794	330.23	9571	322.61	5761
ENSMUSG00000111497	Gm38431	8.0448	5.19539	11.844	-1.93019	-0.948746	0.000692593	0.0772976	9	21067514	21091997	-1	protein_coding	predicted gene, 38431 [Source:MGI Symbol;Acc:MGI:5621316]	ENSMUST00000217282,ENSMUST00000217359	2.9817	85	4.85444	134	7.15946	176	5.78594	199	14.5282	303	7.00415	203	13.9997	250
ENSMUSG00000113811	Gm47882	6.30002	4.7321	8.39059	-1.62955	-0.704469	0.000716103	0.0793206	13	13862534	13893979	1	lncRNA	predicted gene, 47882 [Source:MGI Symbol;Acc:MGI:6097109]	ENSMUST00000223012	3.6482	104	4.45594	123	5.12552	126	5.69871	196	7.52781	157	7.00415	203	10.6398	190
ENSMUSG00000047759	Hs3st3a1	7.68541	6.21691	9.64341	-1.61607	-0.692486	0.000734709	0.0805998	11	64435332	64522841	1	protein_coding	heparan sulfate (glucosamine) 3-O-sulfotransferase 3A1 [Source:MGI Symbol;Acc:MGI:1333861]	ENSMUST00000058652	7.22625	206	5.90503	163	6.38656	157	5.34981	184	12.3226	257	8.48779	246	8.11985	145
ENSMUSG00000040605	Bace2	32.5599	29.0249	37.2732	-1.34675	-0.429482	0.000738595	0.0805998	16	97356742	97442936	1	protein_coding	beta-site APP-cleaving enzyme 2 [Source:MGI Symbol;Acc:MGI:1860440]	ENSMUST00000047275,ENSMUST00000231664,ENSMUST00000231783,ENSMUST00000231892	32.7987	935	23.5114	649	27.8649	685	31.9244	1098	34.6183	722	42.37	1228	34.8313	622
ENSMUSG00000027004	Frzb	46.5262	42.3686	52.0695	-1.35468	-0.437948	0.000774755	0.0824594	2	80411970	80447625	-1	protein_coding	frizzled-related protein [Source:MGI Symbol;Acc:MGI:892032]	ENSMUST00000028389,ENSMUST00000142459	52.0921	1485	29.0542	802	47.7975	1175	40.5306	1394	52.7905	1101	53.411	1548	50.0071	893
ENSMUSG00000020154	Ptprb	145.651	165.519	119.161	1.36808	0.452155	0.000777609	0.0824594	10	116275523	116389535	1	protein_coding	protein tyrosine phosphatase, receptor type, B [Source:MGI Symbol;Acc:MGI:97809]	ENSMUST00000092167,ENSMUST00000217925,ENSMUST00000218553,ENSMUST00000218601	169.115	4821	130.418	3600	186.553	4586	175.991	6053	132.432	2762	111.652	3236	113.398	2025
ENSMUSG00000028179	Cth	4.26504	3.29847	5.5538	-1.78116	-0.832816	0.00077793	0.0824594	3	157894248	157925077	-1	protein_coding	cystathionase (cystathionine gamma-lyase) [Source:MGI Symbol;Acc:MGI:1339968]	ENSMUST00000118539,ENSMUST00000125028,ENSMUST00000129805,ENSMUST00000198009	3.96391	113	2.9344	81	3.21362	79	3.08196	106	4.55504	95	5.10648	148	6.99987	125
ENSMUSG00000082806	Rpl13-ps1	11.7756	9.28792	15.0926	-1.49229	-0.577523	0.00077867	0.0824594	11	85111126	85111793	-1	processed_pseudogene	ribosomal protein L13, pseudogene 1 [Source:MGI Symbol;Acc:MGI:3649805]	ENSMUST00000121801	7.08593	202	9.0568	250	10.0477	247	10.9613	377	15.2474	318	12.1106	351	17.9197	320
ENSMUSG00000027832	Ptx3	13.1892	11.2622	15.7585	-1.43688	-0.522937	0.000783622	0.0824594	3	66219910	66225805	1	protein_coding	pentraxin related gene [Source:MGI Symbol;Acc:MGI:104641]	ENSMUST00000029421,ENSMUST00000182521	11.9619	341	9.16548	253	11.1867	275	12.7349	438	14.8159	309	15.4919	449	16.9677	303
ENSMUSG00000006262	Mob1b	144.076	155.899	128.313	1.23792	0.30792	0.000814857	0.0846359	5	88720855	88764220	1	protein_coding	MOB kinase activator 1B [Source:MGI Symbol;Acc:MGI:1915723]	ENSMUST00000006424,ENSMUST00000113229,ENSMUST00000125171,ENSMUST00000155298	147.121	4194	162.914	4497	155.596	3825	157.965	5433	128.165	2673	124.729	3615	132.046	2358
ENSMUSG00000026532	Spta1	13.973	15.4311	12.0288	1.47963	0.565232	0.000815796	0.0846359	1	174172776	174248450	1	protein_coding	spectrin alpha, erythrocytic 1 [Source:MGI Symbol;Acc:MGI:98385]	ENSMUST00000027817,ENSMUST00000156092	10.5587	301	14.5633	402	13.9528	343	22.6495	779	7.52781	157	9.79892	284	18.7596	335
ENSMUSG00000027570	Col9a3	83.3896	73.4429	96.652	-1.35404	-0.437267	0.000825543	0.0850482	2	180597790	180622189	1	protein_coding	collagen, type IX, alpha 3 [Source:MGI Symbol;Acc:MGI:894686]	ENSMUST00000103059,ENSMUST00000129090,ENSMUST00000132527,ENSMUST00000141056,ENSMUST00000165224,ENSMUST00000165879	81.3128	2318	61.876	1708	76.354	1877	74.2286	2553	112.917	2355	77.5287	2247	99.5101	1777
ENSMUSG00000080058	Gm11175	11.3954	9.05559	14.5151	-1.58452	-0.664042	0.000840473	0.0859851	8	70699162	70700080	-1	lncRNA	predicted gene 11175 [Source:MGI Symbol;Acc:MGI:3809055]	ENSMUST00000116172,ENSMUST00000211380	9.01527	257	7.8613	217	10.129	249	9.21679	317	16.3982	342	11.0755	321	16.0717	287
ENSMUSG00000007682	Dio2	7.97639	9.29637	6.21642	1.55024	0.632488	0.000874698	0.0888693	12	90724552	90738438	-1	protein_coding	deiodinase, iodothyronine, type II [Source:MGI Symbol;Acc:MGI:1338833]	ENSMUST00000082432	8.24354	235	8.87566	245	11.0239	271	9.04234	311	5.70579	119	6.27959	182	6.66387	119
ENSMUSG00000029335	Bmp3	1.09643	0.692731	1.63469	-2.64455	-1.40302	0.000884796	0.0892796	5	98854415	98884396	1	protein_coding	bone morphogenetic protein 3 [Source:MGI Symbol;Acc:MGI:88179]	ENSMUST00000031278,ENSMUST00000197143,ENSMUST00000200388	0.876972	25	0.434726	12	0.528824	13	0.930402	32	1.43843	30	1.89768	55	1.56797	28
ENSMUSG00000107770	Gm44126	0.850223	0.398652	1.45232	-8.33535	-3.05924	0.000909192	0.0911171	6	76284416	76284929	1	processed_pseudogene	predicted gene, 44126 [Source:MGI Symbol;Acc:MGI:5690518]	ENSMUST00000204831	0.245552	7	0	0	0.0406788	1	1.30838	45	1.91791	40	0.759071	22	1.67997	30
ENSMUSG00000109724	Gm18194	12.6823	10.2979	15.8615	-1.56337	-0.644659	0.000916149	0.091194	7	12795723	12799164	-1	transcribed_processed_pseudogene	predicted gene, 18194 [Source:MGI Symbol;Acc:MGI:5010379]	ENSMUST00000210455,ENSMUST00000210952	11.2954	322	8.2598	228	10.6172	261	11.0194	379	16.2543	339	11.2826	327	20.0476	358
ENSMUSG00000078878	Gm14305	9.35615	11.0481	7.10022	1.59534	0.673864	0.000957374	0.0943258	2	176708328	176721813	1	protein_coding	predicted gene 14305 [Source:MGI Symbol;Acc:MGI:3709632]	ENSMUST00000108980,ENSMUST00000108981,ENSMUST00000108983	9.89224	282	12.5346	346	9.03068	222	12.7349	438	6.42501	134	8.21177	238	6.66387	119
ENSMUSG00000010476	Ebf3	16.7568	19.9167	12.5436	1.57207	0.652668	0.000960417	0.0943258	7	137193673	137314445	-1	protein_coding	early B cell factor 3 [Source:MGI Symbol;Acc:MGI:894289]	ENSMUST00000033378,ENSMUST00000106118,ENSMUST00000168203,ENSMUST00000169486,ENSMUST00000209578,ENSMUST00000209864,ENSMUST00000209905,ENSMUST00000210774	19.2583	549	22.8231	630	13.424	330	24.1614	831	9.9252	207	13.1457	381	14.5597	260
ENSMUSG00000029859	Epha1	19.3707	16.2268	23.5625	-1.46685	-0.552724	0.000966982	0.0943416	6	42358487	42373268	-1	protein_coding	Eph receptor A1 [Source:MGI Symbol;Acc:MGI:107381]	ENSMUST00000073387,ENSMUST00000204238,ENSMUST00000204357	17.5044	499	14.7445	407	16.0274	394	16.6309	572	29.8235	622	19.0803	553	21.7836	389
ENSMUSG00000021379	Id4	17.3669	19.7724	14.1596	1.36424	0.448097	0.001093	0.105934	13	48261228	48266026	1	protein_coding	inhibitor of DNA binding 4 [Source:MGI Symbol;Acc:MGI:99414]	ENSMUST00000021810	21.1175	602	19.0193	525	20.6648	508	18.2882	629	13.6172	284	14.5259	421	14.3357	256
ENSMUSG00000044033	Ccdc141	225.883	243.557	202.319	1.25071	0.32275	0.00112881	0.108691	2	77009902	77170636	-1	protein_coding	coiled-coil domain containing 141 [Source:MGI Symbol;Acc:MGI:1919735]	ENSMUST00000028406,ENSMUST00000049544,ENSMUST00000111833,ENSMUST00000131660,ENSMUST00000133503,ENSMUST00000154013,ENSMUST00000164114,ENSMUST00000175840,ENSMUST00000179467,ENSMUST00000179868,ENSMUST00000180261	215.84	6153	254.061	7013	251.313	6178	253.011	8702	206.943	4316	210.849	6111	189.164	3378
ENSMUSG00000049265	Kcnk3	47.3931	51.8905	41.3965	1.28987	0.367224	0.00114834	0.109853	5	30588170	30625271	1	protein_coding	potassium channel, subfamily K, member 3 [Source:MGI Symbol;Acc:MGI:1100509]	ENSMUST00000066295,ENSMUST00000197428	47.8827	1365	57.8186	1596	55.2824	1359	46.5782	1602	37.0637	773	49.2706	1428	37.8553	676
ENSMUSG00000031762	Mt2	5.98509	6.99801	4.63453	1.72473	0.786369	0.00115708	0.109975	8	94172664	94173568	1	protein_coding	metallothionein 2 [Source:MGI Symbol;Acc:MGI:97172]	ENSMUST00000034214,ENSMUST00000212806	4.17439	119	5.97749	165	9.43747	232	8.40269	289	4.26736	89	3.58834	104	6.04789	108
ENSMUSG00000064293	Cntn4	6.13422	5.46277	7.02949	-1.59056	-0.669538	0.00119453	0.112807	6	105677660	106699310	1	protein_coding	contactin 4 [Source:MGI Symbol;Acc:MGI:1095737]	ENSMUST00000079416,ENSMUST00000089208,ENSMUST00000113258,ENSMUST00000113260,ENSMUST00000113261,ENSMUST00000113264,ENSMUST00000123596,ENSMUST00000125904,ENSMUST00000130040,ENSMUST00000132044,ENSMUST00000132395,ENSMUST00000142626,ENSMUST00000204621	8.6294	246	3.04308	84	5.41027	133	4.76831	164	4.79478	100	8.90183	258	7.39186	132
ENSMUSG00000054046	Klk13	1.53041	2.08713	0.78812	2.32227	1.21554	0.0012036	0.112939	7	43712567	43727534	1	protein_coding	kallikrein related-peptidase 13 [Source:MGI Symbol;Acc:MGI:3615275]	ENSMUST00000066834,ENSMUST00000205457,ENSMUST00000206554	2.9817	85	1.594	44	1.70851	42	2.06433	71	0.623322	13	0.621058	18	1.11998	20
ENSMUSG00000049336	Tenm2	9.91729	11.3102	8.06004	1.46913	0.554961	0.0012212	0.113865	11	36006656	37235964	-1	protein_coding	teneurin transmembrane protein 2 [Source:MGI Symbol;Acc:MGI:1345184]	ENSMUST00000057207,ENSMUST00000102801,ENSMUST00000128501,ENSMUST00000146113,ENSMUST00000149787,ENSMUST00000155147,ENSMUST00000157030,ENSMUST00000163524	9.75193	278	11.7014	323	11.4307	281	12.3569	425	7.33602	153	8.10826	235	8.73584	156
ENSMUSG00000028351	Brinp1	6.48602	5.65125	7.59905	-1.56253	-0.643879	0.00123533	0.114459	4	68761514	68954397	-1	protein_coding	bone morphogenic protein/retinoic acid inducible neural specific 1 [Source:MGI Symbol;Acc:MGI:1928478]	ENSMUST00000030036,ENSMUST00000140572,ENSMUST00000156773	8.03306	229	4.49217	124	5.3696	132	4.71016	162	6.90448	144	8.5568	248	7.33586	131
ENSMUSG00000038168	P3h2	65.373	70.7619	58.1878	1.25388	0.326396	0.00127305	0.116851	16	25959288	26105784	-1	protein_coding	prolyl 3-hydroxylase 2 [Source:MGI Symbol;Acc:MGI:2146663]	ENSMUST00000039990,ENSMUST00000159161,ENSMUST00000160067,ENSMUST00000161878	64.2294	1831	68.6505	1895	79.8931	1964	70.2744	2417	63.5788	1326	55.3777	1605	55.607	993
ENSMUSG00000104208	Gm37401	1.25784	0.834957	1.82167	-2.30899	-1.20726	0.00127701	0.116851	9	108337089	108338273	-1	lncRNA	predicted gene, 37401 [Source:MGI Symbol;Acc:MGI:5610629]	ENSMUST00000192053	0.982208	28	0.869453	24	0.732218	18	0.755951	26	1.91791	40	1.58715	46	1.95996	35
ENSMUSG00000031825	Crispld2	12.12	14.2486	9.28191	1.4608	0.546755	0.00130328	0.118518	8	119992438	120052793	1	protein_coding	cysteine-rich secretory protein LCCL domain containing 2 [Source:MGI Symbol;Acc:MGI:1926142]	ENSMUST00000034282,ENSMUST00000108972,ENSMUST00000132583,ENSMUST00000144801,ENSMUST00000151629	15.8907	453	10.4334	288	15.3766	378	15.2935	526	8.67855	181	9.14335	265	10.0238	179
ENSMUSG00000036856	Wnt4	28.9347	31.6261	25.3462	1.31765	0.397966	0.00132018	0.119318	4	137277489	137299726	1	protein_coding	wingless-type MMTV integration site family, member 4 [Source:MGI Symbol;Acc:MGI:98957]	ENSMUST00000045747	27.116	773	34.2347	945	32.5023	799	32.6513	1123	29.6797	619	21.4955	623	24.8635	444
ENSMUSG00000025955	Akr1cl	4.95722	3.85747	6.42356	-1.76952	-0.82336	0.00134145	0.12016	1	65012689	65032759	-1	protein_coding	aldo-keto reductase family 1, member C-like [Source:MGI Symbol;Acc:MGI:1918111]	ENSMUST00000069142,ENSMUST00000159566,ENSMUST00000159896,ENSMUST00000160283,ENSMUST00000161313,ENSMUST00000162800	4.45502	127	3.44158	95	4.5967	113	2.93658	101	6.6168	138	5.48601	159	7.16787	128
ENSMUSG00000040606	Kazn	30.5021	33.5681	26.4143	1.28961	0.366934	0.00134996	0.12016	4	142102390	142239401	-1	protein_coding	kazrin, periplakin interacting protein [Source:MGI Symbol;Acc:MGI:1918779]	ENSMUST00000036476,ENSMUST00000129032,ENSMUST00000135922,ENSMUST00000144611,ENSMUST00000148812,ENSMUST00000155023,ENSMUST00000172864,ENSMUST00000173068,ENSMUST00000174432	32.1673	917	33.9811	938	34.4549	847	33.6689	1158	26.2754	548	25.3599	735	27.6075	493
ENSMUSG00000035165	Kcne3	1.29146	0.80386	1.9416	-2.26851	-1.18174	0.00135397	0.12016	7	100176502	100184869	1	protein_coding	potassium voltage-gated channel, Isk-related subfamily, gene 3 [Source:MGI Symbol;Acc:MGI:1891124]	ENSMUST00000049333,ENSMUST00000170954,ENSMUST00000178946,ENSMUST00000179842,ENSMUST00000207358,ENSMUST00000207995,ENSMUST00000208260,ENSMUST00000208555	0.63142	18	1.01436	28	0.610181	15	0.959477	33	2.1097	44	1.58715	46	2.12796	38
ENSMUSG00000059173	Pde1a	27.4048	24.3583	31.4667	-1.34249	-0.424916	0.00138425	0.122113	2	79834453	80129458	-1	protein_coding	phosphodiesterase 1A, calmodulin-dependent [Source:MGI Symbol;Acc:MGI:1201792]	ENSMUST00000090756,ENSMUST00000102651,ENSMUST00000102652,ENSMUST00000102653,ENSMUST00000102654,ENSMUST00000102655,ENSMUST00000125887,ENSMUST00000134739,ENSMUST00000146076,ENSMUST00000183775	26.9406	768	20.9393	578	21.2343	522	28.3191	974	35.1937	734	26.671	773	32.5354	581
ENSMUSG00000035202	Lars2	381.052	338.85	437.322	-1.34245	-0.42487	0.00140284	0.122651	9	123366927	123462666	1	protein_coding	leucyl-tRNA synthetase, mitochondrial [Source:MGI Symbol;Acc:MGI:2142973]	ENSMUST00000038863,ENSMUST00000213711,ENSMUST00000214074,ENSMUST00000214557,ENSMUST00000215087,ENSMUST00000215464,ENSMUST00000215674,ENSMUST00000216843,ENSMUST00000217116	379.694	10824	284.709	7859	362.651	8915	328.345	11293	440.688	9191	373.67	10830	497.607	8886
ENSMUSG00000021095	Gsc	1.25501	1.69735	0.665215	2.40674	1.26708	0.00140789	0.122651	12	104471209	104473330	-1	protein_coding	goosecoid homeobox [Source:MGI Symbol;Acc:MGI:95841]	ENSMUST00000021513	1.89426	54	0.796998	22	2.23733	55	1.8608	64	0.383582	8	0.828077	24	0.783985	14
ENSMUSG00000070407	Hs3st3b1	7.6267	6.05427	9.72327	-1.60175	-0.679652	0.00142588	0.122651	11	63885792	63922290	-1	protein_coding	heparan sulfate (glucosamine) 3-O-sulfotransferase 3B1 [Source:MGI Symbol;Acc:MGI:1333853]	ENSMUST00000094103	6.06865	173	6.70203	185	5.1662	127	6.28021	216	9.30188	194	11.5241	334	8.34384	149
ENSMUSG00000115289	Gm49164	4.22729	3.04774	5.80002	-1.7442	-0.802564	0.00143408	0.122651	14	73728568	73956061	1	lncRNA	predicted gene, 49164 [Source:MGI Symbol;Acc:MGI:6118590]	ENSMUST00000226696,ENSMUST00000228116,ENSMUST00000228430	2.38536	68	2.46345	68	3.41702	84	3.92513	135	4.79478	100	4.48542	130	8.11985	145
ENSMUSG00000032796	Lama1	17.0554	19.6964	13.5341	1.43258	0.518617	0.00144021	0.122651	17	67697259	67822647	1	protein_coding	laminin, alpha 1 [Source:MGI Symbol;Acc:MGI:99892]	ENSMUST00000035471,ENSMUST00000233224,ENSMUST00000233821	20.8719	595	18.8019	519	17.858	439	21.2539	731	12.0828	252	16.4235	476	12.0958	216
ENSMUSG00000033676	Gabrb3	7.79835	8.97757	6.22605	1.53343	0.616758	0.00144031	0.122651	7	57419692	57828802	1	protein_coding	gamma-aminobutyric acid (GABA) A receptor, subunit beta 3 [Source:MGI Symbol;Acc:MGI:95621]	ENSMUST00000039697,ENSMUST00000085240,ENSMUST00000136033,ENSMUST00000138350,ENSMUST00000156375,ENSMUST00000196198	7.15609	204	9.41907	260	8.66458	213	10.6705	367	6.71269	140	6.14157	178	5.82389	104
ENSMUSG00000115234	Gm49130	4.40802	3.20476	6.01236	-1.75529	-0.811709	0.00146936	0.124406	14	54940355	54942852	1	lncRNA	predicted gene, 49130 [Source:MGI Symbol;Acc:MGI:6118539]	ENSMUST00000227485	2.63092	75	3.22422	89	3.8238	94	3.14011	108	6.18527	129	4.79595	139	7.05587	126
ENSMUSG00000032511	Scn5a	13.243	6.61008	22.087	-2.67062	-1.41717	0.00150957	0.12708	9	119483408	119579016	-1	protein_coding	sodium channel, voltage-gated, type V, alpha [Source:MGI Symbol;Acc:MGI:98251]	ENSMUST00000065196,ENSMUST00000117911,ENSMUST00000120420,ENSMUST00000138934	5.15659	147	10.9768	303	4.84077	119	5.46611	188	9.54161	199	42.8875	1243	13.8317	247
ENSMUSG00000041439	Mfsd6	40.5557	45.0964	34.5014	1.27512	0.350629	0.00155502	0.12944	1	52656286	52727462	-1	protein_coding	major facilitator superfamily domain containing 6 [Source:MGI Symbol;Acc:MGI:1922925]	ENSMUST00000087701,ENSMUST00000147421,ENSMUST00000147758,ENSMUST00000149887,ENSMUST00000156876,ENSMUST00000188126	48.8649	1393	42.4583	1172	45.4788	1118	43.5835	1499	38.2144	797	31.0184	899	34.2714	612
ENSMUSG00000031391	L1cam	23.2883	18.4779	29.7021	-1.55977	-0.64133	0.00155518	0.12944	X	73853778	73896105	-1	protein_coding	L1 cell adhesion molecule [Source:MGI Symbol;Acc:MGI:96721]	ENSMUST00000066576,ENSMUST00000102871,ENSMUST00000114430,ENSMUST00000124560,ENSMUST00000129612,ENSMUST00000130110,ENSMUST00000135104,ENSMUST00000141221,ENSMUST00000144478,ENSMUST00000145805,ENSMUST00000146790,ENSMUST00000148250,ENSMUST00000155246	19.2232	548	16.7007	461	20.5428	505	17.445	600	43.0571	898	21.6335	627	24.4155	436
ENSMUSG00000034687	Fras1	180.126	193.012	162.946	1.23036	0.299079	0.00157142	0.130057	5	96373955	96784728	1	protein_coding	Fraser extracellular matrix complex subunit 1 [Source:MGI Symbol;Acc:MGI:2385368]	ENSMUST00000036019,ENSMUST00000196751,ENSMUST00000197126,ENSMUST00000198016,ENSMUST00000199204,ENSMUST00000199841	169.712	4838	195.228	5389	183.665	4515	223.442	7685	155.159	3236	156.162	4526	177.517	3170
ENSMUSG00000031239	Itm2a	622.245	693.348	527.441	1.29664	0.374777	0.0015967	0.131411	X	107397099	107403376	-1	protein_coding	integral membrane protein 2A [Source:MGI Symbol;Acc:MGI:107706]	ENSMUST00000033591	724.133	20643	678.68	18734	696.298	17117	674.28	23191	539.365	11249	490.808	14225	552.15	9860
ENSMUSG00000063623	C230062I16Rik	20.8724	16.2609	27.021	-1.46908	-0.554913	0.00161366	0.132069	7	29953621	29970352	1	transcribed_unprocessed_pseudogene	RIKEN cDNA C230062I16 gene [Source:MGI Symbol;Acc:MGI:2442417]	ENSMUST00000077142,ENSMUST00000207746,ENSMUST00000208015,ENSMUST00000208342,ENSMUST00000238888,ENSMUST00000239012,ENSMUST00000239047	12.0321	343	18.6208	514	16.8003	413	17.5904	605	30.6866	640	16.6651	483	33.7114	602
ENSMUSG00000029309	Sparcl1	91.0346	100.482	78.438	1.28122	0.357516	0.00163825	0.133341	5	104079111	104113733	-1	protein_coding	SPARC-like 1 [Source:MGI Symbol;Acc:MGI:108110]	ENSMUST00000031249,ENSMUST00000199947	102.886	2933	98.7553	2726	107.595	2645	92.6913	3188	92.5872	1931	65.2801	1892	77.4465	1383
ENSMUSG00000021701	Plk2	166.908	152.749	185.788	-1.22891	-0.297377	0.00168493	0.136387	13	110395046	110400844	1	protein_coding	polo like kinase 2 [Source:MGI Symbol;Acc:MGI:1099790]	ENSMUST00000022212,ENSMUST00000223756,ENSMUST00000224489,ENSMUST00000225156,ENSMUST00000225340	157.609	4493	152.589	4212	148.559	3652	152.237	5236	187.38	3908	191.907	5562	178.077	3180
ENSMUSG00000059588	Calcrl	63.5243	70.4232	54.3257	1.22906	0.29756	0.00171139	0.137772	2	84330626	84425411	-1	protein_coding	calcitonin receptor-like [Source:MGI Symbol;Acc:MGI:1926944]	ENSMUST00000074262,ENSMUST00000099944,ENSMUST00000151295	82.4704	2351	61.876	1708	69.1946	1701	68.1519	2344	45.7422	954	62.2438	1804	54.991	982
ENSMUSG00000018486	Wnt9b	11.6875	13.65	9.07074	1.5019	0.586788	0.00181912	0.145648	11	103727364	103749821	-1	protein_coding	wingless-type MMTV integration site family, member 9B [Source:MGI Symbol;Acc:MGI:1197020]	ENSMUST00000018630	13.4001	382	10.687	295	15.5393	382	14.9737	515	9.68546	202	9.79892	284	7.72785	138
ENSMUSG00000115801		73.6643	66.8184	82.7921	-1.23186	-0.300842	0.00184906	0.147245	14	44544055	44637201	-1	lncRNA	novel transcript	ENSMUST00000226445	64.8959	1850	70.0996	1935	56.8282	1397	75.4498	2595	75.7575	1580	80.6685	2338	91.9503	1642
ENSMUSG00000047986	Palm3	6.89649	8.02897	5.38652	1.54793	0.630336	0.00188443	0.149255	8	84021471	84030295	1	protein_coding	paralemmin 3 [Source:MGI Symbol;Acc:MGI:1921587]	ENSMUST00000055077,ENSMUST00000142367,ENSMUST00000154171	7.12101	203	9.02057	249	8.29847	204	7.67581	264	4.98657	104	6.24508	181	4.92791	88
ENSMUSG00000075591	Gm10874	3.94364	2.90854	5.32377	-1.74198	-0.80073	0.00195981	0.154396	5	138363719	138388287	1	lncRNA	predicted gene 10874 [Source:MGI Symbol;Acc:MGI:3704261]	ENSMUST00000100526	2.56076	73	3.40536	94	2.44073	60	3.22733	111	4.55504	95	4.41641	128	6.99987	125
ENSMUSG00000069919	Hba-a1	809.733	856.141	747.855	1.36367	0.447498	0.00202426	0.158625	11	32283511	32284465	1	protein_coding	hemoglobin alpha, adult chain 1 [Source:MGI Symbol;Acc:MGI:96015]	ENSMUST00000093209,ENSMUST00000142555	516.992	14738	705.597	19477	831.026	20429	1370.95	47152	541.666	11297	477.594	13842	1224.31	21863
ENSMUSG00000021087	Rtn1	21.1988	17.95	25.5304	-1.38403	-0.468877	0.00205539	0.16012	12	72211752	72409054	-1	protein_coding	reticulon 1 [Source:MGI Symbol;Acc:MGI:1933947]	ENSMUST00000021497,ENSMUST00000078505,ENSMUST00000137990,ENSMUST00000144181,ENSMUST00000150156,ENSMUST00000221756	17.2237	491	17.2441	476	18.1427	446	19.1895	660	29.9674	625	19.6323	569	26.9915	482
ENSMUSG00000106666	Gm43587	1.189	1.53043	0.733773	2.27242	1.18423	0.00206509	0.16012	3	112766809	112767012	-1	processed_pseudogene	predicted gene 43587 [Source:MGI Symbol;Acc:MGI:5663724]	ENSMUST00000199590	1.12252	32	1.55777	43	1.66783	41	1.77358	61	0.671269	14	0.690065	20	0.839984	15
ENSMUSG00000003134	Tbc1d8	40.2119	44.3408	34.7067	1.25545	0.328205	0.00209	0.161203	1	39371492	39478755	-1	protein_coding	TBC1 domain family, member 8 [Source:MGI Symbol;Acc:MGI:1927225]	ENSMUST00000054462,ENSMUST00000192099,ENSMUST00000192531,ENSMUST00000193823,ENSMUST00000195854	46.8654	1336	41.9873	1159	44.4619	1093	44.0487	1515	37.3513	779	32.3295	937	34.4394	615
ENSMUSG00000025407	Gli1	6.3694	7.38994	5.00868	1.67152	0.741162	0.00211074	0.161955	10	127329882	127341974	-1	protein_coding	GLI-Kruppel family member GLI1 [Source:MGI Symbol;Acc:MGI:95727]	ENSMUST00000026474,ENSMUST00000218236,ENSMUST00000218451,ENSMUST00000219671,ENSMUST00000219808	5.75294	164	7.24544	200	8.6239	212	7.93749	273	3.3084	69	7.79773	226	3.91993	70
ENSMUSG00000022899	Slc15a2	2.2963	2.90569	1.48378	2.3615	1.23971	0.00215638	0.16392	16	36750177	36784962	-1	protein_coding	solute carrier family 15 (H+/peptide transporter), member 2 [Source:MGI Symbol;Acc:MGI:1890457]	ENSMUST00000023616,ENSMUST00000100308,ENSMUST00000163471,ENSMUST00000163964,ENSMUST00000164579,ENSMUST00000164770,ENSMUST00000165380,ENSMUST00000165531,ENSMUST00000166399,ENSMUST00000167909,ENSMUST00000167941,ENSMUST00000168279,ENSMUST00000169644,ENSMUST00000172382	2.28013	65	1.92004	53	4.92213	121	2.50045	86	0.287687	6	2.03569	59	2.12796	38
ENSMUSG00000049691	Nkx3-2	0.844561	1.17587	0.402817	2.71147	1.43907	0.0021586	0.16392	5	41761483	41764501	-1	protein_coding	NK3 homeobox 2 [Source:MGI Symbol;Acc:MGI:108015]	ENSMUST00000060820	1.43823	41	1.05059	29	1.3424	33	0.872252	30	0.527426	11	0.345032	10	0.335994	6
ENSMUSG00000020758	Itgb4	17.951	20.5803	14.4452	1.42694	0.51293	0.00220245	0.166393	11	115974709	116008412	1	protein_coding	integrin beta 4 [Source:MGI Symbol;Acc:MGI:96613]	ENSMUST00000021107,ENSMUST00000068981,ENSMUST00000106458,ENSMUST00000106460,ENSMUST00000106461,ENSMUST00000127523,ENSMUST00000130286,ENSMUST00000150129,ENSMUST00000151691,ENSMUST00000169928	21.5384	614	19.2366	531	20.9902	516	20.5561	707	18.412	384	13.8358	401	11.0878	198
ENSMUSG00000018893	Mb	24.6146	19.2236	31.8027	-1.47111	-0.556909	0.00224391	0.16866	15	77015487	77050670	-1	protein_coding	myoglobin [Source:MGI Symbol;Acc:MGI:96922]	ENSMUST00000019037,ENSMUST00000166179,ENSMUST00000169226,ENSMUST00000229125,ENSMUST00000229423,ENSMUST00000230031	13.1546	375	23.9824	662	17.7766	437	21.9807	756	29.2482	610	41.5764	1205	24.5835	439
ENSMUSG00000037016	Frem2	111.822	122.7	97.318	1.261	0.334567	0.00226674	0.16888	3	53513938	53657355	-1	protein_coding	Fras1 related extracellular matrix protein 2 [Source:MGI Symbol;Acc:MGI:2444465]	ENSMUST00000091137,ENSMUST00000197519,ENSMUST00000199323,ENSMUST00000199543	122.355	3488	107.414	2965	121.589	2989	139.444	4796	107.643	2245	85.361	2474	98.9501	1767
ENSMUSG00000028360	Slc44a5	9.96446	8.7344	11.6046	-1.52662	-0.610341	0.00226976	0.16888	3	153973436	154271722	1	protein_coding	solute carrier family 44, member 5 [Source:MGI Symbol;Acc:MGI:3035141]	ENSMUST00000089948,ENSMUST00000128362,ENSMUST00000144677,ENSMUST00000239250	12.4881	356	6.84694	189	7.60693	187	7.99564	275	14.72	307	9.45388	274	10.6398	190
ENSMUSG00000027560	Dok5	13.639	15.3833	11.3131	1.40869	0.494352	0.0023138	0.170496	2	170731807	170879769	1	protein_coding	docking protein 5 [Source:MGI Symbol;Acc:MGI:1924079]	ENSMUST00000029075	13.786	393	16.8456	465	16.8003	413	14.1014	485	11.7472	245	10.0404	291	12.1518	217
ENSMUSG00000071497	Nutf2-ps1	19.3222	22.7694	14.726	1.45534	0.541352	0.00231463	0.170496	19	53588168	53589068	-1	protein_coding	nuclear transport factor 2, pseudogene 1 [Source:MGI Symbol;Acc:MGI:108008]	ENSMUST00000095978	25.2217	719	27.7138	765	15.7834	388	22.3587	769	13.3774	279	15.0089	435	15.7917	282
ENSMUSG00000093456	Gm20662	2.85271	3.34216	2.20011	1.78522	0.836102	0.00236414	0.173276	9	107996349	108045270	1	protein_coding	predicted gene 20662 [Source:MGI Symbol;Acc:MGI:5313109]	ENSMUST00000176356,ENSMUST00000176454,ENSMUST00000176459	1.61363	46	3.29667	91	3.86448	95	4.59386	158	1.67817	35	2.34622	68	2.57595	46
ENSMUSG00000034981	Parm1	149.235	164.095	129.422	1.23031	0.29902	0.00239419	0.17461	5	91517615	91626894	1	protein_coding	prostate androgen-regulated mucin-like protein 1 [Source:MGI Symbol;Acc:MGI:2443349]	ENSMUST00000040576	177.464	5059	142.916	3945	174.024	4278	161.977	5571	130.706	2726	133.804	3878	123.758	2210
ENSMUSG00000073557	Ppp1r12b	134.558	142.456	124.026	1.2138	0.279531	0.00241542	0.174891	1	134754658	134955942	-1	protein_coding	protein phosphatase 1, regulatory subunit 12B [Source:MGI Symbol;Acc:MGI:1916417]	ENSMUST00000045665,ENSMUST00000086444,ENSMUST00000112163,ENSMUST00000132025,ENSMUST00000137022,ENSMUST00000141419,ENSMUST00000146639,ENSMUST00000156348,ENSMUST00000168381,ENSMUST00000191540,ENSMUST00000238280	117.97	3363	149.22	4119	145.833	3585	156.802	5393	125.431	2616	124.626	3612	122.022	2179
ENSMUSG00000025795	Rassf3	78.1018	83.3489	71.1057	1.20521	0.269289	0.00242178	0.174891	10	121410350	121476347	-1	protein_coding	Ras association (RalGDS/AF-6) domain family member 3 [Source:MGI Symbol;Acc:MGI:2179722]	ENSMUST00000026902,ENSMUST00000219500	76.0159	2167	81.5836	2252	95.229	2341	80.567	2771	73.5519	1534	74.0784	2147	65.6868	1173
ENSMUSG00000062480	Acat3	2.94689	2.10014	4.07589	-1.89528	-0.922414	0.00244366	0.175047	17	12923813	12940600	-1	protein_coding	acetyl-Coenzyme A acetyltransferase 3 [Source:MGI Symbol;Acc:MGI:109182]	ENSMUST00000043923,ENSMUST00000160378,ENSMUST00000160921	1.9995	57	1.26795	35	2.40005	59	2.73305	94	3.2125	67	2.96728	86	6.04789	108
ENSMUSG00000022742	Cpox	59.0257	62.3959	54.532	1.22719	0.295357	0.00244772	0.175047	16	58670292	58717636	1	protein_coding	coproporphyrinogen oxidase [Source:MGI Symbol;Acc:MGI:104841]	ENSMUST00000060077,ENSMUST00000231276,ENSMUST00000231342,ENSMUST00000231492,ENSMUST00000232176,ENSMUST00000232532	49.812	1420	62.9991	1739	66.2657	1629	70.507	2425	55.2838	1153	46.9934	1362	61.3188	1095
ENSMUSG00000027840	Wnt2b	9.27332	10.4881	7.65358	1.44629	0.532361	0.00247316	0.175816	3	104945272	104961921	-1	protein_coding	wingless-type MMTV integration site family, member 2B [Source:MGI Symbol;Acc:MGI:1261834]	ENSMUST00000029429,ENSMUST00000198108	8.59432	245	10.9768	303	9.9663	245	12.415	427	8.10318	169	7.5217	218	7.33586	131
ENSMUSG00000061397	Krt79	11.5256	13.3171	9.13703	1.49607	0.581181	0.00248233	0.175816	15	101929332	101940324	-1	protein_coding	keratin 79 [Source:MGI Symbol;Acc:MGI:2385030]	ENSMUST00000023799,ENSMUST00000229195,ENSMUST00000230273,ENSMUST00000230441	12.3478	352	12.4259	343	16.3122	401	12.1824	419	11.028	230	8.03925	233	8.34384	149
ENSMUSG00000015968	Cacna1d	38.8889	42.3486	34.2759	1.25049	0.322499	0.00251283	0.177124	14	30039939	30491455	-1	protein_coding	calcium channel, voltage-dependent, L type, alpha 1D subunit [Source:MGI Symbol;Acc:MGI:88293]	ENSMUST00000112249,ENSMUST00000112250,ENSMUST00000223573,ENSMUST00000223803,ENSMUST00000223985,ENSMUST00000224073,ENSMUST00000224198,ENSMUST00000224395,ENSMUST00000224785,ENSMUST00000224912,ENSMUST00000225353,ENSMUST00000225717,ENSMUST00000238336,ENSMUST00000238504,ENSMUST00000238524,ENSMUST00000238568,ENSMUST00000238571,ENSMUST00000238675,ENSMUST00000238690,ENSMUST00000238735	40.8669	1165	44.9942	1242	43.5263	1070	40.0073	1376	35.5293	741	32.019	928	35.2793	630
ENSMUSG00000067780	Pi15	3.61546	4.70552	2.16204	1.75026	0.807566	0.0025389	0.17811	1	17601901	17630939	1	protein_coding	peptidase inhibitor 15 [Source:MGI Symbol;Acc:MGI:1934659]	ENSMUST00000088476	7.4718	213	3.36913	93	4.43398	109	3.54716	122	1.86996	39	2.20821	64	2.40795	43
ENSMUSG00000023984	Gm20517	2.18106	2.94749	1.15914	2.04146	1.0296	0.00257747	0.179774	17	47611589	47683861	1	protein_coding	predicted gene 20517 [Source:MGI Symbol;Acc:MGI:5141982]	ENSMUST00000130830,ENSMUST00000132397,ENSMUST00000146105	4.24454	121	3.26045	90	1.05765	26	3.22733	111	1.48638	31	0.759071	22	1.23198	22
ENSMUSG00000041731	Pgm5	76.8402	81.0751	71.1938	1.2012	0.264475	0.00258703	0.179774	19	24683016	24861855	-1	protein_coding	phosphoglucomutase 5 [Source:MGI Symbol;Acc:MGI:1925668]	ENSMUST00000047666,ENSMUST00000129127,ENSMUST00000133692,ENSMUST00000150339	68.1583	1943	84.9528	2345	88.1509	2167	83.0383	2856	74.7506	1559	74.3199	2154	64.5108	1152
ENSMUSG00000022306	Zfpm2	24.8161	21.9356	28.6567	-1.34033	-0.422591	0.0026334	0.182137	15	40655035	41104592	1	protein_coding	zinc finger protein, multitype 2 [Source:MGI Symbol;Acc:MGI:1334444]	ENSMUST00000053467,ENSMUST00000229777,ENSMUST00000230319,ENSMUST00000230723	23.7484	677	22.5333	622	18.7529	461	22.7076	781	24.0698	502	31.605	916	30.2954	541
ENSMUSG00000019880	Rspo3	97.327	107.211	84.148	1.30964	0.389173	0.00280901	0.193052	10	29452416	29535867	-1	protein_coding	R-spondin 3 [Source:MGI Symbol;Acc:MGI:1920030]	ENSMUST00000092623,ENSMUST00000215256	102.781	2930	112.449	3104	116.504	2864	97.1107	3340	98.9163	2063	63.3134	1835	90.2143	1611
ENSMUSG00000111521	Gm48529	18.8986	15.0192	24.0711	-1.44058	-0.526654	0.00281742	0.193052	9	45930112	45933738	1	lncRNA	predicted gene, 48529 [Source:MGI Symbol;Acc:MGI:6098068]	ENSMUST00000213634,ENSMUST00000213884	10.2781	293	14.1648	391	18.9156	465	16.7182	575	25.1726	525	18.8733	547	28.1675	503
ENSMUSG00000060890	Arr3	0.83225	1.06842	0.517353	2.4789	1.3097	0.00285229	0.194362	X	100605497	100618493	1	protein_coding	arrestin 3, retinal [Source:MGI Symbol;Acc:MGI:2159617]	ENSMUST00000113769,ENSMUST00000131906,ENSMUST00000135237,ENSMUST00000141676,ENSMUST00000154771,ENSMUST00000164940,ENSMUST00000166688	0.456025	13	1.05059	29	1.3424	33	1.42468	49	0.43153	9	0.448542	13	0.671987	12
ENSMUSG00000099032	Tcf24	15.2898	14.1069	16.8669	-1.37812	-0.462704	0.00286292	0.194362	1	9960163	9967932	-1	protein_coding	transcription factor 24 [Source:MGI Symbol;Acc:MGI:3780500]	ENSMUST00000097824,ENSMUST00000185184	19.4337	554	10.1074	279	12.2036	300	14.6829	505	16.9735	354	15.5955	452	18.0317	322
ENSMUSG00000115232	Gm49378	5.47164	7.3909	2.91263	5.60784	2.48744	0.00290586	0.196372	14	55629076	55637895	-1	protein_coding	predicted gene, 49378 [Source:MGI Symbol;Acc:MGI:6121598]	ENSMUST00000156420	8.41893	240	8.33225	230	5.97978	147	6.83264	235	1.63023	34	7.10766	206	0	0
ENSMUSG00000027737	Slc7a11	3.26344	2.52129	4.25296	-1.80296	-0.850368	0.00294347	0.198005	3	49892526	50443614	-1	protein_coding	solute carrier family 7 (cationic amino acid transporter, y+ system), member 11 [Source:MGI Symbol;Acc:MGI:1347355]	ENSMUST00000029297,ENSMUST00000142932,ENSMUST00000192564,ENSMUST00000193838,ENSMUST00000194462	3.01678	86	1.70268	47	2.40005	59	2.96566	102	4.4112	92	3.13979	91	5.2079	93
ENSMUSG00000108934	Gm44732	20.3733	16.9933	24.88	-1.39012	-0.475207	0.00298952	0.198494	7	143459749	143460640	1	lncRNA	predicted gene 44732 [Source:MGI Symbol;Acc:MGI:5753308]	ENSMUST00000208055	13.786	393	18.7295	517	21.153	520	14.3049	492	23.2547	485	24.3938	707	26.9915	482
ENSMUSG00000046714	Foxc2	53.788	49.0055	60.1647	-1.31022	-0.389814	0.00299575	0.198494	8	121116171	121118895	1	protein_coding	forkhead box C2 [Source:MGI Symbol;Acc:MGI:1347481]	ENSMUST00000054691	57.354	1635	38.5457	1064	54.9977	1352	45.1245	1552	66.12	1379	54.7911	1588	59.5829	1064
ENSMUSG00000070343	Gm10288	62.2878	71.9983	49.3405	1.41024	0.495942	0.00300048	0.198494	3	146838811	146839347	-1	processed_pseudogene	predicted gene 10288 [Source:MGI Symbol;Acc:MGI:3704227]	ENSMUST00000084614	79.4186	2264	66.2595	1829	56.3401	1385	85.9749	2957	43.201	901	62.4853	1811	42.3352	756
ENSMUSG00000078870	Gm14410	3.77791	4.82563	2.38095	2.02165	1.01553	0.00300463	0.198494	2	177183453	177206421	-1	protein_coding	predicted gene 14410 [Source:MGI Symbol;Acc:MGI:3709158]	ENSMUST00000108964,ENSMUST00000133301,ENSMUST00000156269	5.40215	154	4.89067	135	5.49163	135	3.51808	121	2.49329	52	1.34563	39	3.30394	59
ENSMUSG00000069045	Ddx3y	37.5084	48.6421	22.6635	2.11253	1.07898	0.00303533	0.199627	Y	1260771	1286629	-1	protein_coding	DEAD (Asp-Glu-Ala-Asp) box polypeptide 3, Y-linked [Source:MGI Symbol;Acc:MGI:1349406]	ENSMUST00000091190,ENSMUST00000187596,ENSMUST00000188182,ENSMUST00000188484	52.8288	1506	24.0549	664	61.8317	1520	55.8532	1921	33.4196	697	12.2831	356	22.2876	398
ENSMUSG00000057522	Spop	84.0898	89.5031	76.872	1.20074	0.263919	0.00307528	0.201356	11	95414080	95493406	1	protein_coding	speckle-type BTB/POZ protein [Source:MGI Symbol;Acc:MGI:1343085]	ENSMUST00000107722,ENSMUST00000107724,ENSMUST00000127713,ENSMUST00000150884,ENSMUST00000150922	81.7689	2331	93.6835	2586	93.1544	2290	89.4058	3075	83.7648	1747	70.5246	2044	76.3266	1363
ENSMUSG00000032577	Mapkapk3	15.4011	17.0802	13.1623	1.36799	0.452053	0.00309435	0.201708	9	107254927	107289877	-1	protein_coding	mitogen-activated protein kinase-activated protein kinase 3 [Source:MGI Symbol;Acc:MGI:2143163]	ENSMUST00000035194,ENSMUST00000128175,ENSMUST00000134682,ENSMUST00000141596,ENSMUST00000141674,ENSMUST00000143487,ENSMUST00000155860,ENSMUST00000192054	14.2771	407	17.0268	470	20.0953	494	16.9217	582	13.2815	277	12.3177	357	13.8877	248
ENSMUSG00000079654	Prrt4	15.0639	16.7216	12.8538	1.41892	0.504791	0.00311171	0.201946	6	29169232	29179584	-1	protein_coding	proline-rich transmembrane protein 4 [Source:MGI Symbol;Acc:MGI:2141677]	ENSMUST00000159200	12.8389	366	17.7513	490	19.8106	487	16.4856	567	16.0625	335	10.627	308	11.8718	212
ENSMUSG00000049939	Lrrc4	7.06207	8.13809	5.62737	1.48422	0.569703	0.00314129	0.202971	6	28661831	28831747	-1	protein_coding	leucine rich repeat containing 4 [Source:MGI Symbol;Acc:MGI:2182081]	ENSMUST00000062304,ENSMUST00000171353	7.50688	214	8.18734	226	8.33915	205	8.51899	293	5.32221	111	5.62403	163	5.93589	106
ENSMUSG00000023945	Slc5a7	1.56293	1.29345	1.92224	-2.12169	-1.08521	0.0031605	0.203321	17	54273590	54299034	-1	protein_coding	solute carrier family 5 (choline transporter), member 7 [Source:MGI Symbol;Acc:MGI:1927126]	ENSMUST00000095712,ENSMUST00000233507,ENSMUST00000233758	2.4906	71	0.869453	24	0.854254	21	0.959477	33	2.25355	47	2.00119	58	1.51197	27
ENSMUSG00000090053	Pakap	20.4366	22.1135	18.2009	1.30646	0.385666	0.00321881	0.206172	4	57434247	57712016	1	protein_coding	paralemmin A kinase anchor protein [Source:MGI Symbol;Acc:MGI:5141924]	ENSMUST00000102904,ENSMUST00000102905,ENSMUST00000131201,ENSMUST00000142556	17.0483	486	22.0986	610	24.6513	606	24.6556	848	17.7407	370	18.9423	549	17.9197	320
ENSMUSG00000001588	Acap1	4.74902	3.44698	6.48509	-1.68802	-0.755329	0.00346304	0.220855	11	69881567	69895539	-1	protein_coding	ArfGAP with coiled-coil, ankyrin repeat and PH domains 1 [Source:MGI Symbol;Acc:MGI:2388270]	ENSMUST00000001631,ENSMUST00000108622,ENSMUST00000127238,ENSMUST00000148037	2.80631	80	3.29667	91	3.90516	96	3.77976	130	4.65094	97	9.76441	283	5.03991	90
ENSMUSG00000039431	Mtmr7	7.51308	8.64139	6.00867	1.48137	0.566936	0.00351874	0.222678	8	40551095	40634797	-1	protein_coding	myotubularin related protein 7 [Source:MGI Symbol;Acc:MGI:1891693]	ENSMUST00000048890,ENSMUST00000048898,ENSMUST00000173487,ENSMUST00000173957,ENSMUST00000174205,ENSMUST00000174537	7.85767	224	10.8319	299	7.44421	183	8.43176	290	6.71269	140	4.76145	138	6.55188	117
ENSMUSG00000032554	Trf	38.3153	35.0509	42.6678	-1.23112	-0.299976	0.00352186	0.222678	9	103204001	103230444	-1	protein_coding	transferrin [Source:MGI Symbol;Acc:MGI:98821]	ENSMUST00000035158,ENSMUST00000112503,ENSMUST00000112645,ENSMUST00000126359,ENSMUST00000164377,ENSMUST00000165296,ENSMUST00000168142,ENSMUST00000170904,ENSMUST00000190051	36.3417	1036	34.3071	947	33.56	825	35.9949	1238	42.1941	880	40.0582	1161	45.7511	817
ENSMUSG00000032596	Uba7	40.0488	36.135	45.2671	-1.25584	-0.328649	0.00353955	0.22284	9	107975505	107984060	1	protein_coding	ubiquitin-like modifier activating enzyme 7 [Source:MGI Symbol;Acc:MGI:1349462]	ENSMUST00000035216,ENSMUST00000075082,ENSMUST00000175933,ENSMUST00000176037,ENSMUST00000176340,ENSMUST00000176478,ENSMUST00000176673,ENSMUST00000176743,ENSMUST00000176842,ENSMUST00000176858,ENSMUST00000177039,ENSMUST00000177071,ENSMUST00000177096,ENSMUST00000177392,ENSMUST00000177494	37.2888	1063	35.394	977	34.2922	843	37.565	1292	51.7357	1079	37.1945	1078	46.8711	837
ENSMUSG00000048482	Bdnf	6.10418	5.47835	6.93862	-1.56015	-0.641685	0.00357206	0.22393	2	109674700	109727007	1	protein_coding	brain derived neurotrophic factor [Source:MGI Symbol;Acc:MGI:88145]	ENSMUST00000053317,ENSMUST00000111042,ENSMUST00000111043,ENSMUST00000111044,ENSMUST00000111045,ENSMUST00000111046,ENSMUST00000111047,ENSMUST00000111049,ENSMUST00000111050,ENSMUST00000111051,ENSMUST00000176893	8.48909	242	3.47781	96	4.5967	113	5.34981	184	6.23322	130	8.14276	236	6.43988	115
ENSMUSG00000056258	Kcnq3	10.4145	11.8708	8.47266	1.41253	0.498278	0.00362529	0.225819	15	65986387	66286642	-1	protein_coding	potassium voltage-gated channel, subfamily Q, member 3 [Source:MGI Symbol;Acc:MGI:1336181]	ENSMUST00000070256,ENSMUST00000183354,ENSMUST00000183633	11.5059	328	12.7882	353	10.6578	262	12.5313	431	9.30188	194	8.10826	235	8.00785	143
ENSMUSG00000029287	Tgfbr3	21.6874	14.8981	30.7399	-1.78039	-0.832195	0.00364811	0.225819	5	107106570	107289629	-1	protein_coding	transforming growth factor, beta receptor III [Source:MGI Symbol;Acc:MGI:104637]	ENSMUST00000031224,ENSMUST00000136882,ENSMUST00000138469,ENSMUST00000146591	13.4001	382	14.346	396	12.9765	319	18.8697	649	19.5627	408	53.1695	1541	19.4876	348
ENSMUSG00000041559	Fmod	38.0436	42.8571	31.6256	1.28086	0.357113	0.00364817	0.225819	1	134037254	134048277	1	protein_coding	fibromodulin [Source:MGI Symbol;Acc:MGI:1328364]	ENSMUST00000048183,ENSMUST00000162779	49.6366	1415	42.893	1184	35.0244	861	43.8743	1509	27.7618	579	33.5716	973	33.5434	599
ENSMUSG00000097652	Mhrt	43.5657	36.7089	52.708	-1.30265	-0.381455	0.00373074	0.228993	14	54968678	54974349	1	lncRNA	myosin heavy chain associated RNA transcript [Source:MGI Symbol;Acc:MGI:3642848]	ENSMUST00000181782,ENSMUST00000185798	26.239	748	45.7187	1262	38.9702	958	35.9077	1235	52.2631	1090	43.198	1252	62.6628	1119
ENSMUSG00000022371	Col14a1	28.5666	26.4261	31.4207	-1.30316	-0.382017	0.00373395	0.228993	15	55307750	55520803	1	protein_coding	collagen, type XIV, alpha 1 [Source:MGI Symbol;Acc:MGI:1341272]	ENSMUST00000023053,ENSMUST00000110217,ENSMUST00000110221,ENSMUST00000125416	33.36	951	21.9899	607	23.6344	581	26.72	919	34.7622	725	30.6044	887	28.8955	516
ENSMUSG00000021765	Fst	5.52029	6.37681	4.37827	1.54276	0.625513	0.00374608	0.228993	13	114452290	114458951	-1	protein_coding	follistatin [Source:MGI Symbol;Acc:MGI:95586]	ENSMUST00000022287,ENSMUST00000223640,ENSMUST00000223865,ENSMUST00000225068,ENSMUST00000231252,ENSMUST00000231498	5.33199	152	5.8688	162	6.63064	163	7.67581	264	4.07556	85	3.79535	110	5.2639	94
ENSMUSG00000031075	Ano1	50.034	55.4086	42.8679	1.27995	0.356087	0.00382706	0.232976	7	144588549	144751974	-1	protein_coding	anoctamin 1, calcium activated chloride channel [Source:MGI Symbol;Acc:MGI:2142149]	ENSMUST00000033393,ENSMUST00000118556,ENSMUST00000121758,ENSMUST00000131571,ENSMUST00000131731,ENSMUST00000141632,ENSMUST00000152531,ENSMUST00000155175,ENSMUST00000208094,ENSMUST00000208985,ENSMUST00000238848	56.0911	1599	46.0448	1271	63.0928	1551	56.4056	1940	46.2696	965	40.7828	1182	41.5512	742
ENSMUSG00000062991	Nrg1	21.2398	19.437	23.6434	-1.31822	-0.398596	0.00384295	0.232981	8	31814551	32884797	-1	protein_coding	neuregulin 1 [Source:MGI Symbol;Acc:MGI:96083]	ENSMUST00000073884,ENSMUST00000207417,ENSMUST00000207470,ENSMUST00000207584,ENSMUST00000207678,ENSMUST00000208205,ENSMUST00000208206,ENSMUST00000208335,ENSMUST00000208355,ENSMUST00000208488,ENSMUST00000208497,ENSMUST00000208598,ENSMUST00000208617,ENSMUST00000208819,ENSMUST00000208820,ENSMUST00000208931,ENSMUST00000209022,ENSMUST00000209107,ENSMUST00000238791,ENSMUST00000238812,ENSMUST00000238816,…	23.7133	676	15.3603	424	19.6885	484	18.986	653	24.0219	501	23.2207	673	23.6876	423
ENSMUSG00000027546	Atp9a	52.796	48.1936	58.9325	-1.26899	-0.343677	0.00390329	0.235669	2	168634438	168742409	-1	protein_coding	ATPase, class II, type 9A [Source:MGI Symbol;Acc:MGI:1330826]	ENSMUST00000029060,ENSMUST00000109175,ENSMUST00000109176,ENSMUST00000109177,ENSMUST00000123156,ENSMUST00000140188,ENSMUST00000147757,ENSMUST00000151610,ENSMUST00000156397,ENSMUST00000156555,ENSMUST00000178504	52.9691	1510	39.4876	1090	49.4654	1216	50.8523	1749	63.8665	1332	58.2759	1689	54.655	976
ENSMUSG00000028919	Arhgef19	9.09549	7.9995	10.5568	-1.41137	-0.497098	0.00392351	0.235923	4	141239499	141257564	1	protein_coding	Rho guanine nucleotide exchange factor (GEF) 19 [Source:MGI Symbol;Acc:MGI:1925912]	ENSMUST00000006618,ENSMUST00000125392,ENSMUST00000135623,ENSMUST00000138096,ENSMUST00000140536,ENSMUST00000141834,ENSMUST00000147903,ENSMUST00000184162	9.57653	273	8.11489	224	6.42724	158	7.87934	271	11.2198	234	8.97084	260	11.4798	205
ENSMUSG00000020357	Flt4	22.9824	20.348	26.4949	-1.29635	-0.374454	0.00397844	0.238254	11	49609263	49652739	1	protein_coding	FMS-like tyrosine kinase 4 [Source:MGI Symbol;Acc:MGI:95561]	ENSMUST00000020617,ENSMUST00000152253	20.1002	573	18.3672	507	20.8275	512	22.097	760	24.789	517	29.7763	863	24.9195	445
ENSMUSG00000020241	Col6a2	77.0702	71.3297	84.7242	-1.20853	-0.273259	0.00402329	0.239964	10	76595762	76623630	-1	protein_coding	collagen, type VI, alpha 2 [Source:MGI Symbol;Acc:MGI:88460]	ENSMUST00000001181,ENSMUST00000105413,ENSMUST00000137365	74.5777	2126	67.455	1862	65.6555	1614	77.6304	2670	89.2309	1861	83.4633	2419	81.4785	1455
ENSMUSG00000017724	Etv4	18.9002	16.6128	21.9501	-1.32639	-0.407509	0.00405714	0.240962	11	101769742	101785371	-1	protein_coding	ets variant 4 [Source:MGI Symbol;Acc:MGI:99423]	ENSMUST00000017868,ENSMUST00000107176,ENSMUST00000129160,ENSMUST00000129995,ENSMUST00000131117,ENSMUST00000131862,ENSMUST00000132040,ENSMUST00000137179,ENSMUST00000140970,ENSMUST00000149099,ENSMUST00000154512,ENSMUST00000164750	16.6625	475	15.469	427	18.997	467	15.3226	527	22.9191	478	22.3236	647	20.6076	368
ENSMUSG00000064179	Tnnt1	83.8273	89.3921	76.4075	1.2671	0.341531	0.00407274	0.240962	7	4504570	4516382	-1	protein_coding	troponin T1, skeletal, slow [Source:MGI Symbol;Acc:MGI:1333868]	ENSMUST00000071798,ENSMUST00000086502,ENSMUST00000108587,ENSMUST00000163538,ENSMUST00000163560,ENSMUST00000163710,ENSMUST00000163722,ENSMUST00000166161,ENSMUST00000166268,ENSMUST00000166959,ENSMUST00000168111,ENSMUST00000169571,ENSMUST00000178163	69.9473	1994	105.131	2902	102.999	2532	79.4912	2734	96.2792	2008	61.2087	1774	71.7347	1281
ENSMUSG00000021900	Btd	33.7684	31.0974	37.3297	-1.25004	-0.32198	0.00412129	0.24286	14	31641028	31668579	1	protein_coding	biotinidase [Source:MGI Symbol;Acc:MGI:1347001]	ENSMUST00000090147,ENSMUST00000128014	34.7982	992	28.4021	784	30.4277	748	30.7614	1058	38.3103	799	36.1594	1048	37.5193	670
ENSMUSG00000110710	C78859	1.14183	1.43845	0.746331	2.19924	1.13701	0.00417508	0.245049	8	94322158	94328100	1	lncRNA	expressed sequence C78859 [Source:MGI Symbol;Acc:MGI:2142856]	ENSMUST00000212800	0.912051	26	1.70268	47	1.62715	40	1.5119	52	0.958956	20	0.552052	16	0.727986	13
ENSMUSG00000053399	Adamts18	8.49882	10.2042	6.22498	1.45744	0.543439	0.00425475	0.24856	8	113697126	113848738	-1	protein_coding	a disintegrin-like and metallopeptidase (reprolysin type) with thrombospondin type 1 motif, 18 [Source:MGI Symbol;Acc:MGI:2442600]	ENSMUST00000093113,ENSMUST00000212437,ENSMUST00000212527,ENSMUST00000212665,ENSMUST00000213061,ENSMUST00000213076,ENSMUST00000213078	13.0143	371	5.10803	141	11.268	277	11.4265	393	4.17146	87	6.83164	198	7.67186	137
ENSMUSG00000062456	Rpl9-ps6	12.2659	14.2644	9.60128	1.4276	0.513589	0.00426864	0.24856	19	32465865	32466578	-1	protein_coding	ribosomal protein L9, pseudogene 6 [Source:MGI Symbol;Acc:MGI:3642682]	ENSMUST00000078034	15.3996	439	17.2079	475	12.1223	298	12.3278	424	9.11008	190	10.0059	290	9.68782	173
ENSMUSG00000032034	Kcnj5	66.795	69.8161	62.7667	1.20364	0.2674	0.00432171	0.250659	9	32314707	32344350	-1	protein_coding	potassium inwardly-rectifying channel, subfamily J, member 5 [Source:MGI Symbol;Acc:MGI:104755]	ENSMUST00000034533,ENSMUST00000214223,ENSMUST00000216033	53.6356	1529	78.9753	2180	73.3845	1804	73.2691	2520	68.0859	1420	54.1356	1569	66.0788	1180
ENSMUSG00000037379	Spon2	46.8847	43.5343	51.3519	-1.24749	-0.319032	0.00440767	0.252643	5	33198184	33218455	-1	protein_coding	spondin 2, extracellular matrix protein [Source:MGI Symbol;Acc:MGI:1923724]	ENSMUST00000046186,ENSMUST00000200884,ENSMUST00000201175,ENSMUST00000201199,ENSMUST00000201475	49.8471	1421	38.1472	1053	37.1804	914	48.9624	1684	54.4687	1136	48.6841	1411	50.903	909
ENSMUSG00000028212	Ccne2	42.3073	46.0334	37.3392	1.228	0.296312	0.00442303	0.252643	4	11191351	11204779	1	protein_coding	cyclin E2 [Source:MGI Symbol;Acc:MGI:1329034]	ENSMUST00000029866,ENSMUST00000108324,ENSMUST00000144438,ENSMUST00000145430,ENSMUST00000147725,ENSMUST00000149075,ENSMUST00000170901	46.7952	1334	42.2409	1166	46.8619	1152	48.2355	1659	33.5635	700	41.8869	1214	36.5673	653
ENSMUSG00000021182	Ccdc88c	18.983	21.3836	15.7821	1.33157	0.413129	0.00442669	0.252643	12	100911523	101029056	-1	protein_coding	coiled-coil domain containing 88C [Source:MGI Symbol;Acc:MGI:1915589]	ENSMUST00000068411,ENSMUST00000085096,ENSMUST00000222204,ENSMUST00000223097,ENSMUST00000223235,ENSMUST00000223416,ENSMUST00000223509,ENSMUST00000233416	22.6259	645	20.7582	573	22.292	548	19.8583	683	16.2064	338	14.2843	414	16.8557	301
ENSMUSG00000032033	Barx2	0.88201	1.17791	0.487477	2.66377	1.41347	0.00443282	0.252643	9	31846044	31913462	-1	protein_coding	BarH-like homeobox 2 [Source:MGI Symbol;Acc:MGI:109617]	ENSMUST00000116615	1.05237	30	1.01436	28	1.42376	35	1.22115	42	0.527426	11	0.207019	6	0.727986	13
ENSMUSG00000050010	Shisa3	7.42862	6.23697	9.01748	-1.50924	-0.593823	0.00444166	0.252643	5	67607882	67623552	1	protein_coding	shisa family member 3 [Source:MGI Symbol;Acc:MGI:3041225]	ENSMUST00000087241,ENSMUST00000142843	6.73514	192	4.38349	121	7.20014	177	6.62911	228	8.96624	187	9.35037	271	8.73584	156
ENSMUSG00000040936	Ulk4	6.5454	5.36814	8.11509	-1.49148	-0.576746	0.00446649	0.253078	9	120955351	121277197	-1	protein_coding	unc-51-like kinase 4 [Source:MGI Symbol;Acc:MGI:1921622]	ENSMUST00000051479,ENSMUST00000051565,ENSMUST00000164336,ENSMUST00000164969,ENSMUST00000169176,ENSMUST00000170237,ENSMUST00000170406,ENSMUST00000171061,ENSMUST00000171923,ENSMUST00000213408	5.26183	150	4.9269	136	4.80009	118	6.48374	223	8.39087	175	6.21058	180	9.74382	174
ENSMUSG00000020155	Kcnmb1	20.0529	21.8878	17.6065	1.31675	0.396983	0.00455769	0.255704	11	33963013	33973641	1	protein_coding	potassium large conductance calcium-activated channel, subfamily M, beta member 1 [Source:MGI Symbol;Acc:MGI:1334203]	ENSMUST00000020362	17.5394	500	26.6994	737	23.7157	583	19.5966	674	17.8845	373	17.6311	511	17.3037	309
ENSMUSG00000029093	Sorcs2	43.7063	39.8752	48.8144	-1.2222	-0.289475	0.00458715	0.255704	5	36017180	36398139	-1	protein_coding	sortilin-related VPS10 domain containing receptor 2 [Source:MGI Symbol;Acc:MGI:1932289]	ENSMUST00000037370,ENSMUST00000070720,ENSMUST00000135324,ENSMUST00000137040,ENSMUST00000141508	39.7444	1133	38.2559	1056	40.0686	985	41.4319	1425	47.0368	981	52.4794	1521	46.9271	838
ENSMUSG00000107877	Gm43951	6.95218	8.8368	4.43936	2.87656	1.52434	0.00459397	0.255704	11	72154097	72207026	-1	protein_coding	predicted gene, 43951 [Source:MGI Symbol;Acc:MGI:5690343]	ENSMUST00000108506,ENSMUST00000204457	10.4886	299	9.67266	267	13.3833	329	1.80265	62	11.5075	240	1.13861	33	0.671987	12
ENSMUSG00000038145	Snrk	53.2748	49.2912	58.5863	-1.2181	-0.284628	0.00460196	0.255704	9	122117266	122169702	1	protein_coding	SNF related kinase [Source:MGI Symbol;Acc:MGI:108104]	ENSMUST00000118886,ENSMUST00000119215,ENSMUST00000120173,ENSMUST00000131169,ENSMUST00000134949,ENSMUST00000139181,ENSMUST00000142784,ENSMUST00000145384,ENSMUST00000146832,ENSMUST00000151872,ENSMUST00000215432,ENSMUST00000217631	52.8639	1507	43.2915	1195	49.9535	1228	51.0558	1756	56.1948	1172	64.7971	1878	54.767	978
ENSMUSG00000081800	Gm14200	3.36782	2.55113	4.45673	-1.79849	-0.846789	0.00460886	0.255704	2	158468169	158468360	-1	processed_pseudogene	predicted gene 14200 [Source:MGI Symbol;Acc:MGI:3651374]	ENSMUST00000122256	2.77123	79	2.46345	68	3.05091	75	1.91895	66	5.08247	106	3.41582	99	4.87191	87
ENSMUSG00000109953	5430430B14Rik	1.42087	1.75996	0.968739	2.068	1.04824	0.00461697	0.255704	8	27279441	27281070	1	TEC	RIKEN cDNA 5430430B14 gene [Source:MGI Symbol;Acc:MGI:1918674]	ENSMUST00000209427	1.08745	31	2.02872	56	2.23733	55	1.68635	58	1.24664	26	0.931587	27	0.727986	13
ENSMUSG00000059974	Ntm	73.3764	78.4643	66.5925	1.23017	0.298863	0.00467993	0.25822	9	28994750	29963141	-1	protein_coding	neurotrimin [Source:MGI Symbol;Acc:MGI:2446259]	ENSMUST00000075069,ENSMUST00000115236,ENSMUST00000115237,ENSMUST00000124119,ENSMUST00000126044,ENSMUST00000140118,ENSMUST00000146651,ENSMUST00000148606,ENSMUST00000151977,ENSMUST00000152513,ENSMUST00000155308	69.386	1978	87.5249	2416	82.2524	2022	74.6938	2569	71.0107	1481	55.6882	1614	73.0786	1305
ENSMUSG00000057751	Megf6	43.9178	40.1911	48.8868	-1.32231	-0.403056	0.00470169	0.258453	4	154170730	154275713	1	protein_coding	multiple EGF-like-domains 6 [Source:MGI Symbol;Acc:MGI:1919351]	ENSMUST00000030897,ENSMUST00000127088,ENSMUST00000128700,ENSMUST00000138945,ENSMUST00000142110,ENSMUST00000152159,ENSMUST00000183595	48.4088	1380	27.6051	762	41.1669	1012	43.5835	1499	49.0986	1024	55.1707	1599	42.3912	757
ENSMUSG00000024558	Mapk4	3.23864	3.90821	2.34588	1.79484	0.843855	0.00475549	0.260438	18	73928486	74065359	-1	protein_coding	mitogen-activated protein kinase 4 [Source:MGI Symbol;Acc:MGI:2444559]	ENSMUST00000091851,ENSMUST00000159162,ENSMUST00000160601,ENSMUST00000162863	2.9817	85	4.74576	131	4.67806	115	3.22733	111	1.86996	39	2.31172	67	2.85595	51
ENSMUSG00000113450	Gm49359	10.2864	11.4361	8.75345	1.38988	0.474965	0.00503099	0.274506	13	62453016	62466832	-1	protein_coding	predicted gene, 49359 [Source:MGI Symbol;Acc:MGI:6121568]	ENSMUST00000221747,ENSMUST00000221951,ENSMUST00000223247	9.15559	261	14.2373	393	10.9833	270	11.3683	391	9.87725	206	8.03925	233	8.34384	149
ENSMUSG00000042284	Itga1	138.05	147.776	125.082	1.20026	0.263342	0.00512587	0.27865	13	114953096	115101964	-1	protein_coding	integrin alpha 1 [Source:MGI Symbol;Acc:MGI:96599]	ENSMUST00000061673,ENSMUST00000224119,ENSMUST00000224268,ENSMUST00000224493,ENSMUST00000224541,ENSMUST00000224865	140.175	3996	145.054	4004	145.264	3571	160.611	5524	126.438	2637	125.385	3634	123.422	2204
ENSMUSG00000083411	Rpl30-ps10	9.01496	13.4507	3.10063	19.7404	4.30308	0.00516435	0.278955	X	71803688	71804034	1	processed_pseudogene	ribosomal protein L30, pseudogene 10 [Source:MGI Symbol;Acc:MGI:3646270]	ENSMUST00000117119	17.7499	506	27.7138	765	8.33915	205	0	0	9.30188	194	0	0	0	0
ENSMUSG00000000093	Tbx2	41.4914	45.502	36.1438	1.33261	0.414251	0.00518054	0.278955	11	85832551	85841948	1	protein_coding	T-box 2 [Source:MGI Symbol;Acc:MGI:98494]	ENSMUST00000000095	40.7967	1163	44.487	1228	48.6925	1197	48.032	1652	45.2627	944	26.1534	758	37.0153	661
ENSMUSG00000096519	Gm10721	1.02128	1.35874	0.571327	3.15027	1.65547	0.00518827	0.278955	9	3013140	3014344	1	protein_coding	predicted gene 10721 [Source:MGI Symbol;Acc:MGI:3641688]	ENSMUST00000143083	0.280631	8	3.55026	98	1.3424	33	0.261675	9	0.575374	12	1.13861	33	0	0
ENSMUSG00000034903	Cobll1	18.2174	20.0032	15.8363	1.34969	0.432628	0.00525913	0.281737	2	65088339	65239403	-1	protein_coding	Cobl-like 1 [Source:MGI Symbol;Acc:MGI:2442894]	ENSMUST00000090896,ENSMUST00000102726,ENSMUST00000112429,ENSMUST00000112430,ENSMUST00000112431,ENSMUST00000124769,ENSMUST00000132478,ENSMUST00000132979,ENSMUST00000136537,ENSMUST00000155082,ENSMUST00000155768,ENSMUST00000155916,ENSMUST00000156643	15.6452	446	22.5695	623	18.3054	450	23.4926	808	14.2884	298	17.5966	510	15.6237	279
ENSMUSG00000031737	Irx5	4.8831	3.40838	6.84939	-1.95435	-0.966687	0.00528331	0.282006	8	92357625	92376286	1	protein_coding	Iroquois homeobox 5 [Source:MGI Symbol;Acc:MGI:1859086]	ENSMUST00000034184,ENSMUST00000210246	4.20946	120	3.29667	91	2.52208	62	3.60531	124	3.97967	83	11.6966	339	4.87191	87
ENSMUSG00000071637	Cebpd	9.81098	8.51551	11.5383	-1.39874	-0.484123	0.00534539	0.28429	16	15887286	15891031	1	protein_coding	CCAAT/enhancer binding protein (C/EBP), delta [Source:MGI Symbol;Acc:MGI:103573]	ENSMUST00000096232,ENSMUST00000210772	9.26082	264	7.57148	209	9.23408	227	7.99564	275	11.5075	240	11.6276	337	11.4798	205
ENSMUSG00000025854	Fam20c	20.8328	22.8671	18.1203	1.28662	0.363589	0.00538418	0.285323	5	138754514	138810077	1	protein_coding	family with sequence similarity 20, member C [Source:MGI Symbol;Acc:MGI:2136853]	ENSMUST00000026972,ENSMUST00000159176,ENSMUST00000160645,ENSMUST00000160988,ENSMUST00000161641,ENSMUST00000197027	21.5735	615	24.0186	663	24.4479	601	21.4283	737	19.6586	410	17.7347	514	16.9677	303
ENSMUSG00000075014	Gm10800	2.13071	3.11992	0.81178	3.07331	1.61979	0.00540642	0.285475	2	98666547	98667301	-1	protein_coding	predicted gene 10800 [Source:MGI Symbol;Acc:MGI:3641657]	ENSMUST00000099683	0.806814	23	9.38284	259	1.70851	42	0.581501	20	0.719217	15	1.38013	40	0.335994	6
ENSMUSG00000004655	Aqp1	60.4549	65.9695	53.1021	1.27303	0.34827	0.00548423	0.288549	6	55336432	55348555	1	protein_coding	aquaporin 1 [Source:MGI Symbol;Acc:MGI:103201]	ENSMUST00000004774	62.6158	1785	60.282	1664	70.0081	1721	70.9722	2441	63.8665	1332	45.9928	1333	49.4471	883
ENSMUSG00000063063	Ctnna2	3.28773	2.57673	4.23572	-1.70527	-0.770004	0.00563287	0.295315	6	76881637	77979699	-1	protein_coding	catenin (cadherin associated protein), alpha 2 [Source:MGI Symbol;Acc:MGI:88275]	ENSMUST00000075340,ENSMUST00000159626,ENSMUST00000160252,ENSMUST00000160894,ENSMUST00000161846,ENSMUST00000162273,ENSMUST00000162991,ENSMUST00000204527	2.91155	83	2.20986	61	2.27801	56	2.90751	100	3.45224	72	5.27899	153	3.97593	71
ENSMUSG00000038725	Pkhd1l1	25.3617	27.1767	22.9417	1.29399	0.371827	0.00566436	0.295913	15	44457494	44601369	1	protein_coding	polycystic kidney and hepatic disease 1-like 1 [Source:MGI Symbol;Acc:MGI:2183153]	ENSMUST00000038336,ENSMUST00000166957,ENSMUST00000209244,ENSMUST00000209939,ENSMUST00000231867,ENSMUST00000232355	19.574	558	29.5614	816	23.431	576	36.1403	1243	18.412	384	21.9095	635	28.5035	509
ENSMUSG00000096935	1700113A16Rik	1.11641	0.757646	1.59476	-2.17824	-1.12316	0.00573375	0.298479	3	88171556	88177785	-1	lncRNA	RIKEN cDNA 1700113A16 gene [Source:MGI Symbol;Acc:MGI:1923892]	ENSMUST00000181837,ENSMUST00000197172,ENSMUST00000200006	0.876972	25	0.543408	15	0.854254	21	0.755951	26	1.1987	25	1.34563	39	2.23996	40
ENSMUSG00000030849	Fgfr2	55.3481	52.2603	59.4651	-1.20848	-0.27319	0.00583351	0.302603	7	130162451	133123350	-1	protein_coding	fibroblast growth factor receptor 2 [Source:MGI Symbol;Acc:MGI:95523]	ENSMUST00000117073,ENSMUST00000117089,ENSMUST00000117357,ENSMUST00000117691,ENSMUST00000117754,ENSMUST00000117858,ENSMUST00000117872,ENSMUST00000118296,ENSMUST00000119260,ENSMUST00000120141,ENSMUST00000120187,ENSMUST00000120715,ENSMUST00000121064,ENSMUST00000121080,ENSMUST00000122054,ENSMUST00000122448,ENSMUST00000124096,ENSMUST00000127091,ENSMUST00000129103,ENSMUST00000129542,ENSMUST00000130557,…	61.2477	1746	45.9723	1269	44.3398	1090	57.4814	1977	62.3801	1301	51.1683	1483	64.8468	1158
ENSMUSG00000040998	Npnt	63.3814	67.7105	57.6094	1.20758	0.272119	0.00585764	0.302788	3	132881745	132950291	-1	protein_coding	nephronectin [Source:MGI Symbol;Acc:MGI:2148811]	ENSMUST00000042729,ENSMUST00000042744,ENSMUST00000093971,ENSMUST00000117164,ENSMUST00000117456,ENSMUST00000117811,ENSMUST00000132732	63.0017	1796	69.5924	1921	69.1946	1701	69.0532	2375	49.6739	1036	62.8994	1823	60.2549	1076
ENSMUSG00000026614	Slc30a10	5.59357	6.17816	4.81412	1.50646	0.591159	0.00600112	0.309121	1	185454848	185468762	1	protein_coding	solute carrier family 30, member 10 [Source:MGI Symbol;Acc:MGI:2685058]	ENSMUST00000061093,ENSMUST00000238198,ENSMUST00000238677	3.47281	99	5.8688	162	5.97978	147	9.39124	323	3.54814	74	3.72635	108	7.16787	128
ENSMUSG00000029648	Flt1	62.2805	67.5411	55.2664	1.20518	0.269254	0.0061439	0.315373	5	147561604	147726011	-1	protein_coding	FMS-like tyrosine kinase 1 [Source:MGI Symbol;Acc:MGI:95558]	ENSMUST00000031652,ENSMUST00000031653,ENSMUST00000110529,ENSMUST00000125272,ENSMUST00000142477,ENSMUST00000200895	69.9122	1993	58.036	1602	74.2387	1825	67.9775	2338	55.14	1150	60.4842	1753	50.1751	896
ENSMUSG00000047216	Cdh19	4.67632	4.05876	5.49974	-1.55383	-0.63583	0.00619821	0.316657	1	110888326	110977584	-1	protein_coding	cadherin 19, type 2 [Source:MGI Symbol;Acc:MGI:3588198]	ENSMUST00000094626,ENSMUST00000187555	5.6477	161	3.47781	96	3.41702	84	3.69253	127	6.13732	128	5.20999	151	5.1519	92
ENSMUSG00000024868	Dkk1	11.0778	9.96933	12.5557	-1.39778	-0.48314	0.00621439	0.316657	19	30545863	30549665	-1	protein_coding	dickkopf WNT signaling pathway inhibitor 1 [Source:MGI Symbol;Acc:MGI:1329040]	ENSMUST00000025803	12.7336	363	7.42657	205	11.4307	281	8.28639	285	10.4526	218	13.2147	383	13.9997	250
ENSMUSG00000052581	Lrrtm4	7.81826	9.15952	6.02991	1.54315	0.625882	0.00623923	0.316657	6	80018877	80810143	1	protein_coding	leucine rich repeat transmembrane neuronal 4 [Source:MGI Symbol;Acc:MGI:2389180]	ENSMUST00000074662,ENSMUST00000126005,ENSMUST00000126399,ENSMUST00000128718,ENSMUST00000133918,ENSMUST00000136421,ENSMUST00000145407,ENSMUST00000147663	9.33098	266	8.36848	231	10.3324	254	8.60622	296	5.56195	116	4.51992	131	8.00785	143
ENSMUSG00000024008	Cpne5	9.09219	10.0121	7.86565	1.40259	0.488093	0.00627333	0.316657	17	29155556	29238167	-1	protein_coding	copine V [Source:MGI Symbol;Acc:MGI:2385908]	ENSMUST00000024805,ENSMUST00000124917,ENSMUST00000126755,ENSMUST00000126993,ENSMUST00000137727,ENSMUST00000234042,ENSMUST00000234157	6.87546	196	12.752	352	11.146	274	9.27494	319	8.77445	183	7.03866	204	7.78385	139
ENSMUSG00000026686	Lmx1a	3.51492	4.04287	2.81099	1.65286	0.724964	0.0062764	0.316657	1	167689237	167848741	1	protein_coding	LIM homeobox transcription factor 1 alpha [Source:MGI Symbol;Acc:MGI:1888519]	ENSMUST00000028003,ENSMUST00000111377	2.77123	79	3.11554	86	3.13226	77	7.15246	246	1.91791	40	1.58715	46	4.92791	88
ENSMUSG00000034189	Hsdl1	25.1957	22.9844	28.144	-1.24259	-0.313352	0.0063247	0.317214	8	119561989	119575183	-1	protein_coding	hydroxysteroid dehydrogenase like 1 [Source:MGI Symbol;Acc:MGI:1919802]	ENSMUST00000036049,ENSMUST00000212065,ENSMUST00000212198,ENSMUST00000212517	23.9939	684	22.7869	629	22.1292	544	23.0274	792	28.8646	602	27.5681	799	27.9995	500
ENSMUSG00000028451	1700022I11Rik	1.69872	1.20584	2.3559	-1.94479	-0.959614	0.00633143	0.317214	4	42969604	42983640	1	protein_coding	RIKEN cDNA 1700022I11 gene [Source:MGI Symbol;Acc:MGI:1914567]	ENSMUST00000030163,ENSMUST00000139127,ENSMUST00000185904,ENSMUST00000189414,ENSMUST00000190902	1.19268	34	1.34041	37	1.30172	32	0.988552	34	2.25355	47	2.07019	60	2.74395	49
ENSMUSG00000084416	Rpl10a-ps1	49.9477	41.7381	60.8938	-1.41199	-0.497729	0.00635204	0.317214	1	64993951	64994604	-1	processed_pseudogene	ribosomal protein L10A, pseudogene 1 [Source:MGI Symbol;Acc:MGI:3705885]	ENSMUST00000120360	33.0092	941	39.9586	1103	32.0549	788	61.9299	2130	65.7844	1372	64.314	1864	52.583	939
ENSMUSG00000074971	Fibin	9.00469	7.73664	10.6954	-1.48165	-0.567208	0.00648166	0.322437	2	110360917	110363183	-1	protein_coding	fin bud initiation factor homolog (zebrafish) [Source:MGI Symbol;Acc:MGI:1914856]	ENSMUST00000099626	8.69956	248	4.85444	134	9.1934	226	8.19916	282	10.5485	220	10.282	298	11.2558	201
ENSMUSG00000059325	Hopx	34.5768	27.4875	44.0292	-1.40515	-0.49072	0.0065004	0.322437	5	77086988	77115121	-1	protein_coding	HOP homeobox [Source:MGI Symbol;Acc:MGI:1916782]	ENSMUST00000081964,ENSMUST00000113453,ENSMUST00000120827	18.2761	521	34.3434	948	26.6853	656	30.6451	1054	35.7691	746	59.8631	1735	36.4553	651
ENSMUSG00000042258	Isl1	47.2262	54.0192	38.1689	1.26887	0.343541	0.00658167	0.325373	13	116298281	116309689	-1	protein_coding	ISL1 transcription factor, LIM/homeodomain [Source:MGI Symbol;Acc:MGI:101791]	ENSMUST00000036060,ENSMUST00000176044,ENSMUST00000176444,ENSMUST00000176812,ENSMUST00000177469	70.5436	2011	47.7837	1319	55.4451	1363	42.3042	1455	37.5431	783	34.5722	1002	42.3912	757
ENSMUSG00000105072	Gm44335	0.814503	0.516137	1.21232	-2.44764	-1.29139	0.00661926	0.326137	9	44334965	44335105	-1	miRNA	predicted gene, 44335 [Source:MGI Symbol;Acc:MGI:5690727]	ENSMUST00000196879	0.526183	15	0.25359	7	0.528824	13	0.755951	26	1.05485	22	1.51814	44	1.06398	19
ENSMUSG00000001911	Nfix	44.552	41.029	49.2493	-1.23008	-0.298757	0.00665898	0.327	8	84699876	84800344	-1	protein_coding	nuclear factor I/X [Source:MGI Symbol;Acc:MGI:97311]	ENSMUST00000076715,ENSMUST00000099070,ENSMUST00000109762,ENSMUST00000109764,ENSMUST00000126806,ENSMUST00000132236,ENSMUST00000148644,ENSMUST00000148746	44.2695	1262	37.4951	1035	37.3431	918	45.0082	1548	54.6605	1140	42.1284	1221	50.959	910
ENSMUSG00000076441	Ass1	25.4468	28.1154	21.8887	1.2614	0.335029	0.00683853	0.334702	2	31470207	31520672	1	protein_coding	argininosuccinate synthetase 1 [Source:MGI Symbol;Acc:MGI:88090]	ENSMUST00000102840,ENSMUST00000126474,ENSMUST00000130195,ENSMUST00000192802	29.4312	839	24.7432	683	30.7531	756	27.5341	947	22.3916	467	21.323	618	21.9516	392
ENSMUSG00000021186	Fbln5	189.081	189.145	188.996	-1.25303	-0.325418	0.00689931	0.336558	12	101746565	101819055	-1	protein_coding	fibulin 5 [Source:MGI Symbol;Acc:MGI:1346091]	ENSMUST00000021603,ENSMUST00000221373,ENSMUST00000222587	293.365	8363	102.668	2834	183.217	4504	177.329	6099	160.337	3344	185.903	5388	220.748	3942
ENSMUSG00000029866	Kel	9.74677	10.6369	8.55988	1.39727	0.482613	0.00699836	0.340196	6	41686330	41704339	-1	protein_coding	Kell blood group [Source:MGI Symbol;Acc:MGI:1346053]	ENSMUST00000031899,ENSMUST00000141502,ENSMUST00000153760,ENSMUST00000192118,ENSMUST00000194597	6.62991	189	9.23793	255	8.01372	197	18.6662	642	5.70579	119	6.59012	191	13.3837	239
ENSMUSG00000033813	Tcea1	103.873	109.759	96.0242	1.19267	0.254193	0.00702007	0.340196	1	4857814	4897909	1	protein_coding	transcription elongation factor A (SII) 1 [Source:MGI Symbol;Acc:MGI:1196624]	ENSMUST00000081551,ENSMUST00000165720	95.9407	2735	119.405	3296	110.443	2715	113.247	3895	89.087	1858	105.131	3047	93.8542	1676
ENSMUSG00000033022	Cdo1	42.8527	47.1082	37.1788	1.20995	0.274947	0.007116	0.342748	18	46713193	46728395	-1	protein_coding	cysteine dioxygenase 1, cytosolic [Source:MGI Symbol;Acc:MGI:105925]	ENSMUST00000035804,ENSMUST00000234064,ENSMUST00000234179,ENSMUST00000234222,ENSMUST00000234819	53.6707	1530	43.0017	1187	45.5602	1120	46.2003	1589	33.8032	705	40.4378	1172	37.2953	666
ENSMUSG00000039452	Snx22	6.8148	5.34849	8.76988	-1.57821	-0.658291	0.00711926	0.342748	9	66065176	66069719	-1	protein_coding	sorting nexin 22 [Source:MGI Symbol;Acc:MGI:2685966]	ENSMUST00000044711,ENSMUST00000214332	4.80581	137	4.16613	115	7.15946	176	5.26258	181	7.19217	150	7.24568	210	11.8718	212
ENSMUSG00000036030	Prtg	30.438	33.4918	26.3663	1.25212	0.324377	0.00716451	0.343304	9	72806874	72917291	1	protein_coding	protogenin [Source:MGI Symbol;Acc:MGI:2444710]	ENSMUST00000055535,ENSMUST00000184274	34.5527	985	34.3796	949	36.3668	894	28.668	986	26.3713	550	26.464	767	26.2635	469
ENSMUSG00000030313	Dennd5b	62.0387	67.4448	54.8305	1.18702	0.24735	0.00717741	0.343304	6	148988071	149101680	-1	protein_coding	DENN/MADD domain containing 5B [Source:MGI Symbol;Acc:MGI:2444273]	ENSMUST00000111557,ENSMUST00000127727,ENSMUST00000129539,ENSMUST00000145555,ENSMUST00000150436,ENSMUST00000204030,ENSMUST00000204583	74.2971	2118	59.7386	1649	66.0216	1623	69.722	2398	52.2152	1089	58.5175	1696	53.759	960
ENSMUSG00000049119	Fam110b	23.0763	21.3481	25.3807	-1.2768	-0.352535	0.00722576	0.343946	4	5644090	6108223	1	protein_coding	family with sequence similarity 110, member B [Source:MGI Symbol;Acc:MGI:1916593]	ENSMUST00000054857,ENSMUST00000108380,ENSMUST00000124256,ENSMUST00000126564,ENSMUST00000141479,ENSMUST00000144605,ENSMUST00000145365,ENSMUST00000156582,ENSMUST00000171403	25.6427	731	17.3891	480	20.7868	511	21.5737	742	25.7959	538	23.6347	685	26.7115	477
ENSMUSG00000064360	mt-Nd3	213.685	235.14	185.077	1.31648	0.396688	0.00723752	0.343946	MT	9459	9806	1	protein_coding	mitochondrially encoded NADH dehydrogenase 3 [Source:MGI Symbol;Acc:MGI:102499]	ENSMUST00000082411	216.016	6158	260.8	7199	207.624	5104	256.122	8809	164.749	3436	229.205	6643	161.277	2880
ENSMUSG00000032548	Slco2a1	7.78044	6.5674	9.39783	-1.47466	-0.56038	0.00737475	0.347469	9	102988712	103096002	1	protein_coding	solute carrier organic anion transporter family, member 2a1 [Source:MGI Symbol;Acc:MGI:1346021]	ENSMUST00000035148,ENSMUST00000185215,ENSMUST00000188664,ENSMUST00000190892	7.36656	210	6.04994	167	6.02046	148	6.83264	235	8.67855	181	11.7311	340	7.78385	139
ENSMUSG00000047061	Gm9817	5.96591	4.61622	7.76549	-1.52164	-0.605627	0.00738214	0.347469	13	45078692	45081222	1	TEC	predicted gene 9817 [Source:MGI Symbol;Acc:MGI:3809102]	ENSMUST00000054395	3.40265	97	4.85444	134	5.20688	128	5.00091	172	8.63061	180	5.76204	167	8.90383	159
ENSMUSG00000024011	Pi16	18.7328	21.1051	15.5699	1.32463	0.405587	0.00738589	0.347469	17	29317680	29330593	1	protein_coding	peptidase inhibitor 16 [Source:MGI Symbol;Acc:MGI:1921366]	ENSMUST00000114699,ENSMUST00000114701,ENSMUST00000135754,ENSMUST00000155348,ENSMUST00000234618,ENSMUST00000234782	22.3803	638	17.5702	485	23.1869	570	21.2829	732	15.5351	324	14.3188	415	16.8557	301
ENSMUSG00000056673	Kdm5d	26.0881	33.411	16.3242	1.84646	0.884763	0.007406	0.347469	Y	897788	956786	1	protein_coding	lysine (K)-specific demethylase 5D [Source:MGI Symbol;Acc:MGI:99780]	ENSMUST00000055032,ENSMUST00000185542,ENSMUST00000186696,ENSMUST00000186726,ENSMUST00000187296,ENSMUST00000188910,ENSMUST00000189069,ENSMUST00000189626,ENSMUST00000189955	42.5858	1214	16.9906	469	41.9398	1031	32.1279	1105	22.3916	467	9.55739	277	17.0237	304
ENSMUSG00000058620	Adra2b	5.14809	5.92663	4.11003	1.55924	0.64084	0.00748853	0.350225	2	127363208	127367221	1	protein_coding	adrenergic receptor, alpha 2b [Source:MGI Symbol;Acc:MGI:87935]	ENSMUST00000071902,ENSMUST00000104934	4.56025	130	4.9269	136	6.42724	158	7.79211	268	4.21941	88	3.07079	89	5.03991	90
ENSMUSG00000056755	Grm7	0.880414	0.603044	1.25024	-2.20905	-1.14343	0.00752391	0.350767	6	110645581	111567230	1	protein_coding	glutamate receptor, metabotropic 7 [Source:MGI Symbol;Acc:MGI:1351344]	ENSMUST00000071076,ENSMUST00000172951,ENSMUST00000173001,ENSMUST00000174018,ENSMUST00000174310	0.701577	20	0.507181	14	0.447466	11	0.755951	26	1.24664	26	1.1041	32	1.39997	25
ENSMUSG00000041482	Piezo2	29.1801	33.0825	23.9768	1.26622	0.340526	0.00769389	0.354539	18	63010213	63387183	-1	protein_coding	piezo-type mechanosensitive ion channel component 2 [Source:MGI Symbol;Acc:MGI:1918781]	ENSMUST00000046860,ENSMUST00000047480,ENSMUST00000123322,ENSMUST00000132576,ENSMUST00000137141,ENSMUST00000182166,ENSMUST00000182177,ENSMUST00000182233,ENSMUST00000183217,ENSMUST00000235366,ENSMUST00000235659,ENSMUST00000236438,ENSMUST00000237812,ENSMUST00000238051,ENSMUST00000238156	39.9899	1140	23.1129	638	36.8956	907	32.3315	1112	22.008	459	25.8429	749	24.0795	430
ENSMUSG00000079277	Hoxd3	7.7149	6.57162	9.23927	-1.67356	-0.74292	0.00777196	0.354539	2	74711927	74748442	1	protein_coding	homeobox D3 [Source:MGI Symbol;Acc:MGI:96207]	ENSMUST00000047830,ENSMUST00000111982,ENSMUST00000111983,ENSMUST00000140666,ENSMUST00000144544,ENSMUST00000190553	8.20846	234	2.64458	73	8.33915	205	7.09431	244	9.11008	190	9.5919	278	9.01583	161
ENSMUSG00000025742	Prps2	69.6519	73.8537	64.0495	1.17341	0.230705	0.00777963	0.354539	X	167346322	167382749	-1	protein_coding	phosphoribosyl pyrophosphate synthetase 2 [Source:MGI Symbol;Acc:MGI:97776]	ENSMUST00000026839,ENSMUST00000145456	70.0174	1996	76.0409	2099	75.0116	1844	74.3449	2557	66.5036	1387	63.4859	1840	62.1588	1110
ENSMUSG00000030048	Gkn3	6.72259	5.63356	8.17463	-1.58085	-0.660703	0.00778964	0.354539	6	87383256	87388935	-1	protein_coding	gastrokine 3 [Source:MGI Symbol;Acc:MGI:1916138]	ENSMUST00000032127	6.91054	197	4.02122	111	6.63064	163	4.97183	171	9.25393	193	6.59012	191	8.67984	155
ENSMUSG00000099021	Rn7s1	7.79581	6.20712	9.91407	-1.79295	-0.842339	0.0077906	0.354539	12	69159295	69159594	1	misc_RNA	7S RNA 1 [Source:MGI Symbol;Acc:MGI:97950]	ENSMUST00000174924	7.71735	220	5.43408	150	8.21711	202	3.45993	119	11.2198	234	6.76263	196	11.7598	210
ENSMUSG00000073400	Trim10	7.36247	7.97041	6.55188	1.49924	0.58423	0.00779802	0.354539	17	36869574	36877833	1	protein_coding	tripartite motif-containing 10 [Source:MGI Symbol;Acc:MGI:1338757]	ENSMUST00000060524	5.12152	146	5.94126	164	7.24082	178	13.578	467	3.64403	76	3.69185	107	12.3198	220
ENSMUSG00000099250	Rn7s2	7.79581	6.20712	9.91407	-1.79296	-0.842341	0.00779888	0.354539	12	69361182	69361481	-1	misc_RNA	7S RNA 2 [Source:MGI Symbol;Acc:MGI:97953]	ENSMUST00000175032	7.71735	220	5.43408	150	8.21711	202	3.45993	119	11.2198	234	6.76263	196	11.7598	210
ENSMUSG00000033342	Plppr5	33.9978	36.1186	31.1702	1.23695	0.306792	0.00781677	0.354539	3	117485084	117689507	1	protein_coding	phospholipid phosphatase related 5 [Source:MGI Symbol;Acc:MGI:1923019]	ENSMUST00000039564,ENSMUST00000106473,ENSMUST00000238937,ENSMUST00000239347	29.3259	836	41.7337	1152	35.8787	882	37.5359	1291	33.2278	693	26.2915	762	33.9914	607
ENSMUSG00000046110	Serinc4	2.22024	1.63539	3.00005	-1.86179	-0.896687	0.00782297	0.354539	2	121439059	121456781	-1	protein_coding	serine incorporator 4 [Source:MGI Symbol;Acc:MGI:2441842]	ENSMUST00000056312,ENSMUST00000110613,ENSMUST00000126678,ENSMUST00000127435,ENSMUST00000140135,ENSMUST00000140752	1.50839	43	0.90568	25	1.83054	45	2.29693	79	2.78097	58	2.69125	78	3.52793	63
ENSMUSG00000024899	Papss2	118.661	106.628	134.704	-1.22709	-0.295236	0.0078455	0.354539	19	32595790	32667187	1	protein_coding	3'-phosphoadenosine 5'-phosphosulfate synthase 2 [Source:MGI Symbol;Acc:MGI:1330223]	ENSMUST00000025833,ENSMUST00000235594,ENSMUST00000236290	101.869	2904	105.023	2899	100.354	2467	119.266	4102	162.351	3386	103.165	2990	138.597	2475
ENSMUSG00000032024	Clmp	82.3516	79.3113	86.4053	-1.18568	-0.245709	0.00789136	0.355521	9	40685962	40785319	1	protein_coding	CXADR-like membrane protein [Source:MGI Symbol;Acc:MGI:1918816]	ENSMUST00000034522,ENSMUST00000134153,ENSMUST00000139577,ENSMUST00000141759	97.4842	2779	64.0859	1769	69.8454	1717	85.8296	2952	86.2102	1798	80.0475	2320	92.9583	1660
ENSMUSG00000033491	Prss35	42.5263	40.1673	45.6717	-1.20306	-0.266711	0.00802595	0.360483	9	86743649	86758443	1	protein_coding	protease, serine 35 [Source:MGI Symbol;Acc:MGI:2444800]	ENSMUST00000036426,ENSMUST00000179574	46.4795	1325	35.9011	991	34.6176	851	43.6707	1502	44.112	920	42.784	1240	50.1191	895
ENSMUSG00000048826	Dact2	8.78819	7.75994	10.1592	-1.38647	-0.471421	0.00814028	0.363645	17	14195052	14204304	-1	protein_coding	dishevelled-binding antagonist of beta-catenin 2 [Source:MGI Symbol;Acc:MGI:1920347]	ENSMUST00000053218,ENSMUST00000232816	9.05035	258	6.81071	188	6.63064	163	8.54807	294	10.1649	212	8.83283	256	11.4798	205
ENSMUSG00000045573	Penk	41.2465	38.6654	44.688	-1.34921	-0.432119	0.00814572	0.363645	4	4133531	4138819	-1	protein_coding	preproenkephalin [Source:MGI Symbol;Acc:MGI:104629]	ENSMUST00000070375,ENSMUST00000133567	54.3372	1549	26.5183	732	42.1432	1036	31.6627	1089	52.1672	1088	39.0577	1132	42.8392	765
ENSMUSG00000018217	Pmp22	109.3	118.226	97.399	1.17711	0.235251	0.00822981	0.366289	11	63128982	63159547	1	protein_coding	peripheral myelin protein 22 [Source:MGI Symbol;Acc:MGI:97631]	ENSMUST00000018361,ENSMUST00000108700,ENSMUST00000108701,ENSMUST00000108702,ENSMUST00000140648	129.652	3696	114.297	3155	113.412	2788	115.544	3974	88.8473	1853	98.5757	2857	104.774	1871
ENSMUSG00000039943	Plcb4	43.1698	45.8306	39.6221	1.21372	0.279431	0.008274	0.366555	2	135659011	136014593	1	protein_coding	phospholipase C, beta 4 [Source:MGI Symbol;Acc:MGI:107464]	ENSMUST00000035646,ENSMUST00000110109,ENSMUST00000127044,ENSMUST00000127729,ENSMUST00000132686,ENSMUST00000134310,ENSMUST00000137969,ENSMUST00000139480,ENSMUST00000141025,ENSMUST00000144931,ENSMUST00000146018,ENSMUST00000147122,ENSMUST00000147744,ENSMUST00000150072,ENSMUST00000184371	38.7972	1106	53.1815	1468	42.8754	1054	48.4681	1667	43.2969	903	39.5062	1145	36.0633	644
ENSMUSG00000113471	Gm48116	4.84343	3.78217	6.25845	-1.51107	-0.595574	0.00828557	0.366555	13	61709556	61711238	1	lncRNA	predicted gene, 48116 [Source:MGI Symbol;Acc:MGI:6097471]	ENSMUST00000220710	2.80631	80	4.16613	115	3.41702	84	4.73923	163	5.94553	124	4.93396	143	7.89585	141
ENSMUSG00000057315	Arhgap24	11.1734	12.5923	9.28146	1.39204	0.4772	0.00835377	0.368466	5	102481391	102897937	1	protein_coding	Rho GTPase activating protein 24 [Source:MGI Symbol;Acc:MGI:1922647]	ENSMUST00000070000,ENSMUST00000073302,ENSMUST00000094559,ENSMUST00000112852,ENSMUST00000112853,ENSMUST00000112854,ENSMUST00000126125,ENSMUST00000130222	11.6462	332	14.8894	411	12.2036	300	11.63	400	8.7265	182	11.11	322	8.00785	143
ENSMUSG00000069911	Insyn2b	3.46116	4.11377	2.59101	1.60986	0.686939	0.00841995	0.370277	11	34314758	34422640	1	protein_coding	inhibitory synaptic factor family member 2B [Source:MGI Symbol;Acc:MGI:3643491]	ENSMUST00000093192,ENSMUST00000165963	3.99899	114	4.49217	124	4.06788	100	3.89606	134	2.87687	60	2.20821	64	2.68795	48
ENSMUSG00000027500	Stmn2	19.6567	21.9678	16.5751	1.31407	0.394041	0.00851679	0.372289	3	8509360	8561606	1	protein_coding	stathmin-like 2 [Source:MGI Symbol;Acc:MGI:98241]	ENSMUST00000029002,ENSMUST00000191847,ENSMUST00000194307,ENSMUST00000194905	22.8714	652	19.78	546	23.4716	577	21.7481	748	16.6858	348	14.1118	409	18.9276	338
ENSMUSG00000025453	Nnt	37.3485	41.6445	31.6204	1.25138	0.323518	0.00856494	0.372289	13	119335448	119408997	-1	protein_coding	nicotinamide nucleotide transhydrogenase [Source:MGI Symbol;Acc:MGI:109279]	ENSMUST00000069902,ENSMUST00000099149,ENSMUST00000109204,ENSMUST00000133627,ENSMUST00000144599	46.4444	1324	32.8581	907	38.8075	954	48.4681	1667	30.5907	638	32.295	936	31.9754	571
ENSMUSG00000025400	Tac2	2.6381	3.23328	1.84453	1.6959	0.762049	0.00856748	0.372289	10	127724478	127731768	1	protein_coding	tachykinin 2 [Source:MGI Symbol;Acc:MGI:98476]	ENSMUST00000026466,ENSMUST00000179960,ENSMUST00000217729,ENSMUST00000218048	3.54297	101	3.3329	92	3.09159	76	2.96566	102	1.86996	39	1.75966	51	1.90396	34
ENSMUSG00000022321	Cdh10	7.08149	6.34017	8.06991	-1.44275	-0.528824	0.0085725	0.372289	15	18818947	19014236	1	protein_coding	cadherin 10 [Source:MGI Symbol;Acc:MGI:107436]	ENSMUST00000040562,ENSMUST00000166873,ENSMUST00000176146,ENSMUST00000176409,ENSMUST00000176593,ENSMUST00000176801	8.48909	242	4.74576	131	6.63064	163	5.49518	189	7.67165	160	7.97025	231	8.56784	153
ENSMUSG00000002020	Ltbp2	1.63417	2.07348	1.04842	2.12011	1.08414	0.00862353	0.372289	12	84783212	84876532	-1	protein_coding	latent transforming growth factor beta binding protein 2 [Source:MGI Symbol;Acc:MGI:99502]	ENSMUST00000002073,ENSMUST00000110254,ENSMUST00000163189,ENSMUST00000163214,ENSMUST00000165141,ENSMUST00000166383,ENSMUST00000168699	2.06965	59	1.9925	55	2.40005	59	1.83173	63	0.719217	15	0.690065	20	1.73597	31
ENSMUSG00000048004	Tmem196	1.24818	0.906905	1.70321	-2.00848	-1.00611	0.00865855	0.372289	12	119945822	120021246	1	protein_coding	transmembrane protein 196 [Source:MGI Symbol;Acc:MGI:2685374]	ENSMUST00000058644,ENSMUST00000183694,ENSMUST00000184069,ENSMUST00000184209,ENSMUST00000184820,ENSMUST00000223374	1.08745	31	1.08682	30	0.610181	15	0.843176	29	1.77407	37	1.20761	35	2.12796	38
ENSMUSG00000025921	Rdh10	10.5024	12.2058	8.23111	1.37924	0.463872	0.0086756	0.372289	1	16105774	16133734	1	protein_coding	retinol dehydrogenase 10 (all-trans) [Source:MGI Symbol;Acc:MGI:1924238]	ENSMUST00000027053,ENSMUST00000152626	15.1541	432	10.2885	284	11.4307	281	11.9498	411	6.23322	130	8.66031	251	9.79982	175
ENSMUSG00000040260	Daam2	90.852	98.5186	80.6299	1.16908	0.225369	0.00868362	0.372289	17	49456022	49564343	-1	protein_coding	dishevelled associated activator of morphogenesis 2 [Source:MGI Symbol;Acc:MGI:1923691]	ENSMUST00000057610,ENSMUST00000224595,ENSMUST00000224954,ENSMUST00000226030	111.34	3174	90.7491	2505	95.3103	2343	96.6745	3325	83.0936	1733	77.5978	2249	81.1985	1450
ENSMUSG00000005465	Il27ra	3.99647	3.18174	5.08277	-1.59256	-0.671344	0.00875154	0.372289	8	84030294	84042589	-1	protein_coding	interleukin 27 receptor, alpha [Source:MGI Symbol;Acc:MGI:1355318]	ENSMUST00000005601,ENSMUST00000210245,ENSMUST00000210790	3.08694	88	3.94876	109	2.52208	62	3.16918	109	5.60989	117	5.3825	156	4.25592	76
ENSMUSG00000049313	Sorl1	57.2985	60.9025	52.4931	1.18541	0.245387	0.00875173	0.372289	9	41964720	42124297	-1	protein_coding	sortilin-related receptor, LDLR class A repeats-containing [Source:MGI Symbol;Acc:MGI:1202296]	ENSMUST00000060989,ENSMUST00000134560,ENSMUST00000139133,ENSMUST00000148800	56.9681	1624	55.971	1545	69.2352	1702	61.4356	2113	50.7288	1058	59.2075	1716	47.5431	849
ENSMUSG00000015533	Itga2	37.284	35.4986	39.6644	-1.25026	-0.32223	0.00875705	0.372289	13	114833081	114932100	-1	protein_coding	integrin alpha 2 [Source:MGI Symbol;Acc:MGI:96600]	ENSMUST00000056117,ENSMUST00000224204	46.4444	1324	27.1704	750	34.5363	849	33.8434	1164	41.4269	864	37.919	1099	39.6473	708
ENSMUSG00000020836	Coro6	56.3958	58.3088	53.8452	1.18071	0.239655	0.00876896	0.372289	11	77462411	77470484	1	protein_coding	coronin 6 [Source:MGI Symbol;Acc:MGI:2183448]	ENSMUST00000021190,ENSMUST00000052515,ENSMUST00000079770,ENSMUST00000102493,ENSMUST00000108391,ENSMUST00000130255	43.0769	1228	69.4113	1916	65.3301	1606	55.417	1906	61.7088	1287	54.4116	1577	45.4151	811
ENSMUSG00000041616	Nppa	39.1532	12.4814	74.7157	-3.08229	-1.624	0.00879754	0.372429	4	148000722	148002079	1	protein_coding	natriuretic peptide type A [Source:MGI Symbol;Acc:MGI:97367]	ENSMUST00000103230	3.26234	93	28.2572	780	6.63064	163	11.7754	405	32.0771	669	173.758	5036	18.3117	327
ENSMUSG00000030046	Bmp10	13.9701	3.46355	27.9789	-3.58212	-1.84081	0.00885038	0.373436	6	87428994	87437677	1	protein_coding	bone morphogenetic protein 10 [Source:MGI Symbol;Acc:MGI:1338820]	ENSMUST00000032125	0.63142	18	5.68767	157	1.74919	43	5.78594	199	6.13732	128	66.4877	1927	11.3118	202
ENSMUSG00000082938	Gm2810	2.43088	2.99082	1.68431	1.79999	0.847988	0.00890553	0.373436	5	40328438	40329427	1	processed_pseudogene	predicted pseudogene 2810 [Source:MGI Symbol;Acc:MGI:3780980]	ENSMUST00000118681	3.05186	87	2.02872	56	3.53905	87	3.34363	115	1.1987	25	2.62225	76	1.23198	22
ENSMUSG00000005087	Cd44	89.9757	95.4436	82.685	1.1713	0.228114	0.00892901	0.373436	2	102811141	102901665	-1	protein_coding	CD44 antigen [Source:MGI Symbol;Acc:MGI:88338]	ENSMUST00000005218,ENSMUST00000060516,ENSMUST00000099673,ENSMUST00000111190,ENSMUST00000111191,ENSMUST00000111192,ENSMUST00000111194,ENSMUST00000111198,ENSMUST00000124624	91.6962	2614	95.8209	2645	97.0595	2386	97.1979	3343	89.3268	1863	78.4258	2273	80.3025	1434
ENSMUSG00000115279	Gm49273	8.51907	9.42662	7.30902	1.43986	0.525926	0.00894429	0.373436	15	103657839	103661681	1	processed_pseudogene	predicted gene, 49273 [Source:MGI Symbol;Acc:MGI:6118757]	ENSMUST00000228191	5.22675	149	7.64394	211	9.1934	226	15.6424	538	7.19217	150	5.83105	169	8.90383	159
ENSMUSG00000039377	Hlx	1.50018	1.03581	2.11934	-1.99714	-0.997933	0.00894808	0.373436	1	184727140	184732619	-1	protein_coding	H2.0-like homeobox [Source:MGI Symbol;Acc:MGI:96109]	ENSMUST00000048572,ENSMUST00000174257	0.841893	24	1.08682	30	1.54579	38	0.668726	23	1.96586	41	2.20821	64	2.18396	39
ENSMUSG00000058447	Gm26920	3.65622	4.2823	2.82145	1.65168	0.723936	0.00899955	0.374524	7	30056034	30090410	-1	protein_coding	predicted gene, 26920 [Source:MGI Symbol;Acc:MGI:5504035]	ENSMUST00000182746	3.1571	90	5.39785	149	4.47466	110	4.09958	141	2.2056	46	3.34681	97	2.91195	52
ENSMUSG00000035403	Crb2	52.1365	55.7538	47.3133	1.18741	0.247816	0.00904951	0.375542	2	37776249	37799103	1	protein_coding	crumbs family member 2 [Source:MGI Symbol;Acc:MGI:2679260]	ENSMUST00000050372,ENSMUST00000137693,ENSMUST00000147600	54.4424	1552	57.9997	1601	52.801	1298	57.7721	1987	47.6601	994	44.8887	1301	49.3911	882
ENSMUSG00000021403	Serpinb9b	2.30066	2.71225	1.75188	1.83415	0.875115	0.00913651	0.376601	13	33027416	33041884	1	protein_coding	serine (or cysteine) peptidase inhibitor, clade B, member 9b [Source:MGI Symbol;Acc:MGI:894668]	ENSMUST00000006392,ENSMUST00000220566	1.47331	42	3.26045	90	3.29498	81	2.82028	97	1.34254	28	1.44914	42	2.46395	44
ENSMUSG00000109926	Gm45808	1.10106	1.40282	0.698713	2.12923	1.09033	0.00913684	0.376601	7	45465984	45486811	-1	protein_coding	predicted gene 45808 [Source:MGI Symbol;Acc:MGI:5804923]	ENSMUST00000210701	1.22776	35	1.26795	35	1.95258	48	1.163	40	0.863061	18	0.897084	26	0.335994	6
ENSMUSG00000028825	Rhd	6.56104	7.11513	5.82225	1.44438	0.530451	0.00917743	0.376601	4	134864536	134896172	1	protein_coding	Rh blood group, D antigen [Source:MGI Symbol;Acc:MGI:1202882]	ENSMUST00000030627,ENSMUST00000136163	3.61312	103	6.73826	186	7.11878	175	10.9904	378	4.60299	96	4.51992	131	8.34384	149
ENSMUSG00000023926	Rhag	3.57256	4.01617	2.98108	1.72944	0.790302	0.00921417	0.376601	17	40811126	40840754	1	protein_coding	Rhesus blood group-associated A glycoprotein [Source:MGI Symbol;Acc:MGI:1202713]	ENSMUST00000024721,ENSMUST00000233619,ENSMUST00000233740	2.45552	70	4.05745	112	3.62041	89	5.93131	204	2.1097	44	1.34563	39	5.4879	98
ENSMUSG00000003363	Pld3	68.9814	64.7051	74.6832	-1.1905	-0.251564	0.00922198	0.376601	7	27532000	27553218	-1	protein_coding	phospholipase D family, member 3 [Source:MGI Symbol;Acc:MGI:1333782]	ENSMUST00000117095,ENSMUST00000117611,ENSMUST00000127240,ENSMUST00000131106,ENSMUST00000142981,ENSMUST00000143903,ENSMUST00000150964,ENSMUST00000155287	70.9646	2023	59.485	1642	64.8419	1594	63.529	2185	81.8469	1707	70.0761	2031	72.1266	1288
ENSMUSG00000101174	Hoxd4	1.78881	1.31253	2.42385	-2.16459	-1.11409	0.0092576	0.376601	2	74711929	74729160	1	protein_coding	homeobox D4 [Source:MGI Symbol;Acc:MGI:96208]	ENSMUST00000047904,ENSMUST00000111980,ENSMUST00000144040	1.29792	37	0.289818	8	1.62715	40	2.03525	70	1.96586	41	2.44973	71	2.85595	51
ENSMUSG00000045382	Cxcr4	17.9122	19.7488	15.4633	1.28884	0.366075	0.00926306	0.376601	1	128588199	128592293	-1	protein_coding	chemokine (C-X-C motif) receptor 4 [Source:MGI Symbol;Acc:MGI:109563]	ENSMUST00000052172,ENSMUST00000142893	19.4337	554	21.4103	591	19.6885	484	18.4627	635	17.0215	355	13.3527	387	16.0157	286
ENSMUSG00000027748	Trpc4	1.17957	1.54438	0.693162	2.14296	1.0996	0.00927953	0.376601	3	54156035	54318471	1	protein_coding	transient receptor potential cation channel, subfamily C, member 4 [Source:MGI Symbol;Acc:MGI:109525]	ENSMUST00000029311,ENSMUST00000198444,ENSMUST00000199359,ENSMUST00000199399,ENSMUST00000200048,ENSMUST00000200341	1.8241	52	1.23172	34	1.46444	36	1.65728	57	0.958956	20	0.448542	13	0.671987	12
ENSMUSG00000017057	Il13ra1	35.8186	38.9194	31.6842	1.21867	0.285305	0.00937171	0.379297	X	36112110	36171259	1	protein_coding	interleukin 13 receptor, alpha 1 [Source:MGI Symbol;Acc:MGI:105052]	ENSMUST00000033418	39.8145	1135	38.437	1061	37.5058	922	39.92	1373	32.3648	675	30.8804	895	31.8074	568
ENSMUSG00000105704	Gm43055	3.80159	4.48613	2.88887	1.56979	0.650567	0.00941339	0.37994	5	86728906	86817106	1	lncRNA	predicted gene 43055 [Source:MGI Symbol;Acc:MGI:5663192]	ENSMUST00000198859	4.17439	119	6.37599	176	3.90516	96	3.48901	120	3.73993	78	2.51874	73	2.40795	43
ENSMUSG00000063286	Gm8995	6.66251	7.56689	5.45667	1.4377	0.523765	0.00953912	0.383962	7	106504239	106511671	-1	transcribed_unprocessed_pseudogene	predicted gene 8995 [Source:MGI Symbol;Acc:MGI:3644223]	ENSMUST00000184842,ENSMUST00000208417	6.73514	192	8.15112	225	8.05439	198	7.32691	252	4.98657	104	5.72754	166	5.65589	101
ENSMUSG00000034009	Rxfp1	17.741	18.9958	16.068	1.29645	0.374566	0.00981958	0.394086	3	79641611	79737880	-1	protein_coding	relaxin/insulin-like family peptide receptor 1 [Source:MGI Symbol;Acc:MGI:2682211]	ENSMUST00000078527,ENSMUST00000182491,ENSMUST00000183040,ENSMUST00000183199	13.0143	371	25.2141	696	21.3563	525	16.3983	564	18.412	384	14.5604	422	15.2317	272
ENSMUSG00000043633	Fam221b	9.71528	7.90415	12.1301	-1.44511	-0.531183	0.00984413	0.394086	4	43659622	43669145	-1	protein_coding	family with sequence similarity 221, member B [Source:MGI Symbol;Acc:MGI:2441678]	ENSMUST00000056474,ENSMUST00000134487	7.12101	203	7.31789	202	8.74593	215	8.43176	290	10.7403	224	9.07435	263	16.5757	296
ENSMUSG00000025878	Uimc1	41.1504	37.2521	46.3483	-1.22617	-0.294155	0.00987551	0.394271	13	55027880	55100300	-1	protein_coding	ubiquitin interaction motif containing 1 [Source:MGI Symbol;Acc:MGI:103185]	ENSMUST00000026997,ENSMUST00000099496,ENSMUST00000124561,ENSMUST00000127195,ENSMUST00000128641,ENSMUST00000133187,ENSMUST00000148702	36.1312	1030	37.1329	1025	39.255	965	36.4892	1255	47.756	996	40.1618	1164	51.127	913
ENSMUSG00000021268	Meg3	750.92	833.889	640.294	1.3167	0.396927	0.00990376	0.39433	12	109541001	109571726	1	lncRNA	maternally expressed 3 [Source:MGI Symbol;Acc:MGI:1202886]	ENSMUST00000124106,ENSMUST00000126289,ENSMUST00000128178,ENSMUST00000128458,ENSMUST00000129245,ENSMUST00000143272,ENSMUST00000143836,ENSMUST00000143847,ENSMUST00000146701,ENSMUST00000150851,ENSMUST00000166636	807.902	23031	871.554	24058	963.476	23685	692.626	23822	519.467	10834	692.859	20081	708.555	12653
ENSMUSG00000102145	Gm38056	2.94715	2.14605	4.01529	-1.71648	-0.77945	0.0100394	0.398654	1	55440904	55445930	1	TEC	predicted gene, 38056 [Source:MGI Symbol;Acc:MGI:5611284]	ENSMUST00000193928	1.75394	50	2.02872	56	2.56276	63	2.23878	77	3.50019	73	3.00178	87	5.5439	99
ENSMUSG00000095562	Gm21887	13.4735	10.7294	17.1323	-1.5237	-0.607581	0.0100967	0.399851	X	170009659	170019281	1	lncRNA	predicted gene, 21887 [Source:MGI Symbol;Acc:MGI:5434051]	ENSMUST00000178789,ENSMUST00000179760,ENSMUST00000180251,ENSMUST00000238482,ENSMUST00000238681	7.9629	227	15.5777	430	6.67132	164	12.7058	437	19.8983	415	18.5627	538	12.9358	231
ENSMUSG00000022533	Atp13a3	124.9	133.496	113.44	1.17748	0.235699	0.0101377	0.400399	16	30312423	30405975	-1	protein_coding	ATPase type 13A3 [Source:MGI Symbol;Acc:MGI:2685387]	ENSMUST00000061350,ENSMUST00000100013,ENSMUST00000136065,ENSMUST00000149882,ENSMUST00000153656,ENSMUST00000229503,ENSMUST00000229616,ENSMUST00000229750	132.282	3771	117.919	3255	149.861	3684	133.92	4606	104.286	2175	122.245	3543	113.79	2032
ENSMUSG00000044646	Zbtb7c	10.4481	12.0493	8.31323	1.37086	0.455084	0.0102376	0.401255	18	75820178	76148564	1	protein_coding	zinc finger and BTB domain containing 7C [Source:MGI Symbol;Acc:MGI:2443302]	ENSMUST00000058997,ENSMUST00000167921,ENSMUST00000236462	13.7158	391	10.687	295	10.129	249	13.6653	470	7.76755	162	8.66031	251	8.51184	152
ENSMUSG00000037370	Enpp1	23.6358	21.4728	26.5197	-1.25014	-0.322095	0.0102484	0.401255	10	24637914	24712159	-1	protein_coding	ectonucleotide pyrophosphatase/phosphodiesterase 1 [Source:MGI Symbol;Acc:MGI:97370]	ENSMUST00000039882,ENSMUST00000105520,ENSMUST00000135846,ENSMUST00000142974,ENSMUST00000150570	22.0997	630	22.0986	610	18.7529	461	22.9402	789	28.2892	590	25.1183	728	26.1515	467
ENSMUSG00000050541	Adra1b	3.46204	2.58366	4.63322	-1.64924	-0.721802	0.0102666	0.401255	11	43774606	43901210	-1	protein_coding	adrenergic receptor, alpha 1b [Source:MGI Symbol;Acc:MGI:104774]	ENSMUST00000067258,ENSMUST00000124306,ENSMUST00000139906,ENSMUST00000167574	1.92934	55	3.26045	90	2.23733	55	2.90751	100	4.84273	101	5.41701	157	3.63993	65
ENSMUSG00000050029	Rap2c	111.573	119.078	101.566	1.17883	0.237355	0.0102683	0.401255	X	51003912	51018018	-1	protein_coding	RAP2C, member of RAS oncogene family [Source:MGI Symbol;Acc:MGI:1919315]	ENSMUST00000053593	116.322	3316	129.404	3572	109.344	2688	121.243	4170	101.506	2117	105.028	3044	98.1662	1753
ENSMUSG00000000214	Th	1.89213	2.32494	1.31506	1.78769	0.8381	0.0103322	0.401723	7	142892752	142931128	-1	protein_coding	tyrosine hydroxylase [Source:MGI Symbol;Acc:MGI:98735]	ENSMUST00000000219,ENSMUST00000105929,ENSMUST00000123057,ENSMUST00000124951,ENSMUST00000138482,ENSMUST00000140344	2.28013	65	2.42722	67	2.23733	55	2.35508	81	1.29459	27	1.13861	33	1.51197	27
ENSMUSG00000039959	Hip1	243.709	264.3	216.254	1.20567	0.269834	0.0103349	0.401723	5	135406531	135545120	-1	protein_coding	huntingtin interacting protein 1 [Source:MGI Symbol;Acc:MGI:1099804]	ENSMUST00000060311,ENSMUST00000200808,ENSMUST00000200898,ENSMUST00000201479,ENSMUST00000201998,ENSMUST00000202044,ENSMUST00000202095,ENSMUST00000202236,ENSMUST00000202643,ENSMUST00000212301	273.931	7809	239.715	6617	278.853	6855	264.699	9104	225.547	4704	212.436	6157	210.78	3764
ENSMUSG00000030554	Synm	24.2951	26.5243	21.3229	1.28638	0.36332	0.0103983	0.403127	7	67730160	67759742	-1	protein_coding	synemin, intermediate filament protein [Source:MGI Symbol;Acc:MGI:2661187]	ENSMUST00000051389,ENSMUST00000074233,ENSMUST00000207102,ENSMUST00000208231,ENSMUST00000208815	23.7484	677	26.3372	727	24.6106	605	31.4011	1080	24.6452	514	20.5639	596	18.7596	335
ENSMUSG00000063543	Gm5616	5.40673	4.68718	6.36612	-1.46833	-0.554176	0.0104632	0.404509	9	48450400	48450783	1	processed_pseudogene	predicted gene 5616 [Source:MGI Symbol;Acc:MGI:3646416]	ENSMUST00000165252	5.68278	162	3.36913	93	4.0272	99	5.66964	195	5.514	115	5.52052	160	8.06385	144
ENSMUSG00000047746	Fbxo40	43.2218	45.8702	39.6907	1.19697	0.25939	0.010496	0.404509	16	36963460	36990467	-1	protein_coding	F-box protein 40 [Source:MGI Symbol;Acc:MGI:2443753]	ENSMUST00000075869,ENSMUST00000114806,ENSMUST00000127808,ENSMUST00000132511	41.1826	1174	47.3127	1306	49.0179	1205	45.9677	1581	41.0913	857	42.1974	1223	35.7833	639
ENSMUSG00000033377	Palmd	22.4492	24.4825	19.7382	1.25575	0.328553	0.0105164	0.404509	3	116918258	116968987	-1	protein_coding	palmdelphin [Source:MGI Symbol;Acc:MGI:2148896]	ENSMUST00000040097,ENSMUST00000119557,ENSMUST00000143611,ENSMUST00000197659	23.6432	674	24.562	678	25.9124	637	23.8125	819	20.5696	429	18.5972	539	20.0476	358
ENSMUSG00000006369	Fbln1	141.261	131.371	154.447	-1.17806	-0.236407	0.0105575	0.405036	15	85205949	85286535	1	protein_coding	fibulin 1 [Source:MGI Symbol;Acc:MGI:95487]	ENSMUST00000057410,ENSMUST00000109432,ENSMUST00000160798	131.581	3751	122.52	3382	129.033	3172	142.351	4896	148.686	3101	155.506	4507	159.149	2842
ENSMUSG00000042102	Dmgdh	1.13646	1.45244	0.715144	2.22894	1.15636	0.0106241	0.405685	13	93674433	93752833	1	protein_coding	dimethylglycine dehydrogenase precursor [Source:MGI Symbol;Acc:MGI:1921379]	ENSMUST00000048001,ENSMUST00000126196	1.333	38	1.26795	35	1.66783	41	1.54098	53	0.623322	13	1.24212	36	0.279995	5
ENSMUSG00000019256	Ahr	9.1793	10.6825	7.17499	1.36964	0.453798	0.0106295	0.405685	12	35497974	35535038	-1	protein_coding	aryl-hydrocarbon receptor [Source:MGI Symbol;Acc:MGI:105043]	ENSMUST00000110811,ENSMUST00000116436,ENSMUST00000173414	12.9792	370	7.93375	219	10.129	249	11.6882	402	6.5209	136	7.55621	219	7.44786	133
ENSMUSG00000029521	Chek2	13.2031	14.4937	11.4822	1.31204	0.391815	0.010689	0.406487	5	110839979	110874145	1	protein_coding	checkpoint kinase 2 [Source:MGI Symbol;Acc:MGI:1355321]	ENSMUST00000066160,ENSMUST00000196650,ENSMUST00000198373,ENSMUST00000199937,ENSMUST00000200172,ENSMUST00000200630	12.8038	365	15.0705	416	14.8071	364	15.2935	526	12.2267	255	11.5241	334	10.6958	191
ENSMUSG00000003420	Fcgrt	23.4271	20.9703	26.7028	-1.28789	-0.365009	0.0107125	0.406487	7	45092990	45103851	-1	protein_coding	Fc receptor, IgG, alpha chain transporter [Source:MGI Symbol;Acc:MGI:103017]	ENSMUST00000003512,ENSMUST00000209830,ENSMUST00000210642,ENSMUST00000211085,ENSMUST00000211535,ENSMUST00000211668	22.5206	642	20.0699	554	20.2987	499	20.9922	722	30.7825	642	20.5984	597	28.7275	513
ENSMUSG00000009734	Pou6f2	0.976256	1.24021	0.624313	2.10153	1.07144	0.0107411	0.406487	13	18121098	18397686	-1	protein_coding	POU domain, class 6, transcription factor 2 [Source:MGI Symbol;Acc:MGI:2443631]	ENSMUST00000139064,ENSMUST00000175703,ENSMUST00000175768,ENSMUST00000176795,ENSMUST00000176898,ENSMUST00000184299,ENSMUST00000222900,ENSMUST00000223058	0.982208	28	1.63022	45	1.30172	32	1.0467	36	0.575374	12	0.793574	23	0.503991	9
ENSMUSG00000114277	Gm48583	0.763288	1.01514	0.427483	2.81156	1.49137	0.0107727	0.406487	13	60641790	60642009	1	processed_pseudogene	predicted gene, 48583 [Source:MGI Symbol;Acc:MGI:6098152]	ENSMUST00000225897	1.36808	39	0.507181	14	1.74919	43	0.436126	15	0.143843	3	1.13861	33	0	0
ENSMUSG00000001493	Meox1	118.586	110.763	129.017	-1.24726	-0.318758	0.010805	0.406487	11	101877510	101894374	-1	protein_coding	mesenchyme homeobox 1 [Source:MGI Symbol;Acc:MGI:103220]	ENSMUST00000057054	132.353	3773	88.2857	2437	117.887	2898	104.525	3595	141.11	2943	110.479	3202	135.461	2419
ENSMUSG00000027070	Lrp2	15.5082	17.9628	12.2354	1.34925	0.432156	0.010887	0.406487	2	69424340	69586065	-1	protein_coding	low density lipoprotein receptor-related protein 2 [Source:MGI Symbol;Acc:MGI:95794]	ENSMUST00000080953,ENSMUST00000092551,ENSMUST00000100051,ENSMUST00000128742	23.0117	656	14.8894	411	14.8477	365	19.1023	657	8.48676	177	14.3878	417	13.8317	247
ENSMUSG00000043336	Filip1l	78.8947	75.9213	82.8592	-1.16135	-0.215803	0.0108921	0.406487	16	57353093	57573126	1	protein_coding	filamin A interacting protein 1-like [Source:MGI Symbol;Acc:MGI:1925999]	ENSMUST00000099667,ENSMUST00000159414,ENSMUST00000159816	89.6967	2557	67.2377	1856	75.8659	1865	70.885	2438	77.3878	1614	88.5353	2566	82.6544	1476
ENSMUSG00000045838	Ccdc9b	8.35995	9.49816	6.84234	1.39071	0.475822	0.0109047	0.406487	2	118754158	118762661	-1	protein_coding	coiled-coil domain containing 9B [Source:MGI Symbol;Acc:MGI:2685199]	ENSMUST00000059997,ENSMUST00000151270	9.61161	274	9.41907	260	10.2104	251	8.75159	301	6.56885	137	8.24627	239	5.71189	102
ENSMUSG00000029217	Tec	7.89939	6.73233	9.45546	-1.46426	-0.55017	0.0109217	0.406487	5	72755716	72868483	-1	protein_coding	tec protein tyrosine kinase [Source:MGI Symbol;Acc:MGI:98662]	ENSMUST00000071944,ENSMUST00000073843,ENSMUST00000113594,ENSMUST00000126481,ENSMUST00000138842,ENSMUST00000149533,ENSMUST00000150193,ENSMUST00000155342,ENSMUST00000202547	8.1383	232	5.54276	153	6.38656	157	6.86171	236	7.09628	148	13.3182	386	7.95185	142
ENSMUSG00000049436	Upk1b	27.289	29.6295	24.1684	1.26429	0.338333	0.0109265	0.406487	16	38773184	38800328	-1	protein_coding	uroplakin 1B [Source:MGI Symbol;Acc:MGI:98912]	ENSMUST00000057767,ENSMUST00000232536	25.8531	737	34.5245	953	23.9191	588	34.2213	1177	22.4396	468	23.1862	672	26.8795	480
ENSMUSG00000039697	Ncoa7	30.1045	32.8036	26.5057	1.22769	0.295942	0.0110034	0.407162	10	30628999	30803326	-1	protein_coding	nuclear receptor coactivator 7 [Source:MGI Symbol;Acc:MGI:2444847]	ENSMUST00000068567,ENSMUST00000092610,ENSMUST00000213836,ENSMUST00000213889,ENSMUST00000213897,ENSMUST00000215725,ENSMUST00000215740,ENSMUST00000215926,ENSMUST00000216172,ENSMUST00000217138,ENSMUST00000217398,ENSMUST00000217644	33.6056	958	31.5539	871	32.2989	794	33.7561	1161	25.4603	531	28.4652	825	25.5915	457
ENSMUSG00000086320	Gm12840	6.5789	5.55427	7.94508	-1.42118	-0.507086	0.0110301	0.407162	4	117700188	117700923	1	lncRNA	predicted gene 12840 [Source:MGI Symbol;Acc:MGI:3650917]	ENSMUST00000156081	5.22675	149	4.31104	119	5.00349	123	7.67581	264	6.66475	139	7.31468	212	9.85581	176
ENSMUSG00000086825	Gm15675	7.32563	6.5683	8.33541	-1.4617	-0.54765	0.0111184	0.407162	1	130429781	130437191	-1	lncRNA	predicted gene 15675 [Source:MGI Symbol;Acc:MGI:3783117]	ENSMUST00000130486	9.22574	263	4.78199	132	6.5086	160	5.75686	198	8.48676	177	6.83164	198	9.68782	173
ENSMUSG00000029211	Gabra4	11.425	12.906	9.45024	1.35915	0.442709	0.0111202	0.407162	5	71569749	71658308	-1	protein_coding	gamma-aminobutyric acid (GABA) A receptor, subunit alpha 4 [Source:MGI Symbol;Acc:MGI:95616]	ENSMUST00000031121,ENSMUST00000197994,ENSMUST00000198138,ENSMUST00000199150,ENSMUST00000199357	13.0844	373	13.875	383	13.1799	324	11.4846	395	8.29497	173	10.1439	294	9.91181	177
ENSMUSG00000045658	Pid1	6.53486	5.89133	7.3929	-1.44002	-0.526092	0.0111368	0.407162	1	84036296	84364180	-1	protein_coding	phosphotyrosine interaction domain containing 1 [Source:MGI Symbol;Acc:MGI:2138391]	ENSMUST00000168574,ENSMUST00000175948,ENSMUST00000175996,ENSMUST00000176559,ENSMUST00000176720,ENSMUST00000176822,ENSMUST00000177458,ENSMUST00000187992	7.99798	228	4.81822	133	4.35263	107	6.39651	220	7.19217	150	7.31468	212	7.67186	137
ENSMUSG00000026113	Inpp4a	40.1352	43.2312	36.0073	1.19859	0.261339	0.0111422	0.407162	1	37299865	37410736	1	protein_coding	inositol polyphosphate-4-phosphatase, type I [Source:MGI Symbol;Acc:MGI:1931123]	ENSMUST00000027287,ENSMUST00000058307,ENSMUST00000114933,ENSMUST00000123124,ENSMUST00000132401,ENSMUST00000132615,ENSMUST00000136846,ENSMUST00000137266,ENSMUST00000140264,ENSMUST00000146676,ENSMUST00000168546,ENSMUST00000193024,ENSMUST00000193774	43.4276	1238	43.7262	1207	45.7636	1125	40.0073	1376	38.0226	793	35.5038	1029	34.4954	616
ENSMUSG00000060913	Trim55	182.92	191.054	172.076	1.19091	0.252064	0.0111609	0.407162	3	19644474	19692421	1	protein_coding	tripartite motif-containing 55 [Source:MGI Symbol;Acc:MGI:3036269]	ENSMUST00000029139,ENSMUST00000195744	150.243	4283	221.022	6101	204.167	5019	188.784	6493	171.557	3578	190.113	5510	154.557	2760
ENSMUSG00000038296	Galnt18	9.20476	10.1946	7.88498	1.37992	0.464583	0.0111657	0.407162	7	111471661	111779977	-1	protein_coding	polypeptide N-acetylgalactosaminyltransferase 18 [Source:MGI Symbol;Acc:MGI:2446239]	ENSMUST00000049430,ENSMUST00000106663	8.17338	233	9.81757	271	11.3901	280	11.3974	392	8.87035	185	7.72872	224	7.05587	126
ENSMUSG00000039115	Itga9	98.4862	92.5066	106.459	-1.22905	-0.297543	0.0112515	0.408308	9	118606690	118901003	1	protein_coding	integrin alpha 9 [Source:MGI Symbol;Acc:MGI:104756]	ENSMUST00000044165,ENSMUST00000124360,ENSMUST00000124422,ENSMUST00000125021,ENSMUST00000149150,ENSMUST00000155437	108.955	3106	71.44	1972	92.8696	2283	96.7618	3328	111.239	2320	114.62	3322	93.5182	1670
ENSMUSG00000034936	Arl4d	16.181	17.4892	14.4367	1.28759	0.364678	0.0112644	0.408308	11	101665541	101667832	1	protein_coding	ADP-ribosylation factor-like 4D [Source:MGI Symbol;Acc:MGI:1933155]	ENSMUST00000039388	14.2069	405	19.128	528	19.7292	485	16.8926	581	15.5351	324	13.6633	396	14.1117	252
ENSMUSG00000033688	1300017J02Rik	2.27858	2.64338	1.79218	1.73303	0.793294	0.0112803	0.408308	9	103250521	103305082	-1	protein_coding	RIKEN cDNA 1300017J02 gene [Source:MGI Symbol;Acc:MGI:1919025]	ENSMUST00000035163,ENSMUST00000123530,ENSMUST00000142540,ENSMUST00000150524,ENSMUST00000151073,ENSMUST00000154357	1.29792	37	1.95627	54	2.72548	67	4.59386	158	1.39049	29	1.24212	36	2.74395	49
ENSMUSG00000041078	Grid1	11.8967	13.7603	9.41178	1.42048	0.506376	0.0116334	0.419525	14	34820108	35583379	1	protein_coding	glutamate receptor, ionotropic, delta 1 [Source:MGI Symbol;Acc:MGI:95812]	ENSMUST00000043349,ENSMUST00000173307,ENSMUST00000227253	14.6279	417	12.2448	338	17.0037	418	11.1648	384	10.7883	225	8.03925	233	9.40782	168
ENSMUSG00000027962	Vcam1	62.1617	57.2155	68.7568	-1.20566	-0.269823	0.0116471	0.419525	3	116109949	116129688	-1	protein_coding	vascular cell adhesion molecule 1 [Source:MGI Symbol;Acc:MGI:98926]	ENSMUST00000029574,ENSMUST00000196309,ENSMUST00000196449,ENSMUST00000197031	58.5466	1669	53.5438	1478	53.5332	1316	63.2382	2175	57.6812	1203	79.1504	2294	69.4387	1240
ENSMUSG00000031974	Abcb10	54.1766	57.4018	49.8764	1.18257	0.241929	0.0117032	0.420516	8	123952459	123983122	-1	protein_coding	ATP-binding cassette, sub-family B (MDR/TAP), member 10 [Source:MGI Symbol;Acc:MGI:1860508]	ENSMUST00000075578	52.5482	1498	53.4713	1476	61.0181	1500	62.5695	2152	48.4752	1011	47.787	1385	53.367	953
ENSMUSG00000040441	Slc26a10	3.89359	2.75782	5.40796	-1.74938	-0.806842	0.0118571	0.425008	10	127171393	127180645	-1	protein_coding	solute carrier family 26, member 10 [Source:MGI Symbol;Acc:MGI:2143920]	ENSMUST00000095270,ENSMUST00000218658,ENSMUST00000220327,ENSMUST00000221174,ENSMUST00000222911,ENSMUST00000238577	2.13981	61	3.04308	84	2.35937	58	3.48901	120	4.4112	92	8.00475	232	3.80793	68
ENSMUSG00000020672	Sntg2	5.72929	4.96452	6.749	-1.48699	-0.57239	0.0119374	0.425683	12	30174482	30373375	-1	protein_coding	syntrophin, gamma 2 [Source:MGI Symbol;Acc:MGI:1919541]	ENSMUST00000021004,ENSMUST00000125530,ENSMUST00000130062,ENSMUST00000133324,ENSMUST00000142046,ENSMUST00000149710,ENSMUST00000156953,ENSMUST00000218489,ENSMUST00000218723	6.1388	175	3.44158	95	5.04417	124	5.23351	180	6.80859	142	5.93455	172	7.50386	134
ENSMUSG00000035671	Zswim4	53.3555	50.3138	57.4111	-1.19751	-0.260033	0.0119855	0.425683	8	84210678	84237055	-1	protein_coding	zinc finger SWIM-type containing 4 [Source:MGI Symbol;Acc:MGI:2443726]	ENSMUST00000039480	57.5995	1642	46.0085	1270	51.4179	1264	46.2293	1590	62.6678	1307	53.7905	1559	55.775	996
ENSMUSG00000030657	Xylt1	26.6003	29.1332	23.223	1.22282	0.290216	0.0119885	0.425683	7	117380979	117673580	1	protein_coding	xylosyltransferase 1 [Source:MGI Symbol;Acc:MGI:2451073]	ENSMUST00000032892,ENSMUST00000160035,ENSMUST00000161889	31.2202	890	24.7794	684	28.4345	699	32.0989	1104	21.6724	452	22.0131	638	25.9835	464
ENSMUSG00000097451	Rian	597.908	664.334	509.34	1.35306	0.43623	0.0119915	0.425683	12	109603808	109661716	1	lncRNA	RNA imprinted and accumulated in nucleus [Source:MGI Symbol;Acc:MGI:1922995]	ENSMUST00000180876,ENSMUST00000181253,ENSMUST00000181527,ENSMUST00000182088,ENSMUST00000182100,ENSMUST00000182119,ENSMUST00000182238,ENSMUST00000182370,ENSMUST00000182406,ENSMUST00000182689,ENSMUST00000182737,ENSMUST00000182770,ENSMUST00000182981,ENSMUST00000183026,ENSMUST00000183180,ENSMUST00000183191,ENSMUST00000183215,ENSMUST00000183266,ENSMUST00000192864,ENSMUST00000194138,ENSMUST00000221135,…	639.733	18237	726.899	20065	666.318	16380	624.387	21475	353.088	7364	558.159	16177	616.772	11014
ENSMUSG00000034730	Adgrb1	0.99273	1.22886	0.677893	2.08776	1.06196	0.0120609	0.427117	15	74516195	74589465	1	protein_coding	adhesion G protein-coupled receptor B1 [Source:MGI Symbol;Acc:MGI:1933736]	ENSMUST00000042035,ENSMUST00000170845,ENSMUST00000185682,ENSMUST00000186095,ENSMUST00000186360,ENSMUST00000187485,ENSMUST00000187599,ENSMUST00000187639,ENSMUST00000189200,ENSMUST00000189353,ENSMUST00000190524,ENSMUST00000230935	0.806814	23	0.90568	25	1.74919	43	1.45375	50	0.335635	7	0.690065	20	1.00798	18
ENSMUSG00000015094	Npdc1	18.4733	16.3984	21.2398	-1.31765	-0.397964	0.0121049	0.427649	2	25399351	25409494	1	protein_coding	neural proliferation, differentiation and control 1 [Source:MGI Symbol;Acc:MGI:1099802]	ENSMUST00000055921,ENSMUST00000071442,ENSMUST00000124277,ENSMUST00000128144,ENSMUST00000131185,ENSMUST00000132287,ENSMUST00000133409,ENSMUST00000136138,ENSMUST00000138651,ENSMUST00000141106,ENSMUST00000141567,ENSMUST00000144413,ENSMUST00000154809,ENSMUST00000156824	17.1536	489	13.7301	379	17.6139	433	17.0961	588	23.3506	487	19.4253	563	20.9436	374
ENSMUSG00000035934	Pknox2	30.4391	28.7895	32.6386	-1.22643	-0.294459	0.0121407	0.427888	9	36890982	37147407	-1	protein_coding	Pbx/knotted 1 homeobox 2 [Source:MGI Symbol;Acc:MGI:2445415]	ENSMUST00000039674,ENSMUST00000080754,ENSMUST00000175938,ENSMUST00000176562,ENSMUST00000176622,ENSMUST00000177080,ENSMUST00000177218,ENSMUST00000177444,ENSMUST00000188057,ENSMUST00000188348,ENSMUST00000188433,ENSMUST00000189294,ENSMUST00000213653,ENSMUST00000215175	35.3595	1008	25.359	700	28.0683	690	26.3711	907	34.6663	723	32.226	934	31.0234	554
ENSMUSG00000044629	Cnrip1	5.18864	4.40398	6.23486	-1.48954	-0.574864	0.0121876	0.428516	11	17051586	17079371	1	protein_coding	cannabinoid receptor interacting protein 1 [Source:MGI Symbol;Acc:MGI:1917505]	ENSMUST00000058159,ENSMUST00000131515,ENSMUST00000135637	5.12152	146	3.80385	105	4.47466	110	4.21588	145	7.19217	150	5.52052	160	5.99189	107
ENSMUSG00000079884	Gm10698	19.9862	17.7381	22.9835	-1.25744	-0.330489	0.012287	0.428966	9	33728247	33728850	1	processed_pseudogene	predicted gene 10698 [Source:MGI Symbol;Acc:MGI:3704329]	ENSMUST00000182663	16.2064	462	18.7295	517	20.4614	503	15.5552	535	25.1247	524	24.8423	720	18.9836	339
ENSMUSG00000090381	Gm6158	15.6391	12.9204	19.2642	-1.37598	-0.460461	0.0123108	0.428966	14	24069734	24070637	1	processed_pseudogene	predicted gene 6158 [Source:MGI Symbol;Acc:MGI:3779562]	ENSMUST00000109467	9.2959	265	17.5702	485	13.7087	337	11.1067	382	18.5079	386	16.9411	491	22.3436	399
ENSMUSG00000022099	Dmtn	14.9521	16.1215	13.393	1.29184	0.369424	0.0123164	0.428966	14	70601263	70636048	-1	protein_coding	dematin actin binding protein [Source:MGI Symbol;Acc:MGI:99670]	ENSMUST00000022694,ENSMUST00000022695,ENSMUST00000110984,ENSMUST00000226543,ENSMUST00000227331,ENSMUST00000227453,ENSMUST00000228001,ENSMUST00000228009,ENSMUST00000228295,ENSMUST00000228824	12.6284	360	15.2516	421	17.3292	426	19.2768	663	12.8021	267	12.1451	352	15.2317	272
ENSMUSG00000027368	Dusp2	4.95654	4.14414	6.03973	-1.48291	-0.568434	0.0123491	0.428966	2	127336159	127338376	1	protein_coding	dual specificity phosphatase 2 [Source:MGI Symbol;Acc:MGI:101911]	ENSMUST00000028846,ENSMUST00000146479	4.41994	126	3.94876	109	4.51534	111	3.69253	127	4.89068	102	6.90065	200	6.32788	113
ENSMUSG00000028195	Ccn1	115.676	109.579	123.804	-1.17177	-0.228684	0.0123879	0.428966	3	145646976	145649981	-1	protein_coding	cellular communication network factor 1 [Source:MGI Symbol;Acc:MGI:88613]	ENSMUST00000029846	119.408	3404	88.7928	2451	111.867	2750	118.248	4067	116.417	2428	128.663	3729	126.334	2256
ENSMUSG00000038264	Sema7a	12.3603	14.2173	9.88442	1.39017	0.475259	0.0123999	0.428966	9	57940112	57962865	1	protein_coding	sema domain, immunoglobulin domain (Ig), and GPI membrane anchor, (semaphorin) 7A [Source:MGI Symbol;Acc:MGI:1306826]	ENSMUST00000043059,ENSMUST00000214314	15.7153	448	12.281	339	16.1088	396	12.7639	439	10.8362	226	8.17726	237	10.6398	190
ENSMUSG00000028626	Col9a2	43.9055	41.6728	46.8825	-1.20873	-0.273489	0.0124042	0.428966	4	121039385	121055322	1	protein_coding	collagen, type IX, alpha 2 [Source:MGI Symbol;Acc:MGI:88466]	ENSMUST00000030372,ENSMUST00000140119,ENSMUST00000151987	50.5136	1440	35.8287	989	40.516	996	39.8328	1370	48.667	1015	42.1974	1223	49.7831	889
ENSMUSG00000020142	Slc1a4	34.3029	32.0883	37.2557	-1.24606	-0.317374	0.01247	0.429972	11	20302180	20332713	-1	protein_coding	solute carrier family 1 (glutamate/neutral amino acid transporter), member 4 [Source:MGI Symbol;Acc:MGI:2135601]	ENSMUST00000004634,ENSMUST00000109594	38.236	1090	25.5402	705	33.8447	832	30.7323	1057	38.9336	812	35.5383	1030	37.2953	666
ENSMUSG00000029103	Lrpap1	116.191	111.126	122.944	-1.16151	-0.216005	0.0124917	0.429972	5	35091501	35105766	-1	protein_coding	low density lipoprotein receptor-related protein associated protein 1 [Source:MGI Symbol;Acc:MGI:96829]	ENSMUST00000030986,ENSMUST00000132754,ENSMUST00000147028,ENSMUST00000152028,ENSMUST00000153664	126.915	3618	101.364	2798	109.141	2683	107.083	3683	124.808	2603	125.419	3635	118.606	2118
ENSMUSG00000010797	Wnt2	5.06116	5.72606	4.17461	1.46159	0.547539	0.0126481	0.434341	6	17988940	18030585	-1	protein_coding	wingless-type MMTV integration site family, member 2 [Source:MGI Symbol;Acc:MGI:98954]	ENSMUST00000010941	4.70057	134	6.77448	187	4.80009	118	6.62911	228	4.93862	103	3.10529	90	4.47992	80
ENSMUSG00000034640	Tiparp	50.6666	54.3541	45.7499	1.17959	0.23829	0.0127369	0.436373	3	65528410	65555518	1	protein_coding	TCDD-inducible poly(ADP-ribose) polymerase [Source:MGI Symbol;Acc:MGI:2159210]	ENSMUST00000047906,ENSMUST00000130705,ENSMUST00000154094	55.5299	1583	52.8555	1459	54.6316	1343	54.3994	1871	45.5025	949	45.2682	1312	46.4791	830
ENSMUSG00000016763	Scube1	35.7836	32.2773	40.4587	-1.31041	-0.390018	0.0128227	0.438293	15	83604999	83725021	-1	protein_coding	signal peptide, CUB domain, EGF-like 1 [Source:MGI Symbol;Acc:MGI:1890616]	ENSMUST00000016907,ENSMUST00000043634,ENSMUST00000076060,ENSMUST00000144773,ENSMUST00000171496,ENSMUST00000229057,ENSMUST00000230060	37.1134	1058	26.3009	726	31.6481	778	34.0469	1171	49.0986	1024	38.6781	1121	33.5994	600
ENSMUSG00000020689	Itgb3	54.5807	59.5636	47.9368	1.20498	0.269004	0.0129861	0.442591	11	104608000	104670476	1	protein_coding	integrin beta 3 [Source:MGI Symbol;Acc:MGI:96612]	ENSMUST00000021028,ENSMUST00000127140	64.931	1851	52.3845	1446	65.4928	1610	55.4461	1907	52.407	1093	49.2361	1427	42.1672	753
ENSMUSG00000007950	Abhd8	32.5552	29.9101	36.0821	-1.23015	-0.298837	0.0130355	0.442591	8	71456705	71463655	-1	protein_coding	abhydrolase domain containing 8 [Source:MGI Symbol;Acc:MGI:1918946]	ENSMUST00000008094,ENSMUST00000212321,ENSMUST00000212503	31.7113	904	26.9893	745	29.248	719	31.6918	1090	39.0775	815	32.8816	953	36.2873	648
ENSMUSG00000056423	Uts2b	2.24431	2.77441	1.53752	1.84034	0.879973	0.0130386	0.442591	16	27353322	27370239	-1	protein_coding	urotensin 2B [Source:MGI Symbol;Acc:MGI:2677064]	ENSMUST00000070531	2.94663	84	2.5359	70	3.37634	83	2.23878	77	2.34944	49	1.31112	38	0.951982	17
ENSMUSG00000023087	Noct	110.794	117.624	101.688	1.16307	0.217942	0.0130743	0.442782	3	51224447	51251644	1	protein_coding	nocturnin [Source:MGI Symbol;Acc:MGI:109382]	ENSMUST00000023849,ENSMUST00000144826,ENSMUST00000167780,ENSMUST00000193018	114.989	3278	105.276	2906	126.226	3103	124.005	4265	96.8546	2020	108.754	3152	99.4541	1776
ENSMUSG00000027861	Casq2	61.3283	64.9047	56.5598	1.18581	0.245876	0.0131141	0.443112	3	102086415	102146514	1	protein_coding	calsequestrin 2 [Source:MGI Symbol;Acc:MGI:1309469]	ENSMUST00000029454,ENSMUST00000159521,ENSMUST00000159833,ENSMUST00000164123,ENSMUST00000165540	59.3535	1692	67.4188	1861	67.6895	1664	65.1572	2241	60.654	1265	48.9946	1420	60.0309	1072
ENSMUSG00000031841	Cdh13	42.823	45.5936	39.1289	1.22167	0.288849	0.0131831	0.444425	8	118283733	119324921	1	protein_coding	cadherin 13 [Source:MGI Symbol;Acc:MGI:99551]	ENSMUST00000117160,ENSMUST00000123567,ENSMUST00000129548,ENSMUST00000142551,ENSMUST00000145849,ENSMUST00000148836,ENSMUST00000151842,ENSMUST00000212476	39.604	1129	44.6681	1233	49.5467	1218	48.5553	1670	44.0161	918	34.2272	992	39.1433	699
ENSMUSG00000069049	Eif2s3y	28.7053	35.2322	20.0029	1.66456	0.735139	0.0132531	0.445764	Y	1010543	1028847	1	protein_coding	eukaryotic translation initiation factor 2, subunit 3, structural gene Y-linked [Source:MGI Symbol;Acc:MGI:1349430]	ENSMUST00000091197,ENSMUST00000134820,ENSMUST00000137006,ENSMUST00000139083,ENSMUST00000148961,ENSMUST00000154556	39.4988	1126	21.4465	592	48.2043	1185	31.779	1093	25.748	537	12.4212	360	21.8396	390
ENSMUSG00000055421	Pcdh9	3.37742	2.84036	4.09349	-1.56789	-0.648825	0.0133209	0.446562	14	93013410	93890679	-1	protein_coding	protocadherin 9 [Source:MGI Symbol;Acc:MGI:1306801]	ENSMUST00000068992,ENSMUST00000192221,ENSMUST00000192817,ENSMUST00000193901,ENSMUST00000194056,ENSMUST00000194129,ENSMUST00000195376,ENSMUST00000195826	3.57805	102	2.17363	60	2.64412	65	2.96566	102	3.11661	65	4.79595	139	4.36792	78
ENSMUSG00000036097	Slf2	92.6296	98.7404	84.4818	1.16387	0.218928	0.0133375	0.446562	19	44931151	44983299	1	protein_coding	SMC5-SMC6 complex localization factor 2 [Source:MGI Symbol;Acc:MGI:1924968]	ENSMUST00000096053,ENSMUST00000236057,ENSMUST00000236356,ENSMUST00000236895,ENSMUST00000237505	100.326	2860	97.8134	2700	95.7578	2354	101.065	3476	78.5865	1639	91.3645	2648	83.4944	1491
ENSMUSG00000056880	Gadl1	7.481	5.98624	9.47401	-1.45072	-0.536767	0.0134909	0.450053	9	115909455	116076176	1	protein_coding	glutamate decarboxylase-like 1 [Source:MGI Symbol;Acc:MGI:1920998]	ENSMUST00000069651,ENSMUST00000119291,ENSMUST00000121770	4.84088	138	5.83258	161	6.46792	159	6.80356	234	9.97314	208	6.52111	189	11.9278	213
ENSMUSG00000042331	Specc1	117.178	111.205	125.141	-1.21103	-0.276236	0.0135095	0.450053	11	61956763	62223013	1	protein_coding	sperm antigen with calponin homology and coiled-coil domains 1 [Source:MGI Symbol;Acc:MGI:2442356]	ENSMUST00000049836,ENSMUST00000092415,ENSMUST00000108709,ENSMUST00000136971,ENSMUST00000200742,ENSMUST00000201015,ENSMUST00000201364,ENSMUST00000201624,ENSMUST00000201671,ENSMUST00000201723,ENSMUST00000201866,ENSMUST00000202178,ENSMUST00000202179,ENSMUST00000202389,ENSMUST00000202744,ENSMUST00000202869,ENSMUST00000202905	133.475	3805	87.3438	2411	112.762	2772	111.241	3826	135.261	2821	118.139	3424	122.022	2179
ENSMUSG00000025582	Nptx1	5.26313	6.04273	4.22367	1.49058	0.575873	0.0135334	0.450053	11	119538719	119547753	-1	protein_coding	neuronal pentraxin 1 [Source:MGI Symbol;Acc:MGI:107811]	ENSMUST00000026670	5.29691	151	5.43408	150	6.75267	166	6.68726	230	4.89068	102	4.14039	120	3.63993	65
ENSMUSG00000082688	Gm12124	1.13931	0.788172	1.6075	-1.93826	-0.954763	0.0136487	0.452867	11	35792781	35793459	1	processed_pseudogene	predicted gene 12124 [Source:MGI Symbol;Acc:MGI:3651540]	ENSMUST00000120504	0.63142	18	0.579635	16	0.894933	22	1.0467	36	1.48638	31	1.65615	48	1.67997	30
ENSMUSG00000007097	Atp1a2	130.651	138.573	120.088	1.18164	0.240787	0.0138354	0.458029	1	172271709	172298064	-1	protein_coding	ATPase, Na+/K+ transporting, alpha 2 polypeptide [Source:MGI Symbol;Acc:MGI:88106]	ENSMUST00000085913,ENSMUST00000097464,ENSMUST00000131751,ENSMUST00000137679,ENSMUST00000191781	130.072	3708	144.076	3977	143.637	3531	136.507	4695	133.055	2775	107.65	3120	119.558	2135
ENSMUSG00000001494	Sost	8.82281	7.80253	10.1832	-1.39955	-0.484965	0.0139468	0.460683	11	101962458	101967015	-1	protein_coding	sclerostin [Source:MGI Symbol;Acc:MGI:1921749]	ENSMUST00000001534	9.19066	262	5.94126	164	9.47815	233	6.60004	227	8.43881	176	10.351	300	11.7598	210
ENSMUSG00000107659	Gm44170	1.34678	0.998699	1.81089	-1.86718	-0.900858	0.0140146	0.461886	6	88503605	88504277	1	lncRNA	predicted gene, 44170 [Source:MGI Symbol;Acc:MGI:5690562]	ENSMUST00000203181	1.12252	32	0.796998	22	1.05765	26	1.01763	35	1.34254	28	1.79417	52	2.29596	41
ENSMUSG00000027452	Acss1	24.8373	26.6216	22.4583	1.22146	0.28861	0.0141762	0.465457	2	150618105	150668500	-1	protein_coding	acyl-CoA synthetase short-chain family member 1 [Source:MGI Symbol;Acc:MGI:1915988]	ENSMUST00000028944,ENSMUST00000141500,ENSMUST00000141785,ENSMUST00000147135,ENSMUST00000154328	24.2395	691	26.4821	731	28.8412	709	26.9235	926	21.0011	438	22.9101	664	23.4636	419
ENSMUSG00000025332	Kdm5c	158.033	147.651	171.877	-1.1857	-0.245745	0.0142506	0.465457	X	152233020	152274535	1	protein_coding	lysine (K)-specific demethylase 5C [Source:MGI Symbol;Acc:MGI:99781]	ENSMUST00000082177,ENSMUST00000112584,ENSMUST00000112588,ENSMUST00000154938,ENSMUST00000155793,ENSMUST00000156114	155.926	4445	149.727	4133	137.047	3369	147.905	5087	162.447	3388	183.73	5325	169.453	3026
ENSMUSG00000027584	Oprl1	28.649	26.8703	31.0207	-1.25443	-0.327037	0.0142765	0.465457	2	181715016	181720985	1	protein_coding	opioid receptor-like 1 [Source:MGI Symbol;Acc:MGI:97440]	ENSMUST00000071585,ENSMUST00000108763,ENSMUST00000108766,ENSMUST00000108767,ENSMUST00000108768,ENSMUST00000126835,ENSMUST00000148334,ENSMUST00000151241,ENSMUST00000183693,ENSMUST00000184127,ENSMUST00000184795,ENSMUST00000238942	33.4302	953	21.9537	606	26.0751	641	26.0222	895	34.1868	713	27.2921	791	31.5834	564
ENSMUSG00000046768	Rhoj	33.182	30.9206	36.1972	-1.2435	-0.314403	0.0142802	0.465457	12	75308322	75401456	1	protein_coding	ras homolog family member J [Source:MGI Symbol;Acc:MGI:1931551]	ENSMUST00000055390,ENSMUST00000118602,ENSMUST00000118966,ENSMUST00000146096,ENSMUST00000172981	35.6401	1016	23.6926	654	34.5769	850	29.7729	1024	36.6801	765	38.8161	1125	33.0954	591
ENSMUSG00000024897	Apba1	9.81235	11.0862	8.11393	1.37051	0.454718	0.0142809	0.465457	19	23758887	23949596	1	protein_coding	amyloid beta (A4) precursor protein binding, family A, member 1 [Source:MGI Symbol;Acc:MGI:1860297]	ENSMUST00000025830,ENSMUST00000237688	10.8043	308	10.8682	300	9.7629	240	12.9093	444	9.01419	188	7.93574	230	7.39186	132
ENSMUSG00000034275	Igsf9b	10.1826	11.6412	8.23777	1.40802	0.493669	0.0144222	0.468114	9	27299204	27357546	1	protein_coding	immunoglobulin superfamily, member 9B [Source:MGI Symbol;Acc:MGI:2685354]	ENSMUST00000115247,ENSMUST00000133213,ENSMUST00000214187,ENSMUST00000214357	11.8216	337	9.92625	274	11.0646	272	13.7525	473	7.38396	154	10.3855	301	6.94387	124
ENSMUSG00000040274	Cdk6	83.2864	88.8331	75.8907	1.1606	0.214877	0.014426	0.468114	5	3341485	3531008	1	protein_coding	cyclin-dependent kinase 6 [Source:MGI Symbol;Acc:MGI:1277162]	ENSMUST00000042410,ENSMUST00000165117,ENSMUST00000197385,ENSMUST00000197607,ENSMUST00000199156,ENSMUST00000199396	91.17	2599	92.5242	2554	86.361	2123	85.2771	2933	75.374	1572	72.3878	2098	79.9105	1427
ENSMUSG00000037336	Mfsd2b	8.01747	8.9413	6.7857	1.36902	0.453145	0.0145225	0.47021	12	4862440	4874359	-1	protein_coding	major facilitator superfamily domain containing 2B [Source:MGI Symbol;Acc:MGI:3583946]	ENSMUST00000045921,ENSMUST00000085790,ENSMUST00000125344,ENSMUST00000137337,ENSMUST00000143446,ENSMUST00000147241,ENSMUST00000150764,ENSMUST00000153676	8.03306	229	8.36848	231	9.47815	233	9.88552	340	5.84963	122	6.55561	190	7.95185	142
ENSMUSG00000062093	Gm10110	6.44384	5.52562	7.66813	-1.4158	-0.501621	0.0146697	0.473935	14	89896228	89899447	-1	transcribed_processed_pseudogene	predicted gene 10110 [Source:MGI Symbol;Acc:MGI:3641718]	ENSMUST00000081204,ENSMUST00000228705	5.6477	161	6.95562	192	3.94584	97	5.55333	191	8.29497	173	6.14157	178	8.56784	153
ENSMUSG00000002107	Celf2	79.4077	84.1426	73.0946	1.16501	0.220345	0.0148204	0.477756	2	6539694	7509563	-1	protein_coding	CUGBP, Elav-like family member 2 [Source:MGI Symbol;Acc:MGI:1338822]	ENSMUST00000002176,ENSMUST00000100429,ENSMUST00000114923,ENSMUST00000114924,ENSMUST00000114927,ENSMUST00000114934,ENSMUST00000123142,ENSMUST00000126742,ENSMUST00000137733,ENSMUST00000138347,ENSMUST00000142941,ENSMUST00000148321,ENSMUST00000150624,ENSMUST00000170438,ENSMUST00000182037,ENSMUST00000182355,ENSMUST00000182404,ENSMUST00000182523,ENSMUST00000182560,ENSMUST00000182657,ENSMUST00000182706,…	80.8217	2304	91.6186	2529	78.7948	1937	85.3353	2935	70.6271	1473	71.0421	2059	77.6145	1386
ENSMUSG00000029304	Spp1	1.7192	1.28602	2.29679	-1.8413	-0.880724	0.0148684	0.478257	5	104435118	104441050	1	protein_coding	secreted phosphoprotein 1 [Source:MGI Symbol;Acc:MGI:98389]	ENSMUST00000031243,ENSMUST00000086833,ENSMUST00000112746,ENSMUST00000112747,ENSMUST00000112748,ENSMUST00000132457,ENSMUST00000145084	1.43823	41	1.48531	41	1.26104	31	0.959477	33	1.72612	36	3.03628	88	2.12796	38
ENSMUSG00000032035	Ets1	114.937	109.516	122.166	-1.16878	-0.225007	0.015053	0.479779	9	32636221	32757820	1	protein_coding	E26 avian leukemia oncogene 1, 5' domain [Source:MGI Symbol;Acc:MGI:95455]	ENSMUST00000034534,ENSMUST00000050797,ENSMUST00000183879,ENSMUST00000184110,ENSMUST00000184364,ENSMUST00000184887,ENSMUST00000238819	124.74	3556	95.7847	2644	109.67	2696	107.868	3710	122.075	2546	133.32	3864	111.102	1984
ENSMUSG00000017491	Rarb	36.1488	33.8088	39.2688	-1.20196	-0.265393	0.0150861	0.479779	14	16430839	16819156	-1	protein_coding	retinoic acid receptor, beta [Source:MGI Symbol;Acc:MGI:97857]	ENSMUST00000063750,ENSMUST00000223576,ENSMUST00000223976,ENSMUST00000225245,ENSMUST00000225356,ENSMUST00000225594,ENSMUST00000225921	37.3239	1064	31.5539	871	32.1362	790	34.2213	1177	37.5911	784	37.712	1093	42.5032	759
ENSMUSG00000072675	Duxbl2	2.46317	2.03517	3.03384	-2.02	-1.01435	0.0150998	0.479779	14	26118349	26129763	1	protein_coding	double homeobox B-like 2 [Source:MGI Symbol;Acc:MGI:3710620]	ENSMUST00000100810,ENSMUST00000172038,ENSMUST00000172861,ENSMUST00000173617,ENSMUST00000174012,ENSMUST00000174564	4.13931	118	1.30418	36	1.50511	37	1.19208	41	4.60299	96	1.13861	33	3.35994	60
ENSMUSG00000021469	Msx2	17.6305	18.839	16.0192	1.25724	0.330265	0.0151038	0.479779	13	53466884	53473074	-1	protein_coding	msh homeobox 2 [Source:MGI Symbol;Acc:MGI:97169]	ENSMUST00000021922,ENSMUST00000188606	15.0488	429	20.5046	566	19.9733	491	19.8292	682	17.5489	366	15.837	459	14.6717	262
ENSMUSG00000029815	Malsu1	13.6074	12.1132	15.5997	-1.29081	-0.368282	0.0151131	0.479779	6	49073795	49086751	1	protein_coding	mitochondrial assembly of ribosomal large subunit 1 [Source:MGI Symbol;Acc:MGI:1922843]	ENSMUST00000031839,ENSMUST00000114500,ENSMUST00000128616,ENSMUST00000139726,ENSMUST00000205243	12.2425	349	12.1723	336	10.9833	270	13.0547	449	14.2884	298	14.8709	431	17.6397	315
ENSMUSG00000021281	Tnfaip2	22.1524	24.0739	19.5904	1.25959	0.332949	0.0151396	0.479779	12	111442469	111455018	1	protein_coding	tumor necrosis factor, alpha-induced protein 2 [Source:MGI Symbol;Acc:MGI:104960]	ENSMUST00000102745,ENSMUST00000109792,ENSMUST00000127028,ENSMUST00000127207,ENSMUST00000129467,ENSMUST00000133865,ENSMUST00000156003,ENSMUST00000172783,ENSMUST00000173581,ENSMUST00000174298,ENSMUST00000174692	22.5206	642	23.4752	648	26.8073	659	23.4926	808	22.3916	467	18.9078	548	17.4717	312
ENSMUSG00000035095	Fam167a	10.6784	12.0583	8.83855	1.36001	0.443621	0.01516	0.479779	14	63436394	63465498	1	protein_coding	family with sequence similarity 167, member A [Source:MGI Symbol;Acc:MGI:3606565]	ENSMUST00000121288,ENSMUST00000128313	12.3478	352	11.1217	307	13.0172	320	11.7463	404	10.0211	209	7.59071	220	8.90383	159
ENSMUSG00000037736	Limch1	83.9606	90.5692	75.1491	1.19051	0.251576	0.0152173	0.479779	5	66745827	67057158	1	protein_coding	LIM and calponin homology domains 1 [Source:MGI Symbol;Acc:MGI:1924819]	ENSMUST00000038188,ENSMUST00000101164,ENSMUST00000117601,ENSMUST00000118242,ENSMUST00000119854,ENSMUST00000122812,ENSMUST00000127184,ENSMUST00000130228,ENSMUST00000132991,ENSMUST00000135334,ENSMUST00000137394,ENSMUST00000140428,ENSMUST00000147050,ENSMUST00000153174,ENSMUST00000201322,ENSMUST00000201852,ENSMUST00000202048,ENSMUST00000202830,ENSMUST00000238785,ENSMUST00000238993	94.2219	2686	81.4749	2249	90.8357	2233	95.7441	3293	83.9087	1750	69.524	2015	72.0146	1286
ENSMUSG00000019889	Ptprk	90.4924	86.8073	95.4059	-1.16197	-0.216569	0.0152254	0.479779	10	28074820	28597397	1	protein_coding	protein tyrosine phosphatase, receptor type, K [Source:MGI Symbol;Acc:MGI:103310]	ENSMUST00000166468,ENSMUST00000218276,ENSMUST00000218359,ENSMUST00000218584,ENSMUST00000218633,ENSMUST00000219107,ENSMUST00000219478,ENSMUST00000219621,ENSMUST00000219761,ENSMUST00000220357,ENSMUST00000220404	100.291	2859	73.7586	2036	84.5305	2078	88.6498	3049	93.9298	1959	98.7137	2861	93.5742	1671
ENSMUSG00000054162	Spock3	9.06917	10.4869	7.17886	1.34207	0.424458	0.0152414	0.479779	8	62951009	63357103	1	protein_coding	sparc/osteonectin, cwcv and kazal-like domains proteoglycan 3 [Source:MGI Symbol;Acc:MGI:1920152]	ENSMUST00000093480,ENSMUST00000117377,ENSMUST00000118003,ENSMUST00000119068,ENSMUST00000138398,ENSMUST00000141513	13.1195	374	8.62207	238	10.6985	263	9.50754	327	5.99348	125	8.03925	233	7.50386	134
ENSMUSG00000039323	Igfbp2	50.8451	54.942	45.3826	1.20893	0.273732	0.0153664	0.482682	1	72824503	72852474	1	protein_coding	insulin-like growth factor binding protein 2 [Source:MGI Symbol;Acc:MGI:96437]	ENSMUST00000047328,ENSMUST00000120564,ENSMUST00000155703	55.6	1585	58.9054	1626	55.2824	1359	49.98	1719	39.7487	829	51.8238	1502	44.5752	796
ENSMUSG00000021057	Akap5	45.284	48.2117	41.3802	1.18232	0.241615	0.0155195	0.486354	12	76324891	76334153	1	protein_coding	A kinase (PRKA) anchor protein 5 [Source:MGI Symbol;Acc:MGI:2685104]	ENSMUST00000095610,ENSMUST00000154078,ENSMUST00000172992	46.1287	1315	49.7037	1372	49.7094	1222	47.3051	1627	41.5708	867	39.9547	1158	42.6152	761
ENSMUSG00000071847	Apcdd1	46.355	49.7404	41.841	1.20611	0.270359	0.0155493	0.486354	18	62922231	62961179	1	protein_coding	adenomatosis polyposis coli down-regulated 1 [Source:MGI Symbol;Acc:MGI:3513977]	ENSMUST00000096554,ENSMUST00000163716,ENSMUST00000236135,ENSMUST00000236605,ENSMUST00000237428	47.602	1357	47.4214	1309	43.6076	1072	60.3307	2075	47.2765	986	33.9512	984	44.2952	791
ENSMUSG00000053644	Aldh7a1	90.6896	84.7983	98.5447	-1.17246	-0.22954	0.015614	0.487344	18	56509687	56572951	-1	protein_coding	aldehyde dehydrogenase family 7, member A1 [Source:MGI Symbol;Acc:MGI:108186]	ENSMUST00000066208,ENSMUST00000168517,ENSMUST00000170309,ENSMUST00000171844,ENSMUST00000171851,ENSMUST00000172734,ENSMUST00000172902,ENSMUST00000174518,ENSMUST00000174704	87.2762	2488	79.736	2201	83.2694	2047	88.9115	3058	105.965	2210	99.2313	2876	90.4383	1615
ENSMUSG00000045930	Clec14a	26.123	28.6381	22.7695	1.22221	0.289498	0.0156525	0.487419	12	58264720	58269290	-1	protein_coding	C-type lectin domain family 14, member a [Source:MGI Symbol;Acc:MGI:1914114]	ENSMUST00000062254	31.4307	896	24.3809	673	30.7125	755	28.0283	964	20.0422	418	27.6026	800	20.6636	369
ENSMUSG00000022883	Robo1	127.019	121.161	134.829	-1.20332	-0.267019	0.0156826	0.487419	16	72308306	73046095	1	protein_coding	roundabout guidance receptor 1 [Source:MGI Symbol;Acc:MGI:1274781]	ENSMUST00000023600,ENSMUST00000231265,ENSMUST00000231474,ENSMUST00000231566,ENSMUST00000231580,ENSMUST00000232205,ENSMUST00000232264,ENSMUST00000232432,ENSMUST00000232545	147.121	4194	98.4655	2718	110.606	2719	128.454	4418	144.994	3024	127.11	3684	132.382	2364
ENSMUSG00000115037	Gm49262	1.16433	0.763146	1.69923	-1.95303	-0.965711	0.0158839	0.491697	15	36629160	36629991	1	lncRNA	predicted gene, 49262 [Source:MGI Symbol;Acc:MGI:6118737]	ENSMUST00000228278	0.491104	14	0.724544	20	0.935611	23	0.901327	31	2.2056	46	1.38013	40	1.51197	27
ENSMUSG00000096780	Tmem181b-ps	5.0484	4.24541	6.11905	-1.72383	-0.785621	0.015887	0.491697	17	6438524	6467022	-1	transcribed_unprocessed_pseudogene	transmembrane protein 181B, pseudogene [Source:MGI Symbol;Acc:MGI:3779544]	ENSMUST00000167717,ENSMUST00000180035,ENSMUST00000188746,ENSMUST00000190059	6.17388	176	2.06495	57	4.55602	112	4.18681	144	8.05523	168	5.48601	159	4.81591	86
ENSMUSG00000052221	Ppp1r36	3.95124	3.44563	4.62539	-1.54517	-0.627767	0.0159856	0.493709	12	76417538	76439492	1	protein_coding	protein phosphatase 1, regulatory subunit 36 [Source:MGI Symbol;Acc:MGI:2684916]	ENSMUST00000063977,ENSMUST00000218732,ENSMUST00000219251,ENSMUST00000220187	4.80581	137	2.5359	70	3.41702	84	3.02381	104	5.17836	108	4.10588	119	4.59191	82
ENSMUSG00000063412	Gm10131	82.06	86.0232	76.7756	1.15303	0.205431	0.0160229	0.493828	8	34111002	34111737	-1	protein_coding	predicted pseudogene 10131 [Source:MGI Symbol;Acc:MGI:3704308]	ENSMUST00000080152	78.3311	2233	102.269	2823	84.8152	2085	78.6771	2706	88.0801	1837	70.9041	2055	71.3427	1274
ENSMUSG00000105852	Gm42890	1.13976	0.902519	1.45607	-1.93919	-0.955454	0.0160848	0.494699	3	105959503	105984600	1	lncRNA	predicted gene 42890 [Source:MGI Symbol;Acc:MGI:5663027]	ENSMUST00000137168,ENSMUST00000167642	1.29792	37	1.05059	29	0.447466	11	0.814101	28	1.72612	36	1.24212	36	1.39997	25
ENSMUSG00000057541	Pus7	30.1766	32.1596	27.5325	1.22186	0.28908	0.016177	0.49601	5	23740648	23783711	-1	protein_coding	pseudouridylate synthase 7 [Source:MGI Symbol;Acc:MGI:1925947]	ENSMUST00000119946,ENSMUST00000129848,ENSMUST00000131404,ENSMUST00000131992,ENSMUST00000147922,ENSMUST00000148618,ENSMUST00000148921,ENSMUST00000151449,ENSMUST00000195909	27.5018	784	34.7781	960	30.7125	755	35.646	1226	26.2275	547	28.7067	832	27.6635	494
ENSMUSG00000029420	Rimbp2	3.53607	4.03549	2.87018	1.5288	0.6124	0.0161995	0.49601	5	128757791	128953486	-1	protein_coding	RIMS binding protein 2 [Source:MGI Symbol;Acc:MGI:2443235]	ENSMUST00000111346,ENSMUST00000196085,ENSMUST00000196569,ENSMUST00000198941,ENSMUST00000199537,ENSMUST00000199737,ENSMUST00000200470,ENSMUST00000238334,ENSMUST00000239036	3.01678	86	4.81822	133	4.14923	102	4.15773	143	3.35635	70	2.62225	76	2.63195	47
ENSMUSG00000048355	Arxes1	15.5358	16.9544	13.6442	1.28174	0.358109	0.0162284	0.49601	X	136033367	136034946	1	protein_coding	adipocyte-related X-chromosome expressed sequence 1 [Source:MGI Symbol;Acc:MGI:1923469]	ENSMUST00000057625	15.6452	446	18.2585	504	16.7596	412	17.1543	590	15.9666	333	13.3182	386	11.6478	208
ENSMUSG00000027712	Anxa5	334.694	313.219	363.327	-1.20837	-0.273056	0.0162953	0.497024	3	36448923	36475894	-1	protein_coding	annexin A5 [Source:MGI Symbol;Acc:MGI:106008]	ENSMUST00000029266,ENSMUST00000196097,ENSMUST00000199478	350.648	9996	279.638	7719	322.623	7931	299.967	10317	389.001	8113	342.307	9921	358.673	6405
ENSMUSG00000070572	Trmt112-ps2	1.83066	2.29832	1.20711	2.14577	1.10149	0.0163766	0.498069	4	149457329	149457706	1	processed_pseudogene	tRNA methyltransferase 11-2, pseudogene 2 [Source:MGI Symbol;Acc:MGI:3651720]	ENSMUST00000117987	2.03457	58	3.00686	83	0.0813575	2	4.07051	140	2.44534	51	0	0	1.17598	21
ENSMUSG00000024172	St6gal2	2.6096	3.11551	1.93505	1.69821	0.764012	0.0163972	0.498069	17	55445382	55514581	1	protein_coding	beta galactoside alpha 2,6 sialyltransferase 2 [Source:MGI Symbol;Acc:MGI:2445190]	ENSMUST00000025000,ENSMUST00000086878,ENSMUST00000133899,ENSMUST00000153220	2.66599	76	3.29667	91	2.80683	69	3.69253	127	1.43843	30	2.51874	73	1.84797	33
ENSMUSG00000053062	Jam2	29.3514	32.967	24.5306	1.28984	0.367194	0.0164667	0.49915	16	84774123	84825928	1	protein_coding	junction adhesion molecule 2 [Source:MGI Symbol;Acc:MGI:1933820]	ENSMUST00000098407,ENSMUST00000114195,ENSMUST00000138054,ENSMUST00000231910	36.9731	1054	27.8949	770	37.1397	913	29.8601	1027	28.2413	589	21.047	610	24.3035	434
ENSMUSG00000029061	Mmp23	57.5709	53.8744	62.4996	-1.17694	-0.235037	0.0165498	0.500639	4	155650655	155653384	-1	protein_coding	matrix metallopeptidase 23 [Source:MGI Symbol;Acc:MGI:1347361]	ENSMUST00000030937,ENSMUST00000130944,ENSMUST00000139242,ENSMUST00000156906	56.5471	1612	50.9717	1407	54.1027	1330	53.8761	1853	68.4215	1427	57.7584	1674	61.3188	1095
ENSMUSG00000069171	Nr2f1	23.7911	26.3913	20.3241	1.24289	0.313693	0.0166102	0.50122	13	78188973	78199757	-1	protein_coding	nuclear receptor subfamily 2, group F, member 1 [Source:MGI Symbol;Acc:MGI:1352451]	ENSMUST00000091458,ENSMUST00000125176,ENSMUST00000127137,ENSMUST00000135284,ENSMUST00000150498,ENSMUST00000224798	30.2029	861	20.8306	575	29.4107	723	25.1208	864	15.4871	323	21.9095	635	23.5756	421
ENSMUSG00000035112	Wnk4	32.9387	35.7787	29.152	1.2712	0.346188	0.016637	0.50122	11	101260567	101277409	1	protein_coding	WNK lysine deficient protein kinase 4 [Source:MGI Symbol;Acc:MGI:1917097]	ENSMUST00000103108,ENSMUST00000139487,ENSMUST00000147741,ENSMUST00000170056,ENSMUST00000170372	33.5354	956	34.7419	959	38.7262	952	36.1112	1242	36.5362	762	24.1523	700	26.7675	478
ENSMUSG00000073226	Gm10482	1.65827	1.24785	2.2055	-1.76867	-0.822669	0.0168751	0.506941	5	10187866	10237890	1	lncRNA	predicted gene 10482 [Source:MGI Symbol;Acc:MGI:3644444]	ENSMUST00000101606,ENSMUST00000189825,ENSMUST00000190891	1.19268	34	1.63022	45	0.772896	19	1.3956	48	2.39739	50	1.58715	46	2.63195	47
ENSMUSG00000019789	Hey2	91.8102	97.0692	84.7981	1.16231	0.216994	0.0168957	0.506941	10	30832359	30842801	-1	protein_coding	hairy/enhancer-of-split related with YRPW motif 2 [Source:MGI Symbol;Acc:MGI:1341884]	ENSMUST00000019924,ENSMUST00000217504	93.3449	2661	99.4436	2745	99.7443	2452	95.7441	3293	75.4699	1574	90.502	2623	88.4223	1579
ENSMUSG00000025328	Padi3	3.74518	3.01756	4.71535	-1.56423	-0.64545	0.0171122	0.511702	4	140785365	140810648	-1	protein_coding	peptidyl arginine deiminase, type III [Source:MGI Symbol;Acc:MGI:1338891]	ENSMUST00000026377,ENSMUST00000172098	3.19218	91	3.00686	83	3.05091	75	2.82028	97	4.74683	99	3.51933	102	5.87989	105
ENSMUSG00000058396	Gpr182	19.2739	15.0056	24.965	-1.4614	-0.547351	0.0171239	0.511702	10	127747276	127751732	-1	protein_coding	G protein-coupled receptor 182 [Source:MGI Symbol;Acc:MGI:109545]	ENSMUST00000079692	11.3656	324	18.4396	509	13.9935	344	16.2239	558	19.0353	397	37.436	1085	18.4237	329
ENSMUSG00000016349	Eef1a2	106.374	96.0426	120.15	-1.16344	-0.218395	0.0172096	0.513222	2	181147653	181157014	-1	protein_coding	eukaryotic translation elongation factor 1 alpha 2 [Source:MGI Symbol;Acc:MGI:1096317]	ENSMUST00000055990	74.1918	2115	102.632	2833	96.9782	2384	110.369	3796	113.924	2376	127.248	3688	119.278	2130
ENSMUSG00000061082	Plac1	6.83232	5.91615	8.05388	-1.40912	-0.494792	0.0173972	0.517768	X	53069995	53240111	-1	protein_coding	placental specific protein 1 [Source:MGI Symbol;Acc:MGI:1926287]	ENSMUST00000074861,ENSMUST00000114843,ENSMUST00000174390	6.62991	189	5.21672	144	6.06113	149	5.75686	198	8.10318	169	6.76263	196	9.29583	166
ENSMUSG00000108231	Gm4045	1.11229	0.693102	1.67121	-2.65211	-1.40714	0.0174623	0.518365	6	66746017	66746326	1	processed_pseudogene	predicted gene 4045 [Source:MGI Symbol;Acc:MGI:3782220]	ENSMUST00000204076	0.94713	27	0.615862	17	0.162715	4	1.0467	36	0.479478	10	2.07019	60	2.46395	44
ENSMUSG00000020524	Gria1	20.5921	23.1696	17.1553	1.25808	0.331223	0.0174876	0.518365	11	57011387	57330244	1	protein_coding	glutamate receptor, ionotropic, AMPA1 (alpha 1) [Source:MGI Symbol;Acc:MGI:95808]	ENSMUST00000036315,ENSMUST00000094179,ENSMUST00000125292,ENSMUST00000151045,ENSMUST00000173531	27.8175	793	19.1642	529	23.3089	573	22.3878	770	17.7886	371	17.9417	520	15.7357	281
ENSMUSG00000030217	Art4	65.8522	63.6901	68.7349	-1.18109	-0.240119	0.0175602	0.518543	6	136848451	136857733	-1	protein_coding	ADP-ribosyltransferase 4 [Source:MGI Symbol;Acc:MGI:1202710]	ENSMUST00000032341	79.7694	2274	52.1672	1440	64.1504	1577	58.6735	2018	71.7779	1497	66.1082	1916	68.3187	1220
ENSMUSG00000059534	Uqcr10	91.7571	84.5062	101.425	-1.14627	-0.19695	0.017564	0.518543	11	4701973	4704342	-1	protein_coding	ubiquinol-cytochrome c reductase, complex III subunit X [Source:MGI Symbol;Acc:MGI:1913402]	ENSMUST00000058407,ENSMUST00000130236,ENSMUST00000151559	72.5431	2068	91.365	2522	92.9103	2284	81.2066	2793	102.848	2145	107.685	3121	93.7422	1674
ENSMUSG00000029455	Aldh2	72.3785	68.4492	77.6175	-1.17343	-0.230728	0.0176083	0.518811	5	121566027	121593824	-1	protein_coding	aldehyde dehydrogenase 2, mitochondrial [Source:MGI Symbol;Acc:MGI:99600]	ENSMUST00000031411,ENSMUST00000129753,ENSMUST00000133033,ENSMUST00000152945,ENSMUST00000196694,ENSMUST00000199369,ENSMUST00000200541	75.6301	2156	61.7674	1705	68.0149	1672	68.3845	2352	83.7648	1747	71.2492	2065	77.8385	1390
ENSMUSG00000014599	Csf1	31.4273	33.712	28.3809	1.20364	0.267399	0.0177503	0.521951	3	107741048	107760469	-1	protein_coding	colony stimulating factor 1 (macrophage) [Source:MGI Symbol;Acc:MGI:1339753]	ENSMUST00000014743,ENSMUST00000118593,ENSMUST00000120243,ENSMUST00000120654,ENSMUST00000153114,ENSMUST00000155557,ENSMUST00000156820	32.1673	917	36.5895	1010	30.1836	742	35.9077	1235	29.0084	605	26.1189	757	30.0154	536
ENSMUSG00000044461	Shisa2	71.5831	66.453	78.4231	-1.20447	-0.268395	0.0178124	0.522733	14	59625308	59631660	1	protein_coding	shisa family member 2 [Source:MGI Symbol;Acc:MGI:2444716]	ENSMUST00000053949,ENSMUST00000224155	71.4206	2036	58.9054	1626	68.5844	1686	66.9017	2301	87.6007	1827	66.2462	1920	81.4225	1454
ENSMUSG00000075254	Heg1	176.929	189.509	160.155	1.18099	0.24	0.0179648	0.526158	16	33684370	33771576	1	protein_coding	heart development protein with EGF-like domains 1 [Source:MGI Symbol;Acc:MGI:1924696]	ENSMUST00000126532,ENSMUST00000128105,ENSMUST00000132797,ENSMUST00000146518,ENSMUST00000152782,ENSMUST00000152832,ENSMUST00000154863,ENSMUST00000232568	190.548	5432	174.869	4827	194.241	4775	198.379	6823	163.454	3409	168.893	4895	148.117	2645
ENSMUSG00000027966	Col11a1	66.4094	65.1042	68.1495	-1.16349	-0.218457	0.0180066	0.526335	3	114030540	114220718	1	protein_coding	collagen, type XI, alpha 1 [Source:MGI Symbol;Acc:MGI:88446]	ENSMUST00000092155,ENSMUST00000123619,ENSMUST00000138680,ENSMUST00000184978,ENSMUST00000196345,ENSMUST00000196654,ENSMUST00000211802	85.1364	2427	53.4351	1475	57.5604	1415	64.2849	2211	57.873	1207	74.1129	2148	72.4626	1294
ENSMUSG00000044864	Ankrd50	92.2455	87.5231	98.542	-1.1524	-0.204642	0.018117	0.528515	3	38449259	38484844	-1	protein_coding	ankyrin repeat domain 50 [Source:MGI Symbol;Acc:MGI:2139777]	ENSMUST00000094300,ENSMUST00000120875,ENSMUST00000127837,ENSMUST00000156038	93.1695	2656	80.9678	2235	82.944	2039	93.0111	3199	95.1285	1984	101.716	2948	98.7821	1764
ENSMUSG00000006342	Susd2	6.83785	7.90411	5.41618	1.38745	0.472431	0.0182302	0.530764	10	75636706	75644008	-1	protein_coding	sushi domain containing 2 [Source:MGI Symbol;Acc:MGI:1918983]	ENSMUST00000077610,ENSMUST00000095541,ENSMUST00000218896,ENSMUST00000219733	9.08543	259	7.78885	215	7.24082	178	7.50136	258	4.93862	103	5.48601	159	5.82389	104
ENSMUSG00000044288	Cnr1	2.75697	3.21401	2.14758	1.58583	0.665234	0.0183202	0.532333	4	33924593	33948831	1	protein_coding	cannabinoid receptor 1 (brain) [Source:MGI Symbol;Acc:MGI:104615]	ENSMUST00000057188,ENSMUST00000084736,ENSMUST00000133462	2.52568	72	4.05745	112	2.31869	57	3.95421	136	2.63713	55	1.62165	47	2.18396	39
ENSMUSG00000034161	Scx	16.0056	14.4781	18.0421	-1.30247	-0.381255	0.0184636	0.535444	15	76457452	76459458	1	protein_coding	scleraxis [Source:MGI Symbol;Acc:MGI:102934]	ENSMUST00000043089,ENSMUST00000229271	16.9431	483	13.549	374	13.8715	341	13.549	466	18.7955	392	13.9393	404	21.3916	382
ENSMUSG00000114096	Gm48641	1.16901	1.4091	0.848903	1.94316	0.958402	0.0185479	0.536832	12	19816968	19817367	-1	processed_pseudogene	predicted gene, 48641 [Source:MGI Symbol;Acc:MGI:6098248]	ENSMUST00000223436	0.912051	26	1.05059	29	2.07462	51	1.59913	55	0.335635	7	1.0351	30	1.17598	21
ENSMUSG00000020601	Trib2	95.7685	90.0488	103.395	-1.15096	-0.202841	0.0188353	0.544081	12	15791727	15816922	-1	protein_coding	tribbles pseudokinase 2 [Source:MGI Symbol;Acc:MGI:2145021]	ENSMUST00000020922,ENSMUST00000151100,ENSMUST00000221215,ENSMUST00000221518	91.2051	2600	83.5037	2305	90.8763	2234	94.6102	3254	92.5872	1931	113.999	3304	103.598	1850
ENSMUSG00000100454	Gm28901	2.23682	1.62033	3.05882	-1.66588	-0.736287	0.0189154	0.544678	1	97024516	97025565	-1	lncRNA	predicted gene 28901 [Source:MGI Symbol;Acc:MGI:5579607]	ENSMUST00000188810	1.01729	29	1.23172	34	1.58647	39	2.64583	91	2.44534	51	2.1392	62	4.59191	82
ENSMUSG00000068762	Gstm6	2.47713	1.98081	3.13888	-1.60924	-0.686375	0.0189604	0.544678	3	107938847	107943749	-1	protein_coding	glutathione S-transferase, mu 6 [Source:MGI Symbol;Acc:MGI:1309467]	ENSMUST00000106680,ENSMUST00000106681,ENSMUST00000106683,ENSMUST00000106684,ENSMUST00000106685,ENSMUST00000155926	2.03457	58	2.49968	69	1.78987	44	1.59913	55	3.73993	78	2.93277	85	2.74395	49
ENSMUSG00000034218	Atm	22.7954	25.124	19.6905	1.2338	0.303114	0.0190248	0.544678	9	53439149	53536740	-1	protein_coding	ataxia telangiectasia mutated [Source:MGI Symbol;Acc:MGI:107202]	ENSMUST00000118282,ENSMUST00000126598,ENSMUST00000132249,ENSMUST00000132403,ENSMUST00000150244,ENSMUST00000232179	27.4317	782	22.2797	615	23.7157	583	27.0689	931	18.412	384	21.116	612	19.5436	349
ENSMUSG00000079363	Gbp4	2.51181	1.68793	3.61032	-1.84507	-0.883673	0.0190571	0.544678	5	105115767	105139586	-1	protein_coding	guanylate binding protein 4 [Source:MGI Symbol;Acc:MGI:97072]	ENSMUST00000100962,ENSMUST00000196204,ENSMUST00000196677,ENSMUST00000197799,ENSMUST00000198278,ENSMUST00000199629	1.57855	45	1.70268	47	1.66783	41	1.80265	62	2.39739	50	6.4176	186	2.01596	36
ENSMUSG00000022053	Ebf2	1.63815	2.11963	0.99617	1.96328	0.973263	0.0190744	0.544678	14	67233292	67430918	1	protein_coding	early B cell factor 2 [Source:MGI Symbol;Acc:MGI:894332]	ENSMUST00000022637,ENSMUST00000176029,ENSMUST00000176161,ENSMUST00000177231	2.38536	68	1.88381	52	1.09833	27	3.11103	107	0.527426	11	1.17311	34	1.28798	23
ENSMUSG00000041797	Abca9	4.06659	3.33173	5.04641	-1.55887	-0.640497	0.0190778	0.544678	11	110100749	110168196	-1	protein_coding	ATP-binding cassette, sub-family A (ABC1), member 9 [Source:MGI Symbol;Acc:MGI:2386796]	ENSMUST00000044850,ENSMUST00000126499	3.68328	105	3.26045	90	2.60344	64	3.77976	130	3.93172	82	6.27959	182	4.92791	88
ENSMUSG00000022037	Clu	237.543	251.396	219.073	1.17878	0.237298	0.0192869	0.549583	14	65968483	65981547	1	protein_coding	clusterin [Source:MGI Symbol;Acc:MGI:88423]	ENSMUST00000022616,ENSMUST00000127387,ENSMUST00000128539,ENSMUST00000138191,ENSMUST00000138665,ENSMUST00000144619,ENSMUST00000146990,ENSMUST00000152903,ENSMUST00000153460	235.449	6712	266.125	7346	233.699	5745	270.311	9297	241.609	5039	181.142	5250	234.468	4187
ENSMUSG00000039782	Cpeb2	46.2997	48.9419	42.7767	1.17149	0.228348	0.0194495	0.55151	5	43233170	43289724	1	protein_coding	cytoplasmic polyadenylation element binding protein 2 [Source:MGI Symbol;Acc:MGI:2442640]	ENSMUST00000114065,ENSMUST00000114066,ENSMUST00000127599,ENSMUST00000166713,ENSMUST00000169035,ENSMUST00000198754,ENSMUST00000200685	45.4271	1295	50.3196	1389	49.7501	1223	50.2708	1729	42.4338	885	44.2331	1282	41.6632	744
ENSMUSG00000116864	Gm3320	1.34291	0.827546	2.03005	-1.89446	-0.921789	0.0194598	0.55151	17	16669156	16670186	-1	processed_pseudogene	predicted pseudogene 3320 [Source:MGI Symbol;Acc:MGI:3781498]	ENSMUST00000231447	0	0	1.63022	45	0.894933	22	0.785026	27	1.86996	39	2.48423	72	1.73597	31
ENSMUSG00000040829	Zmynd15	3.21291	3.65141	2.62826	1.55338	0.63541	0.0194799	0.55151	11	70459433	70466202	1	protein_coding	zinc finger, MYND-type containing 15 [Source:MGI Symbol;Acc:MGI:3603821]	ENSMUST00000039093,ENSMUST00000092958,ENSMUST00000108563,ENSMUST00000126105,ENSMUST00000136029,ENSMUST00000147289	2.38536	68	3.94876	109	5.04417	124	3.22733	111	3.16456	66	2.76026	80	1.95996	35
ENSMUSG00000064325	Hhip	1.40827	1.94764	0.689103	2.13812	1.09634	0.0195251	0.55151	8	79965851	80058006	-1	protein_coding	Hedgehog-interacting protein [Source:MGI Symbol;Acc:MGI:1341847]	ENSMUST00000079038,ENSMUST00000155850	3.54297	101	1.66645	46	1.09833	27	1.48283	51	0.239739	5	0.931587	27	0.895983	16
ENSMUSG00000046618	Olfml2a	31.8517	35.1136	27.5024	1.24372	0.314666	0.0195417	0.55151	2	38931978	38963753	1	protein_coding	olfactomedin-like 2A [Source:MGI Symbol;Acc:MGI:2444741]	ENSMUST00000057279	37.4993	1069	29.018	801	37.099	912	36.8381	1267	30.0633	627	27.1885	788	25.2555	451
ENSMUSG00000074227	Spint2	31.0328	28.3857	34.5623	-1.23909	-0.309283	0.0197113	0.555232	7	29256323	29281912	-1	protein_coding	serine protease inhibitor, Kunitz type 2 [Source:MGI Symbol;Acc:MGI:1338031]	ENSMUST00000098604,ENSMUST00000108236,ENSMUST00000207601,ENSMUST00000208585	31.15	888	26.3009	726	26.5225	652	29.5693	1017	37.0637	773	25.9119	751	40.7112	727
ENSMUSG00000045725	Prr15	2.41069	1.91019	3.07803	-1.62539	-0.700784	0.0198458	0.557646	6	54325835	54330201	1	protein_coding	proline rich 15 [Source:MGI Symbol;Acc:MGI:1925254]	ENSMUST00000059138,ENSMUST00000204057	1.96442	56	1.63022	45	1.74919	43	2.29693	79	2.44534	51	3.48483	101	3.30394	59
ENSMUSG00000031273	Col4a6	95.1916	100.878	87.6098	1.16214	0.216787	0.0199028	0.557646	X	141165403	141474076	-1	protein_coding	collagen, type IV, alpha 6 [Source:MGI Symbol;Acc:MGI:2152695]	ENSMUST00000101205,ENSMUST00000137051,ENSMUST00000151459	97.7648	2787	94.9877	2622	98.646	2425	112.113	3856	93.9777	1960	82.2212	2383	86.6304	1547
ENSMUSG00000022512	Cldn1	3.92183	4.70657	2.87551	1.52393	0.6078	0.0199105	0.557646	16	26356642	26371841	-1	protein_coding	claudin 1 [Source:MGI Symbol;Acc:MGI:1276109]	ENSMUST00000023154,ENSMUST00000232215	5.71786	163	3.7314	103	4.0272	99	5.34981	184	2.06176	43	3.48483	101	3.07994	55
ENSMUSG00000031409	Tceal6	1.13487	1.38534	0.800918	2.31526	1.21117	0.0199538	0.557687	X	135208687	135210687	-1	protein_coding	transcription elongation factor A (SII)-like 6 [Source:MGI Symbol;Acc:MGI:1923939]	ENSMUST00000033783	1.05237	30	1.594	44	1.38308	34	1.5119	52	0.239739	5	0.483045	14	1.67997	30
ENSMUSG00000076138	Gm26377	12.8908	15.4208	9.51736	1.86117	0.896207	0.020025	0.557687	9	78478528	78478635	-1	miRNA	predicted gene, 26377 [Source:MGI Symbol;Acc:MGI:5456154]	ENSMUST00000102184	12.7336	363	20.7944	574	10.7392	264	17.416	599	3.73993	78	14.2843	414	10.5278	188
ENSMUSG00000079575	Rbpj-ps3	0.719486	0.815584	0.591356	12.9374	3.69348	0.0200456	0.557687	6	46529354	46530794	-1	processed_pseudogene	recombination signal binding protein for immunoglobulin kappa J region, pseudogene 3 [Source:MGI Symbol;Acc:MGI:96525]	ENSMUST00000182751	0	0	1.12304	31	0.97629	24	1.163	40	1.77407	37	0	0	0	0
ENSMUSG00000034898	Filip1	45.1279	47.5452	41.9049	1.1761	0.234012	0.0200792	0.557687	9	79805094	80012851	-1	protein_coding	filamin A interacting protein 1 [Source:MGI Symbol;Acc:MGI:1917848]	ENSMUST00000093811,ENSMUST00000172740,ENSMUST00000172973,ENSMUST00000217264,ENSMUST00000239133	42.4805	1211	49.3777	1363	49.9128	1227	48.41	1665	38.7418	808	43.8536	1271	43.1192	770
ENSMUSG00000021792	Prxl2a	35.1976	36.9036	32.9229	1.19186	0.253219	0.020128	0.557687	14	40993740	41013788	-1	protein_coding	peroxiredoxin like 2A [Source:MGI Symbol;Acc:MGI:1917814]	ENSMUST00000022317,ENSMUST00000118466,ENSMUST00000128236,ENSMUST00000130166,ENSMUST00000134715,ENSMUST00000135797,ENSMUST00000136661,ENSMUST00000143143,ENSMUST00000152837,ENSMUST00000153830	29.8872	852	39.4876	1090	38.3194	942	39.92	1373	32.0291	668	32.9161	954	33.8234	604
ENSMUSG00000022840	Adcy5	84.0142	88.7246	77.7337	1.18927	0.250078	0.0201391	0.557687	16	35154877	35305738	1	protein_coding	adenylate cyclase 5 [Source:MGI Symbol;Acc:MGI:99673]	ENSMUST00000114913,ENSMUST00000232470	77.2788	2203	87.5249	2416	104.788	2576	85.3062	2934	84.9156	1771	70.5591	2045	77.7265	1388
ENSMUSG00000026638	Irf6	12.8017	14.4061	10.6626	1.28891	0.366155	0.0202801	0.559754	1	193153111	193172023	1	protein_coding	interferon regulatory factor 6 [Source:MGI Symbol;Acc:MGI:1859211]	ENSMUST00000076521,ENSMUST00000138826,ENSMUST00000140066,ENSMUST00000193772	16.4169	468	13.549	374	14.6037	359	13.0547	449	10.98	229	10.1439	294	10.8638	194
ENSMUSG00000041120	Nbl1	13.4525	14.6319	11.8801	1.29396	0.371792	0.0203229	0.559754	4	139082284	139092993	-1	protein_coding	NBL1, DAN family BMP antagonist [Source:MGI Symbol;Acc:MGI:104591]	ENSMUST00000042844,ENSMUST00000132900,ENSMUST00000132940	12.453	355	13.5852	375	16.5563	407	15.9331	548	11.987	250	10.6615	309	12.9918	232
ENSMUSG00000098292	Gm27194	1.09536	0.724038	1.59045	-1.89321	-0.920833	0.0204015	0.559754	11	62749852	62752787	1	lncRNA	predicted gene 27194 [Source:MGI Symbol;Acc:MGI:5521037]	ENSMUST00000175753	0.420946	12	0.90568	25	0.813575	20	0.755951	26	1.58228	33	1.17311	34	2.01596	36
ENSMUSG00000001288	Rarg	46.2851	42.0539	51.9268	-1.26402	-0.338019	0.0204855	0.559754	15	102234938	102257517	-1	protein_coding	retinoic acid receptor, gamma [Source:MGI Symbol;Acc:MGI:97858]	ENSMUST00000043172,ENSMUST00000063339,ENSMUST00000124224,ENSMUST00000130204,ENSMUST00000135466,ENSMUST00000155563,ENSMUST00000230330	45.6025	1300	34.4158	950	43.5669	1071	44.6302	1535	62.9555	1313	45.7858	1327	47.0391	840
ENSMUSG00000000805	Car4	4.59182	5.23847	3.72964	1.49706	0.582128	0.0205002	0.559754	11	84957786	84966044	1	protein_coding	carbonic anhydrase 4 [Source:MGI Symbol;Acc:MGI:1096574]	ENSMUST00000103194,ENSMUST00000108076,ENSMUST00000127827,ENSMUST00000138331,ENSMUST00000139416,ENSMUST00000150596	4.27962	122	6.15862	170	5.77638	142	4.73923	163	3.50019	73	3.2088	93	4.47992	80
ENSMUSG00000026639	Lamb3	9.68766	10.8053	8.19751	1.36134	0.445024	0.0205174	0.559754	1	193207699	193343878	1	protein_coding	laminin, beta 3 [Source:MGI Symbol;Acc:MGI:99915]	ENSMUST00000016315,ENSMUST00000159955,ENSMUST00000161526,ENSMUST00000162180,ENSMUST00000162977,ENSMUST00000192322,ENSMUST00000193128,ENSMUST00000194407,ENSMUST00000194677	9.85716	281	12.4259	343	11.8375	291	9.10049	313	9.58956	200	6.65912	193	8.34384	149
ENSMUSG00000001119	Col6a1	85.8078	81.1819	91.9758	-1.18714	-0.247492	0.0205293	0.559754	10	76708792	76726168	-1	protein_coding	collagen, type VI, alpha 1 [Source:MGI Symbol;Acc:MGI:88459]	ENSMUST00000001147,ENSMUST00000137599	92.2574	2630	69.3026	1913	74.6048	1834	88.5626	3046	102.8	2144	80.8411	2343	92.2863	1648
ENSMUSG00000069601	Ank3	183.869	193.55	170.961	1.16288	0.217708	0.0205963	0.559754	10	69398773	70027438	1	protein_coding	ankyrin 3, epithelial [Source:MGI Symbol;Acc:MGI:88026]	ENSMUST00000047061,ENSMUST00000054167,ENSMUST00000092431,ENSMUST00000092432,ENSMUST00000092433,ENSMUST00000092434,ENSMUST00000181974,ENSMUST00000182029,ENSMUST00000182142,ENSMUST00000182155,ENSMUST00000182162,ENSMUST00000182194,ENSMUST00000182207,ENSMUST00000182239,ENSMUST00000182269,ENSMUST00000182367,ENSMUST00000182373,ENSMUST00000182379,ENSMUST00000182437,ENSMUST00000182439,ENSMUST00000182474,…	177.85	5070	201.351	5558	199.529	4905	195.472	6723	175.345	3657	170.549	4943	166.989	2982
ENSMUSG00000020577	Tspan13	52.5616	50.2028	55.7067	-1.1729	-0.23008	0.0205975	0.559754	12	36014557	36042500	-1	protein_coding	tetraspanin 13 [Source:MGI Symbol;Acc:MGI:1913359]	ENSMUST00000020896,ENSMUST00000220641,ENSMUST00000222584	58.3011	1662	47.8923	1322	51.0925	1256	43.5254	1497	60.0786	1253	54.0666	1567	52.975	946
ENSMUSG00000022096	Hr	8.3666	6.98681	10.2063	-1.44788	-0.533946	0.0206329	0.559754	14	70552212	70573548	1	protein_coding	lysine demethylase and nuclear receptor corepressor [Source:MGI Symbol;Acc:MGI:96223]	ENSMUST00000022691,ENSMUST00000159959,ENSMUST00000161069,ENSMUST00000161468,ENSMUST00000163060	6.84038	195	5.28917	146	7.64761	188	8.17009	281	12.0349	251	7.83223	227	10.7518	192
ENSMUSG00000023913	Pla2g7	8.01652	7.11003	9.22518	-1.34188	-0.424255	0.020637	0.559754	17	43568098	43612201	1	protein_coding	phospholipase A2, group VII (platelet-activating factor acetylhydrolase, plasma) [Source:MGI Symbol;Acc:MGI:1351327]	ENSMUST00000024706,ENSMUST00000163489,ENSMUST00000165706,ENSMUST00000167214,ENSMUST00000167418,ENSMUST00000169694	7.78751	222	7.31789	202	7.60693	187	5.72779	197	9.87725	206	9.90243	287	7.89585	141
ENSMUSG00000072772	Grcc10	57.1385	52.8386	62.8716	-1.18681	-0.247093	0.0206697	0.559754	6	124739183	124741374	-1	protein_coding	gene rich cluster, C10 gene [Source:MGI Symbol;Acc:MGI:1315201]	ENSMUST00000004389,ENSMUST00000129823,ENSMUST00000137318,ENSMUST00000140423	52.478	1496	50.9354	1406	58.4554	1437	49.4857	1702	67.7982	1414	57.0338	1653	63.7828	1139
ENSMUSG00000040016	Ptger3	2.40578	2.10007	2.8134	-1.621	-0.696885	0.0207638	0.560903	3	157566892	157645888	1	protein_coding	prostaglandin E receptor 3 (subtype EP3) [Source:MGI Symbol;Acc:MGI:97795]	ENSMUST00000041175,ENSMUST00000173533,ENSMUST00000196682	3.22726	92	1.70268	47	1.87122	46	1.59913	55	2.34944	49	3.34681	97	2.74395	49
ENSMUSG00000057329	Bcl2	32.6031	34.6299	29.9007	1.19404	0.255848	0.0207893	0.560903	1	106538178	106714274	-1	protein_coding	B cell leukemia/lymphoma 2 [Source:MGI Symbol;Acc:MGI:88138]	ENSMUST00000112751,ENSMUST00000189999	31.5008	898	37.785	1043	35.7973	880	33.4363	1150	32.5566	679	28.8102	835	28.3355	506
ENSMUSG00000051703	Tmem198	0.967498	0.73368	1.27926	-2.04859	-1.03463	0.0208263	0.560903	1	75479532	75485705	1	protein_coding	transmembrane protein 198 [Source:MGI Symbol;Acc:MGI:2443133]	ENSMUST00000050899,ENSMUST00000113575,ENSMUST00000148980,ENSMUST00000187411	1.08745	31	0.434726	12	0.772896	19	0.639651	22	1.67817	35	1.20761	35	0.951982	17
ENSMUSG00000025515	Muc2	2.31624	2.69712	1.8084	1.64927	0.72183	0.020972	0.56337	7	141690340	141754693	1	protein_coding	mucin 2 [Source:MGI Symbol;Acc:MGI:1339364]	ENSMUST00000026590,ENSMUST00000167366,ENSMUST00000179227,ENSMUST00000185406,ENSMUST00000185823,ENSMUST00000187789,ENSMUST00000187945,ENSMUST00000191587	1.92934	55	2.97063	82	3.21362	79	2.6749	92	2.2056	46	1.48364	43	1.73597	31
ENSMUSG00000032908	Sgpp2	1.77167	2.22938	1.1614	1.77849	0.830651	0.0209944	0.56337	1	78310345	78420289	1	protein_coding	sphingosine-1-phosphate phosphotase 2 [Source:MGI Symbol;Acc:MGI:3589109]	ENSMUST00000036172	2.87647	82	2.06495	57	2.1153	52	1.8608	64	0.863061	18	1.72516	50	0.895983	16
ENSMUSG00000036040	Adamtsl2	31.1694	33.945	27.4687	1.29301	0.370732	0.0212352	0.567915	2	27079379	27108981	1	protein_coding	ADAMTS-like 2 [Source:MGI Symbol;Acc:MGI:1925044]	ENSMUST00000091233,ENSMUST00000130600,ENSMUST00000139633,ENSMUST00000143246,ENSMUST00000169787	30.3432	865	32.4958	897	39.8245	979	33.1165	1139	30.1592	629	20.9435	607	31.3034	559
ENSMUSG00000098178	Gm42418	1323.33	1178.42	1516.55	-1.27318	-0.348432	0.0212409	0.567915	17	39846958	39848788	1	lncRNA	predicted gene, 42418 [Source:MGI Symbol;Acc:MGI:5649005]	ENSMUST00000182010	1159.67	33059	1044.94	28844	1267.43	31157	1241.65	42705	1543.39	32189	1252.88	36312	1753.38	31311
ENSMUSG00000032440	Tgfbr2	39.1617	36.5861	42.5958	-1.1952	-0.257249	0.0213223	0.569059	9	116084293	116175360	-1	protein_coding	transforming growth factor, beta receptor II [Source:MGI Symbol;Acc:MGI:98729]	ENSMUST00000035014,ENSMUST00000061101	39.4988	1126	30.9018	853	36.0821	887	39.8619	1371	37.1596	775	49.1326	1424	41.4952	741
ENSMUSG00000050856	Atp5k	57.3939	52.357	64.1098	-1.18268	-0.242058	0.0214993	0.572745	5	108433244	108434448	-1	protein_coding	ATP synthase, H+ transporting, mitochondrial F1F0 complex, subunit E [Source:MGI Symbol;Acc:MGI:106636]	ENSMUST00000049628,ENSMUST00000118632,ENSMUST00000123184	45.813	1306	51.0079	1408	63.9063	1571	48.7007	1675	63.6267	1327	63.0719	1828	65.6308	1172
ENSMUSG00000027559	Car3	31.6654	29.4621	34.6031	-1.21229	-0.277731	0.0215541	0.573168	3	14863512	14872523	1	protein_coding	carbonic anhydrase 3 [Source:MGI Symbol;Acc:MGI:88270]	ENSMUST00000029076,ENSMUST00000195575,ENSMUST00000195834	32.483	926	26.6632	736	27.6209	679	31.0812	1069	37.5431	783	29.8108	864	36.4553	651
ENSMUSG00000030102	Itpr1	98.8161	105.446	89.9759	1.16246	0.217182	0.0216618	0.573511	6	108213096	108551109	1	protein_coding	inositol 1,4,5-trisphosphate receptor 1 [Source:MGI Symbol;Acc:MGI:96623]	ENSMUST00000032192,ENSMUST00000203262,ENSMUST00000203288,ENSMUST00000203530,ENSMUST00000203615,ENSMUST00000203638,ENSMUST00000203687,ENSMUST00000203936,ENSMUST00000203995,ENSMUST00000205005,ENSMUST00000205048,ENSMUST00000205053,ENSMUST00000212125	107.236	3057	91.8722	2536	112.599	2768	110.078	3786	89.9021	1875	96.195	2788	83.8304	1497
ENSMUSG00000113343	Gm34923	0.823825	1.05916	0.510042	2.04481	1.03197	0.0216796	0.573511	12	39485844	39526955	-1	lncRNA	predicted gene, 34923 [Source:MGI Symbol;Acc:MGI:5594082]	ENSMUST00000222673	1.08745	31	1.05059	29	0.935611	23	1.163	40	0.383582	8	0.586555	17	0.559989	10
ENSMUSG00000102972	Gm37348	7.89227	6.18715	10.1658	-1.44992	-0.535971	0.0216838	0.573511	3	41976335	41978123	1	processed_pseudogene	predicted gene, 37348 [Source:MGI Symbol;Acc:MGI:5610576]	ENSMUST00000193104	4.45502	127	5.47031	151	7.72896	190	7.09431	244	8.34292	174	7.31468	212	14.8397	265
ENSMUSG00000023017	Asic1	15.2719	16.7172	13.3449	1.31018	0.389764	0.021782	0.575075	15	99670368	99701130	1	protein_coding	acid-sensing (proton-gated) ion channel 1 [Source:MGI Symbol;Acc:MGI:1194915]	ENSMUST00000023758,ENSMUST00000226291,ENSMUST00000227670,ENSMUST00000228012,ENSMUST00000228185,ENSMUST00000228610	15.2593	435	16.7007	461	16.0681	395	18.8406	648	17.1653	358	10.6615	309	12.2078	218
ENSMUSG00000079481	Nhsl2	59.9794	64.375	54.1186	1.17485	0.232473	0.0219944	0.579512	X	101849385	102092055	1	protein_coding	NHS-like 2 [Source:MGI Symbol;Acc:MGI:3645090]	ENSMUST00000101339,ENSMUST00000124279,ENSMUST00000125115,ENSMUST00000129185,ENSMUST00000144397,ENSMUST00000144753,ENSMUST00000155477	67.6671	1929	60.8617	1680	62.5639	1538	66.4074	2284	47.804	997	62.8649	1822	51.687	923
ENSMUSG00000054051	Ercc6	29.6204	31.7555	26.7736	1.20137	0.264676	0.0220287	0.579512	14	32513521	32580990	1	protein_coding	excision repair cross-complementing rodent repair deficiency, complementation group 6 [Source:MGI Symbol;Acc:MGI:1100494]	ENSMUST00000066807,ENSMUST00000226285,ENSMUST00000227434,ENSMUST00000228017,ENSMUST00000228035,ENSMUST00000228549	30.5186	870	32.3147	892	31.5667	776	32.6222	1122	26.0836	544	28.0856	814	26.1515	467
ENSMUSG00000068735	Trp53i11	27.1927	24.5794	30.6771	-1.24375	-0.314701	0.0221349	0.581269	2	93187548	93201759	1	protein_coding	transformation related protein 53 inducible protein 11 [Source:MGI Symbol;Acc:MGI:2670995]	ENSMUST00000090554,ENSMUST00000111266,ENSMUST00000127173,ENSMUST00000132182,ENSMUST00000140172,ENSMUST00000143164,ENSMUST00000147377,ENSMUST00000150462	24.8709	709	26.3372	727	23.675	582	23.4345	806	26.1316	545	36.7804	1066	29.1195	520
ENSMUSG00000036611	Eepd1	21.8892	23.2514	20.0729	1.21971	0.286534	0.0222961	0.581612	9	25481547	25604110	1	protein_coding	endonuclease/exonuclease/phosphatase family domain containing 1 [Source:MGI Symbol;Acc:MGI:1914734]	ENSMUST00000040677,ENSMUST00000156237	19.6442	560	25.4315	702	23.1869	570	24.7429	851	21.7204	453	18.5627	538	19.9356	356
ENSMUSG00000028005	Gucy1b1	78.5775	76.0812	81.9058	-1.15394	-0.206562	0.0223106	0.581612	3	82032006	82074689	-1	protein_coding	guanylate cyclase 1, soluble, beta 1 [Source:MGI Symbol;Acc:MGI:1860604]	ENSMUST00000029635,ENSMUST00000192508,ENSMUST00000193085,ENSMUST00000193597	92.3627	2633	67.129	1853	73.8319	1815	71.0013	2442	69.6202	1452	89.4669	2593	86.6304	1547
ENSMUSG00000084838	Gm10241	10.8247	9.26681	12.9018	-1.38041	-0.465093	0.0223222	0.581612	16	20176727	20177012	-1	processed_pseudogene	predicted pseudogene 10241 [Source:MGI Symbol;Acc:MGI:3704461]	ENSMUST00000117664	8.87496	253	9.0568	250	11.6341	286	7.50136	258	15.1036	315	10.834	314	12.7678	228
ENSMUSG00000020961	Ston2	3.93454	4.61603	3.0259	1.51727	0.601475	0.0223351	0.581612	12	91633009	91788387	-1	protein_coding	stonin 2 [Source:MGI Symbol;Acc:MGI:1918272]	ENSMUST00000052969,ENSMUST00000111609,ENSMUST00000164713,ENSMUST00000166008,ENSMUST00000166967,ENSMUST00000170077,ENSMUST00000170984	4.66549	133	4.78199	132	3.78312	93	5.23351	180	2.34944	49	3.31231	96	3.41594	61
ENSMUSG00000117165	Gm49832	4.9696	4.31187	5.84657	-1.65012	-0.722567	0.0223454	0.581612	17	39636968	39637144	-1	processed_pseudogene	predicted gene, 49832 [Source:MGI Symbol;Acc:MGI:6270499]	ENSMUST00000232791	5.68278	162	2.1374	59	7.15946	176	2.26785	78	7.24012	151	7.10766	206	3.19194	57
ENSMUSG00000066113	Adamtsl1	50.0649	56.214	41.8662	1.20671	0.271079	0.0225411	0.585671	4	85514172	86428385	1	protein_coding	ADAMTS-like 1 [Source:MGI Symbol;Acc:MGI:1924989]	ENSMUST00000048885,ENSMUST00000107177,ENSMUST00000107178,ENSMUST00000120678,ENSMUST00000126654,ENSMUST00000130474,ENSMUST00000136320,ENSMUST00000136418,ENSMUST00000141889,ENSMUST00000147066,ENSMUST00000150043,ENSMUST00000213098	72.7185	2073	42.893	1184	57.3164	1409	51.928	1786	45.1189	941	42.6805	1237	37.7993	675
ENSMUSG00000029545	Acads	75.3486	69.5383	83.0957	-1.14554	-0.196034	0.0226634	0.587812	5	115110299	115119346	-1	protein_coding	acyl-Coenzyme A dehydrogenase, short chain [Source:MGI Symbol;Acc:MGI:87868]	ENSMUST00000031524,ENSMUST00000131726,ENSMUST00000141142,ENSMUST00000153374	60.5111	1725	71.1502	1964	71.798	1765	74.6938	2569	83.5251	1742	84.8434	2459	80.9185	1445
ENSMUSG00000046636	Gm7729	2.48953	2.94091	1.88769	2.16777	1.11621	0.0228288	0.591061	18	27598644	27599756	1	unprocessed_pseudogene	predicted gene 7729 [Source:MGI Symbol;Acc:MGI:3647361]	ENSMUST00000050143	2.38536	68	3.3329	92	3.45769	85	2.58768	89	2.49329	52	3.00178	87	0.167997	3
ENSMUSG00000094365	Gm21982	3.199	2.70246	3.86106	-1.53391	-0.617214	0.0229827	0.592366	7	30641001	30664937	-1	lncRNA	predicted gene 21982 [Source:MGI Symbol;Acc:MGI:5439451]	ENSMUST00000146232	3.05186	87	2.1374	59	3.90516	96	1.71543	59	3.88377	81	4.89946	142	2.79995	50
ENSMUSG00000025979	Mob4	72.1349	75.6978	67.3843	1.15162	0.203663	0.0229829	0.592366	1	55131231	55154899	1	protein_coding	MOB family member 4, phocein [Source:MGI Symbol;Acc:MGI:104899]	ENSMUST00000027122,ENSMUST00000159311,ENSMUST00000159743,ENSMUST00000161122,ENSMUST00000162364,ENSMUST00000162553,ENSMUST00000162930,ENSMUST00000187422	70.1928	2001	78.5043	2167	77.4524	1904	76.6418	2636	62.7157	1308	70.1106	2032	69.3267	1238
ENSMUSG00000031661	Nkd1	27.5558	29.4347	25.0505	1.19911	0.261967	0.0229998	0.592366	8	88521354	88594884	1	protein_coding	naked cuticle 1 [Source:MGI Symbol;Acc:MGI:2135954]	ENSMUST00000034086,ENSMUST00000169179,ENSMUST00000211113	27.9579	797	33.0392	912	28.5972	703	28.1446	968	28.9125	603	22.0476	639	24.1915	432
ENSMUSG00000097619	4833422M21Rik	1.05191	1.296	0.726462	1.88465	0.914294	0.023067	0.593061	15	96231870	96254684	-1	lncRNA	RIKEN cDNA 4833422M21 gene [Source:MGI Symbol;Acc:MGI:1923018]	ENSMUST00000181122,ENSMUST00000181252,ENSMUST00000181747,ENSMUST00000229950	1.05237	30	1.52154	42	1.30172	32	1.30838	45	0.623322	13	0.828077	24	0.727986	13
ENSMUSG00000101680	Gm29015	6.33106	5.0199	8.07928	-1.44447	-0.530539	0.0231911	0.595212	14	54973029	54973359	1	lncRNA	predicted gene 29015 [Source:MGI Symbol;Acc:MGI:5579721]	ENSMUST00000187147	3.54297	101	6.52089	180	5.45095	134	4.56478	157	9.20598	192	5.62403	163	9.40782	168
ENSMUSG00000087013	2610027K06Rik	2.03752	2.37034	1.59375	1.64861	0.721253	0.0232617	0.595985	11	85791661	85832223	-1	lncRNA	RIKEN cDNA 2610027K06 gene [Source:MGI Symbol;Acc:MGI:1917159]	ENSMUST00000128213,ENSMUST00000136117,ENSMUST00000140673	1.64871	47	2.71704	75	2.44073	60	2.6749	92	1.67817	35	1.31112	38	1.79197	32
ENSMUSG00000068457	Uty	14.5399	18.4041	9.38764	1.71423	0.777559	0.0233276	0.596635	Y	1096861	1245759	-1	protein_coding	ubiquitously transcribed tetratricopeptide repeat gene, Y chromosome [Source:MGI Symbol;Acc:MGI:894810]	ENSMUST00000069309,ENSMUST00000133976,ENSMUST00000137048,ENSMUST00000139365,ENSMUST00000143286,ENSMUST00000143958,ENSMUST00000150715,ENSMUST00000154004,ENSMUST00000154527,ENSMUST00000154666,ENSMUST00000157073,ENSMUST00000185837	23.573	672	7.93375	219	21.8445	537	20.2653	697	11.8431	247	5.62403	163	10.6958	191
ENSMUSG00000021846	Peli2	20.6697	23.0966	17.4338	1.22702	0.295154	0.0234151	0.597835	14	48120823	48281575	1	protein_coding	pellino 2 [Source:MGI Symbol;Acc:MGI:1891445]	ENSMUST00000073150,ENSMUST00000081029,ENSMUST00000226260,ENSMUST00000226513,ENSMUST00000226828,ENSMUST00000227362,ENSMUST00000228456,ENSMUST00000228519	28.1683	803	20.1785	557	22.9021	563	21.1376	727	17.0215	355	17.9762	521	17.3037	309
ENSMUSG00000054944	5330416C01Rik	3.24453	3.81536	2.48343	1.70239	0.767559	0.0235563	0.599536	13	97733498	97747411	-1	lncRNA	RIKEN cDNA 5330416C01 gene [Source:MGI Symbol;Acc:MGI:2685378]	ENSMUST00000123535,ENSMUST00000125960,ENSMUST00000144993	2.4906	71	3.44158	95	5.89842	145	3.43086	118	2.58918	54	1.72516	50	3.13594	56
ENSMUSG00000020326	Ccng1	188.677	199.071	174.818	1.16464	0.219885	0.0235631	0.599536	11	40748552	40755311	-1	protein_coding	cyclin G1 [Source:MGI Symbol;Acc:MGI:102890]	ENSMUST00000020576,ENSMUST00000151359	184.515	5260	209.103	5772	187.977	4621	214.69	7384	171.557	3578	174.931	5070	177.965	3178
ENSMUSG00000006649	Nphs1	4.507	3.731	5.54166	-1.48423	-0.569717	0.0237111	0.602262	7	30458315	30487223	1	protein_coding	nephrosis 1, nephrin [Source:MGI Symbol;Acc:MGI:1859637]	ENSMUST00000006825,ENSMUST00000123880,ENSMUST00000126297,ENSMUST00000131004,ENSMUST00000149086	3.99899	114	3.80385	105	3.45769	85	3.66346	126	4.84273	101	4.2784	124	7.50386	134
ENSMUSG00000026640	Plxna2	61.087	58.5549	64.4631	-1.19989	-0.262897	0.0238029	0.603553	1	194618218	194816869	1	protein_coding	plexin A2 [Source:MGI Symbol;Acc:MGI:107684]	ENSMUST00000027952,ENSMUST00000124785,ENSMUST00000125381,ENSMUST00000135664,ENSMUST00000194398	71.0347	2025	41.5526	1147	63.1334	1552	58.499	2012	64.4419	1344	69.4205	2012	59.5269	1063
ENSMUSG00000014329	Bicc1	65.3691	61.7416	70.2058	-1.17884	-0.23737	0.0239078	0.604603	10	70922832	71159700	-1	protein_coding	BicC family RNA binding protein 1 [Source:MGI Symbol;Acc:MGI:1933388]	ENSMUST00000014473,ENSMUST00000131445,ENSMUST00000143791,ENSMUST00000144740	66.4394	1894	57.1303	1577	50.3603	1238	73.0365	2512	65.5447	1367	71.0421	2059	74.0306	1322
ENSMUSG00000054863	Tafa5	10.4649	11.5408	9.03039	1.34008	0.422314	0.0239264	0.604603	15	87544299	87759364	1	protein_coding	TAFA chemokine like family member 5 [Source:MGI Symbol;Acc:MGI:2146182]	ENSMUST00000068088,ENSMUST00000230414	10.1729	290	13.0056	359	12.285	302	10.6996	368	9.9252	207	7.14217	207	10.0238	179
ENSMUSG00000094410	Gm38394	103.662	112.549	91.8125	1.17208	0.229065	0.0239829	0.604993	1	133619940	133661318	-1	protein_coding	predicted gene, 38394 [Source:MGI Symbol;Acc:MGI:5614057]	ENSMUST00000179598	126.529	3607	97.4511	2690	105.643	2597	120.574	4147	91.916	1917	98.4032	2852	85.1184	1520
ENSMUSG00000026185	Igfbp5	1669.06	1811.94	1478.55	1.23639	0.306133	0.0244876	0.616668	1	72857932	72874884	-1	protein_coding	insulin-like growth factor binding protein 5 [Source:MGI Symbol;Acc:MGI:96440]	ENSMUST00000027377,ENSMUST00000137339	1768.36	50411	1773.1	48944	1837.42	45169	1868.86	64277	1576.76	32885	1418.15	41102	1440.74	25728
ENSMUSG00000049233	Apoo-ps	0.704549	0.885338	0.463496	4.12049	2.04282	0.0245636	0.617527	13	107414144	107414729	-1	processed_pseudogene	apolipoprotein O, pseudogene [Source:MGI Symbol;Acc:MGI:3649039]	ENSMUST00000061241	0.210473	6	1.70268	47	0	0	1.6282	56	1.39049	29	0	0	0	0
ENSMUSG00000049999	Ppp1r3d	29.0667	31.2092	26.2102	1.20224	0.265724	0.0247071	0.620076	2	178411206	178414472	-1	protein_coding	protein phosphatase 1, regulatory subunit 3D [Source:MGI Symbol;Acc:MGI:1917664]	ENSMUST00000058678	30.4835	869	30.7931	850	33.0312	812	30.5288	1050	23.4465	489	27.4646	796	27.7195	495
ENSMUSG00000091259	Vmn2r110	1.38196	1.00863	1.87974	-1.75093	-0.808124	0.0248344	0.621398	17	20567760	20596423	-1	protein_coding	vomeronasal 2, receptor 110 [Source:MGI Symbol;Acc:MGI:3644602]	ENSMUST00000169559,ENSMUST00000232904,ENSMUST00000233022,ENSMUST00000233630	0.736656	21	0.978134	27	0.691539	17	1.6282	56	1.72612	36	1.44914	42	2.46395	44
ENSMUSG00000039904	Gpr37	1.64518	2.05361	1.10062	1.75319	0.809986	0.0248441	0.621398	6	25665878	25690729	-1	protein_coding	G protein-coupled receptor 37 [Source:MGI Symbol;Acc:MGI:1313297]	ENSMUST00000054867,ENSMUST00000200812	2.38536	68	1.52154	42	2.15597	53	2.15155	74	1.15075	24	1.31112	38	0.839984	15
ENSMUSG00000032431	Crtap	94.0692	88.9255	100.927	-1.14033	-0.189458	0.024901	0.621765	9	114375134	114390675	-1	protein_coding	cartilage associated protein [Source:MGI Symbol;Acc:MGI:1891221]	ENSMUST00000084881,ENSMUST00000151377	90.5386	2581	86.2932	2382	89.2899	2195	89.5802	3081	92.6831	1933	105.269	3051	104.83	1872
ENSMUSG00000062997	Rpl35	148.618	136.146	165.246	-1.22075	-0.287762	0.0249876	0.622871	2	39001580	39005624	-1	protein_coding	ribosomal protein L35 [Source:MGI Symbol;Acc:MGI:1913739]	ENSMUST00000080861,ENSMUST00000126246,ENSMUST00000152441	136.001	3877	124.585	3439	163.569	4021	120.429	4142	161.68	3372	150.158	4352	183.901	3284
ENSMUSG00000032369	Plscr1	27.2256	25.5874	29.4099	-1.19253	-0.254026	0.0251649	0.626233	9	92249750	92272278	1	protein_coding	phospholipid scramblase 1 [Source:MGI Symbol;Acc:MGI:893575]	ENSMUST00000093801,ENSMUST00000186364,ENSMUST00000187952	28.3437	808	25.9024	715	24.4073	600	23.6962	815	30.3989	634	28.8792	837	28.9515	517
ENSMUSG00000027796	Smad9	29.1548	31.4268	26.1255	1.23317	0.302375	0.0252141	0.626397	3	54755582	54801257	1	protein_coding	SMAD family member 9 [Source:MGI Symbol;Acc:MGI:1859993]	ENSMUST00000029371	29.9223	853	30.5033	842	32.1362	790	33.1456	1140	31.3099	653	22.4271	650	24.6395	440
ENSMUSG00000027230	Creb3l1	21.9754	20.0618	24.5269	-1.21996	-0.286838	0.0254531	0.629337	2	91982328	92024502	-1	protein_coding	cAMP responsive element binding protein 3-like 1 [Source:MGI Symbol;Acc:MGI:1347062]	ENSMUST00000028663	19.7143	562	22.6782	626	19.7699	486	18.0847	622	25.0767	523	24.7043	716	23.7996	425
ENSMUSG00000050315	Synpo2	178.996	192.888	160.473	1.15625	0.209458	0.0254813	0.629337	3	123076519	123236149	-1	protein_coding	synaptopodin 2 [Source:MGI Symbol;Acc:MGI:2153070]	ENSMUST00000051443,ENSMUST00000106426,ENSMUST00000106427,ENSMUST00000139160,ENSMUST00000184403,ENSMUST00000184590,ENSMUST00000198584	214.823	6124	187.693	5181	190.255	4677	178.782	6149	159.331	3323	164.787	4776	157.301	2809
ENSMUSG00000026463	Atp2b4	228.493	244.2	207.549	1.17513	0.232822	0.0254996	0.629337	1	133699457	133801041	-1	protein_coding	ATPase, Ca++ transporting, plasma membrane 4 [Source:MGI Symbol;Acc:MGI:88111]	ENSMUST00000048953,ENSMUST00000112264,ENSMUST00000125659,ENSMUST00000128692,ENSMUST00000140810,ENSMUST00000143567,ENSMUST00000165602,ENSMUST00000167348	244.745	6977	230.296	6357	262.093	6443	239.666	8243	219.889	4586	201.05	5827	201.708	3602
ENSMUSG00000115293	Gm49333	1.76835	1.5609	2.04494	-2.98409	-1.57729	0.0255033	0.629337	16	20611610	20645920	1	protein_coding	predicted gene, 49333 [Source:MGI Symbol;Acc:MGI:6121518]	ENSMUST00000079600,ENSMUST00000120394	2.94663	84	0.941907	26	0	0	2.35508	81	1.67817	35	2.1047	61	2.35196	42
ENSMUSG00000079108	Srp54c	89.6423	84.2841	96.7867	-1.14975	-0.201326	0.0257084	0.633338	12	55230168	55263836	1	protein_coding	signal recognition particle 54C [Source:MGI Symbol;Acc:MGI:3714359]	ENSMUST00000164243,ENSMUST00000218879	85.1013	2426	85.6048	2363	82.7813	2035	83.6489	2877	87.313	1821	101.129	2931	101.918	1820
ENSMUSG00000024712	Rfk	41.9391	43.6049	39.718	1.16617	0.221783	0.0259347	0.637848	19	17394043	17401349	1	protein_coding	riboflavin kinase [Source:MGI Symbol;Acc:MGI:1914688]	ENSMUST00000025617,ENSMUST00000136162,ENSMUST00000146171	35.57	1014	48.798	1347	44.4619	1093	45.5897	1568	43.0092	897	37.9535	1100	38.1913	682
ENSMUSG00000046719	Nxph3	2.84019	3.33089	2.18593	1.55358	0.635601	0.0260683	0.639357	11	95509845	95514570	-1	protein_coding	neurexophilin 3 [Source:MGI Symbol;Acc:MGI:1336188]	ENSMUST00000058866	3.08694	88	3.26045	90	2.84751	70	4.12866	142	1.72612	36	2.31172	67	2.51995	45
ENSMUSG00000029366	Dck	59.6834	62.9137	55.3763	1.15876	0.21258	0.0260829	0.639357	5	88764996	88783281	1	protein_coding	deoxycytidine kinase [Source:MGI Symbol;Acc:MGI:102726]	ENSMUST00000031311,ENSMUST00000196967	58.8974	1679	66.6218	1839	59.5537	1464	66.5819	2290	54.1331	1129	58.0689	1683	53.927	963
ENSMUSG00000108037	Gm44597	4.32429	5.0912	3.30175	1.61453	0.691112	0.0263744	0.645427	6	125039816	125051542	1	lncRNA	predicted gene 44597 [Source:MGI Symbol;Acc:MGI:5753173]	ENSMUST00000140883,ENSMUST00000203287	4.63041	132	4.31104	119	4.88145	120	6.54189	225	4.60299	96	3.1743	92	2.12796	38
ENSMUSG00000103392	Gm38303	0.69228	0.929188	0.376403	2.42387	1.27731	0.0264283	0.645669	3	10321712	10335681	-1	protein_coding	predicted gene, 38303 [Source:MGI Symbol;Acc:MGI:5611531]	ENSMUST00000192603	1.05237	30	1.15927	32	1.50511	37	0	0	0.335635	7	0.793574	23	0	0
ENSMUSG00000021892	Sh3bp5	35.8724	32.7323	40.0591	-1.20436	-0.268263	0.0264719	0.645669	14	31359880	31436078	-1	protein_coding	SH3-domain binding protein 5 (BTK-associated) [Source:MGI Symbol;Acc:MGI:1344391]	ENSMUST00000091903,ENSMUST00000100730,ENSMUST00000140002,ENSMUST00000147586	31.3254	893	35.4664	979	30.265	744	33.8724	1165	43.5366	908	41.9214	1215	34.7193	620
ENSMUSG00000038463	Olfml2b	110.055	116.755	101.123	1.14298	0.1928	0.0267219	0.650688	1	170644532	170682789	1	protein_coding	olfactomedin-like 2B [Source:MGI Symbol;Acc:MGI:2443310]	ENSMUST00000046792	120.987	3449	116.652	3220	112.151	2757	117.231	4032	105.773	2206	91.8131	2661	105.782	1889
ENSMUSG00000109947	Gm45669	1.89486	1.44856	2.48992	-1.68471	-0.752498	0.0268151	0.651591	7	45091409	45098320	1	lncRNA	predicted gene 45669 [Source:MGI Symbol;Acc:MGI:5791505]	ENSMUST00000209808	1.40315	40	1.30418	36	1.3424	33	1.7445	60	3.11661	65	2.00119	58	2.35196	42
ENSMUSG00000066952	Myo1h	2.27371	1.78059	2.93122	-1.60118	-0.679138	0.0268666	0.651591	5	114289166	114365357	1	protein_coding	myosin 1H [Source:MGI Symbol;Acc:MGI:1914674]	ENSMUST00000124316,ENSMUST00000125230,ENSMUST00000128379,ENSMUST00000152694,ENSMUST00000169347,ENSMUST00000196467,ENSMUST00000196676,ENSMUST00000197773,ENSMUST00000199567,ENSMUST00000202006	1.61363	46	2.28231	63	1.42376	35	1.80265	62	3.2125	67	2.27721	66	3.30394	59
ENSMUSG00000043496	Tril	37.3538	40.4676	33.202	1.18743	0.247846	0.0268916	0.651591	6	53815468	53820830	-1	protein_coding	TLR4 interactor with leucine-rich repeats [Source:MGI Symbol;Acc:MGI:1914123]	ENSMUST00000127748	43.603	1243	38.9805	1076	37.099	912	42.1879	1451	36.0088	751	31.3979	910	32.1994	575
ENSMUSG00000040434	Large2	3.72148	4.48021	2.70985	1.49102	0.576304	0.0270174	0.653032	2	92365046	92374869	-1	protein_coding	LARGE xylosyl- and glucuronyltransferase 2 [Source:MGI Symbol;Acc:MGI:2443769]	ENSMUST00000068586,ENSMUST00000090582,ENSMUST00000111284,ENSMUST00000124428,ENSMUST00000130283,ENSMUST00000146311,ENSMUST00000148352,ENSMUST00000175740,ENSMUST00000175851,ENSMUST00000176289,ENSMUST00000176339,ENSMUST00000176402,ENSMUST00000176646,ENSMUST00000176774,ENSMUST00000176810,ENSMUST00000176820,ENSMUST00000177273	5.89325	168	3.91254	108	4.18991	103	3.92513	135	2.39739	50	2.48423	72	3.24794	58
ENSMUSG00000040296	Ddx58	6.50434	5.65736	7.63365	-1.36552	-0.449448	0.0270597	0.653032	4	40203773	40239828	-1	protein_coding	DEAD (Asp-Glu-Ala-Asp) box polypeptide 58 [Source:MGI Symbol;Acc:MGI:2442858]	ENSMUST00000037907,ENSMUST00000127026,ENSMUST00000135966,ENSMUST00000136435,ENSMUST00000137903,ENSMUST00000139110,ENSMUST00000139583,ENSMUST00000140616,ENSMUST00000142055,ENSMUST00000149539	5.96341	170	5.14426	142	5.53231	136	5.98946	206	6.18527	129	8.76382	254	7.95185	142
ENSMUSG00000032502	Stac	2.69348	3.23531	1.97103	1.57023	0.650977	0.0270877	0.653032	9	111561437	111690348	-1	protein_coding	src homology three (SH3) and cysteine rich domain [Source:MGI Symbol;Acc:MGI:1201400]	ENSMUST00000035083,ENSMUST00000161995,ENSMUST00000162345	3.78852	108	3.04308	84	2.96955	73	3.14011	108	2.30149	48	1.48364	43	2.12796	38
ENSMUSG00000008305	Tle1	44.3933	42.6319	46.7419	-1.17872	-0.237223	0.0271379	0.653032	4	72117142	72200919	-1	protein_coding	transducin-like enhancer of split 1 [Source:MGI Symbol;Acc:MGI:104636]	ENSMUST00000030095,ENSMUST00000072695,ENSMUST00000074216,ENSMUST00000102848,ENSMUST00000107337,ENSMUST00000123259,ENSMUST00000132550,ENSMUST00000134225,ENSMUST00000137075,ENSMUST00000140154	50.6188	1443	32.206	889	43.5669	1071	44.1359	1518	44.064	919	47.8905	1388	48.2711	862
ENSMUSG00000027684	Mecom	226.934	223.919	230.954	-1.1885	-0.249137	0.0272054	0.653032	3	29951296	30548008	-1	protein_coding	MDS1 and EVI1 complex locus [Source:MGI Symbol;Acc:MGI:95457]	ENSMUST00000061088,ENSMUST00000108270,ENSMUST00000108271,ENSMUST00000166001,ENSMUST00000170212,ENSMUST00000172694,ENSMUST00000172697,ENSMUST00000172754,ENSMUST00000173022,ENSMUST00000173059,ENSMUST00000173411,ENSMUST00000173495,ENSMUST00000173899,ENSMUST00000174406,ENSMUST00000174413,ENSMUST00000174428,ENSMUST00000195690	311.185	8871	169.507	4679	212.709	5229	202.275	6957	234.273	4886	212.195	6150	246.395	4400
ENSMUSG00000029861	Fam131b	12.5902	11.162	14.4943	-1.34195	-0.424326	0.0272171	0.653032	6	42315312	42324643	-1	protein_coding	family with sequence similarity 131, member B [Source:MGI Symbol;Acc:MGI:1923406]	ENSMUST00000031891,ENSMUST00000095974,ENSMUST00000143278	12.2776	350	8.6583	239	11.0646	272	12.6476	435	16.8776	352	11.7656	341	14.8397	265
ENSMUSG00000020656	Grhl1	15.9095	17.1281	14.2848	1.30471	0.383732	0.0273396	0.654906	12	24572283	24617391	1	protein_coding	grainyhead like transcription factor 1 [Source:MGI Symbol;Acc:MGI:2182540]	ENSMUST00000020985,ENSMUST00000085553,ENSMUST00000221426,ENSMUST00000223442	13.6106	388	20.8669	576	18.7122	460	15.3226	527	18.1722	379	10.1785	295	14.5037	259
ENSMUSG00000054763	Defb42	7.18776	7.98947	6.11882	1.35981	0.443406	0.0274477	0.656159	14	63046991	63058149	1	protein_coding	defensin beta 42 [Source:MGI Symbol;Acc:MGI:3033850]	ENSMUST00000067990,ENSMUST00000111203,ENSMUST00000138708,ENSMUST00000142140,ENSMUST00000186438	7.08593	202	9.16548	253	8.78661	216	6.91986	238	7.28807	152	5.24449	152	5.82389	104
ENSMUSG00000021223	Papln	1.48106	1.31151	1.70714	-1.92577	-0.945434	0.0275311	0.656159	12	83763634	83792382	1	protein_coding	papilin, proteoglycan-like sulfated glycoprotein [Source:MGI Symbol;Acc:MGI:2386139]	ENSMUST00000021646,ENSMUST00000121733,ENSMUST00000152904	2.31521	66	0.796998	22	0.447466	11	1.68635	58	2.01381	42	1.48364	43	1.62397	29
ENSMUSG00000091955	Gm9844	6.50266	7.37594	5.33828	1.36576	0.449704	0.0275396	0.656159	7	24862213	24862697	1	protein_coding	predicted pseudogene 9844 [Source:MGI Symbol;Acc:MGI:3704288]	ENSMUST00000170837	7.57704	216	8.2598	228	6.42724	158	7.23969	249	5.99348	125	5.03747	146	4.98391	89
ENSMUSG00000097216	4932441J04Rik	2.78133	2.32321	3.39216	-1.57316	-0.653668	0.0276018	0.656159	5	57570082	57720201	-1	lncRNA	RIKEN cDNA 4932441J04 gene [Source:MGI Symbol;Acc:MGI:2441691]	ENSMUST00000180708,ENSMUST00000193156	2.84139	81	1.84759	51	2.4814	61	2.12248	73	3.88377	81	2.93277	85	3.35994	60
ENSMUSG00000036533	Cdc42ep3	25.0307	26.6033	22.9338	1.19372	0.255465	0.0276146	0.656159	17	79333727	79355091	-1	protein_coding	CDC42 effector protein (Rho GTPase binding) 3 [Source:MGI Symbol;Acc:MGI:2384718]	ENSMUST00000068958,ENSMUST00000233363	24.3097	693	25.7575	711	29.0446	714	27.3015	939	21.3847	446	23.3932	678	24.0235	429
ENSMUSG00000078190	Dnm3os	81.1127	79.6678	83.0392	-1.18051	-0.239411	0.0277609	0.658082	1	162217623	162225550	1	lncRNA	dynamin 3, opposite strand [Source:MGI Symbol;Acc:MGI:3052332]	ENSMUST00000139662,ENSMUST00000178978,ENSMUST00000185878,ENSMUST00000231582,ENSMUST00000231725,ENSMUST00000232506	108.253	3086	60.7168	1676	81.5202	2004	68.181	2345	70.3874	1468	79.6679	2309	99.0621	1769
ENSMUSG00000026360	Rgs2	18.9448	21.2068	15.9289	1.26101	0.334577	0.0277971	0.658082	1	143999338	144004161	-1	protein_coding	regulator of G-protein signaling 2 [Source:MGI Symbol;Acc:MGI:1098271]	ENSMUST00000027606,ENSMUST00000127206,ENSMUST00000134817,ENSMUST00000153527	24.8709	709	20.3235	561	21.5191	529	18.1138	623	12.9939	271	17.7692	515	17.0237	304
ENSMUSG00000032224	Fam81a	36.8465	38.3879	34.7914	1.18266	0.24203	0.0278534	0.658082	9	70088511	70142560	-1	protein_coding	family with sequence similarity 81, member A [Source:MGI Symbol;Acc:MGI:1924136]	ENSMUST00000034749,ENSMUST00000123206,ENSMUST00000141775,ENSMUST00000145427	29.9574	854	43.9436	1213	41.3296	1016	38.3209	1318	34.906	728	34.4687	999	34.9993	625
ENSMUSG00000010175	Prox1	58.329	60.4193	55.542	1.14737	0.198325	0.0279082	0.658082	1	190118035	190170714	-1	protein_coding	prospero homeobox 1 [Source:MGI Symbol;Acc:MGI:97772]	ENSMUST00000010319,ENSMUST00000175916,ENSMUST00000177288	50.4083	1437	66.5131	1836	62.3605	1533	62.3951	2146	54.9002	1145	55.4467	1607	56.2789	1005
ENSMUSG00000022723	Crybg3	103.858	108.453	97.7314	1.13837	0.186969	0.0279189	0.658082	16	59490775	59600979	-1	protein_coding	beta-gamma crystallin domain containing 3 [Source:MGI Symbol;Acc:MGI:2676311]	ENSMUST00000044604,ENSMUST00000129350,ENSMUST00000129762,ENSMUST00000139989,ENSMUST00000172910,ENSMUST00000232544	99.8696	2847	105.312	2907	112.477	2765	116.155	3995	94.3613	1968	100.163	2903	98.6701	1762
ENSMUSG00000113795	Gm48119	1.73938	2.02995	1.35195	1.65759	0.729084	0.0280398	0.659875	12	116850478	116853102	-1	processed_pseudogene	predicted gene, 48119 [Source:MGI Symbol;Acc:MGI:6097475]	ENSMUST00000220994	1.40315	40	2.10118	58	2.52208	62	2.0934	72	1.15075	24	1.44914	42	1.45597	26
ENSMUSG00000038763	Alpk3	163.477	170.254	154.442	1.15383	0.206433	0.0281273	0.660881	7	81057600	81105612	1	protein_coding	alpha-kinase 3 [Source:MGI Symbol;Acc:MGI:2151224]	ENSMUST00000107348,ENSMUST00000151115	147.121	4194	182.984	5051	180.939	4448	169.973	5846	167.05	3484	152.021	4406	144.253	2576
ENSMUSG00000004885	Crabp2	6.97542	7.76127	5.92763	1.34584	0.428504	0.0288647	0.677126	3	87948666	87953376	1	protein_coding	cellular retinoic acid binding protein II [Source:MGI Symbol;Acc:MGI:88491]	ENSMUST00000005019,ENSMUST00000163040	7.08593	202	7.42657	205	8.21711	202	8.31546	286	6.04142	126	6.14157	178	5.59989	100
ENSMUSG00000109206	Gm45137	1.55382	1.16319	2.07466	-1.68963	-0.756706	0.0290045	0.679324	7	121039138	121043552	1	TEC	predicted gene 45137 [Source:MGI Symbol;Acc:MGI:5753713]	ENSMUST00000208652	0.94713	27	1.15927	32	0.97629	24	1.57005	54	1.96586	41	1.79417	52	2.46395	44
ENSMUSG00000018923	Med11	16.1486	14.6185	18.1888	-1.24984	-0.321739	0.0291716	0.679668	11	70451919	70453727	1	protein_coding	mediator complex subunit 11 [Source:MGI Symbol;Acc:MGI:1913422]	ENSMUST00000019067,ENSMUST00000151013,ENSMUST00000152348	14.8734	424	14.5996	403	15.5393	382	13.4617	463	19.6586	410	16.5961	481	18.3117	327
ENSMUSG00000023911	Flywch2	3.26032	2.77877	3.90239	-1.50284	-0.587689	0.0291813	0.679668	17	23776916	23786081	-1	protein_coding	FLYWCH family member 2 [Source:MGI Symbol;Acc:MGI:1924167]	ENSMUST00000024704,ENSMUST00000122991,ENSMUST00000127144	3.33249	95	2.46345	68	2.44073	60	2.87843	99	4.26736	89	3.96787	115	3.47193	62
ENSMUSG00000045466	Zfp956	5.17109	4.42751	6.16253	-1.39076	-0.47587	0.0292267	0.679668	6	47953390	47965300	1	protein_coding	zinc finger protein 956 [Source:MGI Symbol;Acc:MGI:2141515]	ENSMUST00000101445,ENSMUST00000140719,ENSMUST00000174790	4.38486	125	4.09367	113	4.23059	104	5.00091	172	6.28116	131	5.93455	172	6.27188	112
ENSMUSG00000020067	Mypn	3.44695	2.35081	4.90848	-1.70814	-0.772429	0.0292318	0.679668	10	63115795	63203952	-1	protein_coding	myopalladin [Source:MGI Symbol;Acc:MGI:1916052]	ENSMUST00000095580,ENSMUST00000218978	1.1576	33	3.65895	101	2.1153	52	2.47138	85	3.40429	71	7.62521	221	3.69593	66
ENSMUSG00000001763	Tspan33	7.74444	8.3149	6.98384	1.35113	0.434162	0.0292499	0.679668	6	29694222	29718559	1	protein_coding	tetraspanin 33 [Source:MGI Symbol;Acc:MGI:1919012]	ENSMUST00000046750,ENSMUST00000115250,ENSMUST00000137925	5.15659	147	7.53526	208	8.90865	219	11.6591	401	6.71269	140	5.27899	153	8.95983	160
ENSMUSG00000031367	Ap1s2	30.0926	32.5386	26.8311	1.21159	0.276905	0.0293646	0.68043	X	163909017	163933666	1	protein_coding	adaptor-related protein complex 1, sigma 2 subunit [Source:MGI Symbol;Acc:MGI:1889383]	ENSMUST00000033734,ENSMUST00000069041,ENSMUST00000112294,ENSMUST00000140845	32.6234	930	35.5751	982	31.282	769	30.6742	1055	24.4054	509	26.9125	780	29.1755	521
ENSMUSG00000051920	Rspo2	1.60897	1.95778	1.14387	1.71729	0.780136	0.029435	0.68043	15	43020794	43170826	-1	protein_coding	R-spondin 2 [Source:MGI Symbol;Acc:MGI:1922667]	ENSMUST00000063492,ENSMUST00000226402,ENSMUST00000226810	1.89426	54	2.06495	57	1.3424	33	2.52953	87	0.863061	18	1.00059	29	1.56797	28
ENSMUSG00000113261	Gm47404	0.797945	0.929745	0.622212	1.95568	0.96767	0.029445	0.68043	13	10175784	10180807	-1	lncRNA	predicted gene, 47404 [Source:MGI Symbol;Acc:MGI:6096334]	ENSMUST00000222625	0.175394	5	1.34041	37	1.09833	27	1.10485	38	0.815113	17	0.379535	11	0.671987	12
ENSMUSG00000001014	Icam4	1.298	1.50946	1.01604	1.7481	0.805787	0.0294674	0.68043	9	21029373	21030595	1	protein_coding	intercellular adhesion molecule 4, Landsteiner-Wiener blood group [Source:MGI Symbol;Acc:MGI:1925619]	ENSMUST00000001040,ENSMUST00000215077	0.771735	22	1.70268	47	1.78987	44	1.77358	61	0.863061	18	0.897084	26	1.28798	23
ENSMUSG00000032714	Syde1	78.7451	74.718	84.1147	-1.13866	-0.187342	0.0299196	0.689726	10	78584503	78591964	-1	protein_coding	synapse defective 1, Rho GTPase, homolog 1 (C. elegans) [Source:MGI Symbol;Acc:MGI:1918959]	ENSMUST00000040580	77.2788	2203	72.0921	1990	76.232	1874	73.2691	2520	86.5458	1805	82.8077	2400	82.9904	1482
ENSMUSG00000090935	Synj2bp	41.1613	43.7609	37.6951	1.17347	0.230775	0.0299636	0.689726	12	81497941	81532911	-1	protein_coding	synaptojanin 2 binding protein [Source:MGI Symbol;Acc:MGI:1344347]	ENSMUST00000019829,ENSMUST00000114201,ENSMUST00000163402,ENSMUST00000164431,ENSMUST00000169158	42.7261	1218	44.3421	1224	44.6246	1097	43.3509	1491	33.8512	706	42.1629	1222	37.0713	662
ENSMUSG00000060961	Slc4a4	34.1686	36.558	30.9828	1.18855	0.249202	0.0301972	0.692013	5	88886486	89239653	1	protein_coding	solute carrier family 4 (anion exchanger), member 4 [Source:MGI Symbol;Acc:MGI:1927555]	ENSMUST00000113216,ENSMUST00000113218,ENSMUST00000130041,ENSMUST00000134303,ENSMUST00000135283,ENSMUST00000144713,ENSMUST00000148750,ENSMUST00000156238,ENSMUST00000238265,ENSMUST00000239214	35.5349	1013	33.329	920	36.8956	907	40.4725	1392	31.5976	659	29.4313	853	31.9194	570
ENSMUSG00000028776	Tinagl1	79.2508	84.197	72.6558	1.18844	0.249067	0.0302	0.692013	4	130164454	130175122	-1	protein_coding	tubulointerstitial nephritis antigen-like 1 [Source:MGI Symbol;Acc:MGI:2137617]	ENSMUST00000030560,ENSMUST00000105998,ENSMUST00000105999,ENSMUST00000132545,ENSMUST00000133660,ENSMUST00000145000,ENSMUST00000145774,ENSMUST00000175822,ENSMUST00000175992	79.3835	2263	82.7067	2283	93.7239	2304	80.974	2785	84.5799	1764	61.4847	1782	71.9026	1284
ENSMUSG00000035513	Ntng2	1.86715	2.22319	1.39243	1.65901	0.73032	0.0302039	0.692013	2	29194541	29253005	-1	protein_coding	netrin G2 [Source:MGI Symbol;Acc:MGI:2159341]	ENSMUST00000048455,ENSMUST00000071201,ENSMUST00000091153,ENSMUST00000102873,ENSMUST00000125765,ENSMUST00000143194,ENSMUST00000147274,ENSMUST00000147897,ENSMUST00000149096,ENSMUST00000177689,ENSMUST00000183583	2.03457	58	1.9925	55	2.27801	56	2.58768	89	1.63023	34	1.0351	30	1.51197	27
ENSMUSG00000022297	Fzd6	25.147	27.3583	22.1986	1.18916	0.249939	0.0303333	0.693371	15	39006034	39038188	1	protein_coding	frizzled class receptor 6 [Source:MGI Symbol;Acc:MGI:108474]	ENSMUST00000022906,ENSMUST00000179165,ENSMUST00000227606,ENSMUST00000228491,ENSMUST00000228922	30.2731	863	25.6851	709	26.3192	647	27.1561	934	21.5286	449	21.7715	631	23.2956	416
ENSMUSG00000110896	Gm48273	2.83102	2.48805	3.28832	-1.51748	-0.601679	0.0303962	0.693371	10	50333764	50334749	-1	TEC	predicted gene, 48273 [Source:MGI Symbol;Acc:MGI:6097698]	ENSMUST00000217629	3.47281	99	1.81136	50	2.19665	54	2.47138	85	2.58918	54	3.69185	107	3.58393	64
ENSMUSG00000028435	Aqp3	1.22103	1.41321	0.964788	1.82154	0.865159	0.0304646	0.693371	4	41092722	41098183	-1	protein_coding	aquaporin 3 [Source:MGI Symbol;Acc:MGI:1333777]	ENSMUST00000055327,ENSMUST00000154722	0.63142	18	1.37663	38	1.87122	46	1.77358	61	0.623322	13	0.759071	22	1.51197	27
ENSMUSG00000071660	Ttc9c	46.1901	48.5376	43.0602	1.16543	0.220862	0.0304875	0.693371	19	8809075	8819333	-1	protein_coding	tetratricopeptide repeat domain 9C [Source:MGI Symbol;Acc:MGI:1917637]	ENSMUST00000088092,ENSMUST00000096751,ENSMUST00000148090,ENSMUST00000153281	43.4978	1240	49.4501	1365	48.0823	1182	53.1201	1827	41.7146	870	45.5788	1321	41.8872	748
ENSMUSG00000081094	Rpl19-ps11	4.10682	6.58494	0.802652	66.3391	6.05179	0.0305138	0.693371	8	19492936	19493526	1	processed_pseudogene	ribosomal protein L19, pseudogene 11 [Source:MGI Symbol;Acc:MGI:3642193]	ENSMUST00000122422	0	0	25.3228	699	1.01697	25	0	0	0	0	0	0	2.40795	43
ENSMUSG00000041132	N4bp2l1	2.57776	2.92874	2.10978	1.55452	0.636473	0.0305456	0.693371	5	150571644	150597188	-1	protein_coding	NEDD4 binding protein 2-like 1 [Source:MGI Symbol;Acc:MGI:2140872]	ENSMUST00000016279,ENSMUST00000200840,ENSMUST00000200926,ENSMUST00000201319,ENSMUST00000202031,ENSMUST00000202279,ENSMUST00000202291	1.78902	51	3.98499	110	3.09159	76	2.84936	98	2.1097	44	2.03569	59	2.18396	39
ENSMUSG00000090257	Gm4524	0.958615	0.620621	1.40927	-2.1086	-1.07629	0.0306053	0.693658	16	25956475	25960342	1	lncRNA	predicted gene 4524 [Source:MGI Symbol;Acc:MGI:3782709]	ENSMUST00000161614	0.385868	11	0.579635	16	1.13901	28	0.377976	13	1.15075	24	1.17311	34	1.90396	34
ENSMUSG00000040732	Erg	23.7671	25.517	21.4339	1.20935	0.274233	0.0307026	0.694793	16	95359169	95586593	-1	protein_coding	ETS transcription factor [Source:MGI Symbol;Acc:MGI:95415]	ENSMUST00000113848,ENSMUST00000121809,ENSMUST00000122199,ENSMUST00000171646,ENSMUST00000176345,ENSMUST00000233269,ENSMUST00000233664,ENSMUST00000233881	24.1693	689	23.0405	636	28.109	691	26.749	920	21.1929	442	23.1172	670	19.9916	357
ENSMUSG00000006717	Acot13	23.9578	21.6024	27.0984	-1.21507	-0.281035	0.0307595	0.695015	13	24817948	24831540	-1	protein_coding	acyl-CoA thioesterase 13 [Source:MGI Symbol;Acc:MGI:1914084]	ENSMUST00000006900,ENSMUST00000224839	19.3285	551	24.5983	679	20.2987	499	22.1843	763	26.1316	545	28.3962	823	26.7675	478
ENSMUSG00000053702	Nebl	352.588	369.737	329.722	1.17417	0.231645	0.0308435	0.695845	2	17343909	17731464	-1	protein_coding	nebulette [Source:MGI Symbol;Acc:MGI:1921353]	ENSMUST00000028080,ENSMUST00000124270,ENSMUST00000124611,ENSMUST00000127912,ENSMUST00000130725,ENSMUST00000131957,ENSMUST00000132418,ENSMUST00000137253,ENSMUST00000138241,ENSMUST00000145492,ENSMUST00000145545,ENSMUST00000150194,ENSMUST00000177966	318.586	9082	400.274	11049	384.089	9442	375.999	12932	315.353	6577	354.003	10260	319.81	5711
ENSMUSG00000063652	Slc22a21	3.52511	3.05726	4.14891	-1.54702	-0.629496	0.0311001	0.699562	11	53949965	53980332	-1	protein_coding	solute carrier family 22 (organic cation transporter), member 21 [Source:MGI Symbol;Acc:MGI:1929481]	ENSMUST00000076493,ENSMUST00000124221,ENSMUST00000129301,ENSMUST00000143352	3.92883	112	3.7314	103	2.76616	68	1.80265	62	4.17146	87	3.79535	110	4.47992	80
ENSMUSG00000025597	Klhl4	18.5587	13.8514	24.8351	-1.53779	-0.620861	0.0311033	0.699562	X	114474333	114560829	1	protein_coding	kelch-like 4 [Source:MGI Symbol;Acc:MGI:2442829]	ENSMUST00000040504,ENSMUST00000113371,ENSMUST00000133447	12.9441	369	15.0343	415	12.3663	304	15.0609	518	14.5761	304	43.5776	1263	16.3517	292
ENSMUSG00000021703	Serinc5	41.8545	44.3252	38.5603	1.16148	0.215963	0.031191	0.699919	13	92611091	92711947	1	protein_coding	serine incorporator 5 [Source:MGI Symbol;Acc:MGI:2444223]	ENSMUST00000049488,ENSMUST00000224250,ENSMUST00000224458	42.9716	1225	43.8711	1211	45.4788	1118	44.9791	1547	37.4952	782	40.6103	1177	37.5753	671
ENSMUSG00000021702	Thbs4	26.8523	20.967	34.6994	-1.44319	-0.529262	0.0312345	0.699919	13	92751590	92794818	-1	protein_coding	thrombospondin 4 [Source:MGI Symbol;Acc:MGI:1101779]	ENSMUST00000022213,ENSMUST00000168299	16.3818	467	25.1417	694	18.3868	452	23.9578	824	21.9122	457	53.5145	1551	28.6715	512
ENSMUSG00000021219	Rgs6	17.2214	18.3716	15.6877	1.22704	0.295188	0.0312617	0.699919	12	82588292	83162056	1	protein_coding	regulator of G-protein signaling 6 [Source:MGI Symbol;Acc:MGI:1354730]	ENSMUST00000101234,ENSMUST00000161801,ENSMUST00000185665,ENSMUST00000185674,ENSMUST00000186081,ENSMUST00000186309,ENSMUST00000186323,ENSMUST00000186458,ENSMUST00000186848,ENSMUST00000190964,ENSMUST00000191107,ENSMUST00000191311,ENSMUST00000191352,ENSMUST00000193448,ENSMUST00000200861,ENSMUST00000200911,ENSMUST00000201271,ENSMUST00000201512,ENSMUST00000201602,ENSMUST00000201767,ENSMUST00000201861,…	15.7153	448	19.5265	539	18.7936	462	19.4512	669	15.7269	328	16.2165	470	15.1197	270
ENSMUSG00000056025	Clca3a1	28.3074	26.0033	31.3796	-1.26679	-0.341175	0.0314348	0.702728	3	144729677	144760977	-1	protein_coding	chloride channel accessory 3A1 [Source:MGI Symbol;Acc:MGI:1316732]	ENSMUST00000029932,ENSMUST00000059091	29.2558	834	26.4821	731	19.6072	482	28.668	986	28.0974	586	36.1939	1049	29.8474	533
ENSMUSG00000028967	Errfi1	55.686	53.5691	58.5086	-1.20753	-0.272058	0.0317467	0.706899	4	150853919	150868892	1	protein_coding	ERBB receptor feedback inhibitor 1 [Source:MGI Symbol;Acc:MGI:1921405]	ENSMUST00000030811,ENSMUST00000073600,ENSMUST00000128640	68.053	1940	40.3571	1114	56.5842	1391	49.2822	1695	64.1542	1338	54.7566	1587	56.6149	1011
ENSMUSG00000054871	Tmem158	4.63137	5.62748	3.30322	1.48961	0.574936	0.0317608	0.706899	9	123259053	123260764	-1	protein_coding	transmembrane protein 158 [Source:MGI Symbol;Acc:MGI:1919559]	ENSMUST00000068140	7.78751	222	3.69517	102	5.9391	146	5.08813	175	3.2125	67	2.55324	74	4.14392	74
ENSMUSG00000001504	Irx2	4.28671	3.59932	5.20323	-1.65488	-0.72673	0.0318021	0.706899	13	72628820	72634198	1	protein_coding	Iroquois homeobox 2 [Source:MGI Symbol;Acc:MGI:1197526]	ENSMUST00000074372,ENSMUST00000163393,ENSMUST00000167067,ENSMUST00000169028,ENSMUST00000172353	5.6477	161	3.29667	91	2.40005	59	3.05288	105	2.73303	57	8.00475	232	4.87191	87
ENSMUSG00000001029	Icam2	27.8258	25.6599	30.7136	-1.18457	-0.244362	0.0318133	0.706899	11	106377656	106388075	-1	protein_coding	intercellular adhesion molecule 2 [Source:MGI Symbol;Acc:MGI:96394]	ENSMUST00000001055,ENSMUST00000106809,ENSMUST00000106813,ENSMUST00000141146,ENSMUST00000173795	24.7657	706	26.0111	718	28.7192	706	23.1437	796	29.1523	608	33.8132	980	29.1755	521
ENSMUSG00000022817	Itgb5	164.862	154.162	179.128	-1.18822	-0.248804	0.0318736	0.706923	16	33829665	33949338	1	protein_coding	integrin beta 5 [Source:MGI Symbol;Acc:MGI:96614]	ENSMUST00000069345,ENSMUST00000115028,ENSMUST00000134262,ENSMUST00000148462,ENSMUST00000151930,ENSMUST00000231409,ENSMUST00000232262	162.591	4635	128.643	3551	159.542	3922	165.873	5705	192.463	4014	167.237	4847	177.685	3173
ENSMUSG00000018654	Ikzf1	4.34365	4.89364	3.61033	1.42119	0.507098	0.0319554	0.706923	11	11685003	11772926	1	protein_coding	IKAROS family zinc finger 1 [Source:MGI Symbol;Acc:MGI:1342540]	ENSMUST00000018798,ENSMUST00000048122,ENSMUST00000065433,ENSMUST00000076700,ENSMUST00000126058,ENSMUST00000141436	4.13931	118	5.65144	156	4.43398	109	5.34981	184	3.45224	72	3.34681	97	4.03192	72
ENSMUSG00000001227	Sema6b	1.69241	1.20348	2.34433	-1.75062	-0.807865	0.0319584	0.706923	17	56123085	56140343	-1	protein_coding	sema domain, transmembrane domain (TM), and cytoplasmic domain, (semaphorin) 6B [Source:MGI Symbol;Acc:MGI:1202889]	ENSMUST00000001256,ENSMUST00000167545	0.912051	26	1.12304	31	1.17968	29	1.59913	55	3.35635	70	1.82867	53	1.84797	33
ENSMUSG00000002881	Nab1	73.0892	76.5834	68.4303	1.14165	0.191122	0.032263	0.709745	1	52457294	52500679	-1	protein_coding	Ngfi-A binding protein 1 [Source:MGI Symbol;Acc:MGI:107564]	ENSMUST00000069792,ENSMUST00000167732,ENSMUST00000168082,ENSMUST00000170269,ENSMUST00000186764	71.8065	2047	82.3444	2273	75.1337	1847	77.0489	2650	66.12	1379	70.6281	2047	68.5427	1224
ENSMUSG00000100510	Hand2os1	102.331	107.494	95.446	1.13488	0.182545	0.0322772	0.709745	8	57281117	57324233	-1	lncRNA	Hand2, opposite strand 1 [Source:MGI Symbol;Acc:MGI:5578769]	ENSMUST00000185635,ENSMUST00000185793,ENSMUST00000185946,ENSMUST00000186214,ENSMUST00000186386,ENSMUST00000187461,ENSMUST00000187718,ENSMUST00000189098,ENSMUST00000189143,ENSMUST00000189169,ENSMUST00000211191,ENSMUST00000223626,ENSMUST00000223675,ENSMUST00000223799,ENSMUST00000223828,ENSMUST00000223874,ENSMUST00000223961,ENSMUST00000223980,ENSMUST00000224148,ENSMUST00000224153,ENSMUST00000224335,…	104.921	2991	111.797	3086	108.734	2673	104.525	3595	95.0326	1982	94.9874	2753	96.3182	1720
ENSMUSG00000104218	Gm9134	0.742021	0.461897	1.11552	-9.55112	-3.25567	0.0323244	0.709745	12	113381011	113381561	-1	processed_pseudogene	predicted gene 9134 [Source:MGI Symbol;Acc:MGI:3645181]	ENSMUST00000193186	0	0	1.84759	51	0	0	0	0	1.77407	37	0.172516	5	1.39997	25
ENSMUSG00000038702	Dsel	25.4842	24.2656	27.1091	-1.19191	-0.253278	0.032369	0.709745	1	111858702	111864918	-1	protein_coding	dermatan sulfate epimerase-like [Source:MGI Symbol;Acc:MGI:2442948]	ENSMUST00000035462,ENSMUST00000186365,ENSMUST00000189370,ENSMUST00000189731	28.5893	815	19.6714	543	23.7971	585	25.0045	860	25.5562	533	28.4997	826	27.2715	487
ENSMUSG00000041237	Pklr	4.1593	4.64123	3.51672	1.74556	0.803689	0.0323697	0.709745	3	89136142	89146784	1	protein_coding	pyruvate kinase liver and red blood cell [Source:MGI Symbol;Acc:MGI:97604]	ENSMUST00000047111,ENSMUST00000107482,ENSMUST00000127058,ENSMUST00000148097,ENSMUST00000151591	2.66599	76	4.99935	138	5.49163	135	5.40796	186	3.97967	83	1.13861	33	5.4319	97
ENSMUSG00000073002	Vamp5	11.462	10.0915	13.2894	-1.28249	-0.358943	0.0323786	0.709745	6	72368794	72380468	-1	protein_coding	vesicle-associated membrane protein 5 [Source:MGI Symbol;Acc:MGI:1858622]	ENSMUST00000074231,ENSMUST00000101285,ENSMUST00000206154	9.19066	262	11.3753	314	9.27476	228	10.5252	362	12.6103	263	13.5943	394	13.6637	244
ENSMUSG00000042918	Mamstr	2.41897	2.80219	1.90802	1.56224	0.643617	0.0324232	0.709745	7	45639977	45646521	1	protein_coding	MEF2 activating motif and SAP domain containing transcriptional regulator [Source:MGI Symbol;Acc:MGI:1921740]	ENSMUST00000148532,ENSMUST00000210169,ENSMUST00000210213,ENSMUST00000210648,ENSMUST00000210957,ENSMUST00000210988	2.20997	63	2.49968	69	3.21362	79	3.28548	113	1.91791	40	2.07019	60	1.73597	31
ENSMUSG00000042608	Stk40	66.5771	63.0577	71.2697	-1.14172	-0.191204	0.0325069	0.710042	4	126103957	126141029	1	protein_coding	serine/threonine kinase 40 [Source:MGI Symbol;Acc:MGI:1921428]	ENSMUST00000094761,ENSMUST00000116286,ENSMUST00000127092,ENSMUST00000134369,ENSMUST00000139188,ENSMUST00000139524	64.8959	1850	58.4707	1614	66.4691	1634	62.3951	2146	71.7299	1496	74.7685	2167	67.3107	1202
ENSMUSG00000067242	Lgi1	0.953612	1.26366	0.54021	1.89277	0.920502	0.0326377	0.710042	19	38264536	38312214	1	protein_coding	leucine-rich repeat LGI family, member 1 [Source:MGI Symbol;Acc:MGI:1861691]	ENSMUST00000087252,ENSMUST00000130039,ENSMUST00000134832,ENSMUST00000196090,ENSMUST00000197123,ENSMUST00000198045,ENSMUST00000198518,ENSMUST00000199665,ENSMUST00000199812	1.9995	57	0.869453	24	1.13901	28	1.0467	36	0.383582	8	0.621058	18	0.615988	11
ENSMUSG00000072902	Gm10435	8.27478	7.10664	9.83231	-1.30989	-0.389444	0.0326564	0.710042	11	59002910	59007293	1	lncRNA	predicted gene 10435 [Source:MGI Symbol;Acc:MGI:3642820]	ENSMUST00000101162,ENSMUST00000162526	5.92833	169	6.91939	191	8.33915	205	7.23969	249	8.63061	180	10.7305	311	10.1358	181
ENSMUSG00000045348	Nyap1	15.6877	14.3035	17.5334	-1.23707	-0.306922	0.0326793	0.710042	5	137729899	137741607	-1	protein_coding	neuronal tyrosine-phosphorylated phosphoinositide 3-kinase adaptor 1 [Source:MGI Symbol;Acc:MGI:2443880]	ENSMUST00000061789,ENSMUST00000118326,ENSMUST00000149512,ENSMUST00000212152	14.698	419	13.875	383	15.0918	371	13.549	466	18.364	383	17.0446	494	17.1917	307
ENSMUSG00000052353	Cemip	21.694	22.7529	20.2822	1.23625	0.305969	0.0327326	0.710042	7	83932857	84086502	-1	protein_coding	cell migration inducing protein, hyaluronan binding [Source:MGI Symbol;Acc:MGI:2443629]	ENSMUST00000064174,ENSMUST00000142518,ENSMUST00000145171,ENSMUST00000147578,ENSMUST00000150495	15.0839	430	27.6413	763	20.4614	503	27.8248	957	19.2271	401	20.5639	596	21.0556	376
ENSMUSG00000014905	Dnajb9	35.8495	38.7125	32.0322	1.17585	0.233706	0.0327532	0.710042	12	44205559	44210326	-1	protein_coding	DnaJ heat shock protein family (Hsp40) member B9 [Source:MGI Symbol;Acc:MGI:1351618]	ENSMUST00000015049,ENSMUST00000220421	41.814	1192	33.7275	931	39.6211	974	39.6874	1365	28.9125	603	33.6406	975	33.5434	599
ENSMUSG00000030303	Far2	1.15433	0.865904	1.53891	-1.81496	-0.859935	0.0327741	0.710042	6	148047259	148182758	1	protein_coding	fatty acyl CoA reductase 2 [Source:MGI Symbol;Acc:MGI:2687035]	ENSMUST00000032443,ENSMUST00000111607,ENSMUST00000203278	0.982208	28	0.760771	21	0.935611	23	0.785026	27	1.24664	26	1.24212	36	2.12796	38
ENSMUSG00000051255	Gm6563	4.32836	2.73167	6.45727	-2.97218	-1.57152	0.0328558	0.710765	19	23675848	23676480	1	processed_pseudogene	predicted pseudogene 6563 [Source:MGI Symbol;Acc:MGI:3646907]	ENSMUST00000056396	1.68379	48	7.96998	220	0.894933	22	0.377976	13	6.08937	127	1.69066	49	11.5918	207
ENSMUSG00000025241	Fyco1	85.7478	89.8781	80.2407	1.13837	0.186968	0.0331008	0.714397	9	123789500	123851899	-1	protein_coding	FYVE and coiled-coil domain containing 1 [Source:MGI Symbol;Acc:MGI:107277]	ENSMUST00000084715,ENSMUST00000167595,ENSMUST00000183700,ENSMUST00000184082,ENSMUST00000216136	85.5223	2438	93.3575	2577	88.4356	2174	92.197	3171	79.018	1648	84.7054	2455	76.9986	1375
ENSMUSG00000046093	Hpcal4	10.3848	12.5778	7.46076	1.32216	0.402893	0.0331618	0.714397	4	123183227	123194701	1	protein_coding	hippocalcin-like 4 [Source:MGI Symbol;Acc:MGI:2157521]	ENSMUST00000059667,ENSMUST00000106246,ENSMUST00000126995,ENSMUST00000136619,ENSMUST00000152194	20.451	583	7.31789	202	12.5697	309	9.97274	343	6.18527	129	7.34919	213	8.84783	158
ENSMUSG00000028266	Lmo4	87.2832	82.4446	93.7346	-1.14305	-0.192888	0.0332293	0.714397	3	144188530	144205220	-1	protein_coding	LIM domain only 4 [Source:MGI Symbol;Acc:MGI:109360]	ENSMUST00000120539,ENSMUST00000121112,ENSMUST00000121796,ENSMUST00000124891,ENSMUST00000134961,ENSMUST00000148128,ENSMUST00000196264,ENSMUST00000197652	84.3647	2405	82.3806	2274	84.3271	2073	78.7062	2707	102.944	2147	86.0855	2495	92.1743	1646
ENSMUSG00000093954	Gm16867	1.20969	0.696413	1.89406	-3.05746	-1.61233	0.0332367	0.714397	14	69363504	69503362	-1	protein_coding	predicted gene, 16867 [Source:MGI Symbol;Acc:MGI:4439791]	ENSMUST00000179116,ENSMUST00000180059,ENSMUST00000183695,ENSMUST00000183840,ENSMUST00000183917,ENSMUST00000184039,ENSMUST00000184816	0.245552	7	1.23172	34	0	0	1.30838	45	3.16456	66	1.62165	47	0.895983	16
ENSMUSG00000026748	Plxdc2	43.8162	47.0491	39.5057	1.18971	0.250607	0.0333164	0.714397	2	16356304	16755839	1	protein_coding	plexin domain containing 2 [Source:MGI Symbol;Acc:MGI:1914698]	ENSMUST00000028081,ENSMUST00000114702,ENSMUST00000114703,ENSMUST00000126173	47.7774	1362	50.5007	1394	43.689	1074	46.2293	1590	34.6183	722	38.0916	1104	45.8071	818
ENSMUSG00000037493	Cib2	3.51037	2.91965	4.29799	-1.48071	-0.566288	0.0333224	0.714397	9	54544794	54560218	-1	protein_coding	calcium and integrin binding family member 2 [Source:MGI Symbol;Acc:MGI:1929293]	ENSMUST00000041901	3.12202	89	3.11554	86	2.76616	68	2.6749	92	5.27426	110	3.13979	91	4.47992	80
ENSMUSG00000028834	Trim63	54.9139	55.9205	53.5717	1.15065	0.20245	0.0333631	0.714397	4	134315120	134329629	1	protein_coding	tripartite motif-containing 63 [Source:MGI Symbol;Acc:MGI:2447992]	ENSMUST00000030638,ENSMUST00000105875,ENSMUST00000134164,ENSMUST00000135576	39.0779	1114	63.3251	1748	60.9775	1499	60.3017	2074	56.5784	1180	49.2016	1426	54.935	981
ENSMUSG00000028894	Inpp5b	25.502	24.174	27.2728	-1.18555	-0.245557	0.0335831	0.716658	4	124741850	124801511	1	protein_coding	inositol polyphosphate-5-phosphatase B [Source:MGI Symbol;Acc:MGI:103257]	ENSMUST00000094782,ENSMUST00000135971,ENSMUST00000142446,ENSMUST00000142652,ENSMUST00000145359,ENSMUST00000153837,ENSMUST00000154229,ENSMUST00000184454	27.7474	791	22.7869	629	23.5123	578	22.6495	779	26.1795	546	29.4313	853	26.2075	468
ENSMUSG00000073802	Cdkn2b	3.71421	3.09938	4.53397	-1.50759	-0.592245	0.0336594	0.716658	4	89306299	89311039	-1	protein_coding	cyclin dependent kinase inhibitor 2B [Source:MGI Symbol;Acc:MGI:104737]	ENSMUST00000097981	3.26234	93	2.42722	67	3.94584	97	2.76213	95	4.93862	103	4.07138	118	4.59191	82
ENSMUSG00000118462		1.1197	1.36916	0.787088	1.79486	0.84387	0.0336742	0.716658	7	45418353	45421854	1	protein_coding	luteinizing hormone beta [Source:NCBI gene;Acc:16866]	ENSMUST00000238437,ENSMUST00000238581,ENSMUST00000238591,ENSMUST00000238638	1.26284	36	1.23172	34	1.58647	39	1.3956	48	0.719217	15	0.690065	20	0.951982	17
ENSMUSG00000031021	Tmem9b	24.7169	22.5955	27.5455	-1.19824	-0.260916	0.0337353	0.716658	7	109735834	109752875	-1	protein_coding	TMEM9 domain family, member B [Source:MGI Symbol;Acc:MGI:1915254]	ENSMUST00000033333,ENSMUST00000118571,ENSMUST00000128043	21.1526	603	25.6126	707	20.2987	499	23.3182	802	28.5289	595	27.8441	807	26.2635	469
ENSMUSG00000050592	Fam78a	148.264	153.617	141.126	1.16691	0.222688	0.0339383	0.716658	2	32050055	32084857	-1	protein_coding	family with sequence similarity 78, member A [Source:MGI Symbol;Acc:MGI:2443569]	ENSMUST00000056406,ENSMUST00000130178,ENSMUST00000139629,ENSMUST00000143795	122.32	3487	162.334	4481	171.705	4221	158.11	5438	157.269	3280	124.936	3621	141.173	2521
ENSMUSG00000019990	Pde7b	15.914	14.1879	18.2155	-1.29879	-0.377167	0.0340084	0.716658	10	20398004	20725078	-1	protein_coding	phosphodiesterase 7B [Source:MGI Symbol;Acc:MGI:1352752]	ENSMUST00000020165,ENSMUST00000164195,ENSMUST00000166147,ENSMUST00000169016,ENSMUST00000169404,ENSMUST00000170265,ENSMUST00000170683,ENSMUST00000217240	14.2771	407	12.8607	355	12.0816	297	17.5323	603	18.412	384	20.2189	586	16.0157	286
ENSMUSG00000039899	Fgl2	20.6696	22.3875	18.379	1.30009	0.378609	0.0340355	0.716658	5	21372642	21378374	1	protein_coding	fibrinogen-like protein 2 [Source:MGI Symbol;Acc:MGI:103266]	ENSMUST00000035799	18.8023	536	25.7938	712	20.7055	509	24.2486	834	15.4392	322	23.7382	688	15.9597	285
ENSMUSG00000027985	Lef1	28.6411	30.38	26.3226	1.18398	0.24364	0.0340799	0.716658	3	131110471	131224356	1	protein_coding	lymphoid enhancer binding factor 1 [Source:MGI Symbol;Acc:MGI:96770]	ENSMUST00000029611,ENSMUST00000066849,ENSMUST00000098611,ENSMUST00000106341,ENSMUST00000132737,ENSMUST00000136147,ENSMUST00000198624,ENSMUST00000200166	28.1683	803	32.7132	903	27.7836	683	32.8548	1130	26.5631	554	23.1172	670	29.2874	523
ENSMUSG00000001998	Ap4e1	18.186	19.8155	16.0133	1.21795	0.284451	0.0341271	0.716658	2	127008717	127067909	1	protein_coding	adaptor-related protein complex AP-4, epsilon 1 [Source:MGI Symbol;Acc:MGI:1336993]	ENSMUST00000002063,ENSMUST00000110393,ENSMUST00000110394,ENSMUST00000129859,ENSMUST00000142740,ENSMUST00000149254,ENSMUST00000175663,ENSMUST00000177372	20.7667	592	19.454	537	19.2411	473	19.8001	681	16.7817	350	15.8025	458	15.4557	276
ENSMUSG00000024036	Slc37a1	2.53574	2.12146	3.08811	-1.54308	-0.625814	0.034159	0.716658	17	31286792	31350739	1	protein_coding	solute carrier family 37 (glycerol-3-phosphate transporter), member 1 [Source:MGI Symbol;Acc:MGI:2446181]	ENSMUST00000165149,ENSMUST00000171233,ENSMUST00000235220,ENSMUST00000235230,ENSMUST00000235261,ENSMUST00000235564,ENSMUST00000235972,ENSMUST00000236147,ENSMUST00000236251,ENSMUST00000236467,ENSMUST00000236710,ENSMUST00000237389,ENSMUST00000237425,ENSMUST00000237460,ENSMUST00000237835,ENSMUST00000237928,ENSMUST00000237932,ENSMUST00000237980	2.52568	72	1.92004	53	2.03394	50	2.00618	69	3.59609	75	3.03628	88	2.63195	47
ENSMUSG00000036745	Ttll7	13.6967	12.8385	14.8411	-1.24421	-0.315227	0.0341916	0.716658	3	146852367	146984009	1	protein_coding	tubulin tyrosine ligase-like family, member 7 [Source:MGI Symbol;Acc:MGI:1918142]	ENSMUST00000037942,ENSMUST00000038090,ENSMUST00000106134,ENSMUST00000124743,ENSMUST00000170055,ENSMUST00000197547	15.5399	443	10.9044	301	12.0002	295	12.9093	444	13.761	287	15.2504	442	15.5117	277
ENSMUSG00000007021	Syngr3	2.13936	1.75569	2.65093	-1.61573	-0.692189	0.034229	0.716658	17	24685092	24689955	-1	protein_coding	synaptogyrin 3 [Source:MGI Symbol;Acc:MGI:1341881]	ENSMUST00000007236,ENSMUST00000130936	2.10473	60	1.41286	39	1.99326	49	1.5119	52	3.11661	65	2.48423	72	2.35196	42
ENSMUSG00000030339	Ltbr	68.9926	65.15	74.1162	-1.14413	-0.194256	0.0342492	0.716658	6	125306571	125313885	-1	protein_coding	lymphotoxin B receptor [Source:MGI Symbol;Acc:MGI:104875]	ENSMUST00000032489,ENSMUST00000160901,ENSMUST00000161891	66.6148	1899	63.941	1765	67.242	1653	62.8021	2160	81.0318	1690	71.3182	2067	69.9987	1250
ENSMUSG00000095474	Cldn34c2	1.5682	1.90017	1.12556	1.69354	0.760038	0.0342732	0.716658	X	123576286	123602172	1	protein_coding	claudin 34C2 [Source:MGI Symbol;Acc:MGI:3644765]	ENSMUST00000178457,ENSMUST00000238499	1.89426	54	1.66645	46	2.23733	55	1.80265	62	1.29459	27	1.24212	36	0.839984	15
ENSMUSG00000087109	4930474H06Rik	1.82018	1.47519	2.28016	-1.79134	-0.841041	0.0342753	0.716658	12	71317621	71321660	-1	lncRNA	RIKEN cDNA 4930474H06 gene [Source:MGI Symbol;Acc:MGI:3697432]	ENSMUST00000132822	2.03457	58	0.796998	22	1.78987	44	1.2793	44	2.39739	50	1.58715	46	2.85595	51
ENSMUSG00000030528	Blm	42.3992	45.1465	38.7361	1.17266	0.229786	0.0342915	0.716658	7	80454733	80535119	-1	protein_coding	Bloom syndrome, RecQ like helicase [Source:MGI Symbol;Acc:MGI:1328362]	ENSMUST00000081314,ENSMUST00000170315,ENSMUST00000205263,ENSMUST00000205584,ENSMUST00000205713,ENSMUST00000205730,ENSMUST00000206518,ENSMUST00000206901,ENSMUST00000206948,ENSMUST00000206989	44.2695	1262	46.7693	1291	42.3873	1042	47.1597	1622	36.1047	753	41.5764	1205	38.5273	688
ENSMUSG00000045903	Npas4	7.43527	8.09202	6.55962	1.36515	0.449057	0.0342957	0.716658	19	4984355	4990316	-1	protein_coding	neuronal PAS domain protein 4 [Source:MGI Symbol;Acc:MGI:2664186]	ENSMUST00000056129,ENSMUST00000237172,ENSMUST00000237881	5.61262	160	9.63643	266	9.55951	235	7.55951	260	6.90448	144	5.3825	156	7.39186	132
ENSMUSG00000041144	Dnah7b	17.8231	16.3659	19.7661	-1.21974	-0.286578	0.0343828	0.717461	1	46066315	46373550	1	protein_coding	dynein, axonemal, heavy chain 7B [Source:MGI Symbol;Acc:MGI:2684953]	ENSMUST00000069293,ENSMUST00000185557,ENSMUST00000185879,ENSMUST00000187548,ENSMUST00000188209,ENSMUST00000190792,ENSMUST00000238212,ENSMUST00000238593	16.6274	474	16.1936	447	13.2206	325	19.4221	668	20.5696	429	16.6651	483	22.0636	394
ENSMUSG00000020451	Limk2	183.432	194.518	168.652	1.16113	0.215524	0.0344915	0.718149	11	3344256	3409189	-1	protein_coding	LIM motif-containing protein kinase 2 [Source:MGI Symbol;Acc:MGI:1197517]	ENSMUST00000101638,ENSMUST00000101640,ENSMUST00000101642,ENSMUST00000110029,ENSMUST00000123689,ENSMUST00000125832,ENSMUST00000132479,ENSMUST00000134576,ENSMUST00000142926,ENSMUST00000145223,ENSMUST00000147344,ENSMUST00000148091,ENSMUST00000148771	191.566	5461	195.409	5394	205.306	5047	185.79	6390	184.12	3840	155.575	4509	166.261	2969
ENSMUSG00000022894	Adamts5	21.3141	19.6568	23.5238	-1.23981	-0.310117	0.0345133	0.718149	16	85856173	85901828	-1	protein_coding	a disintegrin-like and metallopeptidase (reprolysin type) with thrombospondin type 1 motif, 5 (aggrecanase-2) [Source:MGI Symbol;Acc:MGI:1346321]	ENSMUST00000023611	21.5384	614	17.6789	488	15.7427	387	23.6671	814	18.6517	389	24.7043	716	27.2155	486
ENSMUSG00000054196	Cthrc1	95.7143	93.6839	98.4215	-1.1449	-0.195218	0.0346346	0.718369	15	39076932	39087121	1	protein_coding	collagen triple helix repeat containing 1 [Source:MGI Symbol;Acc:MGI:1915838]	ENSMUST00000067072,ENSMUST00000132192,ENSMUST00000144800,ENSMUST00000226433	116.251	3314	76.0046	2098	91.8526	2258	90.6269	3117	98.5807	2056	93.3657	2706	103.318	1845
ENSMUSG00000033186	Mzt1	77.1927	81.1763	71.8812	1.13316	0.180354	0.0346366	0.718369	14	99034544	99046134	-1	protein_coding	mitotic spindle organizing protein 1 [Source:MGI Symbol;Acc:MGI:1924039]	ENSMUST00000042662,ENSMUST00000227197,ENSMUST00000227948,ENSMUST00000228445	80.2955	2289	82.0184	2264	78.9168	1940	83.4745	2871	70.9628	1480	71.0421	2059	73.6386	1315
ENSMUSG00000090093	Gm14399	3.55939	4.17435	2.73945	1.50501	0.589773	0.0346701	0.718369	2	175129493	175142012	-1	protein_coding	predicted gene 14399 [Source:MGI Symbol;Acc:MGI:3650082]	ENSMUST00000099029,ENSMUST00000108929,ENSMUST00000109059,ENSMUST00000109060,ENSMUST00000109062	4.63041	132	3.87631	107	4.14923	102	4.04143	139	1.77407	37	3.58834	104	2.85595	51
ENSMUSG00000019792	Trmt11	11.7194	12.8786	10.1738	1.28613	0.363035	0.0348108	0.719565	10	30534225	30600749	-1	protein_coding	tRNA methyltransferase 11 [Source:MGI Symbol;Acc:MGI:1920931]	ENSMUST00000019927,ENSMUST00000215041,ENSMUST00000215595,ENSMUST00000216638,ENSMUST00000216705,ENSMUST00000216790	12.2776	350	14.3097	395	11.7562	289	13.171	453	9.01419	188	9.97143	289	11.5358	206
ENSMUSG00000058740	Kcnt1	1.8591	2.27461	1.30509	1.63538	0.709624	0.0348423	0.719565	2	25863734	25918273	1	protein_coding	potassium channel, subfamily T, member 1 [Source:MGI Symbol;Acc:MGI:1924627]	ENSMUST00000037580,ENSMUST00000114170,ENSMUST00000114172,ENSMUST00000114176,ENSMUST00000128502,ENSMUST00000131529,ENSMUST00000138568,ENSMUST00000145544,ENSMUST00000150788,ENSMUST00000153001,ENSMUST00000171268,ENSMUST00000197917,ENSMUST00000198204,ENSMUST00000199269,ENSMUST00000200434	2.77123	79	2.10118	58	2.27801	56	1.94803	67	1.67817	35	1.17311	34	1.06398	19
ENSMUSG00000041695	Kcnj2	33.2624	35.9287	29.7073	1.18008	0.238884	0.0348744	0.719565	11	111066164	111076821	1	protein_coding	potassium inwardly-rectifying channel, subfamily J, member 2 [Source:MGI Symbol;Acc:MGI:104744]	ENSMUST00000042970	38.5166	1098	32.7494	904	36.3668	894	36.0821	1241	29.7276	620	28.7067	832	30.6874	548
ENSMUSG00000021613	Hapln1	384.586	410.096	350.572	1.19307	0.254678	0.0350009	0.719927	13	89539796	89611652	1	protein_coding	hyaluronan and proteoglycan link protein 1 [Source:MGI Symbol;Acc:MGI:1337006]	ENSMUST00000022108,ENSMUST00000225678	391.41	11158	396.579	10947	438.192	10772	414.203	14246	352.416	7350	304.732	8832	394.569	7046
ENSMUSG00000034839	Larp6	2.26554	1.84156	2.83085	-1.56991	-0.65068	0.0350383	0.719927	9	60712989	60738801	1	protein_coding	La ribonucleoprotein domain family, member 6 [Source:MGI Symbol;Acc:MGI:1914807]	ENSMUST00000038407	1.89426	54	1.44909	40	1.66783	41	2.35508	81	2.44534	51	2.96728	86	3.07994	55
ENSMUSG00000048458	Inka2	11.0428	11.7712	10.0715	1.27104	0.34601	0.0350798	0.719927	3	105704599	105720842	1	protein_coding	inka box actin regulator 2 [Source:MGI Symbol;Acc:MGI:1923497]	ENSMUST00000066610,ENSMUST00000098273	8.69956	248	13.7663	380	11.7968	290	12.8221	441	10.117	211	9.17786	266	10.9198	195
ENSMUSG00000044966	Fbxo48	1.57646	1.88159	1.16962	1.66956	0.739472	0.0350921	0.719927	11	16951375	16954772	1	protein_coding	F-box protein 48 [Source:MGI Symbol;Acc:MGI:2442569]	ENSMUST00000061327,ENSMUST00000109635	1.71886	49	1.88381	52	2.23733	55	1.68635	58	1.15075	24	1.51814	44	0.839984	15
ENSMUSG00000069814	Ccdc92b	3.41993	3.76102	2.96514	1.51172	0.596186	0.0352021	0.719927	11	74619605	74641516	1	protein_coding	coiled-coil domain containing 92B [Source:MGI Symbol;Acc:MGI:3588240]	ENSMUST00000100866	2.17489	62	3.69517	102	3.21362	79	5.96039	205	1.58228	33	2.55324	74	4.75991	85
ENSMUSG00000031738	Irx6	1.92265	0.936839	3.23706	-2.26864	-1.18183	0.0352685	0.719927	8	92674288	92680956	1	protein_coding	Iroquois homeobox 6 [Source:MGI Symbol;Acc:MGI:1927642]	ENSMUST00000034185,ENSMUST00000167261	0.31571	9	0.978134	27	0.65086	16	1.80265	62	1.29459	27	6.62462	192	1.79197	32
ENSMUSG00000114763	Gm49354	0.97374	0.702951	1.33479	-2.01395	-1.01003	0.0353361	0.719927	13	59758935	59782245	-1	protein_coding	predicted gene, 49354 [Source:MGI Symbol;Acc:MGI:6121558]	ENSMUST00000225581	0.561262	16	0.181136	5	1.13901	28	0.930402	32	1.15075	24	1.62165	47	1.23198	22
ENSMUSG00000022797	Tfrc	166.382	175.968	153.602	1.15125	0.203196	0.035347	0.719927	16	32608920	32632794	1	protein_coding	transferrin receptor [Source:MGI Symbol;Acc:MGI:98822]	ENSMUST00000023486,ENSMUST00000120680,ENSMUST00000124243,ENSMUST00000128285,ENSMUST00000137901,ENSMUST00000155929,ENSMUST00000231912	173.816	4955	169.072	4667	183.014	4499	177.968	6121	149.885	3126	146.397	4243	164.525	2938
ENSMUSG00000033703	Fcsk	22.8447	21.3578	24.8273	-1.20322	-0.266904	0.0353686	0.719927	8	110882456	110902488	-1	protein_coding	fucose kinase [Source:MGI Symbol;Acc:MGI:1916071]	ENSMUST00000041382,ENSMUST00000212242,ENSMUST00000212568,ENSMUST00000212971	23.6432	674	20.3235	561	21.3157	524	20.149	693	27.0426	564	24.2558	703	23.1836	414
ENSMUSG00000050447	Lypd6	15.8651	16.9781	14.381	1.22653	0.294582	0.0353806	0.719927	2	50066429	50193569	1	protein_coding	LY6/PLAUR domain containing 6 [Source:MGI Symbol;Acc:MGI:2443848]	ENSMUST00000053208,ENSMUST00000112712,ENSMUST00000126337,ENSMUST00000128451,ENSMUST00000169232	14.9787	427	18.8744	521	16.5563	407	17.5032	602	15.2474	318	13.5598	393	14.3357	256
ENSMUSG00000024451	Arap3	84.1175	79.0586	90.8628	-1.14503	-0.195385	0.0356481	0.72432	18	37972628	37998969	-1	protein_coding	ArfGAP with RhoGAP domain, ankyrin repeat and PH domain 3 [Source:MGI Symbol;Acc:MGI:2147274]	ENSMUST00000042944,ENSMUST00000235391,ENSMUST00000236134,ENSMUST00000236534,ENSMUST00000236588,ENSMUST00000236772,ENSMUST00000237188,ENSMUST00000237272,ENSMUST00000237677	79.3484	2262	77.3813	2136	82.6592	2032	76.8454	2643	96.8546	2020	98.6792	2860	77.0546	1376
ENSMUSG00000085566	A730017L22Rik	6.29783	5.56862	7.27011	-1.36398	-0.447826	0.0356948	0.72432	2	130873059	130906396	-1	lncRNA	RIKEN cDNA A730017L22 gene [Source:MGI Symbol;Acc:MGI:3584452]	ENSMUST00000128176,ENSMUST00000133766,ENSMUST00000135110	6.24404	178	5.10803	141	6.18317	152	4.73923	163	7.04833	147	6.86614	199	7.89585	141
ENSMUSG00000041817	Fam169a	36.9045	38.9694	34.1513	1.20495	0.268975	0.0357587	0.724617	13	97067286	97131013	1	protein_coding	family with sequence similarity 169, member A [Source:MGI Symbol;Acc:MGI:2444268]	ENSMUST00000042517,ENSMUST00000169863	33.6757	960	42.4583	1172	41.0449	1009	38.6989	1331	37.2075	776	27.223	789	38.0233	679
ENSMUSG00000117351	Gm31615	1.09407	1.31788	0.795652	1.88721	0.916254	0.0358226	0.724917	17	88253483	88388699	-1	lncRNA	predicted gene, 31615 [Source:MGI Symbol;Acc:MGI:5590774]	ENSMUST00000234514	1.1576	33	1.52154	42	1.74919	43	0.843176	29	0.623322	13	1.48364	43	0.279995	5
ENSMUSG00000044921	Rassf9	2.81395	3.37721	2.06293	1.55463	0.636571	0.035909	0.725667	10	102512222	102549736	1	protein_coding	Ras association (RalGDS/AF-6) domain family (N-terminal) member 9 [Source:MGI Symbol;Acc:MGI:2384307]	ENSMUST00000055355,ENSMUST00000219445,ENSMUST00000220230	3.85868	110	2.97063	82	2.92887	72	3.75068	129	2.2056	46	2.41523	70	1.56797	28
ENSMUSG00000040690	Col16a1	111.527	105.721	119.269	-1.16523	-0.220617	0.0359922	0.726352	4	130047840	130099283	1	protein_coding	collagen, type XVI, alpha 1 [Source:MGI Symbol;Acc:MGI:1095396]	ENSMUST00000044565,ENSMUST00000097867,ENSMUST00000106001,ENSMUST00000123617,ENSMUST00000129937,ENSMUST00000132251,ENSMUST00000135675,ENSMUST00000142293,ENSMUST00000143432,ENSMUST00000143577,ENSMUST00000146606,ENSMUST00000151541,ENSMUST00000154441	114.778	3272	89.4087	2468	97.0188	2385	121.679	4185	128.644	2683	103.165	2990	125.998	2250
ENSMUSG00000022591	Gm9747	1.31878	0.849699	1.94422	-1.80856	-0.854845	0.0360549	0.726622	1	82233112	82235933	1	protein_coding	predicted gene 9747 [Source:MGI Symbol;Acc:MGI:3710571]	ENSMUST00000023262	0.350789	10	0.833225	23	1.13901	28	1.07578	37	1.72612	36	1.13861	33	2.96794	53
ENSMUSG00000078566	Bnip3	239.167	249.732	225.079	1.18423	0.243951	0.0361558	0.727174	7	138890836	138909519	-1	protein_coding	BCL2/adenovirus E1B interacting protein 3 [Source:MGI Symbol;Acc:MGI:109326]	ENSMUST00000106112,ENSMUST00000125359,ENSMUST00000130500,ENSMUST00000141223,ENSMUST00000148970	209.21	5964	282.21	7790	253.51	6232	254	8736	254.315	5304	174.414	5055	246.507	4402
ENSMUSG00000039037	St6galnac5	20.1514	18.9809	21.7122	-1.22983	-0.298462	0.036181	0.727174	3	152817081	152982246	-1	protein_coding	ST6 (alpha-N-acetyl-neuraminyl-2,3-beta-galactosyl-1,3)-N-acetylgalactosaminide alpha-2,6-sialyltransferase 5 [Source:MGI Symbol;Acc:MGI:1349471]	ENSMUST00000044278,ENSMUST00000161757	23.117	659	16.5558	457	18.2241	448	18.0265	620	24.3575	508	20.1154	583	20.6636	369
ENSMUSG00000043251	Exoc3l	6.05191	5.1419	7.26525	-1.36832	-0.452409	0.0363307	0.729094	8	105289924	105296101	-1	protein_coding	exocyst complex component 3-like [Source:MGI Symbol;Acc:MGI:3041195]	ENSMUST00000057855,ENSMUST00000212138,ENSMUST00000212215,ENSMUST00000212261,ENSMUST00000212359,ENSMUST00000212777,ENSMUST00000212974	4.91104	140	4.74576	131	6.14249	151	4.76831	164	7.38396	154	9.31587	270	5.0959	91
ENSMUSG00000026043	Col3a1	1978.27	1887.12	2099.8	-1.24837	-0.320047	0.0363755	0.729094	1	45311538	45349706	1	protein_coding	collagen, type III, alpha 1 [Source:MGI Symbol;Acc:MGI:88453]	ENSMUST00000087883,ENSMUST00000123204,ENSMUST00000129611,ENSMUST00000185687,ENSMUST00000186021,ENSMUST00000189818,ENSMUST00000190943	2449.1	69817	1363.52	37638	1821.47	44777	1914.39	65843	2126.82	44357	2072.78	60075	2099.79	37497
ENSMUSG00000089698	Gm2541	1.06047	1.33437	0.695263	1.85324	0.890049	0.0364266	0.729125	16	85553233	85553943	-1	processed_pseudogene	predicted pseudogene 2541 [Source:MGI Symbol;Acc:MGI:3780709]	ENSMUST00000161209	1.36808	39	1.84759	51	1.01697	25	1.10485	38	0.719217	15	0.862581	25	0.503991	9
ENSMUSG00000069972	Rps13-ps2	39.6179	45.2171	32.1523	1.63412	0.708515	0.0365345	0.729579	7	88530446	88530898	-1	processed_pseudogene	ribosomal protein S13, pseudogene 2 [Source:MGI Symbol;Acc:MGI:3704295]	ENSMUST00000182017	29.9924	855	72.9616	2014	28.109	691	49.8056	1713	28.8646	602	50.5127	1464	17.0797	305
ENSMUSG00000069763	Tmem100	4.50706	3.64006	5.66306	-1.42859	-0.514589	0.0365483	0.729579	11	90030348	90036508	1	protein_coding	transmembrane protein 100 [Source:MGI Symbol;Acc:MGI:1915138]	ENSMUST00000092788	3.01678	86	3.40536	94	4.47466	110	3.66346	126	3.59609	75	7.62521	221	5.76789	103
ENSMUSG00000049521	Cdc42ep1	59.1349	56.0107	63.3004	-1.15202	-0.20416	0.0366584	0.73038	15	78842624	78850897	1	protein_coding	CDC42 effector protein (Rho GTPase binding) 1 [Source:MGI Symbol;Acc:MGI:1929763]	ENSMUST00000059619	59.5639	1698	53.6887	1482	58.6588	1442	52.1316	1793	70.5792	1472	60.6912	1759	58.6309	1047
ENSMUSG00000025150	Cbr2	1.14393	1.49525	0.675501	1.8371	0.877432	0.0366958	0.73038	11	120729489	120732114	-1	protein_coding	carbonyl reductase 2 [Source:MGI Symbol;Acc:MGI:107200]	ENSMUST00000026148,ENSMUST00000149450,ENSMUST00000154479,ENSMUST00000154565	2.42044	69	1.01436	28	1.17968	29	1.36653	47	0.479478	10	0.483045	14	1.06398	19
ENSMUSG00000024913	Lrp5	116.738	110.265	125.369	-1.18553	-0.245533	0.0367384	0.73038	19	3584828	3686564	-1	protein_coding	low density lipoprotein receptor-related protein 5 [Source:MGI Symbol;Acc:MGI:1278315]	ENSMUST00000025856,ENSMUST00000176867,ENSMUST00000177294,ENSMUST00000177330	122.636	3496	88.503	2443	115.975	2851	113.945	3919	137.898	2876	124.419	3606	113.79	2032
ENSMUSG00000045613	Chrm2	16.1174	17.5015	14.2719	1.22641	0.29444	0.0367867	0.73038	6	36388084	36528414	1	protein_coding	cholinergic receptor, muscarinic 2, cardiac [Source:MGI Symbol;Acc:MGI:88397]	ENSMUST00000169004,ENSMUST00000172278	17.4693	498	15.8675	438	18.4682	454	18.201	626	13.2336	276	15.5265	450	14.0557	251
ENSMUSG00000028226	Mmp16	12.769	12.2724	13.4312	-1.26195	-0.335655	0.0369576	0.732784	4	17852893	18119145	1	protein_coding	matrix metallopeptidase 16 [Source:MGI Symbol;Acc:MGI:1276107]	ENSMUST00000029881,ENSMUST00000133416,ENSMUST00000139418,ENSMUST00000142434,ENSMUST00000149353,ENSMUST00000183662	16.9782	484	8.58584	237	12.2443	301	11.2811	388	12.1787	254	13.3873	388	14.7277	263
ENSMUSG00000036644	Tbc1d9b	86.2964	82.5093	91.3459	-1.12971	-0.175957	0.0370623	0.733874	11	50131396	50172785	1	protein_coding	TBC1 domain family, member 9B [Source:MGI Symbol;Acc:MGI:1924045]	ENSMUST00000093138,ENSMUST00000101270,ENSMUST00000124605,ENSMUST00000126758,ENSMUST00000137852,ENSMUST00000141520,ENSMUST00000147628,ENSMUST00000148887	87.5569	2496	80.8229	2231	80.8287	1987	80.8286	2780	94.6969	1975	89.2943	2588	90.0463	1608
ENSMUSG00000052504	Epha3	24.4293	23.6345	25.4891	-1.20308	-0.266738	0.0371381	0.734388	16	63543534	63864175	-1	protein_coding	Eph receptor A3 [Source:MGI Symbol;Acc:MGI:99612]	ENSMUST00000064405,ENSMUST00000231270,ENSMUST00000232049,ENSMUST00000232370,ENSMUST00000232461,ENSMUST00000232654	30.1678	860	17.1355	473	19.119	470	28.1156	967	20.9052	436	26.4985	768	29.0635	519
ENSMUSG00000026393	Nek7	64.2399	67.6416	59.7044	1.14122	0.190581	0.0373284	0.737161	1	138482875	138620141	-1	protein_coding	NIMA (never in mitosis gene a)-related expressed kinase 7 [Source:MGI Symbol;Acc:MGI:1890645]	ENSMUST00000027642,ENSMUST00000186017,ENSMUST00000187407,ENSMUST00000191549	65.9834	1881	70.4257	1944	64.2318	1579	69.9255	2405	57.6333	1202	60.5532	1755	60.9269	1088
ENSMUSG00000021536	Adcy2	4.63522	4.13023	5.30853	-1.42726	-0.513251	0.0373999	0.737585	13	68620043	68999541	-1	protein_coding	adenylate cyclase 2 [Source:MGI Symbol;Acc:MGI:99676]	ENSMUST00000022013	5.29691	151	2.9344	81	3.98652	98	4.30311	148	5.75374	120	4.79595	139	5.3759	96
ENSMUSG00000067924	Rtl8b	77.3899	72.9558	83.3021	-1.13067	-0.177172	0.0374729	0.738036	X	53669177	53670408	-1	protein_coding	retrotransposon Gag like 8B [Source:MGI Symbol;Acc:MGI:3576504]	ENSMUST00000088778	70.7541	2017	76.9465	2124	75.8252	1864	68.2973	2349	85.0115	1773	87.2242	2528	77.6705	1387
ENSMUSG00000071553	Cpa2	2.53263	2.10621	3.10119	-1.56939	-0.650208	0.037527	0.738114	6	30541582	30564476	1	protein_coding	carboxypeptidase A2, pancreatic [Source:MGI Symbol;Acc:MGI:3617840]	ENSMUST00000096066,ENSMUST00000123588,ENSMUST00000126426,ENSMUST00000131137,ENSMUST00000133009,ENSMUST00000142653,ENSMUST00000144282,ENSMUST00000146936	2.63092	75	1.66645	46	1.83054	45	2.29693	79	2.06176	43	4.10588	119	3.13594	56
ENSMUSG00000087400	Gm15270	2.72372	2.19732	3.42558	-1.51118	-0.595674	0.0375896	0.73836	10	24549441	24597108	-1	lncRNA	predicted gene 15270 [Source:MGI Symbol;Acc:MGI:3705149]	ENSMUST00000125158,ENSMUST00000136908,ENSMUST00000141076,ENSMUST00000146208	1.96442	56	1.88381	52	2.64412	65	2.29693	79	3.2125	67	3.31231	96	3.75193	67
ENSMUSG00000021377	Dek	164.654	174.278	151.821	1.15792	0.211541	0.0376658	0.738872	13	47084775	47106201	-1	protein_coding	DEK oncogene (DNA binding) [Source:MGI Symbol;Acc:MGI:1926209]	ENSMUST00000021807,ENSMUST00000129352,ENSMUST00000135278,ENSMUST00000138401,ENSMUST00000143933,ENSMUST00000150652,ENSMUST00000224150	169.887	4843	183.781	5073	165.156	4060	178.288	6132	140.535	2931	160.371	4648	154.557	2760
ENSMUSG00000006586	Runx1t1	36.9445	39.7258	33.2362	1.17092	0.227637	0.0377678	0.739485	4	13743436	13893649	1	protein_coding	RUNX1 translocation partner 1 [Source:MGI Symbol;Acc:MGI:104793]	ENSMUST00000006761,ENSMUST00000098256,ENSMUST00000098257,ENSMUST00000105566,ENSMUST00000139736,ENSMUST00000150583	42.0946	1200	37.7487	1042	37.8312	930	41.2284	1418	34.3786	717	32.1225	931	33.2074	593
ENSMUSG00000087143	A830082K12Rik	2.51651	3.02352	1.8405	1.53243	0.615824	0.0377975	0.739485	13	78198017	78279391	1	lncRNA	RIKEN cDNA A830082K12 gene [Source:MGI Symbol;Acc:MGI:2443527]	ENSMUST00000123998,ENSMUST00000131564,ENSMUST00000134705,ENSMUST00000137199,ENSMUST00000144545,ENSMUST00000145613,ENSMUST00000183171	3.6482	104	2.64458	73	3.21362	79	2.58768	89	1.53433	32	2.1392	62	1.84797	33
ENSMUSG00000062939	Stat4	3.58473	3.16738	4.14119	-1.48335	-0.56886	0.037908	0.740663	1	51987148	52107189	1	protein_coding	signal transducer and activator of transcription 4 [Source:MGI Symbol;Acc:MGI:103062]	ENSMUST00000027277,ENSMUST00000168302,ENSMUST00000187053,ENSMUST00000187554	4.4901	128	2.35477	65	3.09159	76	2.73305	94	2.92482	61	3.89886	113	5.59989	100
ENSMUSG00000030680	Pagr1a	3.05572	3.4723	2.50029	1.61274	0.689513	0.0380721	0.742885	7	127015033	127017352	-1	protein_coding	PAXIP1 associated glutamate rich protein 1A [Source:MGI Symbol;Acc:MGI:1914528]	ENSMUST00000162069,ENSMUST00000200948,ENSMUST00000206416	2.94663	84	2.10118	58	5.00349	123	3.83791	132	1.43843	30	4.83045	140	1.23198	22
ENSMUSG00000020053	Igf1	163.823	158.097	171.458	-1.15038	-0.202106	0.03819	0.744199	10	87858265	87937042	1	protein_coding	insulin-like growth factor 1 [Source:MGI Symbol;Acc:MGI:96432]	ENSMUST00000062862,ENSMUST00000095360,ENSMUST00000105300,ENSMUST00000121161,ENSMUST00000121952,ENSMUST00000122100,ENSMUST00000122386,ENSMUST00000126490	186.304	5311	143.061	3949	147.908	3636	155.115	5335	175.249	3655	154.16	4468	184.965	3303
ENSMUSG00000035370	Gm49322	6.05376	6.95767	4.84855	1.41423	0.500021	0.0382873	0.744721	10	80606021	80615784	1	protein_coding	predicted gene, 49322 [Source:MGI Symbol;Acc:MGI:6121503]	ENSMUST00000178231,ENSMUST00000218067,ENSMUST00000219462	6.1388	175	5.76012	159	11.1053	273	4.82646	166	4.84273	101	5.27899	153	4.42392	79
ENSMUSG00000029860	Zyx	388.99	358.908	429.1	-1.18563	-0.245658	0.0383179	0.744721	6	42349630	42360213	1	protein_coding	zyxin [Source:MGI Symbol;Acc:MGI:103072]	ENSMUST00000070635,ENSMUST00000164375,ENSMUST00000203290,ENSMUST00000203329,ENSMUST00000203401,ENSMUST00000203626,ENSMUST00000203652,ENSMUST00000203846,ENSMUST00000203849,ENSMUST00000204270,ENSMUST00000204480	356.226	10155	351.766	9710	364.319	8956	363.322	12496	495.828	10341	403.791	11703	387.681	6923
ENSMUSG00000009640	Dmap1	31.6946	30.1566	33.7453	-1.17567	-0.233478	0.0385222	0.746583	4	117674681	117682273	-1	protein_coding	DNA methyltransferase 1-associated protein 1 [Source:MGI Symbol;Acc:MGI:1913483]	ENSMUST00000102687,ENSMUST00000123586,ENSMUST00000127750,ENSMUST00000129510,ENSMUST00000134642,ENSMUST00000135582	34.4475	982	28.4383	785	30.6718	754	27.0689	931	34.0429	710	33.9857	985	33.2074	593
ENSMUSG00000032370	Lactb	14.4869	13.185	16.2227	-1.23569	-0.305321	0.0385773	0.746583	9	66955388	66975484	-1	protein_coding	lactamase, beta [Source:MGI Symbol;Acc:MGI:1933395]	ENSMUST00000034929,ENSMUST00000215172	13.4001	382	13.0418	360	13.7087	337	12.5895	433	14.7679	308	17.0446	494	16.8557	301
ENSMUSG00000020682	Mmp28	29.2887	26.2704	33.3131	-1.32708	-0.408259	0.0386767	0.746583	11	83440768	83463071	-1	protein_coding	matrix metallopeptidase 28 (epilysin) [Source:MGI Symbol;Acc:MGI:2153062]	ENSMUST00000021020,ENSMUST00000103209,ENSMUST00000108137,ENSMUST00000119346,ENSMUST00000138780	30.7993	878	19.6351	542	30.4277	748	24.2195	833	44.3997	926	29.5003	855	26.0395	465
ENSMUSG00000008090	Fgfrl1	130.828	121.31	143.518	-1.19768	-0.260237	0.0386924	0.746583	5	108692382	108706924	1	protein_coding	fibroblast growth factor receptor-like 1 [Source:MGI Symbol;Acc:MGI:2150920]	ENSMUST00000013633,ENSMUST00000112560,ENSMUST00000196222,ENSMUST00000197255,ENSMUST00000199802	126.354	3602	105.385	2909	134.118	3297	119.382	4106	165.42	3450	127.041	3682	138.093	2466
ENSMUSG00000090338	Gm17081	2.95069	2.61696	3.39565	-1.52373	-0.607603	0.0387431	0.746583	4	42239725	42242073	1	unprocessed_pseudogene	predicted gene 17081 [Source:MGI Symbol;Acc:MGI:4937908]	ENSMUST00000167363	3.78852	108	3.44158	95	1.87122	46	1.36653	47	5.22631	109	2.1047	61	2.85595	51
ENSMUSG00000056413	Adap1	7.2614	8.28713	5.89377	1.33884	0.420986	0.038779	0.746583	5	139271876	139325622	-1	protein_coding	ArfGAP with dual PH domains 1 [Source:MGI Symbol;Acc:MGI:2442201]	ENSMUST00000110865,ENSMUST00000123748,ENSMUST00000126762,ENSMUST00000151450,ENSMUST00000156815,ENSMUST00000196271	9.50637	271	9.0568	250	6.99675	172	7.58859	261	5.56195	116	5.17548	150	6.94387	124
ENSMUSG00000030064	Frmd4b	101.04	106.862	93.2767	1.13936	0.188226	0.0388258	0.746583	6	97286867	97617541	-1	protein_coding	FERM domain containing 4B [Source:MGI Symbol;Acc:MGI:2141794]	ENSMUST00000032146,ENSMUST00000113353,ENSMUST00000113355,ENSMUST00000113359,ENSMUST00000124050,ENSMUST00000126899,ENSMUST00000138301,ENSMUST00000142589,ENSMUST00000143698,ENSMUST00000146191,ENSMUST00000152385,ENSMUST00000155326,ENSMUST00000203486	108.464	3092	107.559	2969	113.412	2788	98.012	3371	98.6766	2058	88.8113	2574	92.3423	1649
ENSMUSG00000037138	Aff3	25.2365	27.2313	22.5767	1.17991	0.238673	0.0388974	0.746583	1	38177326	38664955	-1	protein_coding	AF4/FMR2 family, member 3 [Source:MGI Symbol;Acc:MGI:106927]	ENSMUST00000027250,ENSMUST00000039827,ENSMUST00000095027,ENSMUST00000134963,ENSMUST00000136641,ENSMUST00000238906	28.9401	825	28.1485	777	24.6513	606	27.1852	935	23.878	498	21.5645	625	22.2876	398
ENSMUSG00000085667	Gm12992	9.10981	7.8037	10.8513	-1.32472	-0.405683	0.0389127	0.746583	4	131899478	131920029	-1	lncRNA	predicted gene 12992 [Source:MGI Symbol;Acc:MGI:3702644]	ENSMUST00000124738,ENSMUST00000132111	6.77022	193	6.88317	190	8.86797	218	8.69344	299	11.6513	243	8.69481	252	12.2078	218
ENSMUSG00000026014	Raph1	152.632	159.701	143.206	1.14227	0.191903	0.0389204	0.746583	1	60482292	60567104	-1	protein_coding	Ras association (RalGDS/AF-6) and pleckstrin homology domains 1 [Source:MGI Symbol;Acc:MGI:1924550]	ENSMUST00000027168,ENSMUST00000090293,ENSMUST00000127573,ENSMUST00000140485,ENSMUST00000142258,ENSMUST00000182085,ENSMUST00000188511,ENSMUST00000189383	148.068	4221	170.05	4694	161.413	3968	159.273	5478	146.672	3059	137.909	3997	145.037	2590
ENSMUSG00000031994	Adamts8	44.8378	47.6109	41.1403	1.18497	0.244853	0.0389997	0.74713	9	30942562	30963838	1	protein_coding	a disintegrin-like and metallopeptidase (reprolysin type) with thrombospondin type 1 motif, 8 [Source:MGI Symbol;Acc:MGI:1353468]	ENSMUST00000068135,ENSMUST00000163037	46.5497	1327	45.284	1250	46.7399	1149	51.8699	1784	40.9474	854	31.5705	915	50.903	909
ENSMUSG00000020029	Nudt4	126.05	131.074	119.351	1.14847	0.19971	0.0391753	0.74952	10	95547007	95564146	-1	protein_coding	nudix (nucleoside diphosphate linked moiety X)-type motif 4 [Source:MGI Symbol;Acc:MGI:1918457]	ENSMUST00000020217	113.164	3226	126.686	3497	121.507	2987	162.937	5604	100.547	2097	117.621	3409	139.885	2498
ENSMUSG00000051726	Kcnf1	6.53231	7.17676	5.67304	1.33893	0.421077	0.0392484	0.749944	12	17172100	17176888	-1	protein_coding	potassium voltage-gated channel, subfamily F, member 1 [Source:MGI Symbol;Acc:MGI:2687399]	ENSMUST00000170580	6.10372	174	7.39035	204	7.56625	186	7.64674	263	5.70579	119	4.76145	138	6.55188	117
ENSMUSG00000034911	Ushbp1	3.84346	3.31254	4.55135	-1.42813	-0.514131	0.0393853	0.751586	8	71384272	71395802	-1	protein_coding	USH1 protein network component harmonin binding protein 1 [Source:MGI Symbol;Acc:MGI:1922920]	ENSMUST00000049184,ENSMUST00000212496,ENSMUST00000212516,ENSMUST00000212626,ENSMUST00000213000	3.68328	105	2.9344	81	3.78312	93	2.84936	98	4.89068	102	4.89946	142	3.86393	69
ENSMUSG00000030930	Chst15	10.4478	11.6559	8.83709	1.30104	0.379661	0.0395607	0.753427	7	132235780	132317228	-1	protein_coding	carbohydrate sulfotransferase 15 [Source:MGI Symbol;Acc:MGI:1924840]	ENSMUST00000077472,ENSMUST00000080215,ENSMUST00000132508,ENSMUST00000207068	11.9268	340	9.34661	258	13.9528	343	11.3974	392	8.10318	169	8.38428	243	10.0238	179
ENSMUSG00000075334	Rprm	3.71044	4.40863	2.77951	1.47075	0.556549	0.0396219	0.753427	2	54084093	54085552	-1	protein_coding	reprimo, TP53 dependent G2 arrest mediator candidate [Source:MGI Symbol;Acc:MGI:1915124]	ENSMUST00000100089	5.19167	148	3.36913	93	5.41027	133	3.66346	126	2.92482	61	2.72575	79	2.68795	48
ENSMUSG00000028035	Dnajb4	74.5103	78.172	69.6281	1.12971	0.175956	0.0396352	0.753427	3	152178511	152210302	-1	protein_coding	DnaJ heat shock protein family (Hsp40) member B4 [Source:MGI Symbol;Acc:MGI:1914285]	ENSMUST00000029669,ENSMUST00000050073,ENSMUST00000134701,ENSMUST00000144950,ENSMUST00000153355,ENSMUST00000196291,ENSMUST00000197941	76.928	2193	75.4975	2084	79.6083	1957	80.6542	2774	64.2501	1340	71.8357	2082	72.7986	1300
ENSMUSG00000028405	Aco1	58.1114	55.8113	61.1782	-1.13978	-0.188753	0.0397578	0.75424	4	40143081	40198338	1	protein_coding	aconitase 1 [Source:MGI Symbol;Acc:MGI:87879]	ENSMUST00000102973,ENSMUST00000135787,ENSMUST00000142360,ENSMUST00000152911	62.265	1775	54.0872	1493	51.8247	1274	55.0681	1894	57.5374	1200	62.8304	1821	63.1668	1128
ENSMUSG00000024042	Sik1	93.8894	96.5779	90.3046	1.13132	0.178008	0.0398449	0.75424	17	31844250	31855804	-1	protein_coding	salt inducible kinase 1 [Source:MGI Symbol;Acc:MGI:104754]	ENSMUST00000024839,ENSMUST00000234142,ENSMUST00000234331,ENSMUST00000234867	80.2254	2287	103.791	2865	103.527	2545	98.7679	3397	94.8408	1978	83.8428	2430	92.2303	1647
ENSMUSG00000081228	Gm16089	4.57652	5.14283	3.82145	1.41094	0.496661	0.0398505	0.75424	5	137615627	137615962	1	processed_pseudogene	predicted gene 16089 [Source:MGI Symbol;Acc:MGI:3801884]	ENSMUST00000117679	4.84088	138	8.40471	232	1.83054	45	5.49518	189	6.6168	138	1.20761	35	3.63993	65
ENSMUSG00000047881	Rell1	18.0403	16.616	19.9393	-1.21312	-0.278717	0.0399493	0.75424	5	63908897	63968897	-1	protein_coding	RELT-like 1 [Source:MGI Symbol;Acc:MGI:2140767]	ENSMUST00000087327,ENSMUST00000127314,ENSMUST00000128967,ENSMUST00000154169,ENSMUST00000154532	17.0133	485	14.7807	408	16.3529	402	18.3173	630	19.3709	404	19.8394	575	20.6076	368
ENSMUSG00000024909	Efemp2	94.1315	88.643	101.449	-1.15049	-0.202248	0.0400663	0.75424	19	5473954	5482517	1	protein_coding	epidermal growth factor-containing fibulin-like extracellular matrix protein 2 [Source:MGI Symbol;Acc:MGI:1891209]	ENSMUST00000070118,ENSMUST00000164204,ENSMUST00000164388,ENSMUST00000165485,ENSMUST00000166253,ENSMUST00000166303,ENSMUST00000166558,ENSMUST00000167304,ENSMUST00000167371,ENSMUST00000167827,ENSMUST00000167855,ENSMUST00000167920,ENSMUST00000168330,ENSMUST00000169943,ENSMUST00000235523,ENSMUST00000236109,ENSMUST00000236518	90.3281	2575	81.4749	2249	93.6832	2303	89.086	3064	110.616	2307	93.1587	2700	100.574	1796
ENSMUSG00000003948	Mmd	120.808	126.616	113.064	1.15163	0.20368	0.0400804	0.75424	11	90249456	90278589	1	protein_coding	monocyte to macrophage differentiation-associated [Source:MGI Symbol;Acc:MGI:1914718]	ENSMUST00000004050,ENSMUST00000107887	115.339	3288	142.337	3929	125.86	3094	122.929	4228	108.074	2254	120.071	3480	111.046	1983
ENSMUSG00000015647	Lama5	185.609	195.645	172.228	1.16197	0.216577	0.0400823	0.75424	2	180176373	180225859	-1	protein_coding	laminin, alpha 5 [Source:MGI Symbol;Acc:MGI:105382]	ENSMUST00000015791,ENSMUST00000123906,ENSMUST00000130796,ENSMUST00000149812	182.41	5200	186.86	5158	197.048	4844	216.26	7438	188.099	3923	161.82	4690	166.765	2978
ENSMUSG00000068015	Lrch1	23.1663	24.6952	21.1277	1.1989	0.261716	0.0400875	0.75424	14	74754675	74947876	-1	protein_coding	leucine-rich repeats and calponin homology (CH) domain containing 1 [Source:MGI Symbol;Acc:MGI:2443390]	ENSMUST00000088970,ENSMUST00000226799,ENSMUST00000227433,ENSMUST00000228134,ENSMUST00000228252,ENSMUST00000229311,ENSMUST00000230218,ENSMUST00000230381	22.661	646	27.7138	765	24.0411	591	24.3649	838	21.1929	442	22.2546	645	19.9356	356
ENSMUSG00000017697	Ada	3.99464	3.42718	4.75125	-1.41721	-0.503049	0.0403255	0.757748	2	163726584	163750239	-1	protein_coding	adenosine deaminase [Source:MGI Symbol;Acc:MGI:87916]	ENSMUST00000017841,ENSMUST00000156939	3.6482	104	3.69517	102	3.2543	80	3.11103	107	4.65094	97	4.45092	129	5.1519	92
ENSMUSG00000051095	Olfr986	5.91971	6.62246	4.98272	1.35593	0.439282	0.040425	0.758614	9	40180920	40190134	1	protein_coding	olfactory receptor 986 [Source:MGI Symbol;Acc:MGI:3030820]	ENSMUST00000062229,ENSMUST00000214763,ENSMUST00000216720,ENSMUST00000218134	6.27912	179	7.13676	197	6.18317	152	6.89079	237	4.3153	90	4.86495	141	5.76789	103
ENSMUSG00000014773	Dll1	8.01187	6.79589	9.63318	-1.40356	-0.489092	0.0404745	0.758614	17	15367354	15376872	-1	protein_coding	delta like canonical Notch ligand 1 [Source:MGI Symbol;Acc:MGI:104659]	ENSMUST00000014917,ENSMUST00000124196,ENSMUST00000129395,ENSMUST00000140784,ENSMUST00000143460,ENSMUST00000152416	7.12101	203	6.73826	186	5.7357	141	7.58859	261	7.38396	154	13.2837	385	8.23185	147
ENSMUSG00000054580	Pla2r1	11.1485	12.1878	9.76275	1.28911	0.366372	0.0405482	0.759028	2	60417543	60553308	-1	protein_coding	phospholipase A2 receptor 1 [Source:MGI Symbol;Acc:MGI:102468]	ENSMUST00000112525,ENSMUST00000126327,ENSMUST00000128208,ENSMUST00000134583,ENSMUST00000136034,ENSMUST00000150373	11.2252	320	13.5127	373	13.1392	323	10.8741	374	11.3157	236	8.00475	232	9.96781	178
ENSMUSG00000067719	Gm10221	33.2584	34.9437	31.0113	1.22179	0.288999	0.0406114	0.759247	5	24581554	24581862	-1	processed_pseudogene	predicted gene 10221 [Source:MGI Symbol;Acc:MGI:3708709]	ENSMUST00000088299	25.4673	726	45.9723	1269	31.1192	765	37.2161	1280	33.2758	694	34.0547	987	25.7035	459
ENSMUSG00000101698	Gm29562	13.2698	14.5068	11.6206	1.2471	0.318572	0.040784	0.760112	9	88827522	88828425	1	lncRNA	predicted gene 29562 [Source:MGI Symbol;Acc:MGI:5580268]	ENSMUST00000190113	14.4876	413	13.549	374	14.1155	347	15.875	546	10.7883	225	12.5937	365	11.4798	205
ENSMUSG00000097767	Miat	1.94675	1.20108	2.94097	-1.83315	-0.874324	0.0408278	0.760112	5	112213228	112229395	-1	lncRNA	myocardial infarction associated transcript (non-protein coding) [Source:MGI Symbol;Acc:MGI:2444886]	ENSMUST00000181535,ENSMUST00000182258,ENSMUST00000182509,ENSMUST00000182699,ENSMUST00000182953,ENSMUST00000183036	1.08745	31	1.30418	36	0.813575	20	1.59913	55	1.43843	30	1.00059	29	6.38388	114
ENSMUSG00000024516	Sec11c	15.261	14.1387	16.7574	-1.24684	-0.318271	0.0408439	0.760112	18	65800515	65817684	1	protein_coding	SEC11 homolog C, signal peptidase complex subunit [Source:MGI Symbol;Acc:MGI:1913536]	ENSMUST00000025394,ENSMUST00000125552,ENSMUST00000126432,ENSMUST00000126651,ENSMUST00000139538,ENSMUST00000153193,ENSMUST00000155668,ENSMUST00000235411,ENSMUST00000235765,ENSMUST00000235959,ENSMUST00000236847	16.1012	459	14.8531	410	13.9121	342	11.6882	402	15.631	326	17.1136	496	17.5277	313
ENSMUSG00000086938	4930481A15Rik	2.88407	2.26175	3.71382	-1.49553	-0.580658	0.040864	0.760112	19	5406740	5422847	1	lncRNA	RIKEN cDNA 4930481A15 gene [Source:MGI Symbol;Acc:MGI:1922181]	ENSMUST00000128542,ENSMUST00000153017,ENSMUST00000174412,ENSMUST00000174415,ENSMUST00000174754	1.64871	47	2.1374	59	2.64412	65	2.61675	90	3.88377	81	3.00178	87	4.25592	76
ENSMUSG00000070643	Sox13	42.7034	39.5418	46.9188	-1.20692	-0.271325	0.0409462	0.760171	1	133382303	133424377	-1	protein_coding	SRY (sex determining region Y)-box 13 [Source:MGI Symbol;Acc:MGI:98361]	ENSMUST00000094551,ENSMUST00000126530,ENSMUST00000144386,ENSMUST00000145922,ENSMUST00000153799	42.235	1204	34.5607	954	41.8584	1029	39.513	1359	55.5236	1158	40.7138	1180	44.5192	795
ENSMUSG00000026676	Ccdc3	5.73137	4.55188	7.30403	-1.54894	-0.631282	0.0409704	0.760171	2	5137776	5230878	1	protein_coding	coiled-coil domain containing 3 [Source:MGI Symbol;Acc:MGI:1921436]	ENSMUST00000027988	5.26183	150	3.26045	90	3.98652	98	5.69871	196	4.12351	86	12.5247	363	5.2639	94
ENSMUSG00000018160	Med1	62.8427	66.3611	58.1516	1.13788	0.186349	0.0410875	0.761386	11	98152154	98193293	-1	protein_coding	mediator complex subunit 1 [Source:MGI Symbol;Acc:MGI:1100846]	ENSMUST00000018304,ENSMUST00000092735,ENSMUST00000107545,ENSMUST00000126483,ENSMUST00000129557,ENSMUST00000135479,ENSMUST00000147933	66.8603	1906	62.673	1730	67.9335	1670	67.9775	2338	59.4553	1240	59.0005	1710	55.9989	1000
ENSMUSG00000021990	Spata13	83.4178	87.7462	77.6466	1.12776	0.173457	0.041221	0.762899	14	60634001	60764556	1	protein_coding	spermatogenesis associated 13 [Source:MGI Symbol;Acc:MGI:104838]	ENSMUST00000022566,ENSMUST00000159135,ENSMUST00000159169,ENSMUST00000159729,ENSMUST00000160095,ENSMUST00000160973,ENSMUST00000162131,ENSMUST00000162939,ENSMUST00000162945	88.3637	2519	85.6411	2364	89.2899	2195	87.6904	3016	76.5727	1597	81.4966	2362	74.8706	1337
ENSMUSG00000071713	Csf2rb	3.33906	3.71038	2.84397	1.44131	0.527385	0.0412759	0.762958	15	78325752	78353847	1	protein_coding	colony stimulating factor 2 receptor, beta, low-affinity (granulocyte-macrophage) [Source:MGI Symbol;Acc:MGI:1339759]	ENSMUST00000096355,ENSMUST00000229034,ENSMUST00000229657,ENSMUST00000229678,ENSMUST00000229920,ENSMUST00000230264,ENSMUST00000231769,ENSMUST00000231888	2.56076	73	3.98499	110	3.49837	86	4.79738	165	2.54123	53	2.51874	73	3.47193	62
ENSMUSG00000039126	Prune2	22.0571	23.31	20.3865	1.19289	0.254464	0.0413746	0.763823	19	16956118	17223932	1	protein_coding	prune homolog 2 [Source:MGI Symbol;Acc:MGI:1925004]	ENSMUST00000087689,ENSMUST00000223920,ENSMUST00000224059,ENSMUST00000224117,ENSMUST00000224145,ENSMUST00000224602,ENSMUST00000225351,ENSMUST00000225838,ENSMUST00000226052	20.1704	575	26.2285	724	25.1802	619	21.6609	745	21.2409	443	21.047	610	18.8716	337
ENSMUSG00000025932	Eya1	1.85284	2.31507	1.23654	1.88807	0.916911	0.041561	0.766254	1	14168954	14310235	-1	protein_coding	EYA transcriptional coactivator and phosphatase 1 [Source:MGI Symbol;Acc:MGI:109344]	ENSMUST00000027066,ENSMUST00000080664,ENSMUST00000168081,ENSMUST00000185329,ENSMUST00000185453,ENSMUST00000187790,ENSMUST00000188857,ENSMUST00000189526,ENSMUST00000190337	2.24505	64	2.1374	59	1.50511	37	3.37271	116	0.958956	20	1.96668	57	0.783985	14
ENSMUSG00000014592	Camta1	96.0691	99.494	91.5027	1.12548	0.170547	0.041625	0.766254	4	150917322	151861876	-1	protein_coding	calmodulin binding transcription activator 1 [Source:MGI Symbol;Acc:MGI:2140230]	ENSMUST00000049790,ENSMUST00000097774,ENSMUST00000105668,ENSMUST00000105670,ENSMUST00000131948,ENSMUST00000135780,ENSMUST00000140030,ENSMUST00000143434,ENSMUST00000153938,ENSMUST00000155685,ENSMUST00000169423,ENSMUST00000185034,ENSMUST00000214673	89.2056	2543	102.632	2833	104.056	2558	102.083	3511	93.0667	1941	95.0909	2756	86.3504	1542
ENSMUSG00000029019	Nppb	16.6476	8.71361	27.2262	-1.89335	-0.920945	0.0416627	0.766254	4	147985788	147987205	1	protein_coding	natriuretic peptide type B [Source:MGI Symbol;Acc:MGI:97368]	ENSMUST00000103231	3.99899	114	10.8682	300	7.2815	179	12.7058	437	10.2129	213	58.1379	1685	13.3277	238
ENSMUSG00000025478	Dpysl4	8.18339	7.30821	9.35028	-1.32791	-0.409157	0.0417143	0.766254	7	139086001	139102704	1	protein_coding	dihydropyrimidinase-like 4 [Source:MGI Symbol;Acc:MGI:1349764]	ENSMUST00000026551,ENSMUST00000121184,ENSMUST00000122844,ENSMUST00000139364,ENSMUST00000145499,ENSMUST00000154273	8.38385	239	6.48467	179	7.03742	173	7.32691	252	10.2129	213	7.14217	207	10.6958	191
ENSMUSG00000025666	Tmem47	42.7022	45.2549	39.2986	1.17669	0.234729	0.0418572	0.766819	X	81070698	81097872	1	protein_coding	transmembrane protein 47 [Source:MGI Symbol;Acc:MGI:2177570]	ENSMUST00000026760,ENSMUST00000150052,ENSMUST00000171953	42.9716	1225	48.2184	1331	45.7229	1124	44.1069	1517	34.1388	712	45.5098	1319	38.2473	683
ENSMUSG00000054072	Iigp1	81.1822	84.7039	76.4864	-1.14976	-0.201329	0.0418872	0.766819	18	60376027	60392634	1	protein_coding	interferon inducible GTPase 1 [Source:MGI Symbol;Acc:MGI:1926259]	ENSMUST00000032473,ENSMUST00000066912,ENSMUST00000235989,ENSMUST00000237185,ENSMUST00000237794	139.684	3982	58.4345	1613	76.1506	1872	64.5466	2220	64.1542	1338	77.6668	2251	87.6384	1565
ENSMUSG00000029528	Pxn	82.0443	78.511	86.7554	-1.12992	-0.176216	0.0419543	0.766819	5	115506676	115555987	1	protein_coding	paxillin [Source:MGI Symbol;Acc:MGI:108295]	ENSMUST00000067268,ENSMUST00000086523,ENSMUST00000125007,ENSMUST00000125054,ENSMUST00000129897,ENSMUST00000134198,ENSMUST00000137716,ENSMUST00000138139,ENSMUST00000139834,ENSMUST00000152156,ENSMUST00000153682,ENSMUST00000157050,ENSMUST00000202564,ENSMUST00000212819	83.8385	2390	78.3594	2163	74.1574	1823	77.6885	2672	91.6762	1912	86.7756	2515	81.8145	1461
ENSMUSG00000103865	Gm37416	1.74023	1.48008	2.0871	-1.61982	-0.695834	0.0420109	0.766819	2	16023108	16023425	-1	TEC	predicted gene, 37416 [Source:MGI Symbol;Acc:MGI:5610644]	ENSMUST00000193596	1.92934	55	1.95627	54	0.813575	20	1.22115	42	2.58918	54	1.65615	48	2.01596	36
ENSMUSG00000022790	Igsf11	1.24496	1.50715	0.895371	1.71745	0.780269	0.0420261	0.766819	16	38892671	39027159	1	protein_coding	immunoglobulin superfamily, member 11 [Source:MGI Symbol;Acc:MGI:2388477]	ENSMUST00000023478,ENSMUST00000114706,ENSMUST00000209958,ENSMUST00000210186,ENSMUST00000210471	1.43823	41	1.66645	46	1.58647	39	1.33745	46	0.863061	18	0.759071	22	1.06398	19
ENSMUSG00000030513	Pcsk6	49.8144	46.2794	54.5278	-1.15163	-0.20368	0.0420574	0.766819	7	65861734	66050386	1	protein_coding	proprotein convertase subtilisin/kexin type 6 [Source:MGI Symbol;Acc:MGI:102897]	ENSMUST00000055576,ENSMUST00000098391,ENSMUST00000176199,ENSMUST00000176209,ENSMUST00000177272,ENSMUST00000177369	43.0067	1226	48.1459	1329	44.6246	1097	49.3404	1697	51.7357	1079	56.6888	1643	55.159	985
ENSMUSG00000097615	Gm2061	1.67321	1.86683	1.41505	1.61492	0.691465	0.0422345	0.767361	1	185447116	185455568	-1	lncRNA	predicted gene 2061 [Source:MGI Symbol;Acc:MGI:3780228]	ENSMUST00000180623	0.701577	20	1.52154	42	1.46444	36	3.77976	130	0.815113	17	0.96609	28	2.46395	44
ENSMUSG00000020905	Usp43	1.95078	1.56637	2.46333	-1.56784	-0.648782	0.0422487	0.767361	11	67854523	67922153	-1	protein_coding	ubiquitin specific peptidase 43 [Source:MGI Symbol;Acc:MGI:2444541]	ENSMUST00000021288,ENSMUST00000108677,ENSMUST00000129961,ENSMUST00000152120	1.50839	43	1.77513	49	1.78987	44	1.19208	41	2.49329	52	2.65675	77	2.23996	40
ENSMUSG00000030219	Erp27	2.38064	2.05396	2.81622	-1.54437	-0.627018	0.0422873	0.767361	6	136907311	136922180	-1	protein_coding	endoplasmic reticulum protein 27 [Source:MGI Symbol;Acc:MGI:1916437]	ENSMUST00000032343,ENSMUST00000162243,ENSMUST00000162755	2.73615	78	1.66645	46	2.15597	53	1.65728	57	2.78097	58	2.58774	75	3.07994	55
ENSMUSG00000090394	4930523C07Rik	19.4584	20.9356	17.4889	1.23646	0.306215	0.0422955	0.767361	1	160044382	160080208	1	protein_coding	RIKEN cDNA 4930523C07 gene [Source:MGI Symbol;Acc:MGI:1914897]	ENSMUST00000060298,ENSMUST00000097513,ENSMUST00000163892,ENSMUST00000165923,ENSMUST00000168250,ENSMUST00000191933	19.4337	554	21.9899	607	22.5767	555	19.742	679	20.4737	427	14.3533	416	17.6397	315
ENSMUSG00000008734	Gprc5b	19.105	17.9094	20.6991	-1.21063	-0.275761	0.042554	0.77009	7	118972047	118995211	-1	protein_coding	G protein-coupled receptor, family C, group 5, member B [Source:MGI Symbol;Acc:MGI:1927596]	ENSMUST00000008878,ENSMUST00000207582,ENSMUST00000207614,ENSMUST00000208394	20.3808	581	16.6283	459	17.9393	441	16.6891	574	21.0491	439	21.8405	633	19.2076	343
ENSMUSG00000061331	Gm17132	7.25527	8.01337	6.24446	1.31627	0.396453	0.0425662	0.77009	5	127877333	127878490	1	unprocessed_pseudogene	predicted gene 17132 [Source:MGI Symbol;Acc:MGI:4937959]	ENSMUST00000109542	7.50688	214	7.75262	214	8.6239	212	8.17009	281	5.56195	116	6.00356	174	7.16787	128
ENSMUSG00000020807	4933427D14Rik	10.294	8.12585	13.1848	-1.50265	-0.587509	0.0426027	0.77009	11	72153929	72207459	-1	protein_coding	RIKEN cDNA 4933427D14 gene [Source:MGI Symbol;Acc:MGI:1921727]	ENSMUST00000108505,ENSMUST00000131546,ENSMUST00000142530,ENSMUST00000144553,ENSMUST00000151411,ENSMUST00000154093,ENSMUST00000156696,ENSMUST00000238653	6.20896	177	7.93375	219	4.84077	119	13.5199	465	6.6168	138	15.3539	445	17.5837	314
ENSMUSG00000083380	Ndufb4c	32.3671	29.3957	36.329	-1.17219	-0.229203	0.0427046	0.770512	15	73809507	73809896	-1	processed_pseudogene	NADH:ubiquinone oxidoreductase subunit B4C [Source:MGI Symbol;Acc:MGI:3781422]	ENSMUST00000120938	24.4851	698	33.2928	919	30.4684	749	29.3367	1009	35.7211	745	36.6424	1062	36.6233	654
ENSMUSG00000071793	2610005L07Rik	40.6189	43.7108	36.4963	1.17706	0.235185	0.0427307	0.770512	8	20385782	20424814	-1	transcribed_unprocessed_pseudogene	RIKEN cDNA 2610005L07 gene [Source:MGI Symbol;Acc:MGI:1914283]	ENSMUST00000139264,ENSMUST00000140111	46.69	1331	43.4726	1200	41.1262	1011	43.5544	1498	40.468	844	38.7816	1124	30.2394	540
ENSMUSG00000040978	Gm11992	2.05416	2.32877	1.68801	1.55551	0.63739	0.0428317	0.770887	11	9048594	9069356	1	protein_coding	predicted gene 11992 [Source:MGI Symbol;Acc:MGI:3651127]	ENSMUST00000043285	1.43823	41	2.49968	69	2.64412	65	2.73305	94	1.48638	31	1.89768	55	1.67997	30
ENSMUSG00000027784	Ppm1l	46.8269	49.8413	42.8076	1.15807	0.211719	0.0429037	0.770887	3	69316861	69560802	1	protein_coding	protein phosphatase 1 (formerly 2C)-like [Source:MGI Symbol;Acc:MGI:2139740]	ENSMUST00000029355,ENSMUST00000128637,ENSMUST00000134037,ENSMUST00000193662	50.5487	1441	48.0735	1327	47.7975	1175	52.9457	1821	44.4956	928	43.8881	1272	40.0392	715
ENSMUSG00000017386	Traf4	79.9951	75.9838	85.3435	-1.14302	-0.19285	0.042933	0.770887	11	78158499	78165589	-1	protein_coding	TNF receptor associated factor 4 [Source:MGI Symbol;Acc:MGI:1202880]	ENSMUST00000017530,ENSMUST00000148218,ENSMUST00000149437	80.3657	2291	70.8242	1955	77.2083	1898	75.537	2598	93.1147	1942	78.8054	2284	84.1104	1502
ENSMUSG00000041058	Wwp1	74.6765	79.3158	68.4907	1.1329	0.180023	0.0430083	0.770887	4	19608303	19708993	-1	protein_coding	WW domain containing E3 ubiquitin protein ligase 1 [Source:MGI Symbol;Acc:MGI:1861728]	ENSMUST00000035982,ENSMUST00000108246	84.7155	2415	78.5405	2168	76.8422	1889	77.1652	2654	63.7226	1329	72.8708	2112	68.8787	1230
ENSMUSG00000032400	Zwilch	41.3441	43.6111	38.3213	1.15562	0.208673	0.0430561	0.770887	9	64137144	64173104	-1	protein_coding	zwilch kinetochore protein [Source:MGI Symbol;Acc:MGI:1915264]	ENSMUST00000122091,ENSMUST00000124301,ENSMUST00000130127,ENSMUST00000138075,ENSMUST00000143421,ENSMUST00000148428,ENSMUST00000151428,ENSMUST00000152824,ENSMUST00000176299,ENSMUST00000176378,ENSMUST00000176794,ENSMUST00000176848,ENSMUST00000177045	41.3931	1180	47.3127	1306	41.7771	1027	43.9615	1512	37.5431	783	38.7816	1124	38.6393	690
ENSMUSG00000074264	Amy1	1.19987	0.916214	1.57807	-1.80167	-0.849336	0.0430654	0.770887	3	113555710	113606699	-1	protein_coding	amylase 1, salivary [Source:MGI Symbol;Acc:MGI:88019]	ENSMUST00000067980,ENSMUST00000106540,ENSMUST00000142505,ENSMUST00000172885,ENSMUST00000174147	0.806814	23	0.579635	16	1.66783	41	0.610576	21	1.29459	27	1.75966	51	1.67997	30
ENSMUSG00000028843	Sh3bgrl3	45.8013	42.9267	49.6341	-1.15627	-0.209482	0.0432852	0.772594	4	134127406	134128789	-1	protein_coding	SH3 domain binding glutamic acid-rich protein-like 3 [Source:MGI Symbol;Acc:MGI:1920973]	ENSMUST00000030651,ENSMUST00000105879,ENSMUST00000136408	43.1821	1231	44.4508	1227	44.0958	1084	39.9782	1375	54.3249	1133	45.1302	1308	49.4471	883
ENSMUSG00000022562	Oplah	42.1717	40.0493	45.0016	-1.16656	-0.222255	0.0434424	0.772594	15	76296601	76328015	-1	protein_coding	5-oxoprolinase (ATP-hydrolysing) [Source:MGI Symbol;Acc:MGI:1922725]	ENSMUST00000023222,ENSMUST00000163127,ENSMUST00000163977,ENSMUST00000164189,ENSMUST00000165279,ENSMUST00000169664,ENSMUST00000170063,ENSMUST00000170261,ENSMUST00000171340,ENSMUST00000210024,ENSMUST00000230735	44.6905	1274	37.1329	1025	37.4651	921	40.9086	1407	50.0575	1044	43.06	1248	41.8872	748
ENSMUSG00000116692	Gm49795	1.71457	1.43939	2.08148	-1.61894	-0.695049	0.043456	0.772594	17	27353861	27354668	-1	lncRNA	predicted gene, 49795 [Source:MGI Symbol;Acc:MGI:6215325]	ENSMUST00000231851	1.89426	54	1.81136	50	1.17968	29	0.872252	30	2.54123	53	2.41523	70	1.28798	23
ENSMUSG00000027520	Zdbf2	45.3394	48.9743	40.493	1.15697	0.210357	0.0434568	0.772594	1	63273265	63314576	1	protein_coding	zinc finger, DBF-type containing 2 [Source:MGI Symbol;Acc:MGI:1921134]	ENSMUST00000029025,ENSMUST00000114132,ENSMUST00000126932	55.0037	1568	46.4795	1283	42.6313	1048	51.7827	1781	37.7829	788	41.4729	1202	42.2232	754
ENSMUSG00000017548	Suz12	90.4171	94.427	85.0706	1.13143	0.178143	0.0434591	0.772594	11	79993106	80034123	1	protein_coding	SUZ12 polycomb repressive complex 2 subunit [Source:MGI Symbol;Acc:MGI:1261758]	ENSMUST00000017692,ENSMUST00000126091,ENSMUST00000132312,ENSMUST00000144188,ENSMUST00000148140,ENSMUST00000163272	89.3108	2546	95.8934	2647	93.3577	2295	99.1459	3410	77.6755	1620	89.6739	2599	87.8623	1569
ENSMUSG00000002504	Slc9a3r2	66.911	70.2281	62.4882	1.14606	0.196676	0.0435326	0.772594	17	24639286	24650327	-1	protein_coding	solute carrier family 9 (sodium/hydrogen exchanger), member 3 regulator 2 [Source:MGI Symbol;Acc:MGI:1890662]	ENSMUST00000002572,ENSMUST00000019684,ENSMUST00000234121,ENSMUST00000234505,ENSMUST00000234557,ENSMUST00000234912,ENSMUST00000235042	66.1938	1887	66.5493	1837	76.7608	1887	71.4083	2456	67.6064	1410	62.3473	1807	57.5109	1027
ENSMUSG00000006731	B4galnt1	1.94094	1.52655	2.49347	-1.60339	-0.681125	0.0435567	0.772594	10	127165225	127172330	1	protein_coding	beta-1,4-N-acetyl-galactosaminyl transferase 1 [Source:MGI Symbol;Acc:MGI:1342057]	ENSMUST00000006914,ENSMUST00000217678,ENSMUST00000218977,ENSMUST00000219523,ENSMUST00000220055	1.40315	40	1.88381	52	1.62715	40	1.19208	41	2.1097	44	2.79476	81	2.57595	46
ENSMUSG00000116815	Gm49760	8.10513	8.96147	6.96335	1.32249	0.403261	0.0436769	0.772594	12	18648214	18649998	1	processed_pseudogene	predicted gene, 49760 [Source:MGI Symbol;Acc:MGI:6215265]	ENSMUST00000232086	8.20846	234	10.0349	277	8.29847	204	9.30402	320	5.99348	125	7.72872	224	7.16787	128
ENSMUSG00000021130	Galnt16	21.4822	24.4199	17.5653	1.19904	0.261884	0.0436931	0.772594	12	80518277	80630972	1	protein_coding	polypeptide N-acetylgalactosaminyltransferase 16 [Source:MGI Symbol;Acc:MGI:1917754]	ENSMUST00000021558,ENSMUST00000217926,ENSMUST00000218648,ENSMUST00000218943,ENSMUST00000219267,ENSMUST00000219993	34.3422	979	18.5483	512	24.0005	590	20.7887	715	16.0625	335	18.7698	544	17.8637	319
ENSMUSG00000107120	Gm43059	0.960451	1.12931	0.735305	1.78476	0.835728	0.0437163	0.772594	5	31461022	31462409	1	TEC	predicted gene 43059 [Source:MGI Symbol;Acc:MGI:5663196]	ENSMUST00000202437	0.666499	19	1.63022	45	1.26104	31	0.959477	33	1.05485	22	0.759071	22	0.391993	7
ENSMUSG00000049409	Prokr1	2.13129	2.47372	1.67472	1.58466	0.664173	0.0437426	0.772594	6	87578591	87590743	-1	protein_coding	prokineticin receptor 1 [Source:MGI Symbol;Acc:MGI:1929676]	ENSMUST00000050887,ENSMUST00000203636,ENSMUST00000204682	2.24505	64	2.02872	56	3.09159	76	2.52953	87	0.958956	20	2.55324	74	1.51197	27
ENSMUSG00000023036	Pcdhgc4	29.8254	24.3735	37.0946	-1.30754	-0.386859	0.0437901	0.772594	18	37815079	37841873	1	protein_coding	protocadherin gamma subfamily C, 4 [Source:MGI Symbol;Acc:MGI:1935203]	ENSMUST00000066140,ENSMUST00000193222,ENSMUST00000195239	14.3823	410	32.8581	907	26.4412	650	23.8125	819	29.8715	623	30.3973	881	51.015	911
ENSMUSG00000047139	Cd24a	212.236	231.759	186.205	1.15122	0.203159	0.0439979	0.7741	10	43578284	43584265	1	protein_coding	CD24a antigen [Source:MGI Symbol;Acc:MGI:88323]	ENSMUST00000058714,ENSMUST00000214476,ENSMUST00000214532	283.437	8080	200.3	5529	236.954	5825	206.346	7097	171.174	3570	190.044	5508	197.396	3525
ENSMUSG00000106634	Gm43042	6.48698	7.25324	5.46531	1.32039	0.400962	0.0440524	0.7741	5	59569702	59574242	-1	lncRNA	predicted gene 43042 [Source:MGI Symbol;Acc:MGI:5663179]	ENSMUST00000198676	7.33148	209	8.2598	228	8.01372	197	5.40796	186	6.04142	126	6.21058	180	4.14392	74
ENSMUSG00000056124	B4galt6	92.004	95.8716	86.8473	1.12567	0.170789	0.0440711	0.7741	18	20684599	20746404	-1	protein_coding	UDP-Gal:betaGlcNAc beta 1,4-galactosyltransferase, polypeptide 6 [Source:MGI Symbol;Acc:MGI:1928380]	ENSMUST00000070080	90.1527	2570	100.313	2769	94.2527	2317	98.7679	3397	88.9432	1855	88.3283	2560	83.2704	1487
ENSMUSG00000038366	Lasp1	156.251	148.888	166.069	-1.14738	-0.19834	0.0441175	0.7741	11	97799000	97838764	1	protein_coding	LIM and SH3 protein 1 [Source:MGI Symbol;Acc:MGI:109656]	ENSMUST00000043843,ENSMUST00000107568,ENSMUST00000107569,ENSMUST00000127033,ENSMUST00000127575,ENSMUST00000129558,ENSMUST00000129828,ENSMUST00000134428,ENSMUST00000136723,ENSMUST00000138919,ENSMUST00000143571,ENSMUST00000146572,ENSMUST00000148280,ENSMUST00000152962,ENSMUST00000153520,ENSMUST00000155762	161.608	4607	139.511	3851	153.359	3770	141.072	4852	178.462	3722	162.165	4700	157.581	2814
ENSMUSG00000029843	Slc13a4	6.96957	7.67014	6.03549	1.31921	0.399674	0.0442128	0.7741	6	35267957	35308131	-1	protein_coding	solute carrier family 13 (sodium/sulfate symporters), member 4 [Source:MGI Symbol;Acc:MGI:2442367]	ENSMUST00000031868,ENSMUST00000122829,ENSMUST00000155366	6.87546	196	7.82507	216	8.4205	207	7.55951	260	6.85654	143	5.76204	167	5.4879	98
ENSMUSG00000018411	Mapt	1.70031	1.96402	1.34869	1.63697	0.711026	0.0442142	0.7741	11	104231390	104332090	1	protein_coding	microtubule-associated protein tau [Source:MGI Symbol;Acc:MGI:97180]	ENSMUST00000100347,ENSMUST00000106988,ENSMUST00000106989,ENSMUST00000106992,ENSMUST00000106993,ENSMUST00000126820,ENSMUST00000132245,ENSMUST00000132977,ENSMUST00000138384,ENSMUST00000144836,ENSMUST00000145227,ENSMUST00000146353	1.1576	33	1.44909	40	2.40005	59	2.84936	98	1.0069	21	1.86317	54	1.17598	21
ENSMUSG00000063268	Parp10	4.11196	3.56582	4.84014	-1.39885	-0.484246	0.044283	0.7741	15	76231174	76243441	-1	protein_coding	poly (ADP-ribose) polymerase family, member 10 [Source:MGI Symbol;Acc:MGI:3712326]	ENSMUST00000075689,ENSMUST00000165738,ENSMUST00000166151,ENSMUST00000169255,ENSMUST00000170226,ENSMUST00000170851	3.85868	110	3.40536	94	3.13226	77	3.86698	133	4.55504	95	5.03747	146	4.92791	88
ENSMUSG00000000753	Serpinf1	60.275	56.7526	64.9715	-1.17687	-0.23495	0.0442958	0.7741	11	75409769	75422701	-1	protein_coding	serine (or cysteine) peptidase inhibitor, clade F, member 1 [Source:MGI Symbol;Acc:MGI:108080]	ENSMUST00000000769,ENSMUST00000125982,ENSMUST00000137103,ENSMUST00000138661,ENSMUST00000139403,ENSMUST00000155009,ENSMUST00000167281,ENSMUST00000168902	62.0896	1770	51.2252	1414	62.1165	1527	51.5791	1774	76.8124	1602	59.8631	1735	58.2389	1040
ENSMUSG00000036019	Tmtc2	28.3852	27.1213	30.0705	-1.17629	-0.234247	0.0445873	0.778271	10	105187663	105574451	-1	protein_coding	transmembrane and tetratricopeptide repeat containing 2 [Source:MGI Symbol;Acc:MGI:1914057]	ENSMUST00000061506,ENSMUST00000130665,ENSMUST00000133441,ENSMUST00000139741,ENSMUST00000143691,ENSMUST00000147997	31.6762	903	23.8737	659	25.3429	623	27.5922	949	29.5359	616	30.6044	887	30.0714	537
ENSMUSG00000001052	Sec24b	123.98	117.875	132.119	-1.13962	-0.188559	0.0448853	0.782511	3	129982759	130061553	-1	protein_coding	Sec24 related gene family, member B (S. cerevisiae) [Source:MGI Symbol;Acc:MGI:2139764]	ENSMUST00000001079,ENSMUST00000164758,ENSMUST00000165873,ENSMUST00000165889,ENSMUST00000168644,ENSMUST00000168675,ENSMUST00000168908,ENSMUST00000170163,ENSMUST00000172324	124.039	3536	113.21	3125	115.162	2831	119.091	4096	140.967	2940	126.144	3656	129.246	2308
ENSMUSG00000025737	Wdr24	24.0002	22.7289	25.6954	-1.18987	-0.250801	0.0449825	0.782511	17	25823627	25828730	1	protein_coding	WD repeat domain 24 [Source:MGI Symbol;Acc:MGI:2446285]	ENSMUST00000026833,ENSMUST00000160275,ENSMUST00000160349,ENSMUST00000160829	26.239	748	21.0842	582	22.4547	552	21.1376	727	27.8577	581	25.4289	737	23.7996	425
ENSMUSG00000034422	Parp14	1.20932	0.950236	1.55477	-1.84882	-0.886608	0.0450015	0.782511	16	35832874	35871544	-1	protein_coding	poly (ADP-ribose) polymerase family, member 14 [Source:MGI Symbol;Acc:MGI:1919489]	ENSMUST00000042665,ENSMUST00000135669,ENSMUST00000142946	0.94713	27	1.70268	47	0.366109	9	0.785026	27	1.63023	34	1.24212	36	1.79197	32
ENSMUSG00000061665	Cd2ap	65.9341	69.21	61.5663	1.13869	0.187372	0.0450793	0.782511	17	42792951	42876665	-1	protein_coding	CD2-associated protein [Source:MGI Symbol;Acc:MGI:1330281]	ENSMUST00000024709,ENSMUST00000233123,ENSMUST00000233195,ENSMUST00000233350,ENSMUST00000233476,ENSMUST00000233626	66.8253	1905	71.9472	1986	69.2759	1703	68.7916	2366	56.5305	1179	66.6257	1931	61.5428	1099
ENSMUSG00000027522	Stx16	66.3327	68.8447	62.9833	1.12917	0.175265	0.0450959	0.782511	2	174076308	174099771	1	protein_coding	syntaxin 16 [Source:MGI Symbol;Acc:MGI:1923396]	ENSMUST00000044638,ENSMUST00000087908,ENSMUST00000134876,ENSMUST00000147038,ENSMUST00000155000,ENSMUST00000156054	62.0545	1769	73.2514	2022	70.4963	1733	69.5766	2393	64.0103	1335	60.9327	1766	64.0068	1143
ENSMUSG00000028111	Ctsk	5.99731	5.26666	6.97151	-1.36808	-0.452148	0.0451831	0.783103	3	95499256	95509362	1	protein_coding	cathepsin K [Source:MGI Symbol;Acc:MGI:107823]	ENSMUST00000015664	5.6477	161	5.36162	148	4.06788	100	5.98946	206	7.38396	154	7.31468	212	6.21588	111
ENSMUSG00000070858	Gm1673	7.43184	6.53612	8.62614	-1.33105	-0.412568	0.0452711	0.783706	5	33983433	33985013	1	protein_coding	predicted gene 1673 [Source:MGI Symbol;Acc:MGI:2686519]	ENSMUST00000094869,ENSMUST00000114382,ENSMUST00000114383,ENSMUST00000142510,ENSMUST00000206020	6.66499	190	5.94126	164	7.60693	187	5.93131	204	9.30188	194	7.72872	224	8.84783	158
ENSMUSG00000020019	Ntn4	20.8081	22.8983	18.0211	1.21861	0.28524	0.0455944	0.786725	10	93640681	93747207	1	protein_coding	netrin 4 [Source:MGI Symbol;Acc:MGI:1888978]	ENSMUST00000020204,ENSMUST00000147080	25.5023	727	18.9468	523	24.0005	590	23.1437	796	18.9394	395	17.1481	497	17.9757	321
ENSMUSG00000028497	Hacd4	17.0923	18.7107	14.9344	1.21338	0.279028	0.0456019	0.786725	4	88396144	88438928	-1	protein_coding	3-hydroxyacyl-CoA dehydratase 4 [Source:MGI Symbol;Acc:MGI:1914025]	ENSMUST00000030221,ENSMUST00000132493,ENSMUST00000151280	20.1704	575	18.3672	507	14.8477	365	21.4574	738	14.3364	299	13.3873	388	17.0797	305
ENSMUSG00000058672	Tubb2a	154.279	146.135	165.138	-1.15737	-0.210846	0.0456057	0.786725	13	34074274	34078007	-1	protein_coding	tubulin, beta 2A class IIA [Source:MGI Symbol;Acc:MGI:107861]	ENSMUST00000056427	158.065	4506	137.156	3786	147.257	3620	142.061	4886	178.51	3723	144.707	4194	172.197	3075
ENSMUSG00000027869	Hsd3b6	5.44954	5.88942	4.86303	1.36164	0.445343	0.0457396	0.788111	3	98805504	98814443	-1	protein_coding	hydroxy-delta-5-steroid dehydrogenase, 3 beta- and steroid delta-isomerase 6 [Source:MGI Symbol;Acc:MGI:109598]	ENSMUST00000029463,ENSMUST00000170847,ENSMUST00000196706	3.50789	100	5.25294	145	3.66109	90	11.1357	383	3.26045	68	3.2088	93	8.11985	145
ENSMUSG00000041079	Rwdd2b	9.27733	10.0409	8.2592	1.27612	0.35176	0.0458824	0.788117	16	87433407	87440573	-1	protein_coding	RWD domain containing 2B [Source:MGI Symbol;Acc:MGI:1858215]	ENSMUST00000039101,ENSMUST00000152430,ENSMUST00000231843	8.34877	238	11.8463	327	9.15272	225	10.8159	372	8.29497	173	8.41879	244	8.06385	144
ENSMUSG00000038077	Kcna6	14.0092	12.6273	15.8518	-1.3247	-0.405667	0.0458927	0.788117	6	126708329	126740674	-1	protein_coding	potassium voltage-gated channel, shaker-related, subfamily, member 6 [Source:MGI Symbol;Acc:MGI:96663]	ENSMUST00000040751,ENSMUST00000112242,ENSMUST00000128137,ENSMUST00000185333	14.7331	420	9.27416	256	13.7087	337	12.793	440	19.6107	409	15.0089	435	12.9358	231
ENSMUSG00000023800	Tiam2	8.69054	9.64986	7.41146	1.28756	0.364643	0.0459004	0.788117	17	3326573	3531344	1	protein_coding	T cell lymphoma invasion and metastasis 2 [Source:MGI Symbol;Acc:MGI:1344338]	ENSMUST00000072156,ENSMUST00000169838,ENSMUST00000226434,ENSMUST00000226748,ENSMUST00000226905,ENSMUST00000226913,ENSMUST00000226997,ENSMUST00000227405,ENSMUST00000227604	9.92732	283	9.56398	264	8.99001	221	10.1181	348	7.09628	148	7.97025	231	7.16787	128
ENSMUSG00000037235	Mxd4	87.3958	82.4306	94.0161	-1.13322	-0.180433	0.0461089	0.788996	5	34173883	34187720	-1	protein_coding	Max dimerization protein 4 [Source:MGI Symbol;Acc:MGI:104991]	ENSMUST00000042701,ENSMUST00000119171,ENSMUST00000201189,ENSMUST00000201763	80.5762	2297	76.8379	2121	84.3271	2073	87.9811	3026	96.0395	2003	96.2985	2791	89.7103	1602
ENSMUSG00000031112	Stk26	49.9643	53.2597	45.5706	1.20678	0.271163	0.0461206	0.788996	X	50841047	50893097	1	protein_coding	serine/threonine kinase 26 [Source:MGI Symbol;Acc:MGI:1917665]	ENSMUST00000033444,ENSMUST00000114887,ENSMUST00000136741,ENSMUST00000146956	46.234	1318	61.9123	1709	42.8754	1054	62.0171	2133	40.42	843	48.5805	1408	47.7111	852
ENSMUSG00000032125	Robo4	6.30687	5.55823	7.30506	-1.33585	-0.417759	0.0461433	0.788996	9	37401897	37415115	1	protein_coding	roundabout guidance receptor 4 [Source:MGI Symbol;Acc:MGI:1921394]	ENSMUST00000102895,ENSMUST00000115046,ENSMUST00000115048,ENSMUST00000156972,ENSMUST00000214185,ENSMUST00000215777	5.85817	167	5.90503	163	4.80009	118	5.66964	195	8.19908	171	7.55621	219	6.15988	110
ENSMUSG00000042804	Gpr153	57.3707	54.0215	61.8363	-1.17932	-0.237951	0.0461913	0.788996	4	152274232	152285337	1	protein_coding	G protein-coupled receptor 153 [Source:MGI Symbol;Acc:MGI:1916157]	ENSMUST00000055754,ENSMUST00000105650,ENSMUST00000105651,ENSMUST00000144035	58.722	1674	45.2115	1248	56.7062	1394	55.4461	1907	69.6202	1452	57.0338	1653	58.8549	1051
ENSMUSG00000044164	Rnf182	3.33286	3.82582	2.67559	1.44635	0.532414	0.0462976	0.788996	13	43615710	43670945	1	protein_coding	ring finger protein 182 [Source:MGI Symbol;Acc:MGI:3045355]	ENSMUST00000059986,ENSMUST00000161817	3.75344	107	3.7314	103	4.27127	105	3.54716	122	3.16456	66	2.62225	76	2.23996	40
ENSMUSG00000053475	Tnfaip6	4.7368	4.43999	5.13254	-1.38441	-0.469276	0.0463246	0.788996	2	52038009	52056686	1	protein_coding	tumor necrosis factor alpha induced protein 6 [Source:MGI Symbol;Acc:MGI:1195266]	ENSMUST00000065927	6.70006	191	3.36913	93	3.8238	94	3.86698	133	5.22631	109	4.34741	126	5.82389	104
ENSMUSG00000020846	Rflnb	24.2934	26.172	21.7885	1.17698	0.235092	0.0463265	0.788996	11	76019194	76027782	-1	protein_coding	refilin B [Source:MGI Symbol;Acc:MGI:1923816]	ENSMUST00000021207	27.8175	793	23.8013	657	24.4886	602	28.5808	983	21.145	441	19.8049	574	24.4155	436
ENSMUSG00000044519	Zfp488	2.87282	2.28823	3.65229	-1.46621	-0.552096	0.0465346	0.791626	14	33967070	33978764	-1	protein_coding	zinc finger protein 488 [Source:MGI Symbol;Acc:MGI:2686052]	ENSMUST00000166737	1.71886	49	2.31854	64	2.64412	65	2.47138	85	3.54814	74	3.2088	93	4.19992	75
ENSMUSG00000054752	Fsd1l	20.6855	22.3344	18.487	1.21242	0.277884	0.0467904	0.795058	4	53631471	53707009	1	protein_coding	fibronectin type III and SPRY domain containing 1-like [Source:MGI Symbol;Acc:MGI:2442443]	ENSMUST00000107643,ENSMUST00000129648,ENSMUST00000132151,ENSMUST00000159415,ENSMUST00000162270,ENSMUST00000163067,ENSMUST00000180164	22.1698	632	23.8013	657	20.7462	510	22.6204	778	16.3982	342	18.7353	543	20.3276	363
ENSMUSG00000024084	Qpct	30.2013	28.9857	31.8221	-1.16972	-0.226163	0.0469494	0.795996	17	79051906	79090378	1	protein_coding	glutaminyl-peptide cyclotransferase (glutaminyl cyclase) [Source:MGI Symbol;Acc:MGI:1917786]	ENSMUST00000040789,ENSMUST00000233899,ENSMUST00000233916	34.237	976	24.5983	679	29.5735	727	27.5341	947	29.5838	617	33.1231	960	32.7594	585
ENSMUSG00000056917	Sipa1	53.1311	50.2759	56.9379	-1.14925	-0.20069	0.046996	0.795996	19	5651185	5663707	-1	protein_coding	signal-induced proliferation associated gene 1 [Source:MGI Symbol;Acc:MGI:107576]	ENSMUST00000071857,ENSMUST00000080824,ENSMUST00000164304,ENSMUST00000169854,ENSMUST00000236006,ENSMUST00000236332,ENSMUST00000236464,ENSMUST00000236486,ENSMUST00000236827,ENSMUST00000237544,ENSMUST00000237874,ENSMUST00000238020,ENSMUST00000238092	52.1272	1486	44.6681	1233	55.8113	1372	48.4972	1668	58.5922	1222	59.4146	1722	52.807	943
ENSMUSG00000063727	Tnfrsf11b	1.11038	0.914624	1.3714	-1.7534	-0.810156	0.0470076	0.795996	15	54250619	54278484	-1	protein_coding	tumor necrosis factor receptor superfamily, member 11b (osteoprotegerin) [Source:MGI Symbol;Acc:MGI:109587]	ENSMUST00000079772	1.36808	39	0.470953	13	0.97629	24	0.843176	29	0.911008	19	2.1392	62	1.06398	19
ENSMUSG00000117098	Gm49909	33.4037	28.4729	39.9782	-1.29423	-0.372089	0.0470797	0.796301	17	70974119	71002208	-1	protein_coding	predicted gene, 49909 [Source:MGI Symbol;Acc:MGI:6270609]	ENSMUST00000233357,ENSMUST00000233417	22.661	646	27.8587	769	35.838	881	27.5341	947	45.2148	943	28.0166	812	46.7031	834
ENSMUSG00000019944	Rhobtb1	72.6944	76.5513	67.5519	1.14921	0.200645	0.0471595	0.796735	10	69151434	69291791	1	protein_coding	Rho-related BTB domain containing 1 [Source:MGI Symbol;Acc:MGI:1916538]	ENSMUST00000020101,ENSMUST00000067908,ENSMUST00000163497,ENSMUST00000163760,ENSMUST00000164034,ENSMUST00000164212,ENSMUST00000164876,ENSMUST00000165765,ENSMUST00000167286,ENSMUST00000167384,ENSMUST00000168117,ENSMUST00000169569,ENSMUST00000172261	73.7007	2101	74.8091	2065	83.7576	2059	73.9379	2543	67.1749	1401	61.4502	1781	74.0306	1322
ENSMUSG00000031189	Aff2	14.1257	13.3457	15.1659	-1.25957	-0.33293	0.0472216	0.796872	X	69360294	69868037	1	protein_coding	AF4/FMR2 family, member 2 [Source:MGI Symbol;Acc:MGI:1202294]	ENSMUST00000033532,ENSMUST00000139977,ENSMUST00000143097,ENSMUST00000151662	16.8379	480	9.6002	265	12.407	305	14.5375	500	15.2474	318	15.8025	458	14.4477	258
ENSMUSG00000034118	Tpst1	30.1406	28.6984	32.0634	-1.16938	-0.225746	0.0473333	0.797156	5	130073326	130135729	1	protein_coding	protein-tyrosine sulfotransferase 1 [Source:MGI Symbol;Acc:MGI:1298231]	ENSMUST00000040721,ENSMUST00000118993,ENSMUST00000128335,ENSMUST00000142838	32.5181	927	26.3009	726	27.9463	687	28.0283	964	31.8373	664	32.8816	953	31.4714	562
ENSMUSG00000059743	Fdps	72.5657	68.6034	77.8487	-1.12853	-0.174449	0.0473467	0.797156	3	89093588	89101959	-1	protein_coding	farnesyl diphosphate synthetase [Source:MGI Symbol;Acc:MGI:104888]	ENSMUST00000081848,ENSMUST00000196254,ENSMUST00000196709,ENSMUST00000196921,ENSMUST00000198239,ENSMUST00000199668,ENSMUST00000200433	67.4216	1922	70.8966	1957	70.6183	1736	65.477	2252	74.7506	1559	80.565	2335	78.2305	1397
ENSMUSG00000085006	BC021767	1.97994	1.62178	2.45749	-1.57607	-0.65633	0.0474528	0.797302	3	94661830	94670696	-1	transcribed_unprocessed_pseudogene	cDNA sequence BC021767 [Source:MGI Symbol;Acc:MGI:3615512]	ENSMUST00000126387,ENSMUST00000136988	1.71886	49	1.594	44	1.13901	28	2.03525	70	2.49329	52	2.41523	70	2.46395	44
ENSMUSG00000074676	Foxs1	1.05437	1.3402	0.673266	1.81162	0.857281	0.0475634	0.797302	2	152931898	152933208	-1	protein_coding	forkhead box S1 [Source:MGI Symbol;Acc:MGI:95546]	ENSMUST00000099200	1.85918	53	0.833225	23	1.09833	27	1.57005	54	0.239739	5	0.828077	24	0.951982	17
ENSMUSG00000025085	Ablim1	81.6798	84.1934	78.3283	1.12278	0.16707	0.0477601	0.797302	19	57032733	57314919	-1	protein_coding	actin-binding LIM protein 1 [Source:MGI Symbol;Acc:MGI:1194500]	ENSMUST00000079360,ENSMUST00000099294,ENSMUST00000104902,ENSMUST00000111524,ENSMUST00000111526,ENSMUST00000111528,ENSMUST00000111529,ENSMUST00000111544,ENSMUST00000111546,ENSMUST00000111550,ENSMUST00000111555,ENSMUST00000111558,ENSMUST00000111559,ENSMUST00000127198,ENSMUST00000128212,ENSMUST00000133369,ENSMUST00000133782,ENSMUST00000134430,ENSMUST00000137389,ENSMUST00000150425,ENSMUST00000156316	72.929	2079	89.1913	2462	90.7136	2230	83.9397	2887	77.5316	1617	81.9107	2374	75.5426	1349
ENSMUSG00000108484	Gm18537	1.82314	1.61245	2.10407	-1.60669	-0.684089	0.0477962	0.797302	6	83548859	83550381	-1	transcribed_processed_pseudogene	predicted gene, 18537 [Source:MGI Symbol;Acc:MGI:5010722]	ENSMUST00000205709,ENSMUST00000206215,ENSMUST00000206792	2.4906	71	0.941907	26	1.09833	27	1.91895	66	1.34254	28	2.44973	71	2.51995	45
ENSMUSG00000078898	Zfp968	1.76283	2.02647	1.41131	1.60164	0.679549	0.0478073	0.797302	2	175372436	175384201	1	protein_coding	zinc finger protein 968 [Source:MGI Symbol;Acc:MGI:3782903]	ENSMUST00000109047,ENSMUST00000109048,ENSMUST00000131676	1.50839	43	2.64458	73	2.03394	50	1.91895	66	2.01381	42	1.38013	40	0.839984	15
ENSMUSG00000055639	Dach1	19.6895	21.4124	17.3923	1.20003	0.263065	0.0478253	0.797302	14	97786853	98169765	-1	protein_coding	dachshund family transcription factor 1 [Source:MGI Symbol;Acc:MGI:1277991]	ENSMUST00000069334,ENSMUST00000071533,ENSMUST00000156684	22.9767	655	21.1567	584	22.2106	546	19.3058	664	17.0694	356	17.8037	516	17.3037	309
ENSMUSG00000033174	Mgll	9.77843	10.7614	8.46785	1.26707	0.341501	0.047832	0.797302	6	88724412	88828360	1	protein_coding	monoglyceride lipase [Source:MGI Symbol;Acc:MGI:1346042]	ENSMUST00000089449,ENSMUST00000113581,ENSMUST00000113582,ENSMUST00000113585,ENSMUST00000150180,ENSMUST00000151699,ENSMUST00000163271,ENSMUST00000203608,ENSMUST00000203824,ENSMUST00000205045	10.9095	311	10.7957	298	10.2917	253	11.0485	380	9.20598	192	7.79773	226	8.39984	150
ENSMUSG00000056602	Fry	171.633	186.148	152.278	1.19273	0.254264	0.04784	0.797302	5	150118645	150497753	1	protein_coding	FRY microtubule binding protein [Source:MGI Symbol;Acc:MGI:2443895]	ENSMUST00000087204,ENSMUST00000200750,ENSMUST00000200863,ENSMUST00000200960,ENSMUST00000200964,ENSMUST00000201196,ENSMUST00000201628,ENSMUST00000201634,ENSMUST00000201854,ENSMUST00000202070,ENSMUST00000202530,ENSMUST00000202566,ENSMUST00000202571,ENSMUST00000202600,ENSMUST00000202630,ENSMUST00000202841,ENSMUST00000203000,ENSMUST00000239118	199.423	5685	155.125	4282	202.743	4984	187.301	6442	174.338	3636	143.395	4156	139.101	2484
ENSMUSG00000084353	Gm15452	1.64263	1.99435	1.17368	2.23084	1.15758	0.0478695	0.797302	1	8791923	8792162	-1	processed_pseudogene	predicted gene 15452 [Source:MGI Symbol;Acc:MGI:3768636]	ENSMUST00000119877	2.66599	76	2.1374	59	1.54579	38	1.6282	56	0.863061	18	0.138013	4	2.51995	45
ENSMUSG00000048039	Isg20l2	48.0097	50.1129	45.2054	1.14288	0.192668	0.0478965	0.797302	3	87930314	87940686	1	protein_coding	interferon stimulated exonuclease gene 20-like 2 [Source:MGI Symbol;Acc:MGI:2140076]	ENSMUST00000055984	45.5324	1298	51.5151	1422	51.6213	1269	51.7827	1781	43.6325	910	44.8887	1301	47.0951	841
ENSMUSG00000042599	Kdm7a	30.5153	32.4058	27.9946	1.16764	0.223595	0.0481207	0.799952	6	39136623	39206789	-1	protein_coding	lysine (K)-specific demethylase 7A [Source:MGI Symbol;Acc:MGI:2443388]	ENSMUST00000002305,ENSMUST00000127036	31.6061	901	32.532	898	32.543	800	32.942	1133	27.3782	571	27.4301	795	29.1755	521
ENSMUSG00000032679	Cd59a	19.435	20.5153	17.9947	1.22668	0.294761	0.0482023	0.799952	2	104095801	104115354	1	protein_coding	CD59a antigen [Source:MGI Symbol;Acc:MGI:109177]	ENSMUST00000040423,ENSMUST00000153312,ENSMUST00000168176	16.2415	463	24.7794	684	21.3563	525	19.6838	677	17.5968	367	21.7715	631	14.6157	261
ENSMUSG00000106044	Gm42860	202.51	215.094	185.731	1.15304	0.205446	0.0482187	0.799952	5	60803716	60807706	-1	TEC	predicted gene 42860 [Source:MGI Symbol;Acc:MGI:5662997]	ENSMUST00000196492	219.874	6268	197.656	5456	209.78	5157	233.066	8016	161.105	3360	208.883	6054	187.204	3343
ENSMUSG00000025743	Sdc3	208.423	196.469	224.361	-1.17879	-0.237303	0.0483466	0.801173	4	130792537	130826319	1	protein_coding	syndecan 3 [Source:MGI Symbol;Acc:MGI:1349163]	ENSMUST00000070478,ENSMUST00000140623,ENSMUST00000141297,ENSMUST00000146093,ENSMUST00000152591	214.437	6113	166.428	4594	204.655	5031	200.356	6891	249.616	5206	212.574	6161	210.892	3766
ENSMUSG00000026840	Lamc3	9.01368	10.0391	7.6464	1.28457	0.361289	0.0485083	0.802949	2	31887291	31946539	1	protein_coding	laminin gamma 3 [Source:MGI Symbol;Acc:MGI:1344394]	ENSMUST00000028187,ENSMUST00000135995,ENSMUST00000138325	10.4886	299	8.51339	235	9.64087	237	11.5137	396	7.28807	152	8.31528	241	7.33586	131
ENSMUSG00000044365	Cxxc4	16.5487	17.8981	14.7495	1.21608	0.282238	0.048604	0.803629	3	134236484	134262161	1	protein_coding	CXXC finger 4 [Source:MGI Symbol;Acc:MGI:2442112]	ENSMUST00000166288,ENSMUST00000181597,ENSMUST00000181904,ENSMUST00000197151,ENSMUST00000199134	17.8902	510	17.9687	496	17.5325	431	18.201	626	13.0898	273	15.4229	447	15.7357	281
ENSMUSG00000102697	Pcdhac2	5.26583	5.9484	4.35573	1.3721	0.45639	0.048824	0.806363	18	37143503	37187657	1	protein_coding	protocadherin alpha subfamily C, 2 [Source:MGI Symbol;Acc:MGI:1891443]	ENSMUST00000047479	5.99849	171	5.65144	156	5.97978	147	6.16391	212	4.79478	100	4.96846	144	3.30394	59
ENSMUSG00000089945	Pakap	135.067	141.776	126.121	1.18565	0.245674	0.0489016	0.806739	4	57568179	57896982	1	protein_coding	paralemmin A kinase anchor protein [Source:MGI Symbol;Acc:MGI:5141924]	ENSMUST00000098066,ENSMUST00000126465,ENSMUST00000150412	120.391	3432	135.055	3728	165.237	4062	146.422	5036	147.008	3066	109.444	3172	121.91	2177
ENSMUSG00000057098	Ebf1	19.5748	17.8243	21.9088	-1.22739	-0.295593	0.0491762	0.808843	11	44617317	45008091	1	protein_coding	early B cell factor 1 [Source:MGI Symbol;Acc:MGI:95275]	ENSMUST00000081265,ENSMUST00000101326,ENSMUST00000109268,ENSMUST00000135993,ENSMUST00000138452,ENSMUST00000140822,ENSMUST00000149997	18.2761	521	18.5483	512	16.0681	395	18.4045	633	26.8028	559	21.116	612	17.8077	318
ENSMUSG00000008036	Ap2s1	78.7793	74.102	85.0158	-1.1288	-0.174794	0.0491835	0.808843	7	16738410	16749294	1	protein_coding	adaptor-related protein complex 2, sigma 1 subunit [Source:MGI Symbol;Acc:MGI:2141861]	ENSMUST00000086112,ENSMUST00000141496,ENSMUST00000205590,ENSMUST00000205607,ENSMUST00000205673	70.1928	2001	81.5112	2250	76.0286	1869	68.6753	2362	89.5665	1868	80.5305	2334	84.9504	1517
ENSMUSG00000053846	Lipg	4.10516	4.60698	3.43606	1.39038	0.475481	0.0491938	0.808843	18	74939322	74961263	-1	protein_coding	lipase, endothelial [Source:MGI Symbol;Acc:MGI:1341803]	ENSMUST00000066532,ENSMUST00000235783	4.24454	121	5.28917	146	4.27127	105	4.62293	159	4.12351	86	2.65675	77	3.52793	63
ENSMUSG00000107191	Gm43579	1.42981	1.00601	1.99488	-1.7789	-0.830983	0.0493166	0.809822	5	120626315	120627621	-1	lncRNA	predicted gene 43579 [Source:MGI Symbol;Acc:MGI:5663716]	ENSMUST00000202387	0.841893	24	1.15927	32	1.17968	29	0.843176	29	2.2056	46	1.0351	30	2.74395	49
ENSMUSG00000112324	Gm47939	2.69002	2.00989	3.59687	-1.5962	-0.674646	0.0494348	0.809822	10	25899279	25903916	1	lncRNA	predicted gene, 47939 [Source:MGI Symbol;Acc:MGI:6097203]	ENSMUST00000219283	1.26284	36	2.9344	81	2.15597	53	1.68635	58	2.49329	52	4.20939	122	4.08792	73
ENSMUSG00000038665	Dgki	2.02869	2.34527	1.60659	1.57257	0.653121	0.0495166	0.809822	6	36846022	37300184	-1	protein_coding	diacylglycerol kinase, iota [Source:MGI Symbol;Acc:MGI:2443430]	ENSMUST00000042075,ENSMUST00000090314,ENSMUST00000101532,ENSMUST00000136457,ENSMUST00000138286,ENSMUST00000143046,ENSMUST00000146656,ENSMUST00000150300	1.78902	51	2.35477	65	3.17294	78	2.06433	71	1.24664	26	1.72516	50	1.84797	33
ENSMUSG00000112449	Srp54b	57.8637	61.6566	52.8065	1.14058	0.189772	0.0495788	0.809822	12	55155104	55189573	1	protein_coding	signal recognition particle 54B [Source:MGI Symbol;Acc:MGI:3714357]	ENSMUST00000110708,ENSMUST00000217670,ENSMUST00000218128,ENSMUST00000218889	66.0886	1884	55.2827	1526	63.0928	1551	62.1625	2138	52.2631	1090	48.9256	1418	57.2309	1022
ENSMUSG00000059898	Dsc3	1.78818	1.6897	1.91949	-1.60637	-0.683805	0.0496085	0.809822	18	19960930	20002351	-1	protein_coding	desmocollin 3 [Source:MGI Symbol;Acc:MGI:1194993]	ENSMUST00000115848,ENSMUST00000223946,ENSMUST00000225110	3.1571	90	0.869453	24	1.22036	30	1.5119	52	1.96586	41	1.55265	45	2.23996	40
ENSMUSG00000015852	Fcrls	6.17869	5.44049	7.16296	-1.35917	-0.442724	0.049611	0.809822	3	87250758	87263738	-1	protein_coding	Fc receptor-like S, scavenger receptor [Source:MGI Symbol;Acc:MGI:1933397]	ENSMUST00000090986,ENSMUST00000146512	5.99849	171	6.04994	167	5.20688	128	4.50663	155	6.90448	144	6.07257	176	8.51184	152
ENSMUSG00000024976	Shoc2	64.5097	67.6621	60.3066	1.12776	0.173458	0.0496601	0.809822	19	53944306	54033133	1	protein_coding	Shoc2, leucine rich repeat scaffold protein [Source:MGI Symbol;Acc:MGI:1927197]	ENSMUST00000025932,ENSMUST00000169861,ENSMUST00000235945,ENSMUST00000236144,ENSMUST00000237296,ENSMUST00000237801,ENSMUST00000237908	66.72	1902	65.5712	1810	71.1065	1748	67.2506	2313	56.3866	1176	63.3824	1837	61.1509	1092
ENSMUSG00000042275	Pelo	36.8173	34.2551	40.2334	-1.16448	-0.219689	0.0496931	0.809822	13	115088355	115090186	-1	protein_coding	pelota mRNA surveillance and ribosome rescue factor [Source:MGI Symbol;Acc:MGI:2145154]	ENSMUST00000109226	33.3249	950	36.5895	1010	34.6583	852	32.4478	1116	39.9885	834	38.7126	1122	41.9992	750
ENSMUSG00000083218	Gm16425	1.10235	0.869414	1.41293	-1.77414	-0.82712	0.0498606	0.810731	8	19535454	19538583	1	processed_pseudogene	predicted gene 16425 [Source:MGI Symbol;Acc:MGI:3643338]	ENSMUST00000118143	1.05237	30	1.12304	31	0.488145	12	0.814101	28	1.67817	35	1.55265	45	1.00798	18
ENSMUSG00000030098	Grip2	15.6008	16.2963	14.6735	1.21263	0.278139	0.0499149	0.810731	6	91761509	91827250	-1	protein_coding	glutamate receptor interacting protein 2 [Source:MGI Symbol;Acc:MGI:2681173]	ENSMUST00000159684,ENSMUST00000161545,ENSMUST00000161566,ENSMUST00000162293,ENSMUST00000162300,ENSMUST00000205964	11.7865	336	19.7076	544	19.6478	483	14.0432	483	15.5351	324	16.8376	488	11.6478	208
ENSMUSG00000042742	Bmt2	53.9605	56.0628	51.1575	1.13418	0.181647	0.0499374	0.810731	6	13625673	13677966	-1	protein_coding	base methyltransferase of 25S rRNA 2 [Source:MGI Symbol;Acc:MGI:2141466]	ENSMUST00000045235,ENSMUST00000203078	50.1628	1430	58.6156	1618	56.6248	1392	58.8479	2024	51.2083	1068	50.4092	1461	51.855	926
ENSMUSG00000034708	Grn	144.679	136.293	155.86	-1.13742	-0.185766	0.049969	0.810731	11	102430315	102437048	1	protein_coding	granulin [Source:MGI Symbol;Acc:MGI:95832]	ENSMUST00000049460,ENSMUST00000123500,ENSMUST00000125819,ENSMUST00000127530,ENSMUST00000129997,ENSMUST00000135517,ENSMUST00000138451,ENSMUST00000148580,ENSMUST00000176953,ENSMUST00000177428	133.405	3803	145.162	4007	126.552	3111	140.055	4817	154.104	3214	155.782	4515	157.693	2816
ENSMUSG00000031375	Bgn	189.064	177.103	205.012	-1.16188	-0.216467	0.05004	0.81099	X	73483602	73495933	1	protein_coding	biglycan [Source:MGI Symbol;Acc:MGI:88158]	ENSMUST00000033741,ENSMUST00000130873,ENSMUST00000133394,ENSMUST00000140803,ENSMUST00000141945,ENSMUST00000155231,ENSMUST00000169489,ENSMUST00000183174	173.079	4934	157.262	4341	159.745	3927	218.325	7509	207.95	4337	196.53	5696	210.556	3760
ENSMUSG00000021109	Hif1a	319.724	337.106	296.548	1.15697	0.210351	0.0502279	0.813139	12	73901375	73947530	1	protein_coding	hypoxia inducible factor 1, alpha subunit [Source:MGI Symbol;Acc:MGI:106918]	ENSMUST00000021530,ENSMUST00000110461,ENSMUST00000110464,ENSMUST00000149740,ENSMUST00000157041	319.919	9120	354.483	9785	333.932	8209	340.091	11697	278.433	5807	313.186	9077	298.026	5322
ENSMUSG00000035493	Tgfbi	614.128	574.279	667.261	-1.22759	-0.295831	0.0503638	0.814255	13	56609523	56639562	1	protein_coding	transforming growth factor, beta induced [Source:MGI Symbol;Acc:MGI:99959]	ENSMUST00000045173,ENSMUST00000223661,ENSMUST00000225300,ENSMUST00000225600,ENSMUST00000226024	676.391	19282	474.83	13107	583.089	14334	562.806	19357	793.488	16549	569.683	16511	638.612	11404
ENSMUSG00000058152	Chsy3	2.53602	2.26066	2.90316	-1.49603	-0.581144	0.0504549	0.814255	18	59175401	59535999	1	protein_coding	chondroitin sulfate synthase 3 [Source:MGI Symbol;Acc:MGI:1926173]	ENSMUST00000080721,ENSMUST00000237594,ENSMUST00000238155	3.22726	92	1.77513	49	1.83054	45	2.2097	76	2.54123	53	3.31231	96	2.85595	51
ENSMUSG00000021466	Ptch1	46.3514	49.7491	41.8211	1.15099	0.202881	0.0504626	0.814255	13	63508328	63573598	-1	protein_coding	patched 1 [Source:MGI Symbol;Acc:MGI:105373]	ENSMUST00000021921,ENSMUST00000192155,ENSMUST00000193953,ENSMUST00000194663,ENSMUST00000195106,ENSMUST00000195258,ENSMUST00000195756,ENSMUST00000220588,ENSMUST00000222040,ENSMUST00000223515	53.9513	1538	40.973	1131	52.4349	1289	51.6373	1776	39.9885	834	44.8197	1299	40.6552	726
ENSMUSG00000041688	Amot	79.901	84.7137	73.484	1.1463	0.196986	0.0505612	0.814954	X	145446425	145505181	-1	protein_coding	angiomotin [Source:MGI Symbol;Acc:MGI:108440]	ENSMUST00000112835,ENSMUST00000112836,ENSMUST00000125271,ENSMUST00000135832,ENSMUST00000138187,ENSMUST00000143610	85.4872	2437	78.1783	2158	79.8524	1963	95.3371	3279	70.4833	1470	80.082	2321	69.8867	1248
ENSMUSG00000106874	Gm20186	11.3115	10.5305	12.3527	-1.27675	-0.35248	0.0506922	0.816172	6	18845910	18848207	-1	lncRNA	predicted gene, 20186 [Source:MGI Symbol;Acc:MGI:5012371]	ENSMUST00000201775,ENSMUST00000202148,ENSMUST00000202542	12.3828	353	9.92625	274	6.87471	169	12.9384	445	11.6034	242	11.4551	332	13.9997	250
ENSMUSG00000036377	C530008M17Rik	89.7956	96.4419	80.9338	1.13114	0.177779	0.050783	0.816741	5	76656512	76873554	1	protein_coding	RIKEN cDNA C530008M17 gene [Source:MGI Symbol;Acc:MGI:2444817]	ENSMUST00000086909,ENSMUST00000120639,ENSMUST00000120818,ENSMUST00000121160,ENSMUST00000121851,ENSMUST00000125922,ENSMUST00000128112,ENSMUST00000149216,ENSMUST00000151567,ENSMUST00000152373,ENSMUST00000163347,ENSMUST00000187287,ENSMUST00000238963	110.674	3155	88.3581	2439	101.371	2492	85.3644	2936	84.9635	1772	79.4954	2304	78.3425	1399
ENSMUSG00000047146	Tet1	29.5294	31.4111	27.0205	1.16916	0.22547	0.0509708	0.817942	10	62804570	62908996	-1	protein_coding	tet methylcytosine dioxygenase 1 [Source:MGI Symbol;Acc:MGI:1098693]	ENSMUST00000050826,ENSMUST00000173081,ENSMUST00000173087,ENSMUST00000173905,ENSMUST00000174121,ENSMUST00000174189,ENSMUST00000218438,ENSMUST00000218782,ENSMUST00000227494,ENSMUST00000228901	30.8694	880	30.7207	848	33.0312	812	31.0231	1067	27.6659	577	26.74	775	26.6555	476
ENSMUSG00000039530	Tusc3	49.9812	46.5959	54.495	-1.17846	-0.236902	0.0509887	0.817942	8	39005845	39165114	1	protein_coding	tumor suppressor candidate 3 [Source:MGI Symbol;Acc:MGI:1933134]	ENSMUST00000167992,ENSMUST00000169034,ENSMUST00000209440,ENSMUST00000209970,ENSMUST00000210890,ENSMUST00000211241	49.4612	1410	46.5519	1285	46.089	1133	44.2813	1523	43.4407	906	66.4532	1926	53.591	957
ENSMUSG00000044338	Aplnr	10.8621	11.94	9.42493	1.2511	0.323202	0.0510242	0.817942	2	85136225	85139923	1	protein_coding	apelin receptor [Source:MGI Symbol;Acc:MGI:1346086]	ENSMUST00000057019,ENSMUST00000184728	12.3478	352	11.6652	322	11.3901	280	12.3569	425	9.58956	200	9.55739	277	9.12783	163
ENSMUSG00000031803	B3gnt3	3.86324	4.23063	3.37337	1.4117	0.49743	0.0511234	0.817982	8	71690756	71701789	-1	protein_coding	UDP-GlcNAc:betaGal beta-1,3-N-acetylglucosaminyltransferase 3 [Source:MGI Symbol;Acc:MGI:2152535]	ENSMUST00000034260	2.77123	79	4.27481	118	4.96281	122	4.91368	169	2.97276	62	4.34741	126	2.79995	50
ENSMUSG00000037221	Mospd3	12.6362	11.6384	13.9666	-1.23928	-0.309502	0.0511378	0.817982	5	137596645	137601058	-1	protein_coding	motile sperm domain containing 3 [Source:MGI Symbol;Acc:MGI:1916179]	ENSMUST00000037620,ENSMUST00000111007,ENSMUST00000126904,ENSMUST00000133705,ENSMUST00000154708,ENSMUST00000196366	12.8038	365	11.6652	322	10.251	252	11.8335	407	15.8228	330	12.9732	376	13.1038	234
ENSMUSG00000062098	Btbd3	37.5542	40.1053	34.1528	1.1557	0.208764	0.0512606	0.818985	2	138256565	138589292	1	protein_coding	BTB (POZ) domain containing 3 [Source:MGI Symbol;Acc:MGI:2385155]	ENSMUST00000075410,ENSMUST00000091556,ENSMUST00000128656,ENSMUST00000155646	41.7439	1190	35.5389	981	42.9568	1056	40.1817	1382	33.8512	706	34.9518	1013	33.6554	601
ENSMUSG00000024268	Celf4	10.0425	9.21886	11.1407	-1.26519	-0.339356	0.0513117	0.818985	18	25477632	25754157	-1	protein_coding	CUGBP, Elav-like family member 4 [Source:MGI Symbol;Acc:MGI:1932407]	ENSMUST00000025117,ENSMUST00000115816,ENSMUST00000223704,ENSMUST00000224028,ENSMUST00000224143,ENSMUST00000224553,ENSMUST00000225477,ENSMUST00000225528,ENSMUST00000225927,ENSMUST00000226091	10.3132	294	9.09302	251	7.52557	185	9.94367	342	11.2677	235	10.7305	311	11.4238	204
ENSMUSG00000112478	Gm47761	27.0188	29.0493	24.3114	1.26902	0.34371	0.0515999	0.820954	10	17318085	17323228	-1	lncRNA	predicted gene, 47761 [Source:MGI Symbol;Acc:MGI:6096912]	ENSMUST00000217920,ENSMUST00000219259	24.029	685	35.5751	982	25.0174	615	31.5755	1086	20.4258	426	30.5009	884	22.0076	393
ENSMUSG00000028194	Ddah1	88.1017	90.1701	85.3439	1.12907	0.175133	0.051622	0.820954	3	145758675	145894277	1	protein_coding	dimethylarginine dimethylaminohydrolase 1 [Source:MGI Symbol;Acc:MGI:1916469]	ENSMUST00000029845,ENSMUST00000120310,ENSMUST00000127193	73.2798	2089	100.712	2780	92.951	2285	93.738	3224	98.4369	2053	74.4925	2159	83.1024	1484
ENSMUSG00000097391	Mirg	21.7904	23.7208	19.2165	1.2507	0.32274	0.0516516	0.820954	12	109729764	109749460	1	lncRNA	miRNA containing gene [Source:MGI Symbol;Acc:MGI:3781106]	ENSMUST00000181496,ENSMUST00000181543,ENSMUST00000182074,ENSMUST00000182185,ENSMUST00000182231,ENSMUST00000182268,ENSMUST00000182300,ENSMUST00000182499,ENSMUST00000183068,ENSMUST00000183084,ENSMUST00000183116,ENSMUST00000183144	24.4149	696	23.1854	640	25.3022	622	21.9807	756	13.2815	277	20.7364	601	23.6316	422
ENSMUSG00000074811	Hps6	7.10428	6.24124	8.255	-1.30672	-0.385948	0.0516579	0.820954	19	46003508	46006173	1	protein_coding	HPS6, biogenesis of lysosomal organelles complex 2 subunit 3 [Source:MGI Symbol;Acc:MGI:2181763]	ENSMUST00000099393	6.27912	179	6.77448	187	5.57299	137	6.33836	218	10.0211	209	6.17608	179	8.56784	153
ENSMUSG00000035551	Igfbpl1	5.52256	4.21005	7.27257	-1.55345	-0.635477	0.0517529	0.821577	4	45809468	45826923	-1	protein_coding	insulin-like growth factor binding protein-like 1 [Source:MGI Symbol;Acc:MGI:1933198]	ENSMUST00000044297,ENSMUST00000145102	3.40265	97	5.8688	162	3.70177	91	3.86698	133	4.3153	90	11.0065	319	6.49588	116
ENSMUSG00000066621	Tecpr1	37.2638	34.6864	40.7004	-1.16411	-0.219228	0.0518986	0.823003	5	144194442	144223615	-1	protein_coding	tectonin beta-propeller repeat containing 1 [Source:MGI Symbol;Acc:MGI:1917631]	ENSMUST00000085701,ENSMUST00000125672,ENSMUST00000130962,ENSMUST00000136018,ENSMUST00000137149,ENSMUST00000140524,ENSMUST00000147992,ENSMUST00000151479,ENSMUST00000153103,ENSMUST00000153751,ENSMUST00000156129,ENSMUST00000196360	33.6757	960	31.9886	883	38.8889	956	34.1923	1176	41.9064	874	42.0594	1219	38.1353	681
ENSMUSG00000008136	Fhl2	64.1229	58.7292	71.3146	-1.1478	-0.198875	0.0522869	0.826316	1	43123074	43196984	-1	protein_coding	four and a half LIM domains 2 [Source:MGI Symbol;Acc:MGI:1338762]	ENSMUST00000008280,ENSMUST00000185893,ENSMUST00000187357	48.1984	1374	68.6143	1894	61.2622	1506	56.8417	1955	67.5105	1408	70.3866	2040	76.0466	1358
ENSMUSG00000115022	Gm49387	1.69987	1.25682	2.2906	-2.699	-1.43242	0.0523124	0.826316	14	31552905	31640878	-1	protein_coding	predicted gene, 49387 [Source:MGI Symbol;Acc:MGI:6121612]	ENSMUST00000167175	1.29792	37	2.10118	58	0	0	1.6282	56	3.54814	74	2.03569	59	1.28798	23
ENSMUSG00000098912	1500004A13Rik	10.4429	9.39662	11.838	-1.29192	-0.369516	0.0523158	0.826316	3	88782943	88832547	-1	lncRNA	RIKEN cDNA 1500004A13 gene [Source:MGI Symbol;Acc:MGI:2442808]	ENSMUST00000183374,ENSMUST00000183707,ENSMUST00000183966,ENSMUST00000184013,ENSMUST00000184014,ENSMUST00000184170,ENSMUST00000184640,ENSMUST00000184958,ENSMUST00000185189	9.85716	281	7.53526	208	11.268	277	8.92604	307	11.8431	247	10.903	316	12.7678	228
ENSMUSG00000027997	Casp6	50.7215	47.4044	55.1444	-1.14293	-0.192742	0.0524394	0.826316	3	129901425	129914103	1	protein_coding	caspase 6 [Source:MGI Symbol;Acc:MGI:1312921]	ENSMUST00000029626,ENSMUST00000137314,ENSMUST00000152622,ENSMUST00000197175	45.2868	1291	49.4139	1364	47.3501	1164	47.5668	1636	58.1607	1213	49.2016	1426	58.0709	1037
ENSMUSG00000036968	Cnpy4	37.0781	35.5621	39.0993	-1.1589	-0.212755	0.0524646	0.826316	5	138187485	138193918	1	protein_coding	canopy FGF signaling regulator 4 [Source:MGI Symbol;Acc:MGI:1913705]	ENSMUST00000110932,ENSMUST00000110934,ENSMUST00000130126	40.937	1167	31.735	876	36.2855	892	33.2909	1145	38.55	804	38.9886	1130	39.7593	710
ENSMUSG00000043312	Olfr131	0.943172	1.13839	0.682876	1.82232	0.865776	0.0524747	0.826316	17	38081624	38088693	-1	protein_coding	olfactory receptor 131 [Source:MGI Symbol;Acc:MGI:2177514]	ENSMUST00000059560,ENSMUST00000172933,ENSMUST00000215940,ENSMUST00000216523	0.841893	24	1.01436	28	1.30172	32	1.3956	48	0.863061	18	0.793574	23	0.391993	7
ENSMUSG00000026433	Rab29	5.11853	4.50089	5.94206	-1.33805	-0.420127	0.0525001	0.826316	1	131867224	131872887	1	protein_coding	RAB29, member RAS oncogene family [Source:MGI Symbol;Acc:MGI:2385107]	ENSMUST00000027693,ENSMUST00000112386,ENSMUST00000125925,ENSMUST00000187084	4.70057	134	4.1299	114	4.63738	114	4.53571	156	5.32221	111	6.17608	179	6.32788	113
ENSMUSG00000026603	Smyd2	81.9375	75.991	89.8662	-1.12261	-0.166852	0.0526758	0.827755	1	189880492	189922363	-1	protein_coding	SET and MYND domain containing 2 [Source:MGI Symbol;Acc:MGI:1915889]	ENSMUST00000027897,ENSMUST00000130804,ENSMUST00000132289,ENSMUST00000144452	63.7032	1816	84.3369	2328	80.5033	1979	75.4207	2594	88.8473	1853	94.4008	2736	86.3504	1542
ENSMUSG00000023055	Calcoco1	78.0918	74.4858	82.8997	-1.1227	-0.166979	0.0527039	0.827755	15	102706777	102722178	-1	protein_coding	calcium binding and coiled coil domain 1 [Source:MGI Symbol;Acc:MGI:1914738]	ENSMUST00000023818,ENSMUST00000166943,ENSMUST00000168112,ENSMUST00000171838,ENSMUST00000229231,ENSMUST00000229398,ENSMUST00000230035,ENSMUST00000230374,ENSMUST00000230702	76.6123	2184	73.7586	2036	73.5472	1808	74.0251	2546	85.4909	1783	78.4258	2273	84.7824	1514
ENSMUSG00000039661	Dusp26	17.833	19.3119	15.8613	1.22284	0.290233	0.0527815	0.827805	8	31089471	31097047	1	protein_coding	dual specificity phosphatase 26 (putative) [Source:MGI Symbol;Acc:MGI:1914209]	ENSMUST00000036631,ENSMUST00000160700,ENSMUST00000161713,ENSMUST00000162551,ENSMUST00000170204	19.2232	548	19.9612	551	21.1123	519	16.9508	583	18.1243	378	13.8358	401	15.6237	279
ENSMUSG00000018882	Mrpl45	44.5753	46.3617	42.1935	1.16945	0.225835	0.0528195	0.827805	11	97315716	97329920	1	protein_coding	mitochondrial ribosomal protein L45 [Source:MGI Symbol;Acc:MGI:1914286]	ENSMUST00000019026,ENSMUST00000132168	38.4815	1097	50.066	1382	48.2857	1187	48.6135	1672	34.6663	723	47.787	1385	44.1272	788
ENSMUSG00000073060	Zxda	4.01555	3.46142	4.75439	-1.54194	-0.624742	0.0529067	0.82829	X	94795563	94798183	-1	unprocessed_pseudogene	zinc finger, X-linked, duplicated A [Source:MGI Symbol;Acc:MGI:1921689]	ENSMUST00000117281	4.4901	128	2.10118	58	4.23059	104	3.02381	104	5.56195	116	3.38132	98	5.3199	95
ENSMUSG00000019437	Tlcd1	15.5016	13.8148	17.7508	-1.24506	-0.316212	0.0530169	0.828554	11	78176711	78181909	1	protein_coding	TLC domain containing 1 [Source:MGI Symbol;Acc:MGI:1915572]	ENSMUST00000092880,ENSMUST00000098545,ENSMUST00000108338,ENSMUST00000127587,ENSMUST00000140379,ENSMUST00000141578,ENSMUST00000145507,ENSMUST00000147819	12.8038	365	12.7157	351	15.3766	378	14.3631	494	17.6448	368	14.6639	425	20.9436	374
ENSMUSG00000100131	Gm28439	602.112	669.309	512.517	1.24369	0.314632	0.0530515	0.828554	1	24611535	24612410	-1	unprocessed_pseudogene	predicted gene 28439 [Source:MGI Symbol;Acc:MGI:5579145]	ENSMUST00000187714	799.483	22791	692.084	19104	610.71	15013	574.959	19775	387.85	8089	649.351	18820	500.351	8935
ENSMUSG00000039168	Dap	60.2376	57.7414	63.5659	-1.13009	-0.176443	0.0530922	0.828554	15	31224314	31274341	1	protein_coding	death-associated protein [Source:MGI Symbol;Acc:MGI:1918190]	ENSMUST00000044524,ENSMUST00000185618,ENSMUST00000186109,ENSMUST00000186425,ENSMUST00000186547	62.6158	1785	57.6737	1592	55.6079	1367	55.0681	1894	69.3325	1446	58.3105	1690	63.0548	1126
ENSMUSG00000039349	C130074G19Rik	4.00941	3.39592	4.8274	-1.44605	-0.532113	0.0532473	0.829218	1	184871926	184883218	-1	protein_coding	RIKEN cDNA C130074G19 gene [Source:MGI Symbol;Acc:MGI:2444831]	ENSMUST00000048308	3.92883	112	2.78949	77	3.37634	83	3.48901	120	4.02762	84	7.03866	204	3.41594	61
ENSMUSG00000066842	Hmcn1	86.2409	86.7061	85.6207	-1.1699	-0.226382	0.0532474	0.829218	1	150562524	150993435	-1	protein_coding	hemicentin 1 [Source:MGI Symbol;Acc:MGI:2685047]	ENSMUST00000074783,ENSMUST00000137197,ENSMUST00000137909,ENSMUST00000151899,ENSMUST00000155715,ENSMUST00000177036	125.933	3590	56.7318	1566	78.1846	1922	85.9749	2957	77.8193	1623	102.716	2977	76.3266	1363
ENSMUSG00000031523	Dlc1	117.71	110.492	127.335	-1.13093	-0.177515	0.0534824	0.82949	8	36567751	36953143	-1	protein_coding	deleted in liver cancer 1 [Source:MGI Symbol;Acc:MGI:1354949]	ENSMUST00000033923,ENSMUST00000036104,ENSMUST00000098826,ENSMUST00000145245,ENSMUST00000156312,ENSMUST00000163663,ENSMUST00000178717,ENSMUST00000179501,ENSMUST00000179652	103.974	2964	109.515	3023	107.961	2654	120.516	4145	131.329	2739	130.112	3771	120.566	2153
ENSMUSG00000041540	Sox5	20.3876	19.0722	22.1414	-1.20039	-0.263509	0.0534969	0.82949	6	143828425	144781977	-1	protein_coding	SRY (sex determining region Y)-box 5 [Source:MGI Symbol;Acc:MGI:98367]	ENSMUST00000038815,ENSMUST00000077160,ENSMUST00000111746,ENSMUST00000111748,ENSMUST00000111749,ENSMUST00000124233,ENSMUST00000129050,ENSMUST00000139478,ENSMUST00000141102,ENSMUST00000142294,ENSMUST00000144289,ENSMUST00000149451,ENSMUST00000150087,ENSMUST00000170367	20.6615	589	19.3453	534	14.7664	363	21.5155	740	24.837	518	18.9078	548	22.6796	405
ENSMUSG00000098754	Prn	4.81864	4.26289	5.55964	-1.39464	-0.479893	0.0535454	0.82949	2	131909957	131956130	1	protein_coding	prion protein readthrough transcript [Source:MGI Symbol;Acc:MGI:97767]	ENSMUST00000124100,ENSMUST00000136783	5.29691	151	4.23858	117	4.23059	104	3.28548	113	7.24012	151	4.17489	121	5.2639	94
ENSMUSG00000000739	Sult5a1	4.24531	3.72768	4.93549	-1.38404	-0.468889	0.0535487	0.82949	8	123140192	123158315	-1	protein_coding	sulfotransferase family 5A, member 1 [Source:MGI Symbol;Acc:MGI:1931463]	ENSMUST00000000755,ENSMUST00000122819,ENSMUST00000126951,ENSMUST00000137998,ENSMUST00000146007,ENSMUST00000152722	4.20946	120	3.87631	107	2.92887	72	3.89606	134	5.84963	122	4.58893	133	4.36792	78
ENSMUSG00000086555	Gm13446	1.16995	1.39335	0.872077	1.70916	0.773289	0.0535607	0.82949	2	35549538	35558702	-1	lncRNA	predicted gene 13446 [Source:MGI Symbol;Acc:MGI:3649869]	ENSMUST00000124555,ENSMUST00000134679	1.01729	29	1.37663	38	2.07462	51	1.10485	38	0.767165	16	0.897084	26	0.951982	17
ENSMUSG00000030802	Bckdk	72.5272	68.4868	77.9146	-1.12266	-0.166919	0.0536641	0.82949	7	127904082	127910221	1	protein_coding	branched chain ketoacid dehydrogenase kinase [Source:MGI Symbol;Acc:MGI:1276121]	ENSMUST00000071056,ENSMUST00000124533,ENSMUST00000146574,ENSMUST00000151451,ENSMUST00000206068,ENSMUST00000206140,ENSMUST00000206745	65.4572	1866	75.2076	2076	68.503	1684	64.7792	2228	80.9359	1688	76.8732	2228	75.9346	1356
ENSMUSG00000049414	Gm5417	1.3737	1.6826	0.961839	1.68193	0.75012	0.0536686	0.82949	15	83405626	83406063	-1	processed_pseudogene	predicted gene 5417 [Source:MGI Symbol;Acc:MGI:3648626]	ENSMUST00000079706	1.8241	52	1.41286	39	2.15597	53	1.33745	46	0.958956	20	0.862581	25	1.06398	19
ENSMUSG00000030762	Aqp8	0.905515	1.05237	0.709713	1.79252	0.841993	0.0537389	0.82949	7	123462291	123468004	1	protein_coding	aquaporin 8 [Source:MGI Symbol;Acc:MGI:1195271]	ENSMUST00000033023,ENSMUST00000098056,ENSMUST00000206106	0.456025	13	1.1955	33	1.01697	25	1.54098	53	0.383582	8	0.793574	23	0.951982	17
ENSMUSG00000057132	Rpgrip1	1.46338	1.12043	1.92064	-1.6984	-0.764179	0.0537716	0.82949	14	52110704	52163546	1	protein_coding	retinitis pigmentosa GTPase regulator interacting protein 1 [Source:MGI Symbol;Acc:MGI:1932134]	ENSMUST00000111600,ENSMUST00000111603,ENSMUST00000180388,ENSMUST00000180433,ENSMUST00000180484,ENSMUST00000180500,ENSMUST00000180513,ENSMUST00000180646,ENSMUST00000180901,ENSMUST00000181017,ENSMUST00000181208,ENSMUST00000181297,ENSMUST00000181401,ENSMUST00000181627,ENSMUST00000181673,ENSMUST00000181709,ENSMUST00000181736,ENSMUST00000181823,ENSMUST00000181862	1.05237	30	0.615862	17	1.50511	37	1.30838	45	1.53433	32	1.48364	43	2.74395	49
ENSMUSG00000047686	Rtl3	14.0679	15.7864	11.7765	1.22762	0.295862	0.0540215	0.831834	X	106837082	106840644	-1	protein_coding	retrotransposon Gag like 3 [Source:MGI Symbol;Acc:MGI:2685221]	ENSMUST00000062010	19.6091	559	13.6214	376	13.546	333	16.3693	563	12.2267	255	11.4551	332	11.6478	208
ENSMUSG00000028655	Mfsd2a	6.13799	5.662	6.77265	-1.36061	-0.444256	0.0540365	0.831834	4	122946850	122961188	-1	protein_coding	major facilitator superfamily domain containing 2A [Source:MGI Symbol;Acc:MGI:1923824]	ENSMUST00000030408,ENSMUST00000127047,ENSMUST00000138964,ENSMUST00000152308	7.57704	216	4.63708	128	6.30521	155	4.12866	142	7.33602	153	6.03806	175	6.94387	124
ENSMUSG00000032997	Chpf	73.6608	69.7345	78.8959	-1.17895	-0.237499	0.054108	0.831987	1	75474569	75479307	-1	protein_coding	chondroitin polymerizing factor [Source:MGI Symbol;Acc:MGI:106576]	ENSMUST00000079205,ENSMUST00000094818,ENSMUST00000124042,ENSMUST00000138683,ENSMUST00000143496	76.4369	2179	53.7974	1485	77.4117	1903	71.292	2452	85.6827	1787	75.1825	2179	75.8226	1354
ENSMUSG00000031303	Map3k15	3.86987	3.31659	4.60758	-1.38954	-0.474611	0.0542058	0.831987	X	159988433	160123351	1	protein_coding	mitogen-activated protein kinase kinase kinase 15 [Source:MGI Symbol;Acc:MGI:2448588]	ENSMUST00000033665	3.26234	93	3.7314	103	2.72548	67	3.54716	122	4.65094	97	4.2439	123	4.92791	88
ENSMUSG00000005268	Prlr	0.961962	0.692314	1.32149	-1.99362	-0.995387	0.0542158	0.831987	15	10177238	10349180	1	protein_coding	prolactin receptor [Source:MGI Symbol;Acc:MGI:97763]	ENSMUST00000005400,ENSMUST00000124470,ENSMUST00000127467,ENSMUST00000128450,ENSMUST00000128921,ENSMUST00000130720,ENSMUST00000132361,ENSMUST00000134410,ENSMUST00000137867,ENSMUST00000138135,ENSMUST00000145428,ENSMUST00000148257	0.63142	18	1.05059	29	0.244073	6	0.843176	29	1.05485	22	1.62165	47	1.28798	23
ENSMUSG00000095403	Gm21092	3.74212	4.15204	3.19556	1.3978	0.483156	0.0542865	0.832205	8	20567597	20582771	1	unprocessed_pseudogene	predicted gene, 21092 [Source:MGI Symbol;Acc:MGI:5434447]	ENSMUST00000178995	3.26234	93	4.02122	111	4.14923	102	5.17536	178	3.2125	67	2.62225	76	3.75193	67
ENSMUSG00000052430	Bmpr1b	2.3227	2.81557	1.66554	1.53288	0.616244	0.0545613	0.834876	3	141837136	142169425	-1	protein_coding	bone morphogenetic protein receptor, type 1B [Source:MGI Symbol;Acc:MGI:107191]	ENSMUST00000029948,ENSMUST00000098568,ENSMUST00000106230,ENSMUST00000106232,ENSMUST00000131273	3.89376	111	1.95627	54	2.35937	58	3.05288	105	0.911008	19	1.62165	47	2.46395	44
ENSMUSG00000054252	Fgfr3	39.938	43.737	34.8727	1.19227	0.253716	0.0547174	0.834876	5	33721674	33737068	1	protein_coding	fibroblast growth factor receptor 3 [Source:MGI Symbol;Acc:MGI:95524]	ENSMUST00000067150,ENSMUST00000087820,ENSMUST00000114411,ENSMUST00000132724,ENSMUST00000134610,ENSMUST00000142860,ENSMUST00000152661,ENSMUST00000155002,ENSMUST00000164207,ENSMUST00000169212,ENSMUST00000171509,ENSMUST00000181298,ENSMUST00000201295,ENSMUST00000201437,ENSMUST00000202138,ENSMUST00000202182,ENSMUST00000202791	50.4434	1438	37.0604	1023	47.7569	1174	39.6874	1365	40.8515	852	32.295	936	31.4714	562
ENSMUSG00000094747	Olfr1307	3.52409	4.0443	2.83047	1.43613	0.52219	0.0547293	0.834876	2	111930116	111949440	-1	protein_coding	olfactory receptor 1307 [Source:MGI Symbol;Acc:MGI:3031141]	ENSMUST00000099604,ENSMUST00000099606	3.89376	111	4.5284	125	3.33566	82	4.41941	152	3.06866	64	3.07079	89	2.35196	42
ENSMUSG00000079259	Trim71	7.36399	8.0947	6.38971	1.29712	0.375313	0.0547418	0.834876	9	114507133	114564369	-1	protein_coding	tripartite motif-containing 71 [Source:MGI Symbol;Acc:MGI:2685973]	ENSMUST00000111816	7.50688	214	7.75262	214	9.15272	225	7.96656	274	6.71269	140	6.07257	176	6.38388	114
ENSMUSG00000026821	Ralgds	34.528	32.5084	37.2208	-1.16411	-0.219232	0.0548086	0.834876	2	28513125	28553081	1	protein_coding	ral guanine nucleotide dissociation stimulator [Source:MGI Symbol;Acc:MGI:107485]	ENSMUST00000028170,ENSMUST00000100241,ENSMUST00000113893,ENSMUST00000128680,ENSMUST00000130281,ENSMUST00000135803,ENSMUST00000137215,ENSMUST00000137513,ENSMUST00000140704,ENSMUST00000146217,ENSMUST00000238699	34.2019	975	30.6844	847	33.1939	816	31.9535	1099	39.7967	830	36.6424	1062	35.2233	629
ENSMUSG00000113642	Gm49329	5.0008	5.70342	4.06397	1.40301	0.488521	0.0548236	0.834876	12	17900734	18065610	1	transcribed_unprocessed_pseudogene	predicted gene, 49329 [Source:MGI Symbol;Acc:MGI:6121514]	ENSMUST00000221149,ENSMUST00000222523,ENSMUST00000223186	5.71786	163	4.99935	138	7.03742	173	5.05906	174	4.89068	102	3.38132	98	3.91993	70
ENSMUSG00000035783	Acta2	1709.09	1811.28	1572.83	1.20011	0.263161	0.0548857	0.834876	19	34241090	34255590	-1	protein_coding	actin, alpha 2, smooth muscle, aorta [Source:MGI Symbol;Acc:MGI:87909]	ENSMUST00000039631,ENSMUST00000238147	1556.7	44377	2024.56	55885	2068.11	50840	1595.76	54884	1701.86	35494	1568.1	45448	1448.52	25867
ENSMUSG00000054693	Adam10	270.937	288.728	247.217	1.14397	0.194054	0.0549141	0.834876	9	70678997	70780229	1	protein_coding	a disintegrin and metallopeptidase domain 10 [Source:MGI Symbol;Acc:MGI:109548]	ENSMUST00000067880,ENSMUST00000140205,ENSMUST00000144537,ENSMUST00000145377	306.239	8730	266.379	7353	283.897	6979	298.397	10263	234.705	4895	259.43	7519	247.515	4420
ENSMUSG00000102627	Snurf	2.89847	2.35835	3.61863	-1.5223	-0.606251	0.0550255	0.835398	7	59995449	60005049	-1	protein_coding	SNRPN upstream reading frame [Source:MGI Symbol;Acc:MGI:1891236]	ENSMUST00000194059	2.4906	71	2.24609	62	2.80683	69	1.88988	65	2.2056	46	4.00237	116	4.64791	83
ENSMUSG00000067344	Rps25-ps1	23.0028	25.2651	19.9865	1.33591	0.417823	0.0551235	0.835398	6	145266400	145266777	1	processed_pseudogene	ribosomal protein S25, pseudogene 1 [Source:MGI Symbol;Acc:MGI:3642902]	ENSMUST00000119876	19.5389	557	36.9517	1020	21.6004	531	22.9693	790	15.1995	317	20.7364	601	24.0235	429
ENSMUSG00000024958	Gpr137	22.4327	20.786	24.6284	-1.21277	-0.278304	0.0551669	0.835398	19	6938057	6942480	-1	protein_coding	G protein-coupled receptor 137 [Source:MGI Symbol;Acc:MGI:2147529]	ENSMUST00000025909,ENSMUST00000099774,ENSMUST00000099776,ENSMUST00000099782,ENSMUST00000166115,ENSMUST00000235237,ENSMUST00000235363,ENSMUST00000235518,ENSMUST00000235881,ENSMUST00000236348,ENSMUST00000237911,ENSMUST00000237934,ENSMUST00000238128,ENSMUST00000238183	21.4332	611	18.6208	514	25.7903	634	17.2997	595	25.3644	529	24.4973	710	24.0235	429
ENSMUSG00000038047	Haus6	39.5743	41.8323	36.5637	1.14516	0.195544	0.0552196	0.835398	4	86578855	86612055	-1	protein_coding	HAUS augmin-like complex, subunit 6 [Source:MGI Symbol;Acc:MGI:1923389]	ENSMUST00000070607,ENSMUST00000123432,ENSMUST00000125481,ENSMUST00000128381	41.7439	1190	41.5164	1146	42.9568	1056	41.1121	1414	35.0499	731	37.85	1097	36.7913	657
ENSMUSG00000092283	Gm20412	1.89585	1.35775	2.61333	-1.58319	-0.662837	0.055232	0.835398	2	158117154	158117905	1	lncRNA	predicted gene 20412 [Source:MGI Symbol;Acc:MGI:5141877]	ENSMUST00000173249	0.666499	19	1.81136	50	1.38308	34	1.57005	54	2.39739	50	1.69066	49	3.75193	67
ENSMUSG00000063011	Msln	2.67057	2.13735	3.38153	-1.51871	-0.602849	0.0555033	0.838457	17	25748613	25754378	-1	protein_coding	mesothelin [Source:MGI Symbol;Acc:MGI:1888992]	ENSMUST00000075884,ENSMUST00000235228,ENSMUST00000235374,ENSMUST00000236053,ENSMUST00000236137,ENSMUST00000237012,ENSMUST00000237359,ENSMUST00000238120,ENSMUST00000238188	1.64871	47	2.02872	56	1.58647	39	3.28548	113	2.92482	61	3.69185	107	3.52793	63
ENSMUSG00000024797	Vps51	40.6463	38.4541	43.5693	-1.1419	-0.191436	0.055548	0.838457	19	6067842	6077231	-1	protein_coding	VPS51 GARP complex subunit [Source:MGI Symbol;Acc:MGI:1915755]	ENSMUST00000025711,ENSMUST00000159211,ENSMUST00000159475,ENSMUST00000159869,ENSMUST00000160233,ENSMUST00000160324,ENSMUST00000160519,ENSMUST00000160590,ENSMUST00000161222,ENSMUST00000161634,ENSMUST00000236983	39.4287	1124	41.625	1149	36.4482	896	36.3147	1249	47.9478	1000	40.3688	1170	42.3912	757
ENSMUSG00000062257	Opcml	2.71835	2.42538	3.10898	-1.51483	-0.599153	0.0556207	0.838695	9	27790775	28925410	1	protein_coding	opioid binding protein/cell adhesion molecule-like [Source:MGI Symbol;Acc:MGI:97397]	ENSMUST00000073822,ENSMUST00000115243,ENSMUST00000123779,ENSMUST00000126673,ENSMUST00000126845,ENSMUST00000133142,ENSMUST00000134002,ENSMUST00000150098,ENSMUST00000214395	3.47281	99	1.48531	41	2.56276	63	2.18063	75	3.45224	72	2.79476	81	3.07994	55
ENSMUSG00000039497	Dse	63.6149	61.965	65.8147	-1.12482	-0.169691	0.055693	0.838926	10	34151393	34207715	-1	protein_coding	dermatan sulfate epimerase [Source:MGI Symbol;Acc:MGI:2443455]	ENSMUST00000048010,ENSMUST00000215547,ENSMUST00000216194,ENSMUST00000216774,ENSMUST00000217051	72.4028	2064	54.7755	1512	58.374	1435	62.3078	2143	62.1883	1297	63.969	1854	71.2867	1273
ENSMUSG00000109118	Gm32031	1.25946	1.02295	1.5748	-1.62942	-0.704358	0.0558946	0.839446	7	47008083	47009008	1	lncRNA	predicted gene, 32031 [Source:MGI Symbol;Acc:MGI:5591190]	ENSMUST00000208046,ENSMUST00000208927,ENSMUST00000208993	1.19268	34	1.05059	29	0.97629	24	0.872252	30	1.58228	33	1.51814	44	1.62397	29
ENSMUSG00000112280	A830082N09Rik	3.68713	4.19932	3.0042	1.44072	0.526793	0.0559064	0.839446	10	33987216	33995055	-1	lncRNA	RIKEN cDNA A830082N09 gene [Source:MGI Symbol;Acc:MGI:3041184]	ENSMUST00000164429,ENSMUST00000217778,ENSMUST00000218182	4.03407	115	3.84008	106	4.47466	110	4.44848	153	2.97276	62	3.96787	115	2.07196	37
ENSMUSG00000028645	Slc2a1	743.179	775.782	699.71	1.20311	0.266763	0.0559432	0.839446	4	119108711	119137983	1	protein_coding	solute carrier family 2 (facilitated glucose transporter), member 1 [Source:MGI Symbol;Acc:MGI:95755]	ENSMUST00000030398,ENSMUST00000134105,ENSMUST00000144329,ENSMUST00000174372,ENSMUST00000208090	599.112	17079	867.062	23934	856.288	21050	780.665	26850	767.357	16004	566.267	16412	765.506	13670
ENSMUSG00000073471	Rsph3a	20.4906	18.4475	23.2148	-1.26274	-0.336562	0.0559738	0.839446	17	7945614	7979824	1	protein_coding	radial spoke 3A homolog (Chlamydomonas) [Source:MGI Symbol;Acc:MGI:1914082]	ENSMUST00000097423,ENSMUST00000231320,ENSMUST00000231845,ENSMUST00000231900,ENSMUST00000232223,ENSMUST00000232233,ENSMUST00000232627	17.9253	511	17.8962	494	23.431	576	14.5375	500	21.8163	455	21.5645	625	26.2635	469
ENSMUSG00000022698	Naa50	123.543	130.142	114.745	1.14431	0.194482	0.0560175	0.839446	16	44139830	44163366	1	protein_coding	N(alpha)-acetyltransferase 50, NatE catalytic subunit [Source:MGI Symbol;Acc:MGI:1919367]	ENSMUST00000063520,ENSMUST00000063542,ENSMUST00000159514,ENSMUST00000161326	127.617	3638	134.874	3723	123.257	3030	134.821	4637	101.122	2109	119.692	3469	123.422	2204
ENSMUSG00000073063	Hbq1b	1.0643	1.27615	0.78184	1.70592	0.770552	0.0562196	0.839446	11	32286965	32287784	1	protein_coding	hemoglobin, theta 1B [Source:MGI Symbol;Acc:MGI:3613460]	ENSMUST00000101387,ENSMUST00000151724	1.12252	32	1.08682	30	0.97629	24	1.91895	66	0.479478	10	0.690065	20	1.17598	21
ENSMUSG00000021477	Ctsl	267.157	252.891	286.18	-1.15087	-0.202725	0.0562564	0.839446	13	64359337	64370890	-1	protein_coding	cathepsin L [Source:MGI Symbol;Acc:MGI:88564]	ENSMUST00000021933,ENSMUST00000220617,ENSMUST00000220737,ENSMUST00000222462,ENSMUST00000222517,ENSMUST00000222971,ENSMUST00000223494	267.02	7612	239.208	6603	255.463	6280	249.871	8594	294.256	6137	259.706	7527	304.578	5439
ENSMUSG00000033569	Adgrb3	1.93575	1.69489	2.25691	-1.54001	-0.62294	0.0562913	0.839446	1	25067476	25829707	-1	protein_coding	adhesion G protein-coupled receptor B3 [Source:MGI Symbol;Acc:MGI:2441837]	ENSMUST00000041838,ENSMUST00000126096,ENSMUST00000126626,ENSMUST00000134022,ENSMUST00000135518,ENSMUST00000146592,ENSMUST00000151309,ENSMUST00000153568,ENSMUST00000154102,ENSMUST00000189254,ENSMUST00000190202	2.35028	67	1.55777	43	1.70851	42	1.163	40	2.25355	47	2.27721	66	2.23996	40
ENSMUSG00000115665	4933425B07Rik	1.41365	1.05927	1.88616	-1.78634	-0.83701	0.0563222	0.839446	14	46602806	46637423	-1	lncRNA	RIKEN cDNA 4933425B07 gene [Source:MGI Symbol;Acc:MGI:1921708]	ENSMUST00000226569,ENSMUST00000228452	1.05237	30	1.23172	34	1.3424	33	0.610576	21	1.91791	40	1.27662	37	2.46395	44
ENSMUSG00000020182	Ddc	23.9488	20.5725	28.4504	-1.28589	-0.362764	0.0563969	0.839446	11	11814101	11898144	-1	protein_coding	dopa decarboxylase [Source:MGI Symbol;Acc:MGI:94876]	ENSMUST00000066237,ENSMUST00000109659,ENSMUST00000122971,ENSMUST00000134121,ENSMUST00000134401,ENSMUST00000136810,ENSMUST00000145033,ENSMUST00000146359,ENSMUST00000155690,ENSMUST00000178704	15.2593	435	26.627	735	16.2715	400	24.1323	830	26.1316	545	34.0202	986	25.1995	450
ENSMUSG00000085180	AI838599	1.80418	2.21147	1.26113	1.66808	0.738191	0.0564824	0.839446	4	3242055	3258092	1	lncRNA	expressed sequence AI838599 [Source:MGI Symbol;Acc:MGI:3510989]	ENSMUST00000133960,ENSMUST00000136306,ENSMUST00000141405,ENSMUST00000144933,ENSMUST00000145581	2.70107	77	2.35477	65	2.07462	51	1.71543	59	0.671269	14	1.65615	48	1.45597	26
ENSMUSG00000037306	Man1c1	63.3573	65.5071	60.4908	1.12968	0.175914	0.0565001	0.839446	4	134561690	134704290	-1	protein_coding	mannosidase, alpha, class 1C, member 1 [Source:MGI Symbol;Acc:MGI:2446214]	ENSMUST00000038628,ENSMUST00000054096,ENSMUST00000176606	57.2487	1632	67.0203	1850	68.9098	1694	68.8497	2368	64.4898	1345	60.3116	1748	56.6709	1012
ENSMUSG00000022040	Ephx2	11.9246	10.6666	13.602	-1.2381	-0.30813	0.0565202	0.839446	14	66084374	66124500	-1	protein_coding	epoxide hydrolase 2, cytoplasmic [Source:MGI Symbol;Acc:MGI:99500]	ENSMUST00000070515,ENSMUST00000224698,ENSMUST00000225309	9.78701	279	10.9406	302	10.6578	262	11.2811	388	12.0828	252	13.9393	404	14.7837	264
ENSMUSG00000028717	Tal1	28.2821	29.7971	26.2622	1.1616	0.21611	0.0565902	0.839446	4	115056426	115071755	1	protein_coding	T cell acute lymphocytic leukemia 1 [Source:MGI Symbol;Acc:MGI:98480]	ENSMUST00000030489,ENSMUST00000136946,ENSMUST00000161601,ENSMUST00000162489	27.8175	793	28.547	788	29.5328	726	33.2909	1145	25.748	537	23.8072	690	29.2315	522
ENSMUSG00000036103	Colec12	110.083	114.244	104.535	1.1249	0.169798	0.0566389	0.839446	18	9707595	9882644	1	protein_coding	collectin sub-family member 12 [Source:MGI Symbol;Acc:MGI:2152907]	ENSMUST00000040069,ENSMUST00000234026,ENSMUST00000234149,ENSMUST00000234965	102.992	2936	122.339	3377	104.178	2561	127.465	4384	103.567	2160	101.681	2947	108.358	1935
ENSMUSG00000029298	Gbp9	4.68221	4.18168	5.34957	-1.37282	-0.457146	0.0566393	0.839446	5	105077630	105139539	-1	protein_coding	guanylate-binding protein 9 [Source:MGI Symbol;Acc:MGI:3605620]	ENSMUST00000031238,ENSMUST00000100961,ENSMUST00000196820,ENSMUST00000199453	5.05136	144	3.98499	110	4.43398	109	3.25641	112	4.36325	91	6.14157	178	5.5439	99
ENSMUSG00000031204	Asb12	3.44878	3.98562	2.733	1.47309	0.558846	0.0567302	0.839949	X	95470201	95557987	-1	protein_coding	ankyrin repeat and SOCS box-containing 12 [Source:MGI Symbol;Acc:MGI:1917642]	ENSMUST00000033549,ENSMUST00000134899	3.78852	108	4.81822	133	4.31195	106	3.02381	104	2.44534	51	2.44973	71	3.30394	59
ENSMUSG00000046410	Kcnk6	17.9718	16.8547	19.4612	-1.21278	-0.278312	0.0568747	0.840928	7	29221926	29232515	-1	protein_coding	potassium inwardly-rectifying channel, subfamily K, member 6 [Source:MGI Symbol;Acc:MGI:1891291]	ENSMUST00000085818,ENSMUST00000208807	18.9777	541	13.2954	367	18.2241	448	16.9217	582	19.7066	411	20.2534	587	18.4237	329
ENSMUSG00000037315	Jade3	15.144	16.4822	13.3597	1.21584	0.281957	0.0569394	0.840928	X	20425688	20519939	1	protein_coding	jade family PHD finger 3 [Source:MGI Symbol;Acc:MGI:2148019]	ENSMUST00000043693,ENSMUST00000115384,ENSMUST00000136093,ENSMUST00000224892	17.1185	488	16.6283	459	15.1732	373	17.0089	585	13.2815	277	13.9738	405	12.8238	229
ENSMUSG00000022025	Cnmd	0.941617	1.21142	0.581878	1.83954	0.879342	0.0569676	0.840928	14	79637690	79662170	-1	protein_coding	chondromodulin [Source:MGI Symbol;Acc:MGI:1341171]	ENSMUST00000022603,ENSMUST00000165204,ENSMUST00000165835,ENSMUST00000167524,ENSMUST00000172331	1.57855	45	1.41286	39	1.09833	27	0.755951	26	0.383582	8	0.690065	20	0.671987	12
ENSMUSG00000111394	Gm49759	69.5824	71.8138	66.6073	1.13731	0.185622	0.0571867	0.842622	9	59672814	59676700	1	TEC	predicted gene, 49759 [Source:MGI Symbol;Acc:MGI:6215263]	ENSMUST00000214037	60.3006	1719	80.207	2214	81.1541	1995	65.5933	2256	76.7644	1601	61.3467	1778	61.7108	1102
ENSMUSG00000026749	Nek6	69.9988	67.3695	73.5045	-1.12255	-0.166775	0.0571967	0.842622	2	38511643	38594606	1	protein_coding	NIMA (never in mitosis gene a)-related expressed kinase 6 [Source:MGI Symbol;Acc:MGI:1891638]	ENSMUST00000054234,ENSMUST00000112895,ENSMUST00000112902,ENSMUST00000151683,ENSMUST00000156726	73.2096	2087	64.4844	1780	65.2894	1605	66.4946	2287	75.374	1572	69.317	2009	75.8226	1354
ENSMUSG00000022761	Lztr1	80.7484	77.3278	85.3093	-1.118	-0.160916	0.05729	0.843154	16	17508688	17526333	1	protein_coding	leucine-zipper-like transcriptional regulator, 1 [Source:MGI Symbol;Acc:MGI:1914113]	ENSMUST00000023444,ENSMUST00000231230,ENSMUST00000231292,ENSMUST00000231307,ENSMUST00000231326,ENSMUST00000231538,ENSMUST00000231684,ENSMUST00000231746,ENSMUST00000231994,ENSMUST00000232242,ENSMUST00000232372,ENSMUST00000232379,ENSMUST00000232438,ENSMUST00000232644	80.4008	2292	74.5193	2057	76.9642	1892	77.4269	2663	84.532	1763	84.4294	2447	86.9664	1553
ENSMUSG00000102748	Pcdhgb2	4.5712	4.04246	5.2762	-1.38552	-0.470427	0.0575008	0.844431	18	37689828	37841873	1	protein_coding	protocadherin gamma subfamily B, 2 [Source:MGI Symbol;Acc:MGI:1935170]	ENSMUST00000193631,ENSMUST00000195112	4.80581	137	3.26045	90	3.94584	97	4.15773	143	5.4181	113	6.21058	180	4.19992	75
ENSMUSG00000054690	Emcn	17.1748	13.5804	21.9673	-1.40165	-0.487122	0.0575206	0.844431	3	137341067	137432185	1	protein_coding	endomucin [Source:MGI Symbol;Acc:MGI:1891716]	ENSMUST00000119475,ENSMUST00000122064,ENSMUST00000128985,ENSMUST00000197511	11.3656	324	15.3603	424	12.8545	316	14.7411	507	12.4185	259	35.2278	1021	18.2557	326
ENSMUSG00000113961	Gm48498	3.28095	3.71483	2.70245	1.41628	0.502102	0.0576014	0.844431	12	14489404	14493244	-1	processed_pseudogene	predicted gene, 48498 [Source:MGI Symbol;Acc:MGI:6098024]	ENSMUST00000220577	3.36757	96	3.87631	107	3.45769	85	4.15773	143	3.06866	64	2.51874	73	2.51995	45
ENSMUSG00000113311	Gm47428	2.05704	1.51279	2.78271	-1.56094	-0.642414	0.0576545	0.844431	13	74404183	74406737	-1	lncRNA	predicted gene, 47428 [Source:MGI Symbol;Acc:MGI:6096373]	ENSMUST00000222047	0.806814	23	2.20986	61	1.46444	36	1.57005	54	2.73303	57	1.86317	54	3.75193	67
ENSMUSG00000026853	Crat	67.6027	63.1586	73.5281	-1.13019	-0.176562	0.0576634	0.844431	2	30400471	30415813	-1	protein_coding	carnitine acetyltransferase [Source:MGI Symbol;Acc:MGI:109501]	ENSMUST00000028207,ENSMUST00000102854,ENSMUST00000102855,ENSMUST00000128593,ENSMUST00000129494,ENSMUST00000132981,ENSMUST00000134120,ENSMUST00000142096,ENSMUST00000146603,ENSMUST00000146822,ENSMUST00000154595,ENSMUST00000155790,ENSMUST00000156702	57.389	1636	69.1577	1909	61.4249	1510	64.6629	2224	73.1684	1526	77.9773	2260	69.4387	1240
ENSMUSG00000055717	Slain1	1.32579	1.57097	0.99888	1.65646	0.728103	0.0579225	0.84708	14	103650228	103704907	1	protein_coding	SLAIN motif family, member 1 [Source:MGI Symbol;Acc:MGI:2145578]	ENSMUST00000069443,ENSMUST00000159456,ENSMUST00000160805,ENSMUST00000162818	1.22776	35	1.84759	51	2.07462	51	1.13393	39	0.863061	18	1.0696	31	1.06398	19
ENSMUSG00000053411	Cbx7	1.82875	1.46767	2.31018	-1.61761	-0.69386	0.0579796	0.84708	15	79915807	79971119	-1	protein_coding	chromobox 7 [Source:MGI Symbol;Acc:MGI:1196439]	ENSMUST00000089293,ENSMUST00000109615,ENSMUST00000109616,ENSMUST00000128931,ENSMUST00000132821,ENSMUST00000146719,ENSMUST00000176639,ENSMUST00000177044,ENSMUST00000177061	1.61363	46	1.30418	36	1.78987	44	1.163	40	2.34944	49	1.72516	50	2.85595	51
ENSMUSG00000021118	Plek2	3.23534	3.713	2.59845	1.41414	0.499927	0.0580168	0.84708	12	78888691	78906964	-1	protein_coding	pleckstrin 2 [Source:MGI Symbol;Acc:MGI:1351466]	ENSMUST00000021544	3.85868	110	3.29667	91	3.74245	92	3.95421	136	2.15765	45	2.72575	79	2.91195	52
ENSMUSG00000090247	Bloc1s1	35.2683	32.778	38.5888	-1.17856	-0.237029	0.0585284	0.851842	10	128917882	128924035	-1	protein_coding	biogenesis of lysosomal organelles complex-1, subunit 1 [Source:MGI Symbol;Acc:MGI:1195276]	ENSMUST00000026405,ENSMUST00000131271,ENSMUST00000141320,ENSMUST00000143628,ENSMUST00000153731	32.8338	936	33.9811	938	35.3092	868	28.9878	997	39.509	824	34.9863	1014	41.2712	737
ENSMUSG00000050332	Amer1	40.8682	42.9844	38.0465	1.14366	0.193661	0.0585466	0.851842	X	95420318	95444872	-1	protein_coding	APC membrane recruitment 1 [Source:MGI Symbol;Acc:MGI:1919595]	ENSMUST00000084535	41.358	1179	42.2771	1167	42.3059	1040	45.9967	1582	35.817	747	39.8512	1155	38.4713	687
ENSMUSG00000102411	Gm36936	5.80081	6.24172	5.21294	1.31416	0.394139	0.0586544	0.851842	9	72728140	72730888	1	TEC	predicted gene, 36936 [Source:MGI Symbol;Acc:MGI:5610164]	ENSMUST00000194508	4.38486	125	6.6658	184	7.60693	187	6.30929	217	5.13042	107	5.24449	152	5.2639	94
ENSMUSG00000001542	Ell2	15.2518	16.5435	13.5296	1.2071	0.27155	0.0586745	0.851842	13	75706757	75772364	1	protein_coding	elongation factor RNA polymerase II 2 [Source:MGI Symbol;Acc:MGI:2183438]	ENSMUST00000001583,ENSMUST00000220572,ENSMUST00000221432,ENSMUST00000221979,ENSMUST00000222194,ENSMUST00000222564,ENSMUST00000222853,ENSMUST00000222892,ENSMUST00000223535	17.1536	489	15.0705	416	14.8477	365	19.1023	657	12.4664	260	12.3867	359	15.7357	281
ENSMUSG00000025375	Aatk	3.71003	4.26205	2.97401	1.42405	0.509998	0.0586802	0.851842	11	120007313	120047167	-1	protein_coding	apoptosis-associated tyrosine kinase [Source:MGI Symbol;Acc:MGI:1197518]	ENSMUST00000064307,ENSMUST00000103019,ENSMUST00000103020,ENSMUST00000128836,ENSMUST00000132575,ENSMUST00000134319,ENSMUST00000136386,ENSMUST00000142959,ENSMUST00000150730	4.52517	129	3.94876	109	4.47466	110	4.09958	141	3.83582	80	2.62225	76	2.46395	44
ENSMUSG00000027580	Helz2	25.1046	23.1653	27.6904	-1.18854	-0.249185	0.0587062	0.851842	2	181227615	181242027	-1	protein_coding	helicase with zinc finger 2, transcriptional coactivator [Source:MGI Symbol;Acc:MGI:2385169]	ENSMUST00000094203,ENSMUST00000108831,ENSMUST00000121484,ENSMUST00000149417,ENSMUST00000155049	23.2573	663	22.3522	617	23.0649	567	23.9869	825	32.7484	683	25.7394	746	24.5835	439
ENSMUSG00000079608	Stard6	1.34737	1.05361	1.73905	-1.62632	-0.701614	0.0587477	0.851842	18	70472454	70501066	1	protein_coding	StAR-related lipid transfer (START) domain containing 6 [Source:MGI Symbol;Acc:MGI:2156774]	ENSMUST00000114959,ENSMUST00000164223,ENSMUST00000168249,ENSMUST00000173612,ENSMUST00000173951,ENSMUST00000174118,ENSMUST00000174667	1.05237	30	1.08682	30	1.05765	26	1.01763	35	1.34254	28	1.69066	49	2.18396	39
ENSMUSG00000031808	Slc27a1	24.8517	23.4091	26.7752	-1.21836	-0.28494	0.0588486	0.851895	8	71568882	71587302	1	protein_coding	solute carrier family 27 (fatty acid transporter), member 1 [Source:MGI Symbol;Acc:MGI:1347098]	ENSMUST00000034267,ENSMUST00000211811,ENSMUST00000211886,ENSMUST00000212111,ENSMUST00000212211,ENSMUST00000212225,ENSMUST00000212889,ENSMUST00000212989,ENSMUST00000213100	27.9228	796	18.8019	519	23.5937	580	23.3182	802	31.5976	659	24.7043	716	24.0235	429
ENSMUSG00000051236	Msrb3	103.175	106.456	98.8004	1.11684	0.159424	0.058867	0.851895	10	120781096	120899101	-1	protein_coding	methionine sulfoxide reductase B3 [Source:MGI Symbol;Acc:MGI:2443538]	ENSMUST00000092143,ENSMUST00000130950,ENSMUST00000139961	94.713	2700	110.493	3050	114.958	2826	105.659	3634	99.1561	2068	101.543	2943	95.7022	1709
ENSMUSG00000041272	Tox	11.4565	10.5582	12.6543	-1.2372	-0.307077	0.0591331	0.852127	4	6686353	6991557	-1	protein_coding	thymocyte selection-associated high mobility group box [Source:MGI Symbol;Acc:MGI:2181659]	ENSMUST00000039987,ENSMUST00000125974,ENSMUST00000147657,ENSMUST00000150082	11.4006	325	10.1074	279	8.74593	215	11.9789	412	12.3226	257	11.6966	339	13.9437	249
ENSMUSG00000049044	Rapgef4	8.85989	9.76151	7.65772	1.26926	0.343985	0.0591757	0.852127	2	71981240	72257474	1	protein_coding	Rap guanine nucleotide exchange factor (GEF) 4 [Source:MGI Symbol;Acc:MGI:1917723]	ENSMUST00000028525,ENSMUST00000090826,ENSMUST00000102698,ENSMUST00000122975,ENSMUST00000124004,ENSMUST00000146970,ENSMUST00000149421,ENSMUST00000150234,ENSMUST00000151236,ENSMUST00000153887,ENSMUST00000156031	10.0676	287	9.9987	276	9.7629	240	9.21679	317	8.53471	178	6.48661	188	7.95185	142
ENSMUSG00000041926	Rnpep	54.5345	51.8994	58.048	-1.13005	-0.176384	0.0592347	0.852127	1	135262712	135284084	-1	protein_coding	arginyl aminopeptidase (aminopeptidase B) [Source:MGI Symbol;Acc:MGI:2384902]	ENSMUST00000074357,ENSMUST00000077340,ENSMUST00000130069,ENSMUST00000141092,ENSMUST00000141234,ENSMUST00000152169,ENSMUST00000188053,ENSMUST00000189615,ENSMUST00000190632	53.4953	1525	52.5657	1451	52.5163	1291	49.0205	1686	57.0099	1189	60.9672	1767	56.1669	1003
ENSMUSG00000039883	Lrrc17	8.04379	7.75078	8.43447	-1.28719	-0.364229	0.0592539	0.852127	5	21543559	21575904	1	protein_coding	leucine rich repeat containing 17 [Source:MGI Symbol;Acc:MGI:1921761]	ENSMUST00000035651,ENSMUST00000199277	11.3656	324	6.41221	177	5.89842	145	7.32691	252	7.14422	149	9.14335	265	9.01583	161
ENSMUSG00000038607	Gng10	10.0373	11.6945	7.82759	1.34196	0.424345	0.0592567	0.852127	4	59035088	59041903	1	protein_coding	guanine nucleotide binding protein (G protein), gamma 10 [Source:MGI Symbol;Acc:MGI:1336169]	ENSMUST00000041160,ENSMUST00000126507	13.4703	384	5.90503	163	14.3189	352	13.0838	450	7.28807	152	8.97084	260	7.22386	129
ENSMUSG00000102302	Gm38190	2.17373	2.55835	1.66091	1.58588	0.665288	0.0593403	0.852127	1	165230371	165235125	-1	lncRNA	predicted gene, 38190 [Source:MGI Symbol;Acc:MGI:5611418]	ENSMUST00000192350	2.77123	79	2.60836	72	2.64412	65	2.2097	76	2.25355	47	2.00119	58	0.727986	13
ENSMUSG00000080316	Spaca6	31.8441	33.619	29.4775	1.16734	0.223223	0.0593455	0.852127	17	17827158	17843009	1	protein_coding	sperm acrosome associated 6 [Source:MGI Symbol;Acc:MGI:1922452]	ENSMUST00000012759,ENSMUST00000052338,ENSMUST00000133912,ENSMUST00000137228,ENSMUST00000139969,ENSMUST00000150302,ENSMUST00000154301,ENSMUST00000155293,ENSMUST00000172097,ENSMUST00000177859,ENSMUST00000178056,ENSMUST00000178408,ENSMUST00000178888,ENSMUST00000179350,ENSMUST00000226899,ENSMUST00000228490	31.0448	885	35.7925	988	37.9533	933	29.6856	1021	32.3168	674	28.3962	823	27.7195	495
ENSMUSG00000032012	Nectin1	25.3915	26.8672	23.424	1.17656	0.234573	0.0593906	0.852127	9	43743984	43832658	1	protein_coding	nectin cell adhesion molecule 1 [Source:MGI Symbol;Acc:MGI:1926483]	ENSMUST00000034510,ENSMUST00000180221,ENSMUST00000216893,ENSMUST00000216905,ENSMUST00000239313	25.1165	716	26.4821	731	27.7836	683	28.0865	966	26.1795	546	20.909	606	23.1836	414
ENSMUSG00000032006	Pdgfd	7.93815	7.40865	8.64416	-1.28915	-0.366424	0.0594115	0.852127	9	6168584	6378850	1	protein_coding	platelet-derived growth factor, D polypeptide [Source:MGI Symbol;Acc:MGI:1919035]	ENSMUST00000058692,ENSMUST00000168039,ENSMUST00000214892	9.54145	272	7.10053	196	6.10181	150	6.89079	237	7.52781	157	9.10885	264	9.29583	166
ENSMUSG00000052854	Nrk	253.093	245.047	263.82	-1.16008	-0.21423	0.0595257	0.852127	X	138914430	139010532	1	protein_coding	Nik related kinase [Source:MGI Symbol;Acc:MGI:1351326]	ENSMUST00000064937,ENSMUST00000113052,ENSMUST00000131829,ENSMUST00000142132,ENSMUST00000155201	293.68	8372	204.973	5658	214.743	5279	266.793	9176	257.192	5364	276.785	8022	257.483	4598
ENSMUSG00000071715	Ncf4	1.59762	1.88272	1.21748	1.72259	0.784582	0.0596759	0.852127	15	78244801	78262580	1	protein_coding	neutrophil cytosolic factor 4 [Source:MGI Symbol;Acc:MGI:109186]	ENSMUST00000096357,ENSMUST00000126028,ENSMUST00000133618,ENSMUST00000146147,ENSMUST00000147303,ENSMUST00000148646	1.36808	39	2.35477	65	1.22036	30	2.58768	89	0.575374	12	1.17311	34	1.90396	34
ENSMUSG00000045776	Lrtm1	2.84246	2.37321	3.46814	-1.43263	-0.518662	0.0596984	0.852127	14	29018208	29033645	1	protein_coding	leucine-rich repeats and transmembrane domains 1 [Source:MGI Symbol;Acc:MGI:2442106]	ENSMUST00000055662,ENSMUST00000224708,ENSMUST00000224760	2.24505	64	2.46345	68	2.19665	54	2.58768	89	3.06866	64	3.41582	99	3.91993	70
ENSMUSG00000038403	Hjv	1.65906	0.946248	2.60947	-2.11187	-1.07852	0.0597454	0.852127	3	96525172	96529210	1	protein_coding	hemojuvelin BMP co-receptor [Source:MGI Symbol;Acc:MGI:1916835]	ENSMUST00000049208	0.982208	28	0.796998	22	0.610181	15	1.3956	48	1.0069	21	5.58952	162	1.23198	22
ENSMUSG00000113640	Adat3	3.1695	2.56895	3.97024	-1.42352	-0.509465	0.0597777	0.852127	10	80602880	80607654	1	protein_coding	adenosine deaminase, tRNA-specific 3 [Source:MGI Symbol;Acc:MGI:1924344]	ENSMUST00000038411,ENSMUST00000221670,ENSMUST00000221960	1.9995	57	3.07931	85	2.52208	62	2.6749	92	4.69889	98	4.2439	123	2.96794	53
ENSMUSG00000024642	Tle4	27.7235	29.555	25.2815	1.16905	0.225339	0.0597963	0.852127	19	14448150	14598051	-1	protein_coding	transducin-like enhancer of split 4 [Source:MGI Symbol;Acc:MGI:104633]	ENSMUST00000052011,ENSMUST00000167776,ENSMUST00000235975	29.5013	841	28.9818	800	27.987	688	31.75	1092	23.5424	491	27.3266	792	24.9755	446
ENSMUSG00000029832	Nfe2l3	12.5995	13.652	11.1962	1.23051	0.29926	0.0598989	0.852127	6	51432670	51458768	1	protein_coding	nuclear factor, erythroid derived 2, like 3 [Source:MGI Symbol;Acc:MGI:1339958]	ENSMUST00000005103,ENSMUST00000061507,ENSMUST00000160133	13.6808	390	13.9475	385	11.9189	293	15.0609	518	11.3636	237	8.72932	253	13.4957	241
ENSMUSG00000042354	Gnl3	60.6395	63.7609	56.4777	1.14041	0.189553	0.0599845	0.852127	14	31012433	31019152	-1	protein_coding	guanine nucleotide binding protein-like 3 (nucleolar) [Source:MGI Symbol;Acc:MGI:1353651]	ENSMUST00000037739,ENSMUST00000226220,ENSMUST00000226379,ENSMUST00000226740,ENSMUST00000227087,ENSMUST00000227170,ENSMUST00000227389,ENSMUST00000227467,ENSMUST00000227869,ENSMUST00000228341,ENSMUST00000228427,ENSMUST00000228713,ENSMUST00000228739,ENSMUST00000228774	62.6509	1786	64.6655	1785	62.2792	1531	65.4479	2251	48.2834	1007	61.6228	1786	59.5269	1063
ENSMUSG00000097381	A230087F16Rik	1.50772	1.09956	2.05195	-1.62312	-0.698771	0.0600197	0.852127	12	111284762	111293988	1	lncRNA	RIKEN cDNA A230087F16 gene [Source:MGI Symbol;Acc:MGI:2444635]	ENSMUST00000181055,ENSMUST00000181561	0.666499	19	1.08682	30	1.42376	35	1.22115	42	2.06176	43	1.51814	44	2.57595	46
ENSMUSG00000031232	Magt1	104.931	109.81	98.4248	1.11707	0.159717	0.0600337	0.852127	X	105968084	106011906	-1	protein_coding	magnesium transporter 1 [Source:MGI Symbol;Acc:MGI:1914325]	ENSMUST00000033583,ENSMUST00000113566,ENSMUST00000139421,ENSMUST00000151689,ENSMUST00000238718	109.446	3120	102.378	2826	110.565	2718	116.853	4019	90.5734	1889	100.991	2927	103.71	1852
ENSMUSG00000018796	Acsl1	28.2715	29.9648	26.0137	1.20004	0.263079	0.0600434	0.852127	8	46471037	46536051	1	protein_coding	acyl-CoA synthetase long-chain family member 1 [Source:MGI Symbol;Acc:MGI:102797]	ENSMUST00000034046,ENSMUST00000110371,ENSMUST00000110372,ENSMUST00000128746,ENSMUST00000130563,ENSMUST00000133161,ENSMUST00000135955,ENSMUST00000152423,ENSMUST00000210929,ENSMUST00000211289,ENSMUST00000211644	26.9055	767	31.8799	880	29.004	713	32.0698	1103	22.008	459	31.2254	905	24.8075	443
ENSMUSG00000032238	Rora	14.4073	15.3195	13.191	1.23153	0.300451	0.060119	0.852127	9	68653786	69388246	1	protein_coding	RAR-related orphan receptor alpha [Source:MGI Symbol;Acc:MGI:104661]	ENSMUST00000034766,ENSMUST00000113624,ENSMUST00000132355,ENSMUST00000140351,ENSMUST00000143507,ENSMUST00000174296	12.8739	367	14.9256	412	15.5393	382	17.9393	617	14.9118	311	10.6615	309	13.9997	250
ENSMUSG00000093989	Rnasek	28.6974	27.0449	30.9007	-1.16237	-0.217068	0.0601556	0.852127	11	70238124	70239842	-1	protein_coding	ribonuclease, RNase K [Source:MGI Symbol;Acc:MGI:106369]	ENSMUST00000040428,ENSMUST00000125752,ENSMUST00000141880	28.449	811	26.1923	723	27.6616	680	25.8768	890	29.9674	625	30.5354	885	32.1994	575
ENSMUSG00000028023	Pitx2	37.9824	40.2922	34.9025	1.21814	0.284677	0.0602754	0.852425	3	129199878	129219591	1	protein_coding	paired-like homeodomain transcription factor 2 [Source:MGI Symbol;Acc:MGI:109340]	ENSMUST00000029657,ENSMUST00000042587,ENSMUST00000106382,ENSMUST00000172645,ENSMUST00000173645,ENSMUST00000174623,ENSMUST00000174661,ENSMUST00000187145	35.2893	1006	47.2765	1305	42.55	1046	36.0531	1240	36.2965	757	26.1879	759	42.2232	754
ENSMUSG00000047963	Stbd1	59.2194	62.0613	55.4302	1.14168	0.191158	0.0602924	0.852425	5	92603041	92606579	1	protein_coding	starch binding domain 1 [Source:MGI Symbol;Acc:MGI:1261768]	ENSMUST00000050952,ENSMUST00000200941,ENSMUST00000202332	58.5817	1670	67.5999	1866	61.5876	1514	60.4761	2080	50.0575	1044	60.3461	1749	55.887	998
ENSMUSG00000112907	Gm47015	1.42858	1.23638	1.68485	-1.60936	-0.686485	0.0604379	0.853235	10	79412962	79417905	-1	lncRNA	predicted gene, 47015 [Source:MGI Symbol;Acc:MGI:6095697]	ENSMUST00000217947	1.8241	52	1.08682	30	1.01697	25	1.01763	35	1.43843	30	1.65615	48	1.95996	35
ENSMUSG00000037989	Wnk2	11.6392	12.4718	10.5292	1.24006	0.310409	0.0604655	0.853235	13	49036303	49148014	-1	protein_coding	WNK lysine deficient protein kinase 2 [Source:MGI Symbol;Acc:MGI:1922857]	ENSMUST00000035538,ENSMUST00000049265,ENSMUST00000091623,ENSMUST00000110096,ENSMUST00000110097,ENSMUST00000159196,ENSMUST00000159559,ENSMUST00000159633,ENSMUST00000160087,ENSMUST00000162403,ENSMUST00000162581	10.8394	309	13.4765	372	13.9121	342	11.6591	401	12.1308	253	9.93693	288	9.51982	170
ENSMUSG00000033083	Tbc1d4	55.3658	58.2312	51.5454	1.1287	0.17466	0.0605723	0.853925	14	101442360	101609191	-1	protein_coding	TBC1 domain family, member 4 [Source:MGI Symbol;Acc:MGI:2429660]	ENSMUST00000100340,ENSMUST00000159484,ENSMUST00000159664,ENSMUST00000159668,ENSMUST00000159951,ENSMUST00000160297,ENSMUST00000160473,ENSMUST00000161304,ENSMUST00000161991,ENSMUST00000162617	58.4063	1665	60.3545	1666	57.4384	1412	56.7254	1951	53.7974	1122	50.7197	1470	50.1191	895
ENSMUSG00000032666	1700025G04Rik	59.8921	61.5572	57.672	1.12262	0.166867	0.0608729	0.857342	1	151852403	152090125	-1	protein_coding	RIKEN cDNA 1700025G04 gene [Source:MGI Symbol;Acc:MGI:1916649]	ENSMUST00000044581,ENSMUST00000121533,ENSMUST00000128433,ENSMUST00000187603	52.022	1483	61.1153	1687	66.9166	1645	66.1748	2276	54.8043	1143	61.4847	1782	56.7269	1013
ENSMUSG00000064125	Prr36	1.37054	1.29955	1.46518	-1.65911	-0.730409	0.0610968	0.859673	8	4209543	4217459	-1	protein_coding	proline rich 36 [Source:MGI Symbol;Acc:MGI:3605626]	ENSMUST00000168386,ENSMUST00000175906,ENSMUST00000176227,ENSMUST00000177491	2.56076	73	1.05059	29	0.97629	24	0.610576	21	1.86996	39	1.0696	31	1.45597	26
ENSMUSG00000028015	Ctso	10.2822	9.60473	11.1855	-1.25486	-0.327523	0.0613784	0.862811	3	81932601	81956725	1	protein_coding	cathepsin O [Source:MGI Symbol;Acc:MGI:2139628]	ENSMUST00000029649,ENSMUST00000143307,ENSMUST00000155144,ENSMUST00000192067	11.9268	340	8.33225	230	9.64087	237	8.51899	293	9.20598	192	13.7668	399	10.5838	189
ENSMUSG00000068923	Syt11	90.0711	87.9589	92.8873	-1.14649	-0.19722	0.0615632	0.86413	3	88744700	88775164	-1	protein_coding	synaptotagmin XI [Source:MGI Symbol;Acc:MGI:1859547]	ENSMUST00000090945,ENSMUST00000107503,ENSMUST00000107505,ENSMUST00000130869,ENSMUST00000183267	107.622	3068	69.1939	1910	90.6729	2229	84.3467	2901	97.5738	2035	88.0177	2551	93.0703	1662
ENSMUSG00000101355	H3c10	0.960388	0.660676	1.36	-1.70397	-0.768901	0.0615895	0.86413	13	21717659	21718069	1	protein_coding	H3 clustered histone 10 [Source:MGI Symbol;Acc:MGI:2448349]	ENSMUST00000188775	0.280631	8	0.833225	23	0.772896	19	0.755951	26	1.0069	21	1.44914	42	1.62397	29
ENSMUSG00000033453	Adamts15	71.9499	67.4574	77.9401	-1.15624	-0.209446	0.0617132	0.865042	9	30899155	30922452	-1	protein_coding	a disintegrin-like and metallopeptidase (reprolysin type) with thrombospondin type 1 motif, 15 [Source:MGI Symbol;Acc:MGI:2449569]	ENSMUST00000065112,ENSMUST00000216215,ENSMUST00000217070	66.72	1902	57.0216	1574	67.1199	1650	78.9678	2716	84.2443	1757	68.9374	1998	80.6385	1440
ENSMUSG00000009097	Tbx1	5.32561	5.96596	4.4718	1.35489	0.438172	0.0619091	0.866359	16	18580979	18590671	-1	protein_coding	T-box 1 [Source:MGI Symbol;Acc:MGI:98493]	ENSMUST00000009241,ENSMUST00000232143,ENSMUST00000232335,ENSMUST00000232557,ENSMUST00000232589	5.89325	168	5.68767	157	6.46792	159	5.81501	200	4.89068	102	3.48483	101	5.03991	90
ENSMUSG00000038677	Scube3	30.0756	33.0506	26.1089	1.16456	0.219781	0.0620267	0.866359	17	28142141	28174854	1	protein_coding	signal peptide, CUB domain, EGF-like 3 [Source:MGI Symbol;Acc:MGI:3045253]	ENSMUST00000043503,ENSMUST00000132670,ENSMUST00000137147,ENSMUST00000142170,ENSMUST00000148342,ENSMUST00000232984,ENSMUST00000233905	40.4109	1152	25.3228	699	30.9972	762	35.4716	1220	23.6862	494	26.809	777	27.8315	497
ENSMUSG00000037287	Tbcel	43.6056	45.7328	40.7693	1.14308	0.192925	0.0620373	0.866359	9	42412316	42507809	-1	protein_coding	tubulin folding cofactor E-like [Source:MGI Symbol;Acc:MGI:1925543]	ENSMUST00000066148,ENSMUST00000066179,ENSMUST00000125995,ENSMUST00000128959,ENSMUST00000134374,ENSMUST00000138506,ENSMUST00000142775,ENSMUST00000213428	43.2873	1234	45.3202	1251	47.5128	1168	46.8108	1610	43.6805	911	39.0922	1133	39.5353	706
ENSMUSG00000069014	Gm5641	247.513	261.65	228.664	1.17411	0.231567	0.0621045	0.866359	3	54481438	54482925	1	transcribed_processed_pseudogene	predicted gene 5641 [Source:MGI Symbol;Acc:MGI:3645731]	ENSMUST00000091130,ENSMUST00000198699	237.484	6770	310.721	8577	267.626	6579	230.769	7937	222.909	4649	212.264	6152	250.819	4479
ENSMUSG00000052310	Slc39a1	98.0869	93.6268	104.034	-1.11947	-0.16282	0.0621282	0.866359	3	90248172	90253612	1	protein_coding	solute carrier family 39 (zinc transporter), member 1 [Source:MGI Symbol;Acc:MGI:1353474]	ENSMUST00000015467	95.7302	2729	90.3868	2495	96.7748	2379	91.6155	3151	104.958	2189	100.577	2915	106.566	1903
ENSMUSG00000038181	Chpf2	60.1629	57.3933	63.8558	-1.16025	-0.214432	0.0621601	0.866359	5	24586741	24594556	1	protein_coding	chondroitin polymerizing factor 2 [Source:MGI Symbol;Acc:MGI:1917522]	ENSMUST00000088295,ENSMUST00000121863,ENSMUST00000197318,ENSMUST00000197566,ENSMUST00000197933,ENSMUST00000198521	64.51	1839	49.2327	1359	61.3436	1508	54.4866	1874	70.8669	1478	57.3099	1661	63.3908	1132
ENSMUSG00000021196	Pfkp	354.265	368.36	335.471	1.15785	0.211446	0.0622707	0.866658	13	6579768	6648777	-1	protein_coding	phosphofructokinase, platelet [Source:MGI Symbol;Acc:MGI:1891833]	ENSMUST00000021614,ENSMUST00000131648,ENSMUST00000133041,ENSMUST00000135761,ENSMUST00000136585,ENSMUST00000137327,ENSMUST00000138703,ENSMUST00000142372,ENSMUST00000142972,ENSMUST00000144053,ENSMUST00000148999,ENSMUST00000151894,ENSMUST00000154100	314.342	8961	403.064	11126	389.865	9584	366.171	12594	381.137	7949	290.345	8415	334.93	5981
ENSMUSG00000082016	Pgam1-ps2	48.1892	40.0458	59.0472	-1.34402	-0.426559	0.062397	0.866658	7	27469771	27470535	-1	processed_pseudogene	phosphoglycerate mutase 1, pseudogene 2 [Source:MGI Symbol;Acc:MGI:3645709]	ENSMUST00000117129	26.7652	763	29.815	823	58.7401	1444	44.8628	1543	75.4699	1574	44.8887	1301	56.7829	1014
ENSMUSG00000003541	Ier3	24.9807	26.1821	23.3788	1.16702	0.222828	0.0624669	0.866658	17	35821684	35822923	1	protein_coding	immediate early response 3 [Source:MGI Symbol;Acc:MGI:104814]	ENSMUST00000003635	22.7662	649	24.9243	688	29.126	716	27.912	960	23.878	498	23.6347	685	22.6236	404
ENSMUSG00000031827	Cotl1	82.8348	78.7967	88.2189	-1.12028	-0.163858	0.0624751	0.866658	8	119809222	119840544	-1	protein_coding	coactosin-like 1 (Dictyostelium) [Source:MGI Symbol;Acc:MGI:1919292]	ENSMUST00000034285,ENSMUST00000168698,ENSMUST00000211873,ENSMUST00000212676	79.1379	2256	83.3588	2301	81.805	2011	70.885	2438	98.293	2050	83.8773	2431	82.4865	1473
ENSMUSG00000117013	Gm30531	1.04112	0.821314	1.3342	-1.69096	-0.757843	0.0624879	0.866658	17	21615500	21656484	1	transcribed_processed_pseudogene	predicted gene, 30531 [Source:MGI Symbol;Acc:MGI:5589690]	ENSMUST00000232774,ENSMUST00000232793,ENSMUST00000233749	0.876972	25	0.978134	27	0.528824	13	0.901327	31	1.39049	29	1.38013	40	1.23198	22
ENSMUSG00000067279	Ppp1r3c	97.9422	99.5455	95.8045	1.11605	0.158405	0.0625885	0.866658	19	36731731	36736653	-1	protein_coding	protein phosphatase 1, regulatory subunit 3C [Source:MGI Symbol;Acc:MGI:1858229]	ENSMUST00000087321	77.0332	2196	101.69	2807	116.097	2854	103.362	3555	92.8749	1937	96.9886	2811	97.5502	1742
ENSMUSG00000021365	Nedd9	69.3994	68.8692	70.1062	-1.12463	-0.169445	0.0625932	0.866658	13	41309581	41487362	-1	protein_coding	neural precursor cell expressed, developmentally down-regulated gene 9 [Source:MGI Symbol;Acc:MGI:97302]	ENSMUST00000021794,ENSMUST00000163623,ENSMUST00000224083,ENSMUST00000224803,ENSMUST00000225053,ENSMUST00000225297	88.8197	2532	58.9416	1627	62.2385	1530	65.477	2252	70.1956	1464	63.7965	1849	76.3266	1363
ENSMUSG00000010609	Psen2	13.8804	12.7313	15.4126	-1.21402	-0.279789	0.062662	0.866795	1	180227004	180263438	-1	protein_coding	presenilin 2 [Source:MGI Symbol;Acc:MGI:109284]	ENSMUST00000010753,ENSMUST00000111104,ENSMUST00000111105,ENSMUST00000111106,ENSMUST00000111108,ENSMUST00000128223,ENSMUST00000130029,ENSMUST00000130711,ENSMUST00000133340,ENSMUST00000136291,ENSMUST00000149590,ENSMUST00000193897	12.909	368	13.6939	378	11.8782	292	12.4441	428	15.7748	329	13.6633	396	16.7997	300
ENSMUSG00000058571	Gpc6	25.86	25.2998	26.6069	-1.18096	-0.239956	0.0628434	0.868489	14	116925315	117976544	1	protein_coding	glypican 6 [Source:MGI Symbol;Acc:MGI:1346322]	ENSMUST00000078849,ENSMUST00000088483,ENSMUST00000123239,ENSMUST00000125435	33.36	951	19.0555	526	24.2445	596	24.5393	844	26.7069	557	28.8102	835	24.3035	434
ENSMUSG00000024927	Rela	59.9148	56.6826	64.2244	-1.1372	-0.185486	0.0631396	0.871765	19	5637483	5648130	1	protein_coding	v-rel reticuloendotheliosis viral oncogene homolog A (avian) [Source:MGI Symbol;Acc:MGI:103290]	ENSMUST00000025867,ENSMUST00000236300,ENSMUST00000237361,ENSMUST00000237838,ENSMUST00000237863,ENSMUST00000238000,ENSMUST00000238126	57.5644	1641	53.0728	1465	59.7164	1468	56.3765	1939	70.6271	1473	62.0713	1799	59.9749	1071
ENSMUSG00000062380	Tubb3	31.9926	27.8663	37.4945	-1.25387	-0.326387	0.0635681	0.876859	8	123411424	123422015	1	protein_coding	tubulin, beta 3 class III [Source:MGI Symbol;Acc:MGI:107813]	ENSMUST00000071134,ENSMUST00000212743	23.7133	676	27.6051	762	32.7871	806	27.3596	941	46.2217	964	26.2225	760	40.0392	715
ENSMUSG00000087235	Gm4750	5.40248	4.45763	6.66228	-1.40984	-0.495535	0.0636642	0.877362	X	152432477	152434676	1	transcribed_processed_pseudogene	predicted gene 4750 [Source:MGI Symbol;Acc:MGI:3647391]	ENSMUST00000151942,ENSMUST00000152262	4.34978	124	4.5284	125	4.27127	105	4.68108	161	5.514	115	9.93693	288	4.53591	81
ENSMUSG00000042492	Tbc1d10b	67.4928	64.0693	72.0574	-1.12596	-0.171162	0.0637609	0.877638	7	127197459	127208468	-1	protein_coding	TBC1 domain family, member 10b [Source:MGI Symbol;Acc:MGI:1915699]	ENSMUST00000120705,ENSMUST00000124240,ENSMUST00000133666,ENSMUST00000137987,ENSMUST00000138219,ENSMUST00000147520,ENSMUST00000153857,ENSMUST00000205620	64.5802	1841	62.0934	1714	64.8826	1595	64.7211	2226	77.8193	1623	71.0421	2059	67.3107	1202
ENSMUSG00000022887	Masp1	112.818	118.55	105.175	1.15989	0.213991	0.0638461	0.877638	16	23449417	23520815	-1	protein_coding	mannan-binding lectin serine peptidase 1 [Source:MGI Symbol;Acc:MGI:88492]	ENSMUST00000089883,ENSMUST00000229152,ENSMUST00000229619,ENSMUST00000230040	111.305	3173	114.949	3173	128.708	3164	119.237	4101	122.171	2548	86.8446	2517	106.51	1902
ENSMUSG00000039987	Phtf2	60.1111	62.7384	56.608	1.13317	0.18036	0.0638629	0.877638	5	20758663	20882124	-1	protein_coding	putative homeodomain transcription factor 2 [Source:MGI Symbol;Acc:MGI:1916020]	ENSMUST00000118174,ENSMUST00000124431,ENSMUST00000133784,ENSMUST00000139325,ENSMUST00000140147,ENSMUST00000153194,ENSMUST00000156044	59.0027	1682	64.9916	1794	62.4419	1535	64.5175	2219	50.1055	1045	60.8637	1764	58.8549	1051
ENSMUSG00000040856	Dlk1	222.499	206.228	244.194	-1.19435	-0.256223	0.064027	0.877809	12	109452823	109463336	1	protein_coding	delta like non-canonical Notch ligand 1 [Source:MGI Symbol;Acc:MGI:94900]	ENSMUST00000056110,ENSMUST00000109841,ENSMUST00000109842,ENSMUST00000109843,ENSMUST00000109844,ENSMUST00000109846,ENSMUST00000124293,ENSMUST00000173539,ENSMUST00000173812,ENSMUST00000174539	229.24	6535	200.336	5530	201.116	4944	194.221	6680	330.217	6887	193.322	5603	209.044	3733
ENSMUSG00000018659	Pnpo	26.8317	28.2196	24.9811	1.16164	0.216164	0.0640524	0.877809	11	96937825	96943986	-1	protein_coding	pyridoxine 5'-phosphate oxidase [Source:MGI Symbol;Acc:MGI:2144151]	ENSMUST00000018803,ENSMUST00000107629,ENSMUST00000153896	25.9584	740	27.6413	763	26.2785	646	33.0002	1135	21.5765	450	24.3593	706	29.0075	518
ENSMUSG00000035150	Eif2s3x	218.556	202.909	239.419	-1.17824	-0.236632	0.0640541	0.877809	X	94188707	94212862	-1	protein_coding	eukaryotic translation initiation factor 2, subunit 3, structural gene X-linked [Source:MGI Symbol;Acc:MGI:1349431]	ENSMUST00000050328,ENSMUST00000113922,ENSMUST00000127963	200.371	5712	233.05	6433	177.685	4368	200.531	6897	213.703	4457	263.087	7625	241.467	4312
ENSMUSG00000031807	Pgls	63.4431	59.6356	68.5197	-1.1306	-0.177083	0.0642469	0.879633	8	71592176	71601092	1	protein_coding	6-phosphogluconolactonase [Source:MGI Symbol;Acc:MGI:1913421]	ENSMUST00000034264,ENSMUST00000123240,ENSMUST00000127626,ENSMUST00000138742,ENSMUST00000143441	57.389	1636	60.8979	1681	61.2622	1506	58.9933	2029	76.285	1591	61.7953	1791	67.4787	1205
ENSMUSG00000025488	Cox8b	2.66942	2.2054	3.28811	-1.44327	-0.529341	0.0643447	0.880155	7	140898945	140900446	-1	protein_coding	cytochrome c oxidase subunit 8B [Source:MGI Symbol;Acc:MGI:105958]	ENSMUST00000026561	2.03457	58	2.42722	67	2.23733	55	2.12248	73	3.64403	76	3.58834	104	2.63195	47
ENSMUSG00000104608	Gm44390	1.08593	0.85607	1.39241	-1.64861	-0.72125	0.0644145	0.880292	13	22035164	22035307	1	miRNA	predicted gene, 44390 [Source:MGI Symbol;Acc:MGI:5690782]	ENSMUST00000197533	0.876972	25	0.652089	18	0.732218	18	1.163	40	1.24664	26	1.13861	33	1.79197	32
ENSMUSG00000028703	Lrrc41	88.5477	85.3846	92.7653	-1.11334	-0.154891	0.0647141	0.883048	4	116075269	116097043	1	protein_coding	leucine rich repeat containing 41 [Source:MGI Symbol;Acc:MGI:2441984]	ENSMUST00000030471,ENSMUST00000133799,ENSMUST00000134983,ENSMUST00000138952,ENSMUST00000152577,ENSMUST00000154274	91.5208	2609	80.8953	2233	83.3508	2049	85.7714	2950	92.3954	1927	92.1581	2671	93.7422	1674
ENSMUSG00000051674	Dcun1d4	26.5542	28.4969	23.964	1.16945	0.225834	0.0647361	0.883048	5	73481000	73560794	1	protein_coding	DCN1, defective in cullin neddylation 1, domain containing 4 (S. cerevisiae) [Source:MGI Symbol;Acc:MGI:2140972]	ENSMUST00000063882,ENSMUST00000087181,ENSMUST00000113558,ENSMUST00000130087,ENSMUST00000133137,ENSMUST00000134092,ENSMUST00000136268,ENSMUST00000141553,ENSMUST00000145645,ENSMUST00000149970,ENSMUST00000156806	30.238	862	28.5833	789	28.0683	690	27.0979	932	22.1998	463	27.7406	804	21.9516	392
ENSMUSG00000030966	Trim21	4.29049	3.92414	4.77896	-1.36734	-0.451375	0.0648821	0.884052	7	102557921	102565486	-1	protein_coding	tripartite motif-containing 21 [Source:MGI Symbol;Acc:MGI:106657]	ENSMUST00000033264,ENSMUST00000106913,ENSMUST00000209679,ENSMUST00000209907,ENSMUST00000210261	5.22675	149	3.91254	108	3.21362	79	3.34363	115	4.65094	97	5.48601	159	4.19992	75
ENSMUSG00000018830	Myh11	6.2265	7.7293	4.22276	1.38796	0.472966	0.064952	0.884052	16	14194535	14291372	-1	protein_coding	myosin, heavy polypeptide 11, smooth muscle [Source:MGI Symbol;Acc:MGI:102643]	ENSMUST00000090287,ENSMUST00000230397,ENSMUST00000230643,ENSMUST00000231567	12.4881	356	3.18799	88	8.99001	221	6.25114	215	3.2125	67	3.96787	115	5.4879	98
ENSMUSG00000026156	B3gat2	1.36271	1.03216	1.80345	-1.5944	-0.673016	0.0649897	0.884052	1	23761753	23849158	1	protein_coding	beta-1,3-glucuronyltransferase 2 (glucuronosyltransferase S) [Source:MGI Symbol;Acc:MGI:2389490]	ENSMUST00000063663,ENSMUST00000140583,ENSMUST00000144602	0.701577	20	1.01436	28	0.813575	20	1.59913	55	2.06176	43	1.27662	37	2.07196	37
ENSMUSG00000031377	Bmx	12.4212	11.9701	13.0227	-1.23647	-0.30623	0.0651717	0.885176	X	164192842	164258193	-1	protein_coding	BMX non-receptor tyrosine kinase [Source:MGI Symbol;Acc:MGI:1101778]	ENSMUST00000112263,ENSMUST00000112265	16.1714	461	10.1436	280	12.8138	315	8.75159	301	11.0759	231	15.1124	438	12.8798	230
ENSMUSG00000042155	Klhl23	77.7125	80.498	73.9985	1.13254	0.179566	0.0651925	0.885176	2	69821944	69836651	1	protein_coding	kelch-like 23 [Source:MGI Symbol;Acc:MGI:2683536]	ENSMUST00000053087,ENSMUST00000135759,ENSMUST00000152898	71.596	2041	84.6629	2337	81.7643	2010	83.9687	2888	73.5519	1534	83.4288	2418	65.0148	1161
ENSMUSG00000031314	Taf1	51.8022	54.653	48.0011	1.13257	0.179602	0.0653311	0.885963	X	101532734	101601789	1	protein_coding	TATA-box binding protein associated factor 1 [Source:MGI Symbol;Acc:MGI:1336878]	ENSMUST00000101341,ENSMUST00000118878,ENSMUST00000129487,ENSMUST00000140470,ENSMUST00000143908,ENSMUST00000149274,ENSMUST00000211461	55.3895	1579	52.783	1457	52.6383	1294	57.8012	1988	46.0299	960	49.9262	1447	48.0471	858
ENSMUSG00000031596	Slc7a2	11.3363	12.4838	9.80616	1.24218	0.312879	0.0653707	0.885963	8	40862396	40922308	1	protein_coding	solute carrier family 7 (cationic amino acid transporter, y+ system), member 2 [Source:MGI Symbol;Acc:MGI:99828]	ENSMUST00000057784,ENSMUST00000098816,ENSMUST00000117077,ENSMUST00000118432,ENSMUST00000141505	12.9792	370	10.7957	298	10.9833	270	15.1772	522	9.39777	196	9.6609	280	10.3598	185
ENSMUSG00000030613	Ccdc90b	30.1834	32.1343	27.5823	1.16231	0.216998	0.0655609	0.887723	7	92561149	92582294	1	protein_coding	coiled-coil domain containing 90B [Source:MGI Symbol;Acc:MGI:1913615]	ENSMUST00000032842,ENSMUST00000085017,ENSMUST00000153776	32.448	925	33.0754	913	32.3396	795	30.6742	1055	25.6041	534	29.9833	869	27.1595	485
ENSMUSG00000113424	Gm48161	131.649	136.993	124.524	1.1273	0.172876	0.0656963	0.88874	13	30370359	30377183	1	lncRNA	predicted gene, 48161 [Source:MGI Symbol;Acc:MGI:6097531]	ENSMUST00000222575	126.986	3620	121.832	3363	142.701	3508	156.453	5381	106.444	2220	137.323	3980	129.806	2318
ENSMUSG00000030000	Add2	13.646	14.1563	12.9656	1.20889	0.273681	0.0658336	0.88978	6	86028681	86124409	1	protein_coding	adducin 2 (beta) [Source:MGI Symbol;Acc:MGI:87919]	ENSMUST00000032069,ENSMUST00000203196,ENSMUST00000203279,ENSMUST00000203366,ENSMUST00000203445,ENSMUST00000203529,ENSMUST00000203724,ENSMUST00000203786,ENSMUST00000204059,ENSMUST00000205034	9.54145	272	13.6214	376	13.9528	343	19.5094	671	11.939	249	11.11	322	15.8477	283
ENSMUSG00000034845	Plvap	77.3908	71.4732	85.2809	-1.14555	-0.196041	0.0659594	0.890664	8	71497765	71511752	-1	protein_coding	plasmalemma vesicle associated protein [Source:MGI Symbol;Acc:MGI:1890497]	ENSMUST00000048452	67.0357	1911	73.3238	2024	79.2422	1948	66.2911	2280	75.4699	1574	112.446	3259	67.9267	1213
[truncated: 13,641 more rows]

## Sheet: Sheet 2. DEG
ID	mgi_symbol	AvrExp	ave_Mut_Het	ave_WT_Het	foldChange	logFC	P.Value	adj.P.Val	chr	start	end	strand	biotype	desc	ensembl_transcript_id	Norm_S5_MUT1_EAX	Raw_S5_MUT1_EAX	Norm_S6_MUT3_EAX	Raw_S6_MUT3_EAX	Norm_S7_MUT4_EAX	Raw_S7_MUT4_EAX	Norm_S8_MUT5_EAX	Raw_S8_MUT5_EAX	Norm_S2_WT3_EAX	Raw_S2_WT3_EAX	Norm_S3_WT4_EAX	Raw_S3_WT4_EAX	Norm_S4_WT5_EAX	Raw_S4_WT5_EAX
[truncated: 114 more rows]

[truncated: 2 more sheets: Sheet 3. IPA data, Sheet 4. GSEA data]
